# Supplementary material for: Transcriptomic profile of the zoonotic parasite Anisakis pegreffii upon in vitro exposure to human dendritic cells
Source: Front Cell Infect Microbiol. 2025 Sep 15;15:1646537. doi: 10.3389/fcimb.2025.1646537 (PMC12477248; doi:10.3389/fcimb.2025.1646537)
Supplement: Supplementary file 4 [file Table2.xlsx]

## Sheet: Sheet1
Table S2. List of differential expressed genes (DEGs).
transcript	row	protein accession	sequence identity	alignment length	e-value	padj	log2FoldChange	database	locus name	sequence description	sequence length	division	gene	organism	protein product
A2.transcripts:Locus_162_Transcript_115_289_Confidence_0.045_Length_2059	Anisakis	KHN83190.1	97.4	151	1.78e-75	9.09596854118531e-12	28.5548	Nr	KHN83190	Calponin -like protein OV9M [Toxocara canis]	388	INV	NA	Toxocara canis	Calponin -like protein OV9M
A2.transcripts:Locus_10797_Transcript_14_40_Confidence_0.352_Length_1997	Anisakis	KHN84575.1	79.9	219	4.48e-128	1.50865849875517e-11	28.244	Nr	KHN84575	Putative tyrosinase-like protein tyr-1 [Toxocara canis]	556	INV	tyr-1	Toxocara canis	putative tyrosinase-like protein tyr-1
A2.transcripts:Locus_4_Transcript_364_510_Confidence_0.008_Length_2141	Anisakis	A0A0M3KAW0	37.2	94	6.15e-10	3.99088028212908e-11	28.1983	TrEMBL	A0A0M3KAW0_ANISI	NA	123	NA	ASIM_LOCUS17505	Anisakis simplex	Col_cuticle_N domain-containing protein
A2.transcripts:Locus_4_Transcript_242_510_Confidence_0.006_Length_1606	Anisakis	A0A3P7FK88	56.3	112	7.88e-28	8.94945686082992e-11	27.9301	TrEMBL	A0A3P7FK88_WUCBA	NA	156	NA	WBA_LOCUS4564	Wuchereria bancrofti	Col_cuticle_N domain-containing protein
A2.transcripts:Locus_3604_Transcript_1_69_Confidence_0.097_Length_889	Anisakis	A0A0M3K8E8	97.9	48	6.97e-24	3.7151200149521e-10	27.3917	TrEMBL	A0A0M3K8E8_ANISI	NA	220	NA	ASIM_LOCUS16646	Anisakis simplex	Col_cuticle_N domain-containing protein
A2.transcripts:Locus_20476_Transcript_3_9_Confidence_0.514_Length_3534	Anisakis	KHN77986.1	56.2	577	1.33e-147	2.35901923956259e-06	22.0726	Nr	KHN77986	Ras GTPase-activating protein-binding protein 2 [Toxocara canis]	519	INV	G3BP2	Toxocara canis	Ras GTPase-activating protein-binding protein 2
A2.transcripts:Locus_44629_Transcript_1_1_Confidence_1.000_Length_317	Anisakis	KHN75539.1	88.7	53	3.34e-26	2.37428532066116e-06	22.0663	Nr	KHN75539	60S ribosomal protein L39 [Toxocara canis]	91	INV	RpL39	Toxocara canis	60S ribosomal protein L39
A2.transcripts:Locus_1167_Transcript_18_75_Confidence_0.120_Length_3062	Anisakis	A0A0M3JY00	97.0	234	7.40e-125	2.43063622651562e-06	22.0412	TrEMBL	A0A0M3JY00_ANISI	NA	455	NA	ASIM_LOCUS12718	Anisakis simplex	SH3 domain-containing protein
A2.transcripts:Locus_681_Transcript_16_32_Confidence_0.606_Length_4687	Anisakis	KHN85787.1	91.9	357	8.77e-226	2.43063622651562e-06	22.0412	Nr	KHN85787	Aryl hydrocarbon receptor nuclear translocator -like protein [Toxocara canis]	513	INV	aha-1	Toxocara canis	Aryl hydrocarbon receptor nuclear translocator -like protein
A2.transcripts:Locus_3_Transcript_25087_70181_Confidence_0.000_Length_3616	Anisakis	KHN76663.1	72.3	894	0.0	2.43063622651562e-06	22.0412	Nr	KHN76663	ATP-binding cassette sub-family B member 9 [Toxocara canis]	849	INV	Abcb9	Toxocara canis	ATP-binding cassette sub-family B member 9
A0.A1.NODE_5724_length_2988_cov_567.725094_g2904_i0	Anisakis	XP_003139840.1	57.8	450	9.82e-157	2.43063622651562e-06	22.0412	Nr	XP_003139840	MOFRL family protein [Loa loa]	472	INV	NA	Loa loa	MOFRL family protein
A0.A1.NODE_3980_length_3506_cov_36.285548_g441_i2	Anisakis	CRZ24624.1	32.7	306	1.76e-23	2.43063622651562e-06	22.0412	Nr	CRZ24624	Bm10132 [Brugia malayi]	657	INV	Bm10132	Brugia malayi	Bm10132
A2.transcripts:Locus_16304_Transcript_4_8_Confidence_0.700_Length_3609	Anisakis	A0A3P6R222	67.0	761	1.66e-312	2.44796087891627e-06	22.0311	TrEMBL	A0A3P6R222_ANISI	NA	749	NA	ASIM_LOCUS14478	Anisakis simplex	DNA_MISMATCH_REPAIR_2 domain-containing protein
A1.A5.R3303119	Anisakis	A0A0M3K970	89.2	343	5.68e-210	2.44796087891627e-06	22.0299	TrEMBL	A0A0M3K970_ANISI	NA	345	NA	ASIM_LOCUS16918	Anisakis simplex	MYND-type domain-containing protein
A2.transcripts:Locus_9756_Transcript_9_18_Confidence_0.395_Length_980	Anisakis	KHN73650.1	46.3	337	2.15e-63	2.44796087891627e-06	22.0299	Nr	KHN73650	Transmembrane cell adhesion receptor mua-3 [Toxocara canis]	2434	INV	mua-3	Toxocara canis	Transmembrane cell adhesion receptor mua-3
A2.transcripts:Locus_3693_Transcript_9_16_Confidence_0.422_Length_1324	Anisakis	KHN86359.1	61.9	441	3.20e-124	2.44796087891627e-06	22.0299	Nr	KHN86359	Zinc finger protein [Toxocara canis]	497	INV	ZNF620	Toxocara canis	Zinc finger protein
A2.transcripts:Locus_11508_Transcript_12_18_Confidence_0.326_Length_3431	Anisakis	F1KVS0	84.0	451	6.15e-280	2.49056110765203e-06	22.0132	TrEMBL	F1KVS0_ASCSU	NA	533	NA	NA	Ascaris suum	Diacylglycerol kinase
A2.transcripts:Locus_160_Transcript_32_59_Confidence_0.326_Length_2313	Anisakis	KHN81056.1	62.2	225	7.33e-71	2.49056110765203e-06	22.0075	Nr	KHN81056	Nuclear pore complex protein Nup50 [Toxocara canis]	445	INV	Nup50	Toxocara canis	Nuclear pore complex protein Nup50
A2.transcripts:Locus_3_Transcript_21171_70181_Confidence_0.000_Length_3745	Anisakis	A0A3P6QHQ7	99.6	492	0.0	2.49056110765203e-06	22.0075	TrEMBL	A0A3P6QHQ7_ANISI	NA	547	NA	ASIM_LOCUS12821	Anisakis simplex	ATP synthase subunit alpha
A2.transcripts:Locus_1_Transcript_38053_107551_Confidence_0.000_Length_1883	Anisakis	A0A0M3J204	73.3	330	1.36e-144	2.49056110765203e-06	22.0075	TrEMBL	A0A0M3J204_ANISI	NA	625	NA	ASIM_LOCUS1437	Anisakis simplex	Protein tweety homolog
A2.transcripts:Locus_1454_Transcript_23_32_Confidence_0.556_Length_4064	Anisakis	A0A0M3JWL2	91.9	505	0.0	2.49056110765203e-06	22.0075	TrEMBL	A0A0M3JWL2_ANISI	NA	707	NA	ASIM_LOCUS12148	Anisakis simplex	Glutathione peroxidase
A2.transcripts:Locus_16267_Transcript_6_14_Confidence_0.471_Length_1536	Anisakis	F1KSF2	80.6	186	1.25e-90	2.50887213875034e-06	21.9939	TrEMBL	F1KSF2_ASCSU	NA	217	NA	NA	Ascaris suum	Endoplasmic reticulum transmembrane protein
A2.transcripts:Locus_1018_Transcript_2_11_Confidence_0.583_Length_4983	Anisakis	KHN81954.1	55.0	580	7.81e-139	2.50887213875034e-06	21.9939	Nr	KHN81954	Ubinuclein-2 [Toxocara canis]	1765	INV	Ubn2	Toxocara canis	Ubinuclein-2
A2.transcripts:Locus_2287_Transcript_11_17_Confidence_0.667_Length_3680	Anisakis	CRZ24223.1	36.7	237	2.37e-24	2.50887213875034e-06	21.9939	Nr	CRZ24223	Bm9834 [Brugia malayi]	221	INV	Bm9834	Brugia malayi	Bm9834
A2.transcripts:Locus_2781_Transcript_6_13_Confidence_0.464_Length_2919	Anisakis	F1LDA6	87.4	182	7.07e-107	2.50887213875034e-06	21.9939	TrEMBL	F1LDA6_ASCSU	Very-long-chain 3-oxoacyl-CoA synthase	297	NA	NA	Ascaris suum	Elongation of very long chain fatty acids protein
A2.transcripts:Locus_7043_Transcript_22_36_Confidence_0.238_Length_1559	Anisakis	A0A0M3JWF4	99.5	212	9.48e-152	2.50887213875034e-06	21.9939	TrEMBL	A0A0M3JWF4_ANISI	Polyglutamine-binding protein 1	313	NA	ASIM_LOCUS12074	Anisakis simplex	Polyglutamine tract-binding protein 1
A2.transcripts:Locus_163_Transcript_40_53_Confidence_0.089_Length_1218	Anisakis	A0A0M3K1S8	89.2	83	5.43e-36	2.52704997260114e-06	21.9872	TrEMBL	A0A0M3K1S8_ANISI	NA	507	NA	ASIM_LOCUS14243	Anisakis simplex	Tetraspanin
A2.transcripts:Locus_3_Transcript_57712_70181_Confidence_0.000_Length_8559	Anisakis	A0A0M3JYV6	99.4	362	2.67e-230	2.52704997260114e-06	21.9872	TrEMBL	A0A0M3JYV6_ANISI	26S proteasome regulatory subunit RPN9	401	NA	ASIM_LOCUS13077	Anisakis simplex	26S proteasome non-ATPase regulatory subunit 13
A2.transcripts:Locus_278_Transcript_81_468_Confidence_0.009_Length_3767	Anisakis	A0A0M3J1V2	99.2	248	6.31e-159	2.54122811952928e-06	21.9748	TrEMBL	A0A0M3J1V2_ANISI	NA	260	NA	NA	Anisakis simplex	C2 domain-containing protein
A2.transcripts:Locus_17684_Transcript_2_11_Confidence_0.455_Length_1758	Anisakis	KHN86076.1	84.5	245	2.60e-147	2.54122811952928e-06	21.9748	Nr	KHN86076	Chloride intracellular channel exl-1 [Toxocara canis]	253	INV	exl-1	Toxocara canis	Chloride intracellular channel exl-1
A2.transcripts:Locus_3_Transcript_11504_70181_Confidence_0.000_Length_1543	Anisakis	A1IKL3.1	73.2	71	1.45e-35	2.54122811952928e-06	21.9748	Swiss-Prot	ANIS6_ANISI	RecName: Full=Chymotrypsin inhibitor Ani s 6; AltName: Allergen=Ani s 6; Flags: Precursor	84	INV	NA	Anisakis simplex	Chymotrypsin inhibitor Ani s 6
A2.transcripts:Locus_1_Transcript_66415_107551_Confidence_0.000_Length_4731	Anisakis	A0A0M3I1I7	54.0	715	4.20e-262	2.54122811952928e-06	21.9748	TrEMBL	A0A0M3I1I7_ASCLU	NA	734	NA	NA	Ascaris lumbricoides	Carn_acyltransf domain-containing protein
A2.transcripts:Locus_113_Transcript_13_30_Confidence_0.450_Length_3100	Anisakis	CDJ94607.1	70.6	204	5.15e-94	2.54122811952928e-06	21.9748	Nr	CDJ94607	Phosphoglycerate mutase domain containing protein [Haemonchus contortus]	278	INV	NA	Haemonchus contortus	Phosphoglycerate mutase domain containing protein
A0.A1.NODE_9063_length_2378_cov_1428.749459_g367_i5	Anisakis	A0A0M3K1X5	96.5	317	1.03e-147	2.54122811952928e-06	21.9748	TrEMBL	A0A0M3K1X5_ANISI	NA	618	NA	NA	Anisakis simplex	Moesin/ezrin/radixin homolog 1
A2.transcripts:Locus_1082_Transcript_43_72_Confidence_0.252_Length_3294	Anisakis	KHN74767.1	69.5	532	7.72e-247	2.55199312303908e-06	21.9692	Nr	KHN74767	Pre-rRNA-processing protein TSR1 -like protein [Toxocara canis]	825	INV	tag-151	Toxocara canis	Pre-rRNA-processing protein TSR1 -like protein
A2.transcripts:Locus_756_Transcript_51_94_Confidence_0.137_Length_3144	Anisakis	KHN77498.1	76.2	151	9.05e-62	2.55199312303908e-06	21.9692	Nr	KHN77498	Protein SON [Toxocara canis]	853	INV	Son	Toxocara canis	Protein SON
A2.transcripts:Locus_450_Transcript_175_407_Confidence_0.012_Length_5636	Anisakis	KHN86200.1	77.4	199	3.27e-92	2.58330911253321e-06	21.9544	Nr	KHN86200	Putative uncharacterized transposon-derived protein F52C9.6, partial [Toxocara canis]	246	INV	F52C9.6	Toxocara canis	putative uncharacterized transposon-derived protein F52C9.6
A2.transcripts:Locus_3_Transcript_41279_70181_Confidence_0.000_Length_3250	Anisakis	A0A0M3JYT7	67.2	406	6.90e-166	2.58330911253321e-06	21.9544	TrEMBL	A0A0M3JYT7_ANISI	NA	461	NA	ASIM_LOCUS13056	Anisakis simplex	1-alkyl-2-acetylglycerophosphocholine esterase
A2.transcripts:Locus_3_Transcript_62482_70181_Confidence_0.000_Length_4805	Anisakis	A0A0M3JVK5	68.7	508	3.84e-202	2.58330911253321e-06	21.9544	TrEMBL	A0A0M3JVK5_ANISI	NA	430	NA	ASIM_LOCUS11726	Anisakis simplex	Ribosome biogenesis protein NSA2 homolog
A2.transcripts:Locus_1701_Transcript_25_49_Confidence_0.153_Length_2828	Anisakis	KHN78555.1	84.1	145	1.02e-71	2.58330911253321e-06	21.9544	Nr	KHN78555	Importin subunit alpha-2 [Toxocara canis]	846	INV	ima-2	Toxocara canis	Importin subunit alpha-2
A2.transcripts:Locus_500_Transcript_23_40_Confidence_0.615_Length_3573	Anisakis	A0A3P6U148	42.7	255	6.06e-42	2.61580932254454e-06	21.9413	TrEMBL	A0A3P6U148_LITSI	NA	405	NA	NLS_LOCUS6825	Litomosoides sigmodontis	GRIP domain-containing protein
A2.transcripts:Locus_1_Transcript_23042_107551_Confidence_0.000_Length_2398	Anisakis	A0A0B2VX30	93.8	435	8.83e-282	2.61580932254454e-06	21.9413	TrEMBL	A0A0B2VX30_TOXCA	NA	461	NA	Tcan_08628	Toxocara canis	KH domain-containing protein
A0.A1.NODE_5540_length_3030_cov_45.314546_g2824_i0	Anisakis	A0A0M3JU43	45.9	455	1.80e-96	2.61580932254454e-06	21.9413	TrEMBL	A0A0M3JU43_ANISI	NA	361	NA	ASIM_LOCUS11146	Anisakis simplex	Beta_elim_lyase domain-containing protein
A2.transcripts:Locus_1_Transcript_13033_107551_Confidence_0.000_Length_1288	Anisakis	A0A0B2VFK7	88.1	109	3.30e-63	2.62724267658214e-06	21.9348	TrEMBL	A0A0B2VFK7_TOXCA	NA	172	NA	cyn-3	Toxocara canis	Peptidyl-prolyl cis-trans isomerase
A2.transcripts:Locus_405_Transcript_47_108_Confidence_0.080_Length_5534	Anisakis	ALF38191.1	94.4	734	0.0	2.62724267658214e-06	21.9348	Nr	ALF38191	nuclear hormone receptor, partial [Anisakis simplex]	734	INV	NHR48	Anisakis simplex	nuclear hormone receptor
A2.transcripts:Locus_3_Transcript_68395_70181_Confidence_0.000_Length_4730	Anisakis	KHN81782.1	87.8	123	5.05e-68	2.62724267658214e-06	21.9348	Nr	KHN81782	Transthyretin-like protein 46 [Toxocara canis]	123	INV	ttr-46	Toxocara canis	Transthyretin-like protein 46
A2.transcripts:Locus_221_Transcript_73_113_Confidence_0.388_Length_4094	Anisakis	AHY24647.1	95.0	887	0.0	2.63150392293304e-06	21.9291	Nr	AHY24647	glycogen phosphorylase [Anisakis simplex]	863	INV	GP	Anisakis simplex	glycogen phosphorylase
A2.transcripts:Locus_3_Transcript_25571_70181_Confidence_0.000_Length_3566	Anisakis	KHN82457.1	51.9	591	2.16e-181	2.63150392293304e-06	21.9291	Nr	KHN82457	Sphingosine-1-phosphate lyase [Toxocara canis]	580	INV	spl-1	Toxocara canis	Sphingosine-1-phosphate lyase
A2.transcripts:Locus_670_Transcript_73_78_Confidence_0.125_Length_3620	Anisakis	A0A158PNB6	91.5	343	8.61e-179	2.66430665260323e-06	21.9144	TrEMBL	A0A158PNB6_ANISI	NA	502	NA	ASIM_LOCUS11056	Anisakis simplex	Frizzled-4
A2.transcripts:Locus_18469_Transcript_11_28_Confidence_0.548_Length_2533	Anisakis	A0A0M3J342	96.4	420	1.75e-256	2.66430665260323e-06	21.9144	TrEMBL	A0A0M3J342_ANISI	NA	482	NA	ASIM_LOCUS1825	Anisakis simplex	MADF domain-containing protein
A2.transcripts:Locus_19907_Transcript_11_38_Confidence_0.220_Length_580	Anisakis	A0A0M3J170	78.8	85	6.80e-34	2.67683126891225e-06	21.9085	TrEMBL	A0A0M3J170_ANISI	NA	350	NA	ASIM_LOCUS1153	Anisakis simplex	Epimerase domain-containing protein
A1.A4.J2367513	Anisakis	KHN78878.1	70.5	88	1.42e-29	2.67683126891225e-06	21.9085	Nr	KHN78878	PDZ domain-containing protein 2 [Toxocara canis]	1134	INV	Pdzd2	Toxocara canis	PDZ domain-containing protein 2
A2.transcripts:Locus_23206_Transcript_7_13_Confidence_0.526_Length_1671	Anisakis	KHN74778.1	75.1	289	9.57e-116	2.71404732283571e-06	21.8929	Nr	KHN74778	Hemicentin-1 [Toxocara canis]	1079	INV	HMCN1	Toxocara canis	Hemicentin-1
A2.transcripts:Locus_1_Transcript_37662_107551_Confidence_0.000_Length_4163	Anisakis	A0A0M3IZF7	91.6	439	1.58e-294	2.71404732283571e-06	21.8929	TrEMBL	A0A0M3IZF7_ANISI	NA	621	NA	ASIM_LOCUS540	Anisakis simplex	Phosphoenolpyruvate carboxykinase (GTP)
A2.transcripts:Locus_3_Transcript_42093_70181_Confidence_0.000_Length_3922	Anisakis	KHN86962.1	68.3	618	1.20e-292	2.71404732283571e-06	21.8929	Nr	KHN86962	Very long-chain specific acyl-CoA dehydrogenase, mitochondrial [Toxocara canis]	626	INV	Acadvl	Toxocara canis	Very long-chain specific acyl-CoA dehydrogenase, mitochondrial
A2.transcripts:Locus_1333_Transcript_17_27_Confidence_0.643_Length_2001	Anisakis	A0A3P6R124	90.6	417	2.74e-188	2.71404732283571e-06	21.8929	TrEMBL	A0A3P6R124_ANISI	NA	412	NA	ASIM_LOCUS15952	Anisakis simplex	Fork-head domain-containing protein
A2.transcripts:Locus_909_Transcript_12_20_Confidence_0.284_Length_729	Anisakis	CDP93414.1	41.9	93	4.15e-15	2.71404732283571e-06	21.8929	Nr	CDP93414	Bm14680 [Brugia malayi]	106	INV	Bm14680	Brugia malayi	Bm14680
A2.transcripts:Locus_1_Transcript_59141_107551_Confidence_0.000_Length_4647	Anisakis	A0A0M3J287	89.4	395	9.05e-171	2.72389099361785e-06	21.8869	TrEMBL	A0A0M3J287_ANISI	NA	400	NA	ASIM_LOCUS1520	Anisakis simplex	SH3 domain-containing protein
A0.A4.NODE_6_length_11715_cov_258.490577_g1_i3	Anisakis	KHN83973.1	53.6	1294	0.0	2.72389099361785e-06	21.8869	Nr	KHN83973	Contactin-associated protein-like 5 [Toxocara canis]	1105	INV	CNTNAP5	Toxocara canis	Contactin-associated protein-like 5
A0.A1.NODE_1825_length_4584_cov_131.325880_g991_i0	Anisakis	KHN85423.1	64.4	595	1.61e-217	2.72389099361785e-06	21.8869	Nr	KHN85423	Hamartin [Toxocara canis]	1238	INV	TSC1	Toxocara canis	Hamartin
A2.transcripts:Locus_3_Transcript_9089_70181_Confidence_0.000_Length_1825	Anisakis	A0A0M3I3Q6	95.7	46	1.40e-17	2.76270516757064e-06	21.871	TrEMBL	A0A0M3I3Q6_ASCLU	NA	298	NA	NA	Ascaris lumbricoides	VOC domain-containing protein
A2.transcripts:Locus_20151_Transcript_4_24_Confidence_0.375_Length_1401	Anisakis	KHN88776.1	89.7	282	2.87e-184	2.76270516757064e-06	21.871	Nr	KHN88776	Putative tricarboxylate transport protein, mitochondrial [Toxocara canis]	324	INV	K11H3.3	Toxocara canis	putative tricarboxylate transport protein, mitochondrial
A2.transcripts:Locus_712_Transcript_135_150_Confidence_0.054_Length_3082	Anisakis	KHN88722.1	92.9	112	1.56e-59	2.76270516757064e-06	21.871	Nr	KHN88722	putative trafficking protein particle complex subunit 13 -like protein [Toxocara canis]	321	INV	C56C10.7	Toxocara canis	putative trafficking protein particle complex subunit 13 -like protein
A1.A1.R3312454	Anisakis	A0A0M3JXW2	96.3	698	0.0	2.76270516757064e-06	21.871	TrEMBL	A0A0M3JXW2_ANISI	NA	891	NA	NA	Anisakis simplex	SEFIR domain-containing protein
A0.A6.NODE_5350_length_2344_cov_147.705832_g3208_i0	Anisakis	P62299.2	75.4	138	4.25e-58	2.76270516757064e-06	21.871	Swiss-Prot	RS13_BRUPA	RecName: Full=40S ribosomal protein S13; AltName: Full=17.4K protein	151	INV	NA	Brugia pahangi	40S ribosomal protein S13
A0.A5.NODE_5888_length_2795_cov_284.792515_g2577_i1	Anisakis	KHN85460.1	98.5	325	5.33e-228	2.76270516757064e-06	21.871	Nr	KHN85460	Casein kinase I isoform alpha [Toxocara canis]	331	INV	kin-19	Toxocara canis	Casein kinase I isoform alpha
A2.transcripts:Locus_1_Transcript_43575_107551_Confidence_0.000_Length_1219	Anisakis	A0A0M3KBB4	92.8	167	2.55e-111	2.7676844986835e-06	21.8656	TrEMBL	A0A0M3KBB4_ANISI	Non-canonical purine NTP pyrophosphatase	214	NA	ASIM_LOCUS17662	Anisakis simplex	Inosine triphosphate pyrophosphatase
A0.A5.NODE_437_length_6149_cov_51.668195_g224_i0	Anisakis	A0A0M3IY10	99.6	462	0.0	2.7676844986835e-06	21.8656	TrEMBL	A0A0M3IY10_ANISI	NA	466	NA	ASIM_LOCUS37	Anisakis simplex	Bis(5'-adenosyl)-triphosphatase
A1.A6.R983931	Anisakis	CDP98461.1	50.0	138	1.68e-41	2.83768877090595e-06	21.8418	Nr	CDP98461	Bm10515 [Brugia malayi]	147	INV	Bm10515	Brugia malayi	Bm10515
A0.A1.NODE_7455_length_2635_cov_128.276090_g3669_i0	Anisakis	A0A0M3JUW9	95.2	435	1.53e-269	2.83768877090595e-06	21.8418	TrEMBL	A0A0M3JUW9_ANISI	Leucyl-tRNA synthetase	1479	NA	ASIM_LOCUS11463	Anisakis simplex	Exocyst complex component 8
A2.transcripts:Locus_31871_Transcript_35_68_Confidence_0.240_Length_1896	Anisakis	A0A0M3HMH5	78.9	109	3.66e-39	2.83768877090595e-06	21.8418	TrEMBL	A0A0M3HMH5_ASCLU	NA	632	NA	NA	Ascaris lumbricoides	tRNA-5-taurinomethyluridine 2-sulfurtransferase
A2.transcripts:Locus_16302_Transcript_72_74_Confidence_0.386_Length_4266	Anisakis	A0A0M3K2Y0	99.2	645	0.0	2.83768877090595e-06	21.8418	TrEMBL	A0A0M3K2Y0_ANISI	Alpha-trehalose glucohydrolase	910	NA	NA	Anisakis simplex	Trehalase
A2.transcripts:Locus_1_Transcript_57759_107551_Confidence_0.000_Length_1844	Anisakis	XP_020305769.1	45.2	398	1.26e-64	2.89431991941031e-06	21.8207	Nr	XP_020305769	rap guanine nucleotide exchange factor 1 [Loa loa]	1027	INV	NA	Loa loa	rap guanine nucleotide exchange factor 1
A2.transcripts:Locus_9268_Transcript_23_36_Confidence_0.167_Length_2066	Anisakis	KHN83207.1	59.5	185	4.43e-64	2.89431991941031e-06	21.8207	Nr	KHN83207	Dehydrogenase/reductase SDR family member 4 [Toxocara canis]	520	INV	DHRS4	Toxocara canis	Dehydrogenase/reductase SDR family member 4
A2.transcripts:Locus_15857_Transcript_53_55_Confidence_0.541_Length_3614	Anisakis	KHN77197.1	59.3	923	0.0	2.89431991941031e-06	21.8207	Nr	KHN77197	Krev interaction trapped protein 1 [Toxocara canis]	775	INV	KRIT1	Toxocara canis	Krev interaction trapped protein 1
A2.transcripts:Locus_2076_Transcript_4_5_Confidence_0.667_Length_3344	Anisakis	A0A0M3K3G2	72.6	764	1.55e-314	2.92883553672615e-06	21.8035	TrEMBL	A0A0M3K3G2_ANISI	NA	721	NA	ASIM_LOCUS14910	Anisakis simplex	Endo/exonuclease/phosphatase domain-containing protein
A2.transcripts:Locus_1722_Transcript_41_44_Confidence_0.115_Length_1017	Anisakis	KHN72521.1	47.4	228	2.98e-58	2.92883553672615e-06	21.8035	Nr	KHN72521	Tubulin-specific chaperone B [Toxocara canis]	233	INV	F53F4.3	Toxocara canis	Tubulin-specific chaperone B
A0.A1.NODE_10494_length_2176_cov_25.623992_g4973_i0	Anisakis	A0A158PPJ3	93.8	176	6.95e-95	2.92883553672615e-06	21.8035	TrEMBL	A0A158PPJ3_ANISI	NA	726	NA	ASIM_LOCUS14254	Anisakis simplex	PlsC domain-containing protein
A2.transcripts:Locus_6089_Transcript_32_71_Confidence_0.190_Length_3885	Anisakis	A0A158PPD6	84.0	625	0.0	2.92883553672615e-06	21.8035	TrEMBL	A0A158PPD6_ANISI	Geranylgeranyl transferase type II subunit alpha	552	NA	ASIM_LOCUS13675	Anisakis simplex	Geranylgeranyl transferase type-2 subunit alpha
A2.transcripts:Locus_3767_Transcript_19_33_Confidence_0.147_Length_1095	Anisakis	A0A0M3I282	80.7	161	1.55e-92	2.92883553672615e-06	21.7986	TrEMBL	A0A0M3I282_ASCLU	NA	351	NA	NA	Ascaris lumbricoides	Metallophos domain-containing protein
A2.transcripts:Locus_435_Transcript_51_79_Confidence_0.303_Length_7536	Anisakis	CDJ94488.1	40.7	1076	1.31e-260	2.92883553672615e-06	21.7986	Nr	CDJ94488	CRE-LPR-2 protein [Haemonchus contortus]	1035	INV	NA	Haemonchus contortus	CRE-LPR-2 protein
A2.transcripts:Locus_4001_Transcript_6_7_Confidence_0.533_Length_2522	Anisakis	A0A0M3JRA2	100	218	6.78e-134	2.92883553672615e-06	21.7986	TrEMBL	A0A0M3JRA2_ANISI	NA	383	NA	ASIM_LOCUS9976	Anisakis simplex	Pyruvate dehydrogenase E1 component subunit beta
A2.transcripts:Locus_3603_Transcript_23_83_Confidence_0.061_Length_2259	Anisakis	KHN75658.1	82.2	398	1.64e-229	2.92883553672615e-06	21.7986	Nr	KHN75658	Biotin--protein ligase [Toxocara canis]	1485	INV	HLCS	Toxocara canis	Biotin--protein ligase
A2.transcripts:Locus_4_Transcript_19140_21802_Confidence_0.000_Length_3277	Anisakis	A0A0M3JW53	94.8	561	0.0	2.92883553672615e-06	21.7986	TrEMBL	A0A0M3JW53_ANISI	NA	1384	NA	ASIM_LOCUS11962	Anisakis simplex	GATOR complex protein WDR24
A2.transcripts:Locus_3233_Transcript_10_36_Confidence_0.569_Length_2545	Anisakis	A0A0M3K411	99.2	365	1.84e-249	2.92883553672615e-06	21.7986	TrEMBL	A0A0M3K411_ANISI	NA	398	NA	ASIM_LOCUS15109	Anisakis simplex	AH domain-containing protein
A2.transcripts:Locus_6117_Transcript_22_40_Confidence_0.478_Length_3272	Anisakis	KHN77448.1	70.8	710	0.0	3.10720640910436e-06	21.7485	Nr	KHN77448	Neprilysin-1 [Toxocara canis]	800	INV	nep-1	Toxocara canis	Neprilysin-1
A2.transcripts:Locus_1610_Transcript_103_120_Confidence_0.142_Length_4149	Anisakis	A0A0B2W1D5	66.4	456	6.53e-213	3.10720640910436e-06	21.7485	TrEMBL	A0A0B2W1D5_TOXCA	NA	606	NA	Fmo5	Toxocara canis	Flavin-containing monooxygenase
A2.transcripts:Locus_707_Transcript_63_69_Confidence_0.176_Length_1714	Anisakis	A0A0K0ECI7	31.9	304	6.20e-43	3.10720640910436e-06	21.7485	TrEMBL	A0A0K0ECI7_STRER	NA	403	NA	NA	Strongyloides stercoralis	Saposin B-type domain-containing protein
A2.transcripts:Locus_2653_Transcript_2_5_Confidence_0.400_Length_736	Anisakis	KHN74766.1	67.7	223	1.94e-107	3.10720640910436e-06	21.7485	Nr	KHN74766	Cyclin-dependent kinase 4 [Toxocara canis]	320	INV	cdk4	Toxocara canis	Cyclin-dependent kinase 4
A2.transcripts:Locus_4775_Transcript_1_17_Confidence_0.120_Length_642	Anisakis	A0A1L3GVW5	98.3	118	1.78e-73	3.10720640910436e-06	21.7485	TrEMBL	A0A1L3GVW5_ANISI	NA	399	NA	NA	Anisakis simplex	Arginine kinase
A2.transcripts:Locus_3_Transcript_30141_70181_Confidence_0.000_Length_4292	Anisakis	CDJ94793.1	46.6	388	6.37e-115	3.10720640910436e-06	21.7485	Nr	CDJ94793	Protein Y45G5AM.6 [Haemonchus contortus]	384	INV	NA	Haemonchus contortus	Protein Y45G5AM.6
A2.transcripts:Locus_1_Transcript_81092_107551_Confidence_0.000_Length_1810	Anisakis	A0A0M3K5P6	96.3	437	3.88e-289	5.09754170843542e-06	21.3641	TrEMBL	A0A0M3K5P6_ANISI	NA	436	NA	ASIM_LOCUS15694	Anisakis simplex	PPM-type phosphatase domain-containing protein
A2.transcripts:Locus_17105_Transcript_9_15_Confidence_0.559_Length_3547	Anisakis	A0A0M3JT07	97.8	930	0.0	5.09754170843542e-06	21.3641	TrEMBL	A0A0M3JT07_ANISI	NA	912	NA	ASIM_LOCUS10696	Anisakis simplex	Staphylococcal nuclease domain-containing protein
A0.A5.NODE_2435_length_3905_cov_129.424392_g1237_i0	Anisakis	A0A158PPR6	87.0	1228	0.0	5.09754170843542e-06	21.3641	TrEMBL	A0A158PPR6_ANISI	NA	1112	NA	ASIM_LOCUS14744	Anisakis simplex	Rab-GAP TBC domain-containing protein
A2.transcripts:Locus_1863_Transcript_21_32_Confidence_0.435_Length_2869	Anisakis	KHN74880.1	69.0	574	9.62e-252	5.09754170843542e-06	21.3641	Nr	KHN74880	MFS-type transporter SLC18B1 [Toxocara canis]	661	INV	Slc18b1	Toxocara canis	MFS-type transporter SLC18B1
A2.transcripts:Locus_10749_Transcript_63_97_Confidence_0.110_Length_6281	Anisakis	KHN81833.1	60.9	1569	0.0	5.09754170843542e-06	21.3641	Nr	KHN81833	Transcription factor HIVEP3 [Toxocara canis]	1609	INV	HIVEP3	Toxocara canis	Transcription factor HIVEP3
A2.transcripts:Locus_16081_Transcript_2_9_Confidence_0.385_Length_2133	Anisakis	A0A0M3HH64	59.4	160	3.70e-58	1.44412311840486e-05	20.506	TrEMBL	A0A0M3HH64_ASCLU	NA	161	NA	NA	Ascaris lumbricoides	Dolichol kinase
A2.transcripts:Locus_1_Transcript_72307_107551_Confidence_0.000_Length_4372	Anisakis	A0A0M3K1R0	94.3	247	6.18e-139	1.44412311840486e-05	20.506	TrEMBL	A0A0M3K1R0_ANISI	NA	247	NA	ASIM_LOCUS14224	Anisakis simplex	V-SNARE coiled-coil homology domain-containing protein
A2.transcripts:Locus_1460_Transcript_7_16_Confidence_0.552_Length_3980	Anisakis	KHN85016.1	99.1	462	0.0	1.44412311840486e-05	20.506	Nr	KHN85016	Regulator of G-protein signaling 7 [Toxocara canis]	463	INV	RGS7	Toxocara canis	Regulator of G-protein signaling 7
A2.transcripts:Locus_3_Transcript_57867_70181_Confidence_0.000_Length_3044	Anisakis	A0A0M3K3M1	99.9	684	0.0	1.44412311840486e-05	20.506	TrEMBL	A0A0M3K3M1_ANISI	NA	719	NA	ASIM_LOCUS14964	Anisakis simplex	Dynamin-1-like protein
A2.transcripts:Locus_16021_Transcript_9_29_Confidence_0.256_Length_713	Anisakis	CDP93424.1	86.7	113	8.31e-59	1.44412311840486e-05	20.506	Nr	CDP93424	BMA-UNC-69, isoform e [Brugia malayi]	122	INV	Bma-unc-69	Brugia malayi	BMA-UNC-69, isoform e
A0.A1.NODE_6445_length_2830_cov_55.239957_g381_i2	Anisakis	A0A3P7IM14	64.2	335	3.42e-148	1.44412311840486e-05	20.506	TrEMBL	A0A3P7IM14_TOXCA	NA	356	NA	TCNE_LOCUS16381	Toxocara canis	Acyl_transf_3 domain-containing protein
A2.transcripts:Locus_1482_Transcript_41_72_Confidence_0.169_Length_4358	Anisakis	KHN79567.1	75.8	327	2.25e-168	1.44412311840486e-05	20.506	Nr	KHN79567	Putative 1-acyl-sn-glycerol-3-phosphate acyltransferase acl-12 [Toxocara canis]	398	INV	acl-12	Toxocara canis	putative 1-acyl-sn-glycerol-3-phosphate acyltransferase acl-12
A2.transcripts:Locus_4_Transcript_457_510_Confidence_0.020_Length_3208	Anisakis	A0A3P7FK88	56.3	112	3.00e-27	1.14692080306345e-09	18.0945	TrEMBL	A0A3P7FK88_WUCBA	NA	156	NA	WBA_LOCUS4564	Wuchereria bancrofti	Col_cuticle_N domain-containing protein
A2.transcripts:Locus_19_Transcript_8_25_Confidence_0.480_Length_1637	Anisakis	A0A0M3K6N2	100	269	1.24e-65	1.03688047306112e-27	17.8573	TrEMBL	A0A0M3K6N2_ANISI	NA	269	NA	ASIM_LOCUS16030	Anisakis simplex	Col_cuticle_N domain-containing protein
A2.transcripts:Locus_1198_Transcript_7_14_Confidence_0.474_Length_3260	Anisakis	A0A0B2VFD6	73.5	427	5.31e-227	1.62377622165853e-16	17.1872	TrEMBL	A0A0B2VFD6_TOXCA	NA	450	NA	Tcan_13196	Toxocara canis	Neur_chan_LBD domain-containing protein
A2.transcripts:Locus_2821_Transcript_7_11_Confidence_0.588_Length_1902	Anisakis	KJH42423.1	68.9	193	9.37e-61	1.61450803907495e-22	16.7456	Nr	KJH42423	nematode cuticle collagen domain protein [Dictyocaulus viviparus]	332	INV	NA	Dictyocaulus viviparus	nematode cuticle collagen domain protein
A2.transcripts:Locus_93_Transcript_20_25_Confidence_0.467_Length_3584	Anisakis	A0A0M3K515	83.8	1035	0.0	1.5855472368096e-19	16.71	TrEMBL	A0A0M3K515_ANISI	NA	935	NA	ASIM_LOCUS15463	Anisakis simplex	BPI2 domain-containing protein
A2.transcripts:Locus_16476_Transcript_25_36_Confidence_0.236_Length_1030	Anisakis	XP_001901765.1	42.6	108	8.78e-07	6.68815791646172e-08	15.5538	Nr	XP_001901765	epicuticlin [Brugia malayi]	187	INV	NA	Brugia malayi	epicuticlin
A2.transcripts:Locus_4_Transcript_176_510_Confidence_0.009_Length_495	Anisakis	KHN88202.1	74.7	95	3.10e-15	1.78937747893721e-07	15.2153	Nr	KHN88202	Cuticle collagen 40 [Toxocara canis]	312	INV	col-40	Toxocara canis	Cuticle collagen 40
A2.transcripts:Locus_93_Transcript_19_25_Confidence_0.467_Length_3843	Anisakis	A0A0M3K515	89.4	861	0.0	7.63436988082947e-17	15.1508	TrEMBL	A0A0M3K515_ANISI	NA	935	NA	ASIM_LOCUS15463	Anisakis simplex	BPI2 domain-containing protein
A2.transcripts:Locus_524_Transcript_7_9_Confidence_0.400_Length_1215	Anisakis	A0A0M3KCL0	91.0	223	6.24e-24	3.67583136437352e-18	14.8157	TrEMBL	A0A0M3KCL0_ANISI	NA	327	NA	ASIM_LOCUS18106	Anisakis simplex	Col_cuticle_N domain-containing protein
A2.transcripts:Locus_1_Transcript_20962_107551_Confidence_0.000_Length_659	Anisakis	KHN73958.1	88.2	93	2.58e-45	5.68194421238391e-21	14.7162	Nr	KHN73958	Acetyl-CoA acetyltransferase A, mitochondrial [Toxocara canis]	811	INV	acat1-a	Toxocara canis	Acetyl-CoA acetyltransferase A, mitochondrial
A2.transcripts:Locus_57_Transcript_12_13_Confidence_0.435_Length_1380	Anisakis	A0A0N5CUS3	50.2	219	3.96e-52	3.60209107951103e-11	14.6701	TrEMBL	A0A0N5CUS3_THECL	NA	310	NA	TCLT_LOCUS4017	Thelazia callipaeda	Col_cuticle_N domain-containing protein
A0.A2.NODE_590_length_2082_cov_8637.171456_g469_i0	Anisakis	J9DQW0	66.7	54	2.06e-14	9.30461086655721e-16	14.2181	TrEMBL	J9DQW0_WUCBA	NA	54	NA	WUBG_17147	Wuchereria bancrofti	Col_cuticle_N domain-containing protein
A0.A4.NODE_21013_length_829_cov_30.852792_g10379_i0	Anisakis	CAC38979.1	43.0	242	3.77e-30	1.14146861815861e-08	14.2125	Nr	CAC38979	epicuticlin, partial [Ascaris suum]	318	INV	epicut1	Ascaris suum	epicuticlin
A2.transcripts:Locus_806_Transcript_14_15_Confidence_0.308_Length_1810	Anisakis	KHN73564.1	58.3	84	5.49e-19	6.19967078389085e-12	13.6843	Nr	KHN73564	Cuticle collagen sqt-1 [Toxocara canis]	282	INV	sqt-1	Toxocara canis	Cuticle collagen sqt-1
A2.transcripts:Locus_4_Transcript_296_510_Confidence_0.007_Length_1852	Anisakis	KHN80325.1	60.4	222	5.95e-47	9.28466968468457e-07	13.4716	Nr	KHN80325	Cuticle collagen 13 [Toxocara canis]	353	INV	col-13	Toxocara canis	Cuticle collagen 13
A2.transcripts:Locus_26769_Transcript_45_56_Confidence_0.253_Length_3172	Anisakis	KHN73447.1	91.1	372	1.04e-244	0.00639059022015996	13.442	Nr	KHN73447	Peroxidase mlt-7 [Toxocara canis]	702	INV	mlt-7	Toxocara canis	Peroxidase mlt-7
A2.transcripts:Locus_4_Transcript_139_510_Confidence_0.032_Length_1105	Anisakis	A0A0M3J0F9	98.4	61	4.82e-30	2.59947279974435e-11	13.3034	TrEMBL	A0A0M3J0F9_ANISI	NA	210	NA	ASIM_LOCUS892	Anisakis simplex	Col_cuticle_N domain-containing protein
A0.A5.NODE_22538_length_1121_cov_7.558442_g9582_i0	Anisakis	A0A0B2VFD6	72.1	272	1.43e-142	0.00661988911332161	13.2139	TrEMBL	A0A0B2VFD6_TOXCA	NA	450	NA	Tcan_13196	Toxocara canis	Neur_chan_LBD domain-containing protein
A2.transcripts:Locus_3_Transcript_21323_70181_Confidence_0.000_Length_3128	Anisakis	KHN74592.1	57.3	620	2.69e-221	0.00678573811853331	13.1902	Nr	KHN74592	Putative serine protease K12H4.7, partial [Toxocara canis]	1661	INV	K12H4.7	Toxocara canis	putative serine protease K12H4.7
A2.transcripts:Locus_10797_Transcript_15_40_Confidence_0.370_Length_1961	Anisakis	KHN84575.1	69.7	366	2.37e-192	9.86514202108327e-06	13.1774	Nr	KHN84575	Putative tyrosinase-like protein tyr-1 [Toxocara canis]	556	INV	tyr-1	Toxocara canis	putative tyrosinase-like protein tyr-1
A2.transcripts:Locus_14315_Transcript_11_14_Confidence_0.577_Length_2134	Anisakis	A0A0M3IYS1	100	540	0.0	1.11941389113042e-12	13.0927	TrEMBL	A0A0M3IYS1_ANISI	NA	543	NA	ASIM_LOCUS304	Anisakis simplex	Metalloendopeptidase
A2.transcripts:Locus_1_Transcript_14750_107551_Confidence_0.000_Length_1913	Anisakis	A0A0B2VFZ0	94.6	111	2.63e-63	6.66809975084299e-15	13.0517	TrEMBL	A0A0B2VFZ0_TOXCA	NA	247	NA	tpi-1	Toxocara canis	Triosephosphate isomerase
A2.transcripts:Locus_4_Transcript_121_510_Confidence_0.012_Length_2112	Anisakis	A0A0M3JR55	98.4	125	3.64e-51	4.2945870578146e-09	13.0296	TrEMBL	A0A0M3JR55_ANISI	NA	313	NA	ASIM_LOCUS9922	Anisakis simplex	Col_cuticle_N domain-containing protein
A2.transcripts:Locus_275_Transcript_19_29_Confidence_0.296_Length_1909	Anisakis	KHN77544.1	69.3	306	2.80e-147	0.00819858239089511	13.0174	Nr	KHN77544	Putative serine protease F56F10.1 [Toxocara canis]	986	INV	F56F10.1	Toxocara canis	putative serine protease F56F10.1
A2.transcripts:Locus_1985_Transcript_22_46_Confidence_0.136_Length_1378	Anisakis	CDQ05675.1	64.8	352	8.66e-123	7.76634825574455e-16	13.0108	Nr	CDQ05675	Bm4040 [Brugia malayi]	325	INV	Bm4040	Brugia malayi	Bm4040
A2.transcripts:Locus_8584_Transcript_32_35_Confidence_0.306_Length_1708	Anisakis	A0A0M3K708	92.3	182	4.06e-91	4.5507153117013e-08	12.9591	TrEMBL	A0A0M3K708_ANISI	NA	310	NA	ASIM_LOCUS16156	Anisakis simplex	Col_cuticle_N domain-containing protein
A2.transcripts:Locus_3_Transcript_15905_70181_Confidence_0.000_Length_1182	Anisakis	KHN86693.1	65.1	232	1.46e-105	0.00261051723571333	12.9589	Nr	KHN86693	BTB/POZ domain-containing adapter for CUL3-mediated RhoA degradation protein 3 [Toxocara canis]	236	INV	KCTD10	Toxocara canis	BTB/POZ domain-containing adapter for CUL3-mediated RhoA degradation protein 3
A2.transcripts:Locus_960_Transcript_32_47_Confidence_0.352_Length_1780	Anisakis	A0A3P7IBV4	76.9	337	1.93e-194	3.54057445645229e-10	12.9528	TrEMBL	A0A3P7IBV4_TOXCA	NA	518	NA	TCNE_LOCUS13697	Toxocara canis	Metalloendopeptidase
A1.A2.R682510	Anisakis	A0A0B2VA24	65.8	155	1.71e-60	4.65316907184112e-26	12.9484	TrEMBL	A0A0B2VA24_TOXCA	NA	570	NA	Tcan_02785	Toxocara canis	DB domain-containing protein
A2.transcripts:Locus_397_Transcript_63_193_Confidence_0.032_Length_2318	Anisakis	KHN71938.1	75.8	636	0.0	0.00807619805777885	12.9188	Nr	KHN71938	Gamma-glutamyltranspeptidase 1 [Toxocara canis]	1038	INV	Ggt1	Toxocara canis	Gamma-glutamyltranspeptidase 1
A2.transcripts:Locus_3_Transcript_36764_70181_Confidence_0.000_Length_7942	Anisakis	KHN73857.1	61.0	921	6.59e-306	0.00805965606759688	12.9015	Nr	KHN73857	Intermediate filament protein A, partial [Toxocara canis]	636	INV	NA	Toxocara canis	Intermediate filament protein A
A0.A2.NODE_3473_length_1008_cov_71.501532_g2957_i0	Anisakis	A0A0M3K6Y3	93.5	153	5.82e-89	3.1049725226211e-06	12.8828	TrEMBL	A0A0M3K6Y3_ANISI	NA	293	NA	ASIM_LOCUS16131	Anisakis simplex	Col_cuticle_N domain-containing protein
A2.transcripts:Locus_4365_Transcript_6_10_Confidence_0.455_Length_1657	Anisakis	A0A016SPS7	45.6	388	1.60e-110	2.70639413575077e-15	12.8655	TrEMBL	A0A016SPS7_9BILA	NA	395	NA	Acey_s0195.g1504	Ancylostoma ceylanicum	Peptidase A1 domain-containing protein
A2.transcripts:Locus_3088_Transcript_33_196_Confidence_0.061_Length_1325	Anisakis	A0A0M3K555	100	48	4.98e-23	1.12429629369789e-11	12.8402	TrEMBL	A0A0M3K555_ANISI	NA	292	NA	ASIM_LOCUS15503	Anisakis simplex	Col_cuticle_N domain-containing protein
A2.transcripts:Locus_1_Transcript_82036_107551_Confidence_0.000_Length_1373	Anisakis	A0A0B2VZQ7	65.4	162	6.08e-48	0.0113777990292617	12.8391	TrEMBL	A0A0B2VZQ7_TOXCA	NA	246	NA	Tcan_16034	Toxocara canis	HIG1 domain-containing protein
A2.transcripts:Locus_4_Transcript_4378_21802_Confidence_0.000_Length_607	Anisakis	KHN73958.1	50.0	106	3.62e-18	9.52167002862477e-16	12.8265	Nr	KHN73958	Acetyl-CoA acetyltransferase A, mitochondrial [Toxocara canis]	811	INV	acat1-a	Toxocara canis	Acetyl-CoA acetyltransferase A, mitochondrial
A2.transcripts:Locus_960_Transcript_30_47_Confidence_0.333_Length_2060	Anisakis	A0A3P7IBV4	63.7	600	5.19e-272	1.21611157282573e-11	12.8252	TrEMBL	A0A3P7IBV4_TOXCA	NA	518	NA	TCNE_LOCUS13697	Toxocara canis	Metalloendopeptidase
A2.transcripts:Locus_2_Transcript_14_16_Confidence_0.545_Length_1714	Anisakis	A0A0M3KGG7	100	146	2.90e-62	2.9304763694196e-35	12.7429	TrEMBL	A0A0M3KGG7_ANISI	NA	227	NA	ASIM_LOCUS19466	Anisakis simplex	Col_cuticle_N domain-containing protein
A2.transcripts:Locus_8584_Transcript_34_35_Confidence_0.122_Length_674	Anisakis	A0A0M3K708	100	84	2.01e-08	0.00965219086622291	12.7257	TrEMBL	A0A0M3K708_ANISI	NA	310	NA	ASIM_LOCUS16156	Anisakis simplex	Col_cuticle_N domain-containing protein
A2.transcripts:Locus_3_Transcript_59068_70181_Confidence_0.000_Length_7305	Anisakis	KHN74683.1	57.1	771	1.61e-238	3.61656590293236e-15	12.6718	Nr	KHN74683	Coiled-coil domain-containing protein [Toxocara canis]	813	INV	NA	Toxocara canis	Coiled-coil domain-containing protein
A2.transcripts:Locus_375_Transcript_7_16_Confidence_0.600_Length_1681	Anisakis	A0A0M3JSU8	100	212	8.51e-140	2.13865360852237e-09	12.6708	TrEMBL	A0A0M3JSU8_ANISI	NA	809	NA	ASIM_LOCUS10632	Anisakis simplex	Delta-1-pyrroline-5-carboxylate synthase
A2.transcripts:Locus_1_Transcript_72681_107551_Confidence_0.000_Length_3520	Anisakis	KHN82294.1	83.2	648	0.0	0.0099365082831404	12.6188	Nr	KHN82294	Importin-5 [Toxocara canis]	1131	INV	Ipo5	Toxocara canis	Importin-5
A2.transcripts:Locus_8556_Transcript_14_23_Confidence_0.324_Length_1562	Anisakis	CRZ24893.1	47.4	133	3.11e-24	6.81098106255473e-17	12.557	Nr	CRZ24893	Bm1688 [Brugia malayi]	271	INV	Bm1688	Brugia malayi	Bm1688
A2.transcripts:Locus_242_Transcript_21_37_Confidence_0.104_Length_2117	Anisakis	A0A0M3KCJ8	98.8	252	4.30e-160	0.00912375314069607	12.532	TrEMBL	A0A0M3KCJ8_ANISI	E2K	363	NA	NA	Anisakis simplex	Dihydrolipoyllysine-residue succinyltransferase component of 2-oxoglutarate dehydrogenase complex, mitochondrial
A2.transcripts:Locus_1_Transcript_15_25_Confidence_0.487_Length_1956	Anisakis	KHN81015.1	95.0	241	1.44e-22	7.12881574747464e-08	12.5212	Nr	KHN81015	Putative cuticle collagen [Toxocara canis]	289	INV	col-155	Toxocara canis	putative cuticle collagen
A2.transcripts:Locus_3_Transcript_16963_70181_Confidence_0.000_Length_4290	Anisakis	F1KPY0	60.7	871	0.0	0.00903324214482877	12.5163	TrEMBL	F1KPY0_ASCSU	NA	2012	NA	NA	Ascaris suum	Carboxypeptidase
A2.transcripts:Locus_1165_Transcript_20_116_Confidence_0.116_Length_3013	Anisakis	KHN86070.1	49.4	389	2.08e-97	1.19718504872802e-12	12.4339	Nr	KHN86070	putative ubiquitin carboxyl-terminal hydrolase K02C4.3 [Toxocara canis]	1153	INV	K02C4.3	Toxocara canis	putative ubiquitin carboxyl-terminal hydrolase K02C4.3
A2.transcripts:Locus_19186_Transcript_1_1_Confidence_0.000_Length_1306	Anisakis	A0A0M3K0N5	95.7	141	3.97e-63	4.61385469567332e-11	12.4064	TrEMBL	A0A0M3K0N5_ANISI	NA	281	NA	ASIM_LOCUS13806	Anisakis simplex	Col_cuticle_N domain-containing protein
A2.transcripts:Locus_1_Transcript_32450_107551_Confidence_0.000_Length_2565	Anisakis	KHN82579.1	75.1	305	7.76e-131	0.0129124616798375	12.391	Nr	KHN82579	LIM domain and actin-binding protein 1 [Toxocara canis]	947	INV	LIMA1	Toxocara canis	LIM domain and actin-binding protein 1
A2.transcripts:Locus_2206_Transcript_7_8_Confidence_0.700_Length_1063	Anisakis	A0A0B2V697	63.4	309	1.74e-105	0.00992064470324391	12.367	TrEMBL	A0A0B2V697_TOXCA	NA	251	NA	rpl-6	Toxocara canis	60S ribosomal protein L6
A2.transcripts:Locus_10919_Transcript_7_16_Confidence_0.640_Length_1106	Anisakis	A0A0M3KC03	88.1	285	1.13e-132	2.19983080880684e-07	12.363	TrEMBL	A0A0M3KC03_ANISI	NA	285	NA	ASIM_LOCUS17901	Anisakis simplex	Ground-like domain-containing protein
A2.transcripts:Locus_8584_Transcript_18_35_Confidence_0.408_Length_1348	Anisakis	A0A0M3K708	77.0	391	1.54e-98	1.04949570276973e-07	12.3452	TrEMBL	A0A0M3K708_ANISI	NA	310	NA	ASIM_LOCUS16156	Anisakis simplex	Col_cuticle_N domain-containing protein
A1.A2.R682409	Anisakis	KHN84575.1	65.5	525	3.71e-265	1.98323746072233e-06	12.3438	Nr	KHN84575	Putative tyrosinase-like protein tyr-1 [Toxocara canis]	556	INV	tyr-1	Toxocara canis	putative tyrosinase-like protein tyr-1
A2.transcripts:Locus_1_Transcript_81980_107551_Confidence_0.000_Length_727	Anisakis	A0A0B2VZQ7	72.0	107	1.23e-46	0.0116667814572656	12.3377	TrEMBL	A0A0B2VZQ7_TOXCA	NA	246	NA	Tcan_16034	Toxocara canis	HIG1 domain-containing protein
A2.transcripts:Locus_1_Transcript_13700_107551_Confidence_0.000_Length_6241	Anisakis	KHN80715.1	95.9	417	9.99e-273	0.0104675299843844	12.2815	Nr	KHN80715	Elongation factor 2 [Toxocara canis]	876	INV	eef-2	Toxocara canis	Elongation factor 2
A2.transcripts:Locus_4247_Transcript_6_14_Confidence_0.611_Length_2227	Anisakis	CRZ22658.1	78.0	295	3.06e-161	1.11240718180648e-10	12.2714	Nr	CRZ22658	Bm2468 [Brugia malayi]	383	INV	Bm2468	Brugia malayi	Bm2468
A2.transcripts:Locus_806_Transcript_6_15_Confidence_0.462_Length_1599	Anisakis	KHN73564.1	59.6	89	2.20e-21	5.48972781857297e-25	12.2697	Nr	KHN73564	Cuticle collagen sqt-1 [Toxocara canis]	282	INV	sqt-1	Toxocara canis	Cuticle collagen sqt-1
A0.A2.NODE_3157_length_1060_cov_191.435500_g2674_i0	Anisakis	KHN84575.1	49.2	301	6.70e-88	2.27242881246335e-05	12.1569	Nr	KHN84575	Putative tyrosinase-like protein tyr-1 [Toxocara canis]	556	INV	tyr-1	Toxocara canis	putative tyrosinase-like protein tyr-1
A2.transcripts:Locus_10957_Transcript_9_22_Confidence_0.371_Length_781	Anisakis	A0A0M3JUW3	58.8	114	5.64e-30	2.6534880950613e-12	12.1432	TrEMBL	A0A0M3JUW3_ANISI	NA	278	NA	ASIM_LOCUS11457	Anisakis simplex	Col_cuticle_N domain-containing protein
A2.transcripts:Locus_3_Transcript_14577_70181_Confidence_0.000_Length_2748	Anisakis	A0A0M3JR99	61.8	348	1.81e-121	3.69157471166274e-09	12.1374	TrEMBL	A0A0M3JR99_ANISI	NA	466	NA	ASIM_LOCUS9973	Anisakis simplex	Phosphate carrier protein, mitochondrial
A2.transcripts:Locus_950_Transcript_21_31_Confidence_0.533_Length_1821	Anisakis	KHN79422.1	52.8	472	4.67e-141	2.7768908676034e-12	12.1332	Nr	KHN79422	Interferon regulatory factor 2-binding protein 2-B [Toxocara canis]	437	INV	irf2bp2b	Toxocara canis	Interferon regulatory factor 2-binding protein 2-B
A0.A2.NODE_2895_length_1107_cov_452.422078_g2437_i0	Anisakis	KHN78780.1	33.6	110	3.09e-07	0.000410777984210908	12.1259	Nr	KHN78780	Cuticle collagen lon-3 [Toxocara canis]	330	INV	lon-3	Toxocara canis	Cuticle collagen lon-3
A2.transcripts:Locus_285_Transcript_20_70_Confidence_0.197_Length_2874	Anisakis	A0A183UGG3	77.5	873	0.0	0.0145141656577124	12.099	TrEMBL	A0A183UGG3_TOXCA	NA	1156	NA	TCNE_LOCUS7583	Toxocara canis	Leucyl-tRNA synthetase
A1.A4.R2367292	Anisakis	A0A0M3I474	79.9	349	2.53e-164	2.13865360852237e-09	12.0579	TrEMBL	A0A0M3I474_ASCLU	NA	356	NA	NA	Ascaris lumbricoides	FIP-RBD domain-containing protein
A2.transcripts:Locus_1_Transcript_15152_107551_Confidence_0.000_Length_467	Anisakis	P23731.1	83.7	92	4.24e-49	0.0139315388144921	12.0265	Swiss-Prot	IFEB_ASCSU	RecName: Full=Intermediate filament protein B; Short=IF-B	589	INV	NA	Ascaris suum	Intermediate filament protein B
A2.transcripts:Locus_3_Transcript_63776_70181_Confidence_0.000_Length_1013	Anisakis	A0A0M3K1N2	99.2	133	4.21e-93	3.40437737783134e-07	11.9867	TrEMBL	A0A0M3K1N2_ANISI	NA	143	NA	ASIM_LOCUS14194	Anisakis simplex	GLOBIN domain-containing protein
A2.transcripts:Locus_18649_Transcript_57_79_Confidence_0.058_Length_1611	Anisakis	KHN85335.1	74.7	150	8.00e-75	1.48854693492402e-08	11.9505	Nr	KHN85335	1,2-dihydroxy-3-keto-5-methylthiopentene dioxygenase -like protein 1 [Toxocara canis]	162	INV	T01D1.4	Toxocara canis	1,2-dihydroxy-3-keto-5-methylthiopentene dioxygenase -like protein 1
A2.transcripts:Locus_157_Transcript_534_622_Confidence_0.035_Length_8169	Anisakis	ABL77410.1	23.8	1042	2.51e-66	0.0170947369724153	11.9386	Nr	ABL77410	UA3-recognized allergen, partial [Anisakis simplex]	1096	INV	NA	Anisakis simplex	UA3-recognized allergen
A2.transcripts:Locus_2497_Transcript_25_42_Confidence_0.143_Length_1875	Anisakis	KHN76297.1	87.1	404	1.18e-253	5.4064675070175e-07	11.9048	Nr	KHN76297	Sorting nexin-33 [Toxocara canis]	629	INV	SNX33	Toxocara canis	Sorting nexin-33
A2.transcripts:Locus_2_Transcript_8_16_Confidence_0.409_Length_1285	Anisakis	A0A0M3KGG7	100	146	8.59e-64	2.33058663832419e-12	11.8531	TrEMBL	A0A0M3KGG7_ANISI	NA	227	NA	ASIM_LOCUS19466	Anisakis simplex	Col_cuticle_N domain-containing protein
A2.transcripts:Locus_5402_Transcript_11_20_Confidence_0.630_Length_2936	Anisakis	A0A0M3JSY6	92.3	336	7.06e-201	2.1800186755349e-11	11.8091	TrEMBL	A0A0M3JSY6_ANISI	NA	336	NA	ASIM_LOCUS10672	Anisakis simplex	Ribokinase
A2.transcripts:Locus_20590_Transcript_1_1_Confidence_0.000_Length_1429	Anisakis	KHN73562.1	75.4	418	1.28e-217	0.000952124910021651	11.7983	Nr	KHN73562	Solute carrier family 22 member 4 [Toxocara canis]	504	INV	SLC22A4	Toxocara canis	Solute carrier family 22 member 4
A2.transcripts:Locus_8560_Transcript_2_6_Confidence_0.265_Length_951	Anisakis	A0A0M3KC03	75.0	232	1.29e-78	0.0183876528509905	11.7924	TrEMBL	A0A0M3KC03_ANISI	NA	285	NA	ASIM_LOCUS17901	Anisakis simplex	Ground-like domain-containing protein
A2.transcripts:Locus_1269_Transcript_71_88_Confidence_0.214_Length_3130	Anisakis	KHN78441.1	78.4	654	0.0	4.39597617325782e-11	11.772	Nr	KHN78441	Thioredoxin reductase 1 [Toxocara canis]	652	INV	trxr-1	Toxocara canis	Thioredoxin reductase 1
A2.transcripts:Locus_11087_Transcript_22_35_Confidence_0.349_Length_2106	Anisakis	A0A158PPJ3	94.6	424	6.46e-273	0.0165187600132504	11.7709	TrEMBL	A0A158PPJ3_ANISI	NA	726	NA	ASIM_LOCUS14254	Anisakis simplex	PlsC domain-containing protein
A2.transcripts:Locus_1_Transcript_4406_107551_Confidence_0.000_Length_6695	Anisakis	KHN77544.1	33.2	2054	0.0	0.0251019563316193	11.7625	Nr	KHN77544	Putative serine protease F56F10.1 [Toxocara canis]	986	INV	F56F10.1	Toxocara canis	putative serine protease F56F10.1
A2.transcripts:Locus_19094_Transcript_1_4_Confidence_0.778_Length_1182	Anisakis	KHN87673.1	44.3	210	6.23e-53	0.0232438676076819	11.7221	Nr	KHN87673	Ethanolaminephosphotransferase 1, partial [Toxocara canis]	221	INV	EPT1	Toxocara canis	Ethanolaminephosphotransferase 1
A0.A1.NODE_8428_length_2474_cov_71.270046_g4083_i0	Anisakis	A0A090LSD5	27.6	243	5.76e-22	2.7768908676034e-12	11.7127	TrEMBL	A0A090LSD5_STRRB	NA	977	NA	SRAE_X000044900	Strongyloides ratti	Glucuronosyltransferase
A2.transcripts:Locus_4_Transcript_7117_21802_Confidence_0.000_Length_742	Anisakis	AIU38247.1	90.2	133	2.05e-72	0.0146987462251281	11.704	Nr	AIU38247	heat shock protein 70 [Anisakis pegreffii]	649	INV	hsp70	Anisakis pegreffii	heat shock protein 70
A0.A1.NODE_22651_length_986_cov_9.492927_g10481_i0	Anisakis	CAC38983.1	56.7	134	6.41e-24	5.17540035611466e-15	11.665	Nr	CAC38983	epicuticlin [Ascaris suum]	418	INV	epicut1	Ascaris suum	epicuticlin
A2.transcripts:Locus_1479_Transcript_2_6_Confidence_0.583_Length_3711	Anisakis	A0A158PP95	92.5	520	0.0	6.98770938188833e-11	11.6547	TrEMBL	A0A158PP95_ANISI	NA	1145	NA	ASIM_LOCUS13379	Anisakis simplex	Protein kinase domain-containing protein
A2.transcripts:Locus_110_Transcript_63_210_Confidence_0.042_Length_1247	Anisakis	KHN72825.1	53.0	215	4.29e-45	0.0178131408991309	11.6505	Nr	KHN72825	Spindle- and centromere-associated protein [Toxocara canis]	2166	INV	PUMA1	Toxocara canis	Spindle- and centromere-associated protein
A2.transcripts:Locus_1_Transcript_59868_107551_Confidence_0.000_Length_3675	Anisakis	KHN78052.1	62.3	520	3.59e-196	0.017248068444336	11.6465	Nr	KHN78052	PDZ and LIM domain protein Zasp [Toxocara canis]	733	INV	Zasp52	Toxocara canis	PDZ and LIM domain protein Zasp
A2.transcripts:Locus_8439_Transcript_2_5_Confidence_0.405_Length_913	Anisakis	KHN86196.1	72.2	133	5.18e-62	4.52078429491957e-11	11.6133	Nr	KHN86196	Transthyretin-like protein 46 [Toxocara canis]	138	INV	ttr-46	Toxocara canis	Transthyretin-like protein 46
A2.transcripts:Locus_15361_Transcript_3_5_Confidence_0.300_Length_3040	Anisakis	A0A0M3K5D8	100	188	1.14e-115	5.37912846811798e-07	11.6103	TrEMBL	A0A0M3K5D8_ANISI	NA	188	NA	ASIM_LOCUS15586	Anisakis simplex	60S ribosomal protein L18
A2.transcripts:Locus_3_Transcript_42087_70181_Confidence_0.000_Length_3811	Anisakis	KHN86962.1	68.3	618	2.59e-293	3.31700854207486e-12	11.6016	Nr	KHN86962	Very long-chain specific acyl-CoA dehydrogenase, mitochondrial [Toxocara canis]	626	INV	Acadvl	Toxocara canis	Very long-chain specific acyl-CoA dehydrogenase, mitochondrial
A2.transcripts:Locus_4_Transcript_186_510_Confidence_0.038_Length_1655	Anisakis	A0A0M3J0F9	98.3	58	1.94e-26	3.24850268089887e-05	11.5986	TrEMBL	A0A0M3J0F9_ANISI	NA	210	NA	ASIM_LOCUS892	Anisakis simplex	Col_cuticle_N domain-containing protein
A0.A5.NODE_54350_length_267_cov_3.816964_g36143_i0	Anisakis	A0A0M3KGG7	100	25	9.98e-08	1.3480384496469e-10	11.5982	TrEMBL	A0A0M3KGG7_ANISI	NA	227	NA	ASIM_LOCUS19466	Anisakis simplex	Col_cuticle_N domain-containing protein
A2.transcripts:Locus_3458_Transcript_16_85_Confidence_0.415_Length_4426	Anisakis	A0A0M3K182	97.7	567	2.69e-236	0.0218745556900157	11.5796	TrEMBL	A0A0M3K182_ANISI	NA	887	NA	NA	Anisakis simplex	HMG box domain-containing protein
A2.transcripts:Locus_8437_Transcript_8_11_Confidence_0.667_Length_1007	Anisakis	CAC38981.1	54.0	189	2.10e-31	2.31597460971277e-15	11.5781	Nr	CAC38981	epicuticlin, partial [Ascaris suum]	366	INV	epicut1	Ascaris suum	epicuticlin
A0.A2.NODE_1117_length_1684_cov_933.420544_g910_i0	Anisakis	A0A0M3KCL0	77.7	385	3.13e-76	9.58508195770278e-18	11.5781	TrEMBL	A0A0M3KCL0_ANISI	NA	327	NA	ASIM_LOCUS18106	Anisakis simplex	Col_cuticle_N domain-containing protein
A2.transcripts:Locus_3_Transcript_4560_70181_Confidence_0.000_Length_7182	Anisakis	KHN80417.1	75.5	527	2.85e-253	0.0259205564641356	11.5743	Nr	KHN80417	Solute carrier family 25 member 46 [Toxocara canis]	513	INV	SLC25A46	Toxocara canis	Solute carrier family 25 member 46
A2.transcripts:Locus_259_Transcript_14_28_Confidence_0.424_Length_4874	Anisakis	A0A0B2VP81	44.5	119	9.25e-14	2.05961977753723e-10	11.5735	TrEMBL	A0A0B2VP81_TOXCA	NA	961	NA	Tcan_12416	Toxocara canis	Rab_bind domain-containing protein
A2.transcripts:Locus_57_Transcript_6_13_Confidence_0.609_Length_1468	Anisakis	A0A4E9ETT4	77.1	297	3.47e-54	4.14576226105439e-09	11.5703	TrEMBL	A0A4E9ETT4_BRUMA	NA	298	NA	Bm1714	Brugia malayi	Col_cuticle_N domain-containing protein
A1.A2.R685443	Anisakis	A0A0B2V5B1	50.0	120	2.38e-24	1.36835923989366e-07	11.5651	TrEMBL	A0A0B2V5B1_TOXCA	NA	620	NA	nas-30	Toxocara canis	Metalloendopeptidase
A2.transcripts:Locus_1308_Transcript_3_7_Confidence_0.400_Length_1768	Anisakis	A0A0M3K6L1	86.0	200	1.71e-107	3.07981075002002e-09	11.5565	TrEMBL	A0A0M3K6L1_ANISI	NA	200	NA	ASIM_LOCUS16009	Anisakis simplex	Superoxide dismutase [Cu-Zn]
A2.transcripts:Locus_3_Transcript_18030_70181_Confidence_0.000_Length_1269	Anisakis	CAB50767.1	88.1	101	1.91e-46	2.21197953655165e-06	11.5456	Nr	CAB50767	putative cuticular collagen protein [Ascaris suum]	288	INV	col-C	Ascaris suum	putative cuticular collagen protein
A2.transcripts:Locus_8584_Transcript_20_35_Confidence_0.367_Length_1370	Anisakis	A0A0M3K708	95.3	319	4.31e-108	1.09589631238694e-05	11.5193	TrEMBL	A0A0M3K708_ANISI	NA	310	NA	ASIM_LOCUS16156	Anisakis simplex	Col_cuticle_N domain-containing protein
A2.transcripts:Locus_1_Transcript_11118_107551_Confidence_0.000_Length_3229	Anisakis	A0A498SFC2	75.5	767	0.0	1.76053511516532e-12	11.5167	TrEMBL	A0A498SFC2_ACAVI	NA	1879	NA	NAV_LOCUS3394	Acanthocheilonema viteae	Non-specific serine/threonine protein kinase
A0.A1.NODE_17321_length_1421_cov_3682.802068_g4951_i3	Anisakis	A0A0M3I511	80.1	246	1.72e-140	1.46898251777771e-08	11.5151	TrEMBL	A0A0M3I511_ASCLU	NA	214	NA	NA	Ascaris lumbricoides	Ribosomal_L16 domain-containing protein
A2.transcripts:Locus_851_Transcript_53_54_Confidence_0.139_Length_920	Anisakis	KHN88158.1	39.2	79	2.82e-11	8.42413960200593e-11	11.4921	Nr	KHN88158	Granulin, partial [Toxocara canis]	369	INV	Grn	Toxocara canis	Granulin
A2.transcripts:Locus_229_Transcript_20_30_Confidence_0.444_Length_5832	Anisakis	KHN82631.1	73.2	891	0.0	0.0188780239794669	11.4855	Nr	KHN82631	Serine/threonine-protein kinase mig-15 [Toxocara canis]	1274	INV	mig-15	Toxocara canis	Serine/threonine-protein kinase mig-15
A0.A5.NODE_20918_length_1225_cov_4.707276_g8858_i0	Anisakis	A0A0M3KCL0	87.4	159	1.03e-12	4.23928345002753e-06	11.4805	TrEMBL	A0A0M3KCL0_ANISI	NA	327	NA	ASIM_LOCUS18106	Anisakis simplex	Col_cuticle_N domain-containing protein
A2.transcripts:Locus_1134_Transcript_47_76_Confidence_0.279_Length_2949	Anisakis	KHN78406.1	67.4	497	5.13e-223	0.0168588162147929	11.4779	Nr	KHN78406	Thioredoxin domain-containing protein C06A6.5 [Toxocara canis]	446	INV	C06A6.5	Toxocara canis	Thioredoxin domain-containing protein C06A6.5
A2.transcripts:Locus_1_Transcript_99017_107551_Confidence_0.000_Length_1510	Anisakis	KHN80173.1	80.1	236	1.87e-135	0.0173468431853457	11.4528	Nr	KHN80173	Golgi-associated plant pathogenesis-related protein 1 [Toxocara canis]	305	INV	GLIPR2	Toxocara canis	Golgi-associated plant pathogenesis-related protein 1
A2.transcripts:Locus_4933_Transcript_35_84_Confidence_0.076_Length_3306	Anisakis	A0A0M3K0D6	88.5	710	0.0	0.0176983166045464	11.4507	TrEMBL	A0A0M3K0D6_ANISI	NA	630	NA	ASIM_LOCUS13697	Anisakis simplex	3-hydroxy-3-methylglutaryl coenzyme A reductase
A2.transcripts:Locus_6920_Transcript_14_22_Confidence_0.483_Length_2664	Anisakis	KHN72520.1	81.8	506	3.34e-301	2.19090377569902e-10	11.4384	Nr	KHN72520	Alanine aminotransferase 2 [Toxocara canis]	462	INV	gpt2	Toxocara canis	Alanine aminotransferase 2
A2.transcripts:Locus_4365_Transcript_10_10_Confidence_0.091_Length_1039	Anisakis	A0A3P7LMQ9	47.4	171	7.36e-50	3.77776569747017e-09	11.428	TrEMBL	A0A3P7LMQ9_STRVU	NA	274	NA	SVUK_LOCUS15410	Strongylus vulgaris	Peptidase A1 domain-containing protein
A2.transcripts:Locus_2357_Transcript_9_37_Confidence_0.571_Length_4006	Anisakis	KHN80417.1	58.9	581	2.48e-198	0.0197110393807644	11.4241	Nr	KHN80417	Solute carrier family 25 member 46 [Toxocara canis]	513	INV	SLC25A46	Toxocara canis	Solute carrier family 25 member 46
A2.transcripts:Locus_3_Transcript_43212_70181_Confidence_0.000_Length_3222	Anisakis	A0A0B2VDA8	73.2	459	4.47e-193	0.0180164233447333	11.3896	TrEMBL	A0A0B2VDA8_TOXCA	NA	498	NA	F42G9.1	Toxocara canis	PPM-type phosphatase domain-containing protein
A2.transcripts:Locus_1312_Transcript_10_36_Confidence_0.346_Length_5673	Anisakis	A0A158PP81	99.2	1249	0.0	0.0182146444390198	11.3657	TrEMBL	A0A158PP81_ANISI	NA	1249	NA	ASIM_LOCUS13307	Anisakis simplex	Phosphorylase b kinase regulatory subunit
A2.transcripts:Locus_1_Transcript_60831_107551_Confidence_0.000_Length_1167	Anisakis	A0A0M3JV53	100	72	7.16e-41	1.17787716421052e-07	11.3533	TrEMBL	A0A0M3JV53_ANISI	NA	128	NA	ASIM_LOCUS11559	Anisakis simplex	SHSP domain-containing protein
A2.transcripts:Locus_1_Transcript_22753_107551_Confidence_0.000_Length_2090	Anisakis	A0A0M3IY41	91.4	463	5.10e-289	0.0206107090644184	11.342	TrEMBL	A0A0M3IY41_ANISI	NA	759	NA	NA	Anisakis simplex	Phenylalanyl-tRNA synthetase beta subunit
A2.transcripts:Locus_1968_Transcript_2_18_Confidence_0.015_Length_486	Anisakis	KHN77828.1	65.1	63	1.29e-17	0.0217143347901262	11.341	Nr	KHN77828	Vitellogenin-6 [Toxocara canis]	1693	INV	vit-6	Toxocara canis	Vitellogenin-6
A0.A2.NODE_1408_length_1549_cov_143.823684_g1073_i1	Anisakis	A0A0M3JX15	82.8	430	6.37e-250	6.09643136789067e-07	11.3157	TrEMBL	A0A0M3JX15_ANISI	NA	391	NA	ASIM_LOCUS12332	Anisakis simplex	Lipase_3 domain-containing protein
A2.transcripts:Locus_3907_Transcript_4_7_Confidence_0.357_Length_724	Anisakis	A0A0M3K1N2	99.1	117	1.51e-81	0.0209993165977099	11.2953	TrEMBL	A0A0M3K1N2_ANISI	NA	143	NA	ASIM_LOCUS14194	Anisakis simplex	GLOBIN domain-containing protein
A2.transcripts:Locus_21307_Transcript_3_7_Confidence_0.632_Length_1170	Anisakis	XP_020306467.1	73.2	164	5.35e-72	0.0202568472913975	11.2689	Nr	XP_020306467	DOMON domain-containing protein [Loa loa]	642	INV	NA	Loa loa	DOMON domain-containing protein
A1.A5.J3340267	Anisakis	A0A0M3IYS1	100	149	3.94e-99	0.0220420322616529	11.2682	TrEMBL	A0A0M3IYS1_ANISI	NA	543	NA	ASIM_LOCUS304	Anisakis simplex	Metalloendopeptidase
A2.transcripts:Locus_15786_Transcript_7_14_Confidence_0.368_Length_1193	Anisakis	CDJ90211.1	49.6	258	3.63e-85	1.6188862905208e-12	11.2573	Nr	CDJ90211	Protein C50F4.8 [Haemonchus contortus]	295	INV	NA	Haemonchus contortus	Protein C50F4.8
A2.transcripts:Locus_2574_Transcript_64_101_Confidence_0.314_Length_4011	Anisakis	KHN82928.1	77.1	830	0.0	0.0221766807882659	11.2246	Nr	KHN82928	Aminopeptidase N [Toxocara canis]	1160	INV	NA	Toxocara canis	Aminopeptidase N
A2.transcripts:Locus_4_Transcript_238_510_Confidence_0.006_Length_1632	Anisakis	A0A3P7FK88	56.3	112	8.41e-28	0.00469410088557145	11.222	TrEMBL	A0A3P7FK88_WUCBA	NA	156	NA	WBA_LOCUS4564	Wuchereria bancrofti	Col_cuticle_N domain-containing protein
A0.A2.NODE_6888_length_648_cov_278.649435_g3510_i2	Anisakis	A0A0M3K708	96.4	110	1.54e-60	8.81830326133098e-07	11.2194	TrEMBL	A0A0M3K708_ANISI	NA	310	NA	ASIM_LOCUS16156	Anisakis simplex	Col_cuticle_N domain-containing protein
A2.transcripts:Locus_1_Transcript_70799_107551_Confidence_0.000_Length_4204	Anisakis	KHN82935.1	55.4	765	1.54e-211	0.0219769451037916	11.2191	Nr	KHN82935	Numb-related protein 1 [Toxocara canis]	714	INV	num-1	Toxocara canis	Numb-related protein 1
A2.transcripts:Locus_6750_Transcript_13_14_Confidence_0.476_Length_2868	Anisakis	A0A0M3K1E5	55.8	722	6.17e-220	0.0209945778556466	11.1952	TrEMBL	A0A0M3K1E5_ANISI	NA	581	NA	NA	Anisakis simplex	60S ribosomal protein L27
A2.transcripts:Locus_3616_Transcript_2_2_Confidence_0.500_Length_1844	Anisakis	A0A0M3KAW0	37.2	94	7.11e-10	7.38260286295332e-16	11.1869	TrEMBL	A0A0M3KAW0_ANISI	NA	123	NA	ASIM_LOCUS17505	Anisakis simplex	Col_cuticle_N domain-containing protein
A2.transcripts:Locus_1339_Transcript_7_21_Confidence_0.292_Length_4253	Anisakis	A0A0B2UNY0	92.9	255	9.65e-164	2.0175827630708e-08	11.1837	TrEMBL	A0A0B2UNY0_TOXCA	NA	255	NA	DCUN1D1	Toxocara canis	Defective in cullin neddylation protein
A2.transcripts:Locus_435_Transcript_67_79_Confidence_0.221_Length_5608	Anisakis	CDJ94488.1	43.1	957	2.11e-259	3.26766325607808e-11	11.1678	Nr	CDJ94488	CRE-LPR-2 protein [Haemonchus contortus]	1035	INV	NA	Haemonchus contortus	CRE-LPR-2 protein
A2.transcripts:Locus_11748_Transcript_15_19_Confidence_0.355_Length_3070	Anisakis	KHN83428.1	87.0	644	0.0	0.0225315257109838	11.1674	Nr	KHN83428	ATP-binding cassette sub-family F member 1 [Toxocara canis]	638	INV	ABCF1	Toxocara canis	ATP-binding cassette sub-family F member 1
A2.transcripts:Locus_6671_Transcript_5_49_Confidence_0.193_Length_1414	Anisakis	A0A0M3K6I6	94.7	114	3.06e-60	0.0205845152127895	11.1403	TrEMBL	A0A0M3K6I6_ANISI	NA	300	NA	ASIM_LOCUS15984	Anisakis simplex	VWFA domain-containing protein
A2.transcripts:Locus_8556_Transcript_15_23_Confidence_0.297_Length_1796	Anisakis	CRZ24893.1	47.4	133	5.07e-24	1.09477809695027e-08	11.1273	Nr	CRZ24893	Bm1688 [Brugia malayi]	271	INV	Bm1688	Brugia malayi	Bm1688
A0.A2.NODE_3363_length_1025_cov_324.735944_g2856_i0	Anisakis	A0A0M3K708	100	84	8.37e-08	1.30239455081649e-08	11.112	TrEMBL	A0A0M3K708_ANISI	NA	310	NA	ASIM_LOCUS16156	Anisakis simplex	Col_cuticle_N domain-containing protein
A2.transcripts:Locus_4_Transcript_245_510_Confidence_0.012_Length_1255	Anisakis	AZA15222.1	99.0	98	8.06e-54	1.27696468857761e-05	11.0998	Nr	AZA15222	cuticle collagen 34 [Anisakis simplex]	292	INV	col-34	Anisakis simplex	cuticle collagen 34
A2.transcripts:Locus_4_Transcript_359_510_Confidence_0.005_Length_1320	Anisakis	KHN79527.1	44.9	158	3.46e-10	2.60383057019911e-07	11.0712	Nr	KHN79527	Cuticle collagen dpy-5 [Toxocara canis]	1172	INV	dpy-5	Toxocara canis	Cuticle collagen dpy-5
A1.A2.R682358	Anisakis	A0A0M3K708	95.3	318	2.32e-107	2.68235178076893e-09	11.059	TrEMBL	A0A0M3K708_ANISI	NA	310	NA	ASIM_LOCUS16156	Anisakis simplex	Col_cuticle_N domain-containing protein
A2.transcripts:Locus_714_Transcript_10_57_Confidence_0.091_Length_608	Anisakis	A0A068FMJ2	100	113	5.93e-68	0.0230496511140285	11.0573	TrEMBL	A0A068FMJ2_ANISI	NA	674	NA	NA	Anisakis simplex	Glycogen [starch] synthase
A0.A1.NODE_1633_length_4749_cov_262.458565_g593_i1	Anisakis	KHN80132.1	44.5	1290	4.23e-261	0.0334970893776436	11.0498	Nr	KHN80132	Sorbin and SH3 domain-containing protein 1 [Toxocara canis]	1229	INV	Sorbs1	Toxocara canis	Sorbin and SH3 domain-containing protein 1
A2.transcripts:Locus_3_Transcript_53205_70181_Confidence_0.000_Length_2813	Anisakis	KHN76280.1	75.1	758	0.0	0.023627425488555	10.9943	Nr	KHN76280	Crooked neck-like protein 1 [Toxocara canis]	804	INV	Crnkl1	Toxocara canis	Crooked neck-like protein 1
A2.transcripts:Locus_721_Transcript_33_78_Confidence_0.477_Length_7897	Anisakis	AXS78248.1	99.7	1271	0.0	0.0249930118578404	10.99	Nr	AXS78248	laminin alpha [Anisakis simplex]	3680	INV	epi-1	Anisakis simplex	laminin alpha
A2.transcripts:Locus_4_Transcript_184_510_Confidence_0.036_Length_1905	Anisakis	A0A0M3J0F9	81.0	58	5.54e-19	0.000927550709948665	10.9538	TrEMBL	A0A0M3J0F9_ANISI	NA	210	NA	ASIM_LOCUS892	Anisakis simplex	Col_cuticle_N domain-containing protein
A2.transcripts:Locus_18649_Transcript_2_3_Confidence_0.400_Length_652	Anisakis	A0A0M3J262	100	117	7.94e-82	0.0353932199180555	10.9478	TrEMBL	A0A0M3J262_ANISI	NA	191	NA	ASIM_LOCUS1493	Anisakis simplex	DB domain-containing protein
A2.transcripts:Locus_2015_Transcript_94_150_Confidence_0.015_Length_2240	Anisakis	AXS78248.1	100	253	2.76e-157	0.0301236796431045	10.9441	Nr	AXS78248	laminin alpha [Anisakis simplex]	3680	INV	epi-1	Anisakis simplex	laminin alpha
A2.transcripts:Locus_960_Transcript_16_47_Confidence_0.259_Length_983	Anisakis	A0A0B2V5B1	61.2	209	3.28e-77	2.54126949849021e-08	10.9022	TrEMBL	A0A0B2V5B1_TOXCA	NA	620	NA	nas-30	Toxocara canis	Metalloendopeptidase
A2.transcripts:Locus_10919_Transcript_14_16_Confidence_0.440_Length_812	Anisakis	A0A0M3KC03	95.6	137	9.46e-92	1.72399600301175e-05	10.8903	TrEMBL	A0A0M3KC03_ANISI	NA	285	NA	ASIM_LOCUS17901	Anisakis simplex	Ground-like domain-containing protein
A2.transcripts:Locus_5137_Transcript_5_9_Confidence_0.400_Length_731	Anisakis	A0A0B2VW50	80.5	118	1.99e-57	3.28774097000684e-07	10.8849	TrEMBL	A0A0B2VW50_TOXCA	NA	237	NA	SWEET10	Toxocara canis	Sugar transporter SWEET
A2.transcripts:Locus_8584_Transcript_19_35_Confidence_0.388_Length_1415	Anisakis	A0A0M3K708	92.3	182	2.87e-93	8.87195015215146e-06	10.881	TrEMBL	A0A0M3K708_ANISI	NA	310	NA	ASIM_LOCUS16156	Anisakis simplex	Col_cuticle_N domain-containing protein
A2.transcripts:Locus_6910_Transcript_16_20_Confidence_0.478_Length_3182	Anisakis	KHN87065.1	42.1	749	2.09e-159	0.0245380475356232	10.8702	Nr	KHN87065	Prominin-1 [Toxocara canis]	794	INV	Prom1	Toxocara canis	Prominin-1
A2.transcripts:Locus_4_Transcript_12173_21802_Confidence_0.001_Length_4438	Anisakis	KHN72859.1	63.1	1190	0.0	1.25399833523303e-08	10.847	Nr	KHN72859	Ral GTPase-activating protein subunit beta [Toxocara canis]	1635	INV	RALGAPB	Toxocara canis	Ral GTPase-activating protein subunit beta
A0.A2.NODE_3170_length_1059_cov_32.065049_g2684_i0	Anisakis	A0A498SM51	44.1	145	9.46e-09	0.0277405395583072	10.8308	TrEMBL	A0A498SM51_ACAVI	NA	326	NA	NAV_LOCUS6949	Acanthocheilonema viteae	Col_cuticle_N domain-containing protein
A2.transcripts:Locus_1_Transcript_87626_107551_Confidence_0.000_Length_1097	Anisakis	KHN79940.1	69.9	193	2.05e-89	0.0247794042746419	10.8173	Nr	KHN79940	Major egg antigen [Toxocara canis]	190	INV	NA	Toxocara canis	Major egg antigen
A2.transcripts:Locus_806_Transcript_5_15_Confidence_0.346_Length_931	Anisakis	KHN73564.1	68.3	120	6.97e-22	1.64335416015089e-07	10.8161	Nr	KHN73564	Cuticle collagen sqt-1 [Toxocara canis]	282	INV	sqt-1	Toxocara canis	Cuticle collagen sqt-1
A2.transcripts:Locus_1_Transcript_17434_107551_Confidence_0.000_Length_1850	Anisakis	A0A3P7GTT5	86.9	343	1.35e-210	0.0246552082649035	10.8159	TrEMBL	A0A3P7GTT5_TOXCA	NA	518	NA	TCNE_LOCUS13258	Toxocara canis	Glucose-6-phosphate isomerase
A2.transcripts:Locus_960_Transcript_10_47_Confidence_0.222_Length_845	Anisakis	A0A0B2V5B1	58.2	153	1.03e-43	0.0293532419773194	10.7991	TrEMBL	A0A0B2V5B1_TOXCA	NA	620	NA	nas-30	Toxocara canis	Metalloendopeptidase
A2.transcripts:Locus_1_Transcript_25513_107551_Confidence_0.000_Length_4944	Anisakis	A0A0M3JTN6	99.4	357	3.48e-211	0.0249338059278356	10.7906	TrEMBL	A0A0M3JTN6_ANISI	NA	1808	NA	ASIM_LOCUS10969	Anisakis simplex	MATH domain-containing protein
A2.transcripts:Locus_12477_Transcript_18_19_Confidence_0.381_Length_1231	Anisakis	A0A0B2VFD6	76.3	118	1.59e-48	6.94123800637309e-09	10.7825	TrEMBL	A0A0B2VFD6_TOXCA	NA	450	NA	Tcan_13196	Toxocara canis	Neur_chan_LBD domain-containing protein
A2.transcripts:Locus_6032_Transcript_4_7_Confidence_0.684_Length_5633	Anisakis	KHN82982.1	70.4	1817	0.0	0.0365134492841228	10.7777	Nr	KHN82982	Protein SOGA2 [Toxocara canis]	1766	INV	Soga2	Toxocara canis	Protein SOGA2
A2.transcripts:Locus_1178_Transcript_77_120_Confidence_0.069_Length_1753	Anisakis	KHN85432.1	50.4	228	1.02e-35	0.0287467613164056	10.7535	Nr	KHN85432	EF-hand domain-containing protein D1 [Toxocara canis]	238	INV	EFHD1	Toxocara canis	EF-hand domain-containing protein D1
A2.transcripts:Locus_3_Transcript_32051_70181_Confidence_0.000_Length_5957	Anisakis	A0A0M3JWQ8	89.7	370	4.66e-201	0.0256144215795455	10.7502	TrEMBL	A0A0M3JWQ8_ANISI	NA	757	NA	NA	Anisakis simplex	Ras-associating domain-containing protein
A2.transcripts:Locus_2821_Transcript_10_11_Confidence_0.647_Length_1948	Anisakis	KJH42423.1	68.9	193	8.92e-61	4.31684242275993e-08	10.7462	Nr	KJH42423	nematode cuticle collagen domain protein [Dictyocaulus viviparus]	332	INV	NA	Dictyocaulus viviparus	nematode cuticle collagen domain protein
A2.transcripts:Locus_18847_Transcript_58_59_Confidence_0.333_Length_1586	Anisakis	KHN82102.1	54.2	107	7.00e-29	0.0266506120869061	10.7339	Nr	KHN82102	Paternally-expressed protein [Toxocara canis]	3286	INV	PEG3	Toxocara canis	Paternally-expressed protein
A2.transcripts:Locus_3596_Transcript_38_59_Confidence_0.204_Length_2975	Anisakis	A0A0M3K407	98.0	301	3.79e-193	6.2341931175114e-07	10.7213	TrEMBL	A0A0M3K407_ANISI	NA	329	NA	ASIM_LOCUS15105	Anisakis simplex	Nuclear receptor domain-containing protein
A0.A2.NODE_3533_length_1000_cov_102.315139_g2674_i1	Anisakis	KHN84575.1	36.8	234	3.20e-34	0.0292913787184689	10.7212	Nr	KHN84575	Putative tyrosinase-like protein tyr-1 [Toxocara canis]	556	INV	tyr-1	Toxocara canis	putative tyrosinase-like protein tyr-1
A0.A0.NODE_19027_length_766_cov_4.258790_g11222_i0	Anisakis	CRZ24893.1	35.5	169	3.48e-19	2.65569211642709e-08	10.7193	Nr	CRZ24893	Bm1688 [Brugia malayi]	271	INV	Bm1688	Brugia malayi	Bm1688
A2.transcripts:Locus_1_Transcript_2613_107551_Confidence_0.000_Length_1219	Anisakis	KHN81970.1	67.2	250	8.43e-109	1.75719688249582e-10	10.7067	Nr	KHN81970	Major facilitator superfamily domain-containing protein 8 [Toxocara canis]	543	INV	mfsd8	Toxocara canis	Major facilitator superfamily domain-containing protein 8
A2.transcripts:Locus_367_Transcript_8_12_Confidence_0.400_Length_2348	Anisakis	KHN81420.1	72.4	606	0.0	0.0327949203211594	10.7064	Nr	KHN81420	Zinc metalloproteinase nas-36, partial [Toxocara canis]	577	INV	nas-36	Toxocara canis	Zinc metalloproteinase nas-36
A2.transcripts:Locus_73_Transcript_32_78_Confidence_0.168_Length_3547	Anisakis	CDW75723.1	43.3	453	1.94e-63	1.08315054801324e-09	10.6925	Nr	CDW75723	UNKNOWN [Stylonychia lemnae]	1881	INV	Contig11071.g11842	Stylonychia lemnae	UNKNOWN
A0.A2.NODE_4547_length_864_cov_854.771257_g3861_i0	Anisakis	A0A0M3II91	79.7	64	2.41e-24	1.39976162850687e-07	10.6808	TrEMBL	A0A0M3II91_ASCLU	NA	366	NA	NA	Ascaris lumbricoides	Col_cuticle_N domain-containing protein
A2.transcripts:Locus_11254_Transcript_11_24_Confidence_0.400_Length_1888	Anisakis	CDP91065.1	50.9	328	8.39e-76	1.08315054801324e-09	10.6789	Nr	CDP91065	Bm1793 [Brugia malayi]	479	INV	Bm1793	Brugia malayi	Bm1793
A2.transcripts:Locus_319_Transcript_50_79_Confidence_0.145_Length_4516	Anisakis	KHN82510.1	93.8	867	0.0	6.82145314911653e-07	10.6765	Nr	KHN82510	Sodium/potassium-transporting ATPase subunit alpha [Toxocara canis]	1010	INV	Atpalpha	Toxocara canis	Sodium/potassium-transporting ATPase subunit alpha
A2.transcripts:Locus_508_Transcript_6_28_Confidence_0.513_Length_2625	Anisakis	KHN75335.1	53.6	308	8.73e-94	5.4266243841045e-09	10.674	Nr	KHN75335	Putative cysteine proteinase [Toxocara canis]	445	INV	NA	Toxocara canis	putative cysteine proteinase
A2.transcripts:Locus_543_Transcript_24_100_Confidence_0.114_Length_6758	Anisakis	A0A0B2V3B5	56.6	1361	0.0	1.11247930949453e-10	10.6681	TrEMBL	A0A0B2V3B5_TOXCA	NA	2048	NA	ZK512.5	Toxocara canis	Protein transport protein sec16
A2.transcripts:Locus_3409_Transcript_11_72_Confidence_0.301_Length_2734	Anisakis	A0A0M3JVC8	99.0	201	1.63e-129	0.0311207365260075	10.6665	TrEMBL	A0A0M3JVC8_ANISI	NA	266	NA	ASIM_LOCUS11643	Anisakis simplex	Glycosyltransferase family 92 protein
A2.transcripts:Locus_234_Transcript_56_98_Confidence_0.095_Length_3184	Anisakis	KHN80384.1	86.8	281	3.25e-159	0.032140365799261	10.6549	Nr	KHN80384	MAGUK p55 subfamily member 6 [Toxocara canis]	609	INV	MPP6	Toxocara canis	MAGUK p55 subfamily member 6
A2.transcripts:Locus_3_Transcript_34613_70181_Confidence_0.000_Length_1512	Anisakis	KHN73205.1	74.7	257	4.22e-114	0.0284811987011462	10.6516	Nr	KHN73205	Methylmalonic aciduria type A -like protein, mitochondrial [Toxocara canis]	411	INV	mmaa-1	Toxocara canis	Methylmalonic aciduria type A -like protein, mitochondrial
A2.transcripts:Locus_4_Transcript_82_510_Confidence_0.008_Length_2002	Anisakis	A0A0M3K913	100	129	1.41e-80	0.0309970732921643	10.6506	TrEMBL	A0A0M3K913_ANISI	NA	143	NA	ASIM_LOCUS16861	Anisakis simplex	Col_cuticle_N domain-containing protein
A2.transcripts:Locus_38280_Transcript_1_2_Confidence_0.750_Length_1146	Anisakis	KJH42423.1	68.9	193	1.95e-63	0.000116267580868168	10.6286	Nr	KJH42423	nematode cuticle collagen domain protein [Dictyocaulus viviparus]	332	INV	NA	Dictyocaulus viviparus	nematode cuticle collagen domain protein
A2.transcripts:Locus_494_Transcript_35_46_Confidence_0.529_Length_2849	Anisakis	A0A0M3JYV7	89.3	309	2.69e-167	0.0274805246847997	10.6226	TrEMBL	A0A0M3JYV7_ANISI	NA	297	NA	ASIM_LOCUS13078	Anisakis simplex	Prohibitin
A2.transcripts:Locus_596_Transcript_23_50_Confidence_0.095_Length_2278	Anisakis	A0A0M3K845	91.4	313	7.84e-190	6.30472719036663e-06	10.6015	TrEMBL	A0A0M3K845_ANISI	NA	550	NA	NA	Anisakis simplex	Flavin-containing monooxygenase
A2.transcripts:Locus_259_Transcript_21_28_Confidence_0.394_Length_4003	Anisakis	A0A0B2VP81	27.9	391	7.45e-08	1.23374165808573e-08	10.5976	TrEMBL	A0A0B2VP81_TOXCA	NA	961	NA	Tcan_12416	Toxocara canis	Rab_bind domain-containing protein
A2.transcripts:Locus_11687_Transcript_17_33_Confidence_0.225_Length_2364	Anisakis	A0A183UEA8	69.3	476	1.39e-195	1.48878156667081e-10	10.593	TrEMBL	A0A183UEA8_TOXCA	NA	739	NA	TCNE_LOCUS6828	Toxocara canis	Glutathione peroxidase
A0.A2.NODE_4894_length_823_cov_295.928212_g2437_i2	Anisakis	KHN78780.1	33.6	110	7.09e-08	0.00128035469262133	10.5914	Nr	KHN78780	Cuticle collagen lon-3 [Toxocara canis]	330	INV	lon-3	Toxocara canis	Cuticle collagen lon-3
A2.transcripts:Locus_5505_Transcript_11_16_Confidence_0.444_Length_7169	Anisakis	A0A158PN45	88.4	933	0.0	0.0351355235402202	10.59	TrEMBL	A0A158PN45_ANISI	NA	851	NA	ASIM_LOCUS10544	Anisakis simplex	Ubiquitin carboxyl-terminal hydrolase
A2.transcripts:Locus_3_Transcript_35520_70181_Confidence_0.000_Length_5177	Anisakis	KHN87285.1	70.5	593	7.52e-275	0.0319308745762869	10.589	Nr	KHN87285	Degenerin-like protein T28D9.7 [Toxocara canis]	1219	INV	T28D9.7	Toxocara canis	Degenerin-like protein T28D9.7
A2.transcripts:Locus_3_Transcript_17535_70181_Confidence_0.000_Length_1206	Anisakis	J9AUK2	74.5	55	5.40e-13	0.000956310026083769	10.5875	TrEMBL	J9AUK2_WUCBA	NA	109	NA	WUBG_10937	Wuchereria bancrofti	Col_cuticle_N domain-containing protein
A1.A4.R2390631	Anisakis	A0A0M3JVU4	71.9	974	0.0	4.07581029955104e-06	10.5689	TrEMBL	A0A0M3JVU4_ANISI	NA	738	NA	ASIM_LOCUS11826	Anisakis simplex	WD_REPEATS_REGION domain-containing protein
A2.transcripts:Locus_3607_Transcript_41_43_Confidence_0.274_Length_2847	Anisakis	KHN85426.1	84.9	583	0.0	0.0299235895713474	10.5668	Nr	KHN85426	Glycine dehydrogenase [decarboxylating], mitochondrial [Toxocara canis]	949	INV	Gldc	Toxocara canis	Glycine dehydrogenase [decarboxylating], mitochondrial
A2.transcripts:Locus_655_Transcript_66_102_Confidence_0.054_Length_881	Anisakis	KHN84714.1	68.0	175	9.39e-79	0.0306650051883885	10.5623	Nr	KHN84714	Dual specificity protein phosphatase 14 [Toxocara canis]	205	INV	Dusp14	Toxocara canis	Dual specificity protein phosphatase 14
A2.transcripts:Locus_4_Transcript_181_510_Confidence_0.009_Length_921	Anisakis	A0A0M3J3M0	77.6	58	1.15e-20	0.0379647606425803	10.5595	TrEMBL	A0A0M3J3M0_ANISI	NA	135	NA	ASIM_LOCUS2002	Anisakis simplex	Col_cuticle_N domain-containing protein
A2.transcripts:Locus_1_Transcript_83688_107551_Confidence_0.000_Length_1714	Anisakis	A0A183V8Z4	60.6	274	6.85e-96	2.30865349852941e-08	10.5551	TrEMBL	A0A183V8Z4_TOXCA	NA	268	NA	TCNE_LOCUS17214	Toxocara canis	Major sperm protein
A2.transcripts:Locus_3_Transcript_6582_70181_Confidence_0.000_Length_2202	Anisakis	A0A183V5D4	96.6	263	1.46e-202	0.0331682496858321	10.5282	TrEMBL	A0A183V5D4_TOXCA	NA	282	NA	TCNE_LOCUS15954	Toxocara canis	Paxillin
A2.transcripts:Locus_639_Transcript_20_471_Confidence_0.012_Length_1142	Anisakis	A0A183U3H3	66.2	157	8.24e-63	2.70759298674862e-08	10.5237	TrEMBL	A0A183U3H3_TOXCA	NA	179	NA	TCNE_LOCUS3043	Toxocara canis	Mitochondrial inner membrane protease subunit 2
A2.transcripts:Locus_3_Transcript_36660_70181_Confidence_0.000_Length_2011	Anisakis	A0A0M3JWQ9	98.9	531	0.0	0.0290861305489149	10.5225	TrEMBL	A0A0M3JWQ9_ANISI	NA	531	NA	ASIM_LOCUS12200	Anisakis simplex	P4Hc domain-containing protein
A2.transcripts:Locus_235_Transcript_40_82_Confidence_0.143_Length_5848	Anisakis	A0A0B2UNG9	83.3	293	5.43e-158	1.61165935300173e-07	10.5014	TrEMBL	A0A0B2UNG9_TOXCA	NA	338	NA	Fbp2	Toxocara canis	Fructose-bisphosphatase
A2.transcripts:Locus_2280_Transcript_15_18_Confidence_0.469_Length_3810	Anisakis	A0A0M3JXM2	94.5	255	8.54e-161	0.0302371202442044	10.4939	TrEMBL	A0A0M3JXM2_ANISI	NA	255	NA	ASIM_LOCUS12575	Anisakis simplex	PPM-type phosphatase domain-containing protein
A2.transcripts:Locus_255_Transcript_110_258_Confidence_0.044_Length_5982	Anisakis	P12845.2	70.8	911	0.0	0.0295677679705013	10.4914	Swiss-Prot	MYO2_CAEEL	RecName: Full=Myosin-2; AltName: Full=Myosin heavy chain C; Short=MHC C	1947	INV	NA	Caenorhabditis elegans	Myosin-2
A0.A2.NODE_1840_length_1392_cov_28951.415994_g1531_i0	Anisakis	AZA15244.1	100	43	1.32e-17	1.17598381637371e-05	10.488	Nr	AZA15244	cuticle collagen 34 [Anisakis pegreffii]	292	INV	col-34	Anisakis pegreffii	cuticle collagen 34
A2.transcripts:Locus_3_Transcript_63284_70181_Confidence_0.000_Length_4371	Anisakis	F1KTH9	96.2	997	0.0	1.78139610027138e-09	10.4848	TrEMBL	F1KTH9_ASCSU	NA	1056	NA	NA	Ascaris suum	Phospholipid-transporting ATPase
A2.transcripts:Locus_1228_Transcript_90_191_Confidence_0.229_Length_4863	Anisakis	F1KU23	61.7	661	2.31e-261	0.0343482990908461	10.4739	TrEMBL	F1KU23_ASCSU	Autophagy-related protein 7	671	NA	NA	Ascaris suum	Ubiquitin-like modifier-activating enzyme ATG7
A2.transcripts:Locus_233_Transcript_95_227_Confidence_0.023_Length_2715	Anisakis	A0A0M3IY04	97.9	236	4.27e-145	0.0306098924953624	10.4689	TrEMBL	A0A0M3IY04_ANISI	NA	334	NA	ASIM_LOCUS30	Anisakis simplex	PHB domain-containing protein
A2.transcripts:Locus_989_Transcript_5_9_Confidence_0.407_Length_3093	Anisakis	KHN79833.1	83.5	364	4.33e-204	1.74332671777341e-07	10.4626	Nr	KHN79833	Nucleolysin TIAR [Toxocara canis]	366	INV	Tial1	Toxocara canis	Nucleolysin TIAR
A2.transcripts:Locus_3_Transcript_32283_70181_Confidence_0.000_Length_5582	Anisakis	A0A0M3K381	61.5	455	2.11e-151	1.29477432614708e-09	10.4487	TrEMBL	A0A0M3K381_ANISI	Phosphoserine phosphatase	296	NA	ASIM_LOCUS14827	Anisakis simplex	O-phosphoserine phosphohydrolase
A2.transcripts:Locus_806_Transcript_3_15_Confidence_0.385_Length_833	Anisakis	KHN73564.1	68.6	118	9.54e-20	4.58308267126529e-09	10.4307	Nr	KHN73564	Cuticle collagen sqt-1 [Toxocara canis]	282	INV	sqt-1	Toxocara canis	Cuticle collagen sqt-1
A2.transcripts:Locus_2498_Transcript_57_74_Confidence_0.223_Length_7486	Anisakis	KHN82931.1	67.8	879	0.0	0.0306962656636242	10.4224	Nr	KHN82931	1-phosphatidylinositol 4,5-bisphosphate phosphodiesterase beta-2 [Toxocara canis]	927	INV	Plcb2	Toxocara canis	1-phosphatidylinositol 4,5-bisphosphate phosphodiesterase beta-2
A2.transcripts:Locus_18869_Transcript_1_3_Confidence_0.750_Length_1658	Anisakis	XP_020304658.1	70.7	375	6.91e-121	2.71340931158076e-08	10.4156	Nr	XP_020304658	zinc finger protein, partial [Loa loa]	437	INV	NA	Loa loa	zinc finger protein
A2.transcripts:Locus_3437_Transcript_11_15_Confidence_0.438_Length_3480	Anisakis	CRZ25722.1	41.5	241	3.04e-47	0.0364361774204587	10.4076	Nr	CRZ25722	Bm4778 [Brugia malayi]	427	INV	Bm4778	Brugia malayi	Bm4778
A2.transcripts:Locus_16302_Transcript_74_74_Confidence_0.248_Length_4133	Anisakis	A0A0M3K2Y0	95.2	778	0.0	2.34568742026282e-05	10.3848	TrEMBL	A0A0M3K2Y0_ANISI	Alpha-trehalose glucohydrolase	910	NA	NA	Anisakis simplex	Trehalase
A2.transcripts:Locus_25211_Transcript_45_61_Confidence_0.222_Length_1549	Anisakis	CDQ05675.1	64.5	344	8.58e-119	0.0319844669786639	10.3821	Nr	CDQ05675	Bm4040 [Brugia malayi]	325	INV	Bm4040	Brugia malayi	Bm4040
A2.transcripts:Locus_1_Transcript_78609_107551_Confidence_0.000_Length_1670	Anisakis	KHN82102.1	67.9	131	3.16e-52	0.0361637012059603	10.3789	Nr	KHN82102	Paternally-expressed protein [Toxocara canis]	3286	INV	PEG3	Toxocara canis	Paternally-expressed protein
A2.transcripts:Locus_10797_Transcript_16_40_Confidence_0.352_Length_1906	Anisakis	KHN84575.1	56.8	484	5.20e-197	0.000557573377897105	10.3749	Nr	KHN84575	Putative tyrosinase-like protein tyr-1 [Toxocara canis]	556	INV	tyr-1	Toxocara canis	putative tyrosinase-like protein tyr-1
A2.transcripts:Locus_3574_Transcript_19_139_Confidence_0.112_Length_1212	Anisakis	KHN89109.1	89.2	102	1.10e-51	0.0319844669786639	10.3689	Nr	KHN89109	Uracil phosphoribosyltransferase -like protein [Toxocara canis]	152	INV	uprt	Toxocara canis	Uracil phosphoribosyltransferase -like protein
A2.transcripts:Locus_3_Transcript_36847_70181_Confidence_0.000_Length_3406	Anisakis	XP_001898917.1	53.1	245	1.54e-52	0.0351629406857155	10.3613	Nr	XP_001898917	ankyrin-related unc-44 [Brugia malayi]	347	INV	NA	Brugia malayi	ankyrin-related unc-44
A2.transcripts:Locus_3_Transcript_35516_70181_Confidence_0.000_Length_5391	Anisakis	KHN87285.1	69.9	648	3.10e-299	0.0327949203211594	10.356	Nr	KHN87285	Degenerin-like protein T28D9.7 [Toxocara canis]	1219	INV	T28D9.7	Toxocara canis	Degenerin-like protein T28D9.7
A0.A2.NODE_2646_length_1166_cov_22375.399296_g1531_i2	Anisakis	AZA15244.1	97.7	44	4.83e-18	4.04505592613604e-05	10.3465	Nr	AZA15244	cuticle collagen 34 [Anisakis pegreffii]	292	INV	col-34	Anisakis pegreffii	cuticle collagen 34
A2.transcripts:Locus_443_Transcript_366_538_Confidence_0.011_Length_708	Anisakis	A0A0M3JT41	98.6	70	3.48e-30	0.036746228817278	10.3365	TrEMBL	A0A0M3JT41_ANISI	NA	783	NA	ASIM_LOCUS10735	Anisakis simplex	Phosphodiesterase
A2.transcripts:Locus_1_Transcript_107418_107551_Confidence_0.000_Length_752	Anisakis	F1KTH4	28.8	104	2.67e-07	0.0340756115978937	10.3358	TrEMBL	F1KTH4_ASCSU	Dynamin-like 120 kDa protein, mitochondrial	983	NA	NA	Ascaris suum	Dynamin-like 120 kDa protein, form S1
A2.transcripts:Locus_3_Transcript_40627_70181_Confidence_0.000_Length_4728	Anisakis	A0A3P7GB81	92.2	434	1.79e-291	2.15785877689029e-09	10.3273	TrEMBL	A0A3P7GB81_TOXCA	Fructose-2,6-bisphosphatase	468	NA	TCNE_LOCUS6217	Toxocara canis	6-phosphofructo-2-kinase
A2.transcripts:Locus_4039_Transcript_8_10_Confidence_0.550_Length_1667	Anisakis	A0A0M3JX15	84.3	325	2.56e-190	0.0373701448441712	10.315	TrEMBL	A0A0M3JX15_ANISI	NA	391	NA	ASIM_LOCUS12332	Anisakis simplex	Lipase_3 domain-containing protein
A2.transcripts:Locus_4_Transcript_4796_21802_Confidence_0.000_Length_2362	Anisakis	A0A0B2V4W7	87.4	365	2.74e-228	4.39299677104983e-09	10.3081	TrEMBL	A0A0B2V4W7_TOXCA	NA	528	NA	Ddx17	Toxocara canis	RNA helicase
A2.transcripts:Locus_19714_Transcript_57_85_Confidence_0.165_Length_4150	Anisakis	KHN72015.1	62.2	259	3.09e-96	9.03364052779173e-07	10.3021	Nr	KHN72015	C-terminal-binding protein 1 [Toxocara canis]	489	INV	Ctbp1	Toxocara canis	C-terminal-binding protein 1
A2.transcripts:Locus_5007_Transcript_48_89_Confidence_0.153_Length_5544	Anisakis	A0A158PMU2	37.8	1522	5.10e-243	0.036269052417974	10.3014	TrEMBL	A0A158PMU2_ANISI	NA	648	NA	NA	Anisakis simplex	Phosphate transporter
A0.A2.NODE_14737_length_355_cov_72.690184_g13549_i0	Anisakis	A0A3P7IBV4	72.0	82	2.66e-29	1.47158647773165e-07	10.2964	TrEMBL	A0A3P7IBV4_TOXCA	NA	518	NA	TCNE_LOCUS13697	Toxocara canis	Metalloendopeptidase
A2.transcripts:Locus_9610_Transcript_10_27_Confidence_0.474_Length_5045	Anisakis	KHN88761.1	43.5	788	1.97e-156	0.0392325727006226	10.2944	Nr	KHN88761	LIM and calponin homology domains-containing protein 1 [Toxocara canis]	935	INV	LIMCH1	Toxocara canis	LIM and calponin homology domains-containing protein 1
A2.transcripts:Locus_1_Transcript_49532_107551_Confidence_0.000_Length_752	Anisakis	A0A0M3KE35	69.5	151	2.26e-64	0.0361962182702757	10.2887	TrEMBL	A0A0M3KE35_ANISI	NA	154	NA	ASIM_LOCUS18633	Anisakis simplex	DUF4440 domain-containing protein
A2.transcripts:Locus_4_Transcript_12481_21802_Confidence_0.000_Length_3733	Anisakis	A0A3P7GTT5	95.5	178	7.38e-105	0.0385678207088899	10.2866	TrEMBL	A0A3P7GTT5_TOXCA	NA	518	NA	TCNE_LOCUS13258	Toxocara canis	Glucose-6-phosphate isomerase
A2.transcripts:Locus_3_Transcript_32914_70181_Confidence_0.000_Length_5253	Anisakis	A0A0M3I6L4	92.6	95	1.79e-47	0.0377168632930745	10.276	TrEMBL	A0A0M3I6L4_ASCLU	NA	254	NA	NA	Ascaris lumbricoides	RRM domain-containing protein
A2.transcripts:Locus_1_Transcript_56652_107551_Confidence_0.000_Length_6801	Anisakis	F1KPT5	84.6	949	0.0	2.79513875364129e-09	10.2729	TrEMBL	F1KPT5_ASCSU	NA	2464	NA	NA	Ascaris suum	Serine/threonine-protein kinase TOR
A2.transcripts:Locus_8662_Transcript_10_10_Confidence_0.077_Length_2195	Anisakis	KHN85314.1	67.8	239	2.67e-103	0.000333672855763841	10.2698	Nr	KHN85314	Putative acid phosphatase F26C11.1 [Toxocara canis]	967	INV	F26C11.1	Toxocara canis	putative acid phosphatase F26C11.1
A2.transcripts:Locus_1_Transcript_88020_107551_Confidence_0.000_Length_2279	Anisakis	KHN85848.1	39.1	174	8.29e-20	3.63906037377381e-09	10.2641	Nr	KHN85848	Hemicentin-1 [Toxocara canis]	1056	INV	HMCN1	Toxocara canis	Hemicentin-1
A2.transcripts:Locus_3_Transcript_60441_70181_Confidence_0.000_Length_5725	Anisakis	A0A0M3K3A2	64.4	801	0.0	0.0345280076377868	10.2427	TrEMBL	A0A0M3K3A2_ANISI	NA	876	NA	ASIM_LOCUS14849	Anisakis simplex	ShKT domain-containing protein
A2.transcripts:Locus_785_Transcript_7_61_Confidence_0.070_Length_2205	Anisakis	A0A0N5CRL2	63.6	220	1.27e-89	0.0383485337487358	10.239	TrEMBL	A0A0N5CRL2_THECL	NA	394	NA	TCLT_LOCUS2863	Thelazia callipaeda	BPI2 domain-containing protein
A2.transcripts:Locus_24316_Transcript_10_13_Confidence_0.591_Length_3557	Anisakis	CTP82109.1	51.8	919	3.11e-286	8.60227057784162e-10	10.2351	Nr	CTP82109	Bm12922 [Brugia malayi]	1106	INV	Bm12922	Brugia malayi	Bm12922
A0.A1.NODE_33788_length_436_cov_2.514905_g19982_i0	Anisakis	A0A0M3KGG7	79.8	94	1.08e-32	0.000142990068268751	10.2334	TrEMBL	A0A0M3KGG7_ANISI	NA	227	NA	ASIM_LOCUS19466	Anisakis simplex	Col_cuticle_N domain-containing protein
A2.transcripts:Locus_7367_Transcript_6_32_Confidence_0.175_Length_2966	Anisakis	A0A0M3JXA9	100	638	0.0	0.0372498645788009	10.2243	TrEMBL	A0A0M3JXA9_ANISI	NA	638	NA	ASIM_LOCUS12441	Anisakis simplex	HECT-type E3 ubiquitin transferase
A2.transcripts:Locus_20857_Transcript_1_1_Confidence_0.000_Length_2020	Anisakis	A0A0M3JRM4	99.5	429	3.30e-306	4.62326448762968e-07	10.2094	TrEMBL	A0A0M3JRM4_ANISI	NA	429	NA	ASIM_LOCUS10124	Anisakis simplex	PALP domain-containing protein
A0.A2.NODE_24864_length_233_cov_66.568627_g23676_i0	Anisakis	KHN79588.1	88.3	77	1.29e-42	2.20006165246031e-09	10.2029	Nr	KHN79588	Hemicentin-1, partial [Toxocara canis]	1555	INV	HMCN1	Toxocara canis	Hemicentin-1
A2.transcripts:Locus_2557_Transcript_3_8_Confidence_0.400_Length_4213	Anisakis	KHN74523.1	55.6	633	4.75e-212	6.92338215727631e-08	10.1963	Nr	KHN74523	REST corepressor [Toxocara canis]	657	INV	CoRest	Toxocara canis	REST corepressor
A2.transcripts:Locus_1431_Transcript_12_12_Confidence_0.273_Length_3719	Anisakis	KHN71262.1	92.8	444	4.79e-245	1.10797180621972e-08	10.1708	Nr	KHN71262	Serine/threonine-protein kinase 10 [Toxocara canis]	1509	INV	STK10	Toxocara canis	Serine/threonine-protein kinase 10
A2.transcripts:Locus_20042_Transcript_9_13_Confidence_0.556_Length_683	Anisakis	KHN84285.1	91.7	72	1.76e-37	2.56422550164324e-06	10.1702	Nr	KHN84285	General transcription factor IIH subunit 5 [Toxocara canis]	132	INV	GTF2H5	Toxocara canis	General transcription factor IIH subunit 5
A2.transcripts:Locus_3_Transcript_41969_70181_Confidence_0.000_Length_6282	Anisakis	A0A158PNT8	99.6	683	0.0	5.28493552271043e-09	10.1634	TrEMBL	A0A158PNT8_ANISI	NA	1416	NA	NA	Anisakis simplex	Phospholipid-transporting ATPase
A2.transcripts:Locus_3781_Transcript_41_51_Confidence_0.215_Length_1421	Anisakis	KHN78876.1	61.5	91	2.83e-24	3.62478303557604e-07	10.1546	Nr	KHN78876	Ubiquitin-like modifier-activating enzyme 5 [Toxocara canis]	337	INV	NA	Toxocara canis	Ubiquitin-like modifier-activating enzyme 5
A0.A5.NODE_12585_length_1885_cov_18.538545_g5612_i0	Anisakis	KHN72937.1	68.7	380	2.89e-174	0.0418166604958583	10.1408	Nr	KHN72937	UNC93-like protein MFSD11 [Toxocara canis]	407	INV	MFSD11	Toxocara canis	UNC93-like protein MFSD11
A2.transcripts:Locus_109_Transcript_53_70_Confidence_0.484_Length_2117	Anisakis	A0A097IYH5	77.9	285	2.38e-136	0.0431671973711083	10.1265	TrEMBL	A0A097IYH5_ANISI	NA	340	NA	GPDH	Anisakis simplex	Glyceraldehyde-3-phosphate dehydrogenase
A2.transcripts:Locus_1942_Transcript_3_5_Confidence_0.389_Length_2513	Anisakis	A0A0M3K252	100	148	1.84e-69	1.73062486880124e-07	10.1176	TrEMBL	A0A0M3K252_ANISI	NA	293	NA	ASIM_LOCUS14388	Anisakis simplex	Col_cuticle_N domain-containing protein
A2.transcripts:Locus_237_Transcript_78_237_Confidence_0.042_Length_1359	Anisakis	Q9D1I5.1	86.2	29	1.02e-09	0.039481505651829	10.1128	Swiss-Prot	MCEE_MOUSE	RecName: Full=Methylmalonyl-CoA epimerase, mitochondrial; AltName: Full=DL-methylmalonyl-CoA racemase; Flags: Precursor	178	ROD	NA	Mus musculus	Methylmalonyl-CoA epimerase, mitochondrial
A2.transcripts:Locus_1_Transcript_55635_107551_Confidence_0.000_Length_2778	Anisakis	A0A0M3JQS6	98.2	226	1.59e-124	0.0413631609772792	10.0774	TrEMBL	A0A0M3JQS6_ANISI	NA	370	NA	ASIM_LOCUS9763	Anisakis simplex	Nuclear transcription factor Y subunit
A2.transcripts:Locus_77_Transcript_170_235_Confidence_0.001_Length_547	Anisakis	A0A0M3JYK8	97.2	109	1.14e-67	3.36900144010512e-07	10.0766	TrEMBL	A0A0M3JYK8_ANISI	NA	542	NA	ASIM_LOCUS12965	Anisakis simplex	COesterase domain-containing protein
A2.transcripts:Locus_139_Transcript_65_209_Confidence_0.050_Length_3388	Anisakis	A0A0M3K107	78.8	910	0.0	2.19349724639947e-08	10.072	TrEMBL	A0A0M3K107_ANISI	NA	952	NA	ASIM_LOCUS13940	Anisakis simplex	TLDc domain-containing protein
A2.transcripts:Locus_95_Transcript_46_71_Confidence_0.121_Length_2568	Anisakis	A0A0M3JYK8	95.8	334	2.77e-223	8.6002668230299e-09	10.0677	TrEMBL	A0A0M3JYK8_ANISI	NA	542	NA	ASIM_LOCUS12965	Anisakis simplex	COesterase domain-containing protein
A2.transcripts:Locus_960_Transcript_34_47_Confidence_0.259_Length_1557	Anisakis	A0A3P7IBV4	77.3	335	6.37e-196	5.62816893999334e-05	10.0658	TrEMBL	A0A3P7IBV4_TOXCA	NA	518	NA	TCNE_LOCUS13697	Toxocara canis	Metalloendopeptidase
A2.transcripts:Locus_4_Transcript_785_21802_Confidence_0.002_Length_10625	Anisakis	A0A0M3IY25	79.5	657	4.64e-195	1.44541437204002e-07	10.0602	TrEMBL	A0A0M3IY25_ANISI	NA	655	NA	ASIM_LOCUS53	Anisakis simplex	ANK_REP_REGION domain-containing protein
A2.transcripts:Locus_1341_Transcript_52_87_Confidence_0.291_Length_5505	Anisakis	AZA15237.1	100	687	0.0	0.0373753665150173	10.0581	Nr	AZA15237	vacuolar protein sorting-associated protein 11 homolog [Anisakis pegreffii]	758	INV	vps-11	Anisakis pegreffii	vacuolar protein sorting-associated protein 11 homolog
A2.transcripts:Locus_3_Transcript_17544_70181_Confidence_0.000_Length_1441	Anisakis	CAB50767.1	90.9	99	2.11e-49	2.3513835531958e-05	10.0475	Nr	CAB50767	putative cuticular collagen protein [Ascaris suum]	288	INV	col-C	Ascaris suum	putative cuticular collagen protein
A0.A2.NODE_9262_length_519_cov_123.557143_g6318_i2	Anisakis	A0A1I9GBC1	79.8	109	2.66e-63	1.86711469229843e-08	10.0185	TrEMBL	A0A1I9GBC1_BRUMA	NA	124	NA	Bm12431	Brugia malayi	Metalloendopeptidase
A2.transcripts:Locus_867_Transcript_4_73_Confidence_0.260_Length_984	Anisakis	F1KPY0	73.9	46	4.09e-13	6.31493304333794e-07	10.0116	TrEMBL	F1KPY0_ASCSU	NA	2012	NA	NA	Ascaris suum	Carboxypeptidase
A2.transcripts:Locus_3834_Transcript_7_25_Confidence_0.296_Length_3202	Anisakis	A0A0M3JU73	92.2	681	0.0	0.0383388958467007	10.0111	TrEMBL	A0A0M3JU73_ANISI	NA	651	NA	ASIM_LOCUS11179	Anisakis simplex	Phosphoenolpyruvate carboxykinase (GTP)
A0.A1.NODE_15506_length_1600_cov_38.061970_g4883_i1	Anisakis	CDP90898.1	76.5	200	1.56e-103	0.0429208505030556	10.0098	Nr	CDP90898	Bm3891, isoform a [Brugia malayi]	202	INV	Bm3891	Brugia malayi	Bm3891, isoform a
A2.transcripts:Locus_1580_Transcript_9_21_Confidence_0.250_Length_1461	Anisakis	A0A0B2W1F3	79.5	239	3.79e-139	0.0384786431501411	10.0065	TrEMBL	A0A0B2W1F3_TOXCA	NA	238	NA	Pgls	Toxocara canis	6-phosphogluconolactonase
A2.transcripts:Locus_468_Transcript_12_26_Confidence_0.265_Length_1382	Anisakis	A0A0M3ID39	49.5	206	7.14e-57	0.042180364181677	10.0037	TrEMBL	A0A0M3ID39_ASCLU	NA	381	NA	NA	Ascaris lumbricoides	CRAL-TRIO domain-containing protein
A2.transcripts:Locus_4198_Transcript_27_32_Confidence_0.585_Length_2723	Anisakis	A0A0M3IFG5	62.3	668	1.14e-279	0.0386202742246254	9.99924	TrEMBL	A0A0M3IFG5_ASCLU	NA	622	NA	NA	Ascaris lumbricoides	TROVE domain-containing protein
A2.transcripts:Locus_1511_Transcript_47_66_Confidence_0.176_Length_2788	Anisakis	KHN85057.1	72.3	484	1.46e-226	0.0409391515647667	9.99766	Nr	KHN85057	Otopetrin-1 [Toxocara canis]	675	INV	OTOP1	Toxocara canis	Otopetrin-1
A2.transcripts:Locus_3_Transcript_10144_70181_Confidence_0.000_Length_2595	Anisakis	A0A0N4Z514	28.7	352	6.62e-37	5.36511574459066e-08	9.9885	TrEMBL	A0A0N4Z514_PARTI	NA	872	NA	NA	Parastrongyloides trichosuri	Glucuronosyltransferase
A1.A4.J2423925	Anisakis	KHN72673.1	51.6	93	7.31e-26	0.000588996720559862	9.98686	Nr	KHN72673	Cytochrome P450 4C1 [Toxocara canis]	538	INV	CYP4C1	Toxocara canis	Cytochrome P450 4C1
A2.transcripts:Locus_687_Transcript_24_47_Confidence_0.269_Length_3324	Anisakis	A0A0B2VNP7	50.4	492	9.52e-151	0.0417279783241992	9.97753	TrEMBL	A0A0B2VNP7_TOXCA	NA	629	NA	fam208a	Toxocara canis	DUF3715 domain-containing protein
A2.transcripts:Locus_280_Transcript_37_64_Confidence_0.370_Length_8504	Anisakis	KHN79265.1	57.1	2578	0.0	3.57100451770388e-09	9.96116	Nr	KHN79265	Nucleoprotein TPR [Toxocara canis]	2382	INV	TPR	Toxocara canis	Nucleoprotein TPR
A2.transcripts:Locus_960_Transcript_7_47_Confidence_0.241_Length_1123	Anisakis	A0A0B2V5B1	59.1	235	2.29e-80	3.84829252468247e-08	9.95276	TrEMBL	A0A0B2V5B1_TOXCA	NA	620	NA	nas-30	Toxocara canis	Metalloendopeptidase
A0.A5.NODE_25325_length_961_cov_5.494553_g9536_i1	Anisakis	KHN88251.1	51.1	137	5.29e-31	5.54343262857883e-05	9.95138	Nr	KHN88251	Methyltransferase-like protein 13 [Toxocara canis]	365	INV	METTL13	Toxocara canis	Methyltransferase-like protein 13
A0.A0.NODE_17312_length_895_cov_12.123810_g9944_i0	Anisakis	A0A0M3KBB4	93.0	143	4.95e-87	0.0444403185929573	9.94421	TrEMBL	A0A0M3KBB4_ANISI	Non-canonical purine NTP pyrophosphatase	214	NA	ASIM_LOCUS17662	Anisakis simplex	Inosine triphosphate pyrophosphatase
A2.transcripts:Locus_3007_Transcript_32_46_Confidence_0.225_Length_1006	Anisakis	A0A0M3I2K1	34.9	166	4.06e-18	1.84976266690971e-06	9.93925	TrEMBL	A0A0M3I2K1_ASCLU	NA	290	NA	NA	Ascaris lumbricoides	Glycine N-acyltransferase-like protein
A2.transcripts:Locus_3_Transcript_55783_70181_Confidence_0.000_Length_1325	Anisakis	KHN70839.1	51.0	245	6.61e-49	8.71068164996378e-09	9.92546	Nr	KHN70839	Coiled-coil domain-containing protein 6 [Toxocara canis]	686	INV	CCDC6	Toxocara canis	Coiled-coil domain-containing protein 6
A2.transcripts:Locus_785_Transcript_45_87_Confidence_0.065_Length_823	Anisakis	KHN87939.1	42.0	100	1.22e-18	2.61580932254454e-06	9.9191	Nr	KHN87939	Leucine-rich repeat protein 1 [Toxocara canis]	552	INV	LRR1	Toxocara canis	Leucine-rich repeat protein 1
A2.transcripts:Locus_3_Transcript_10568_70181_Confidence_0.000_Length_893	Anisakis	F1L006	100	108	1.51e-62	1.40989712286595e-06	9.91719	TrEMBL	F1L006_ASCSU	Vacuolar proton pump subunit B	501	NA	NA	Ascaris suum	Vacuolar proton pump subunit B
A2.transcripts:Locus_12355_Transcript_5_34_Confidence_0.333_Length_1024	Anisakis	KHN72673.1	81.5	178	1.63e-99	0.0468851536874056	9.917	Nr	KHN72673	Cytochrome P450 4C1 [Toxocara canis]	538	INV	CYP4C1	Toxocara canis	Cytochrome P450 4C1
A2.transcripts:Locus_4_Transcript_365_510_Confidence_0.007_Length_2514	Anisakis	KHN79527.1	41.4	191	1.21e-10	1.73784754465789e-08	9.89864	Nr	KHN79527	Cuticle collagen dpy-5 [Toxocara canis]	1172	INV	dpy-5	Toxocara canis	Cuticle collagen dpy-5
A2.transcripts:Locus_5109_Transcript_4_16_Confidence_0.472_Length_1408	Anisakis	KHN82296.1	81.5	335	9.86e-184	0.0482171931805756	9.85443	Nr	KHN82296	Putative 28S ribosomal protein S5, mitochondrial [Toxocara canis]	434	INV	mrps-5	Toxocara canis	putative 28S ribosomal protein S5, mitochondrial
A2.transcripts:Locus_1_Transcript_23571_107551_Confidence_0.000_Length_3085	Anisakis	A0A158PNG9	68.2	472	1.89e-134	0.0495103777032898	9.8492	TrEMBL	A0A158PNG9_ANISI	NA	937	NA	ASIM_LOCUS11440	Anisakis simplex	PCM1_C domain-containing protein
A2.transcripts:Locus_1216_Transcript_4_5_Confidence_0.500_Length_2011	Anisakis	A0A0M3JRI8	98.9	188	1.00e-114	6.19967078389085e-12	9.84862	TrEMBL	A0A0M3JRI8_ANISI	NA	478	NA	ASIM_LOCUS10082	Anisakis simplex	Ground-like domain-containing protein
A2.transcripts:Locus_1341_Transcript_44_87_Confidence_0.291_Length_5709	Anisakis	AZA15237.1	100	758	0.0	0.0459942893050006	9.84542	Nr	AZA15237	vacuolar protein sorting-associated protein 11 homolog [Anisakis pegreffii]	758	INV	vps-11	Anisakis pegreffii	vacuolar protein sorting-associated protein 11 homolog
A2.transcripts:Locus_1061_Transcript_109_182_Confidence_0.053_Length_3100	Anisakis	A0A0M3JU50	76.0	221	4.95e-35	0.0428234312783024	9.84513	TrEMBL	A0A0M3JU50_ANISI	NA	1001	NA	ASIM_LOCUS11154	Anisakis simplex	Dual-specificity kinase
A2.transcripts:Locus_11254_Transcript_6_24_Confidence_0.200_Length_1544	Anisakis	CDP91065.1	55.3	253	9.99e-65	1.56440643314078e-08	9.82999	Nr	CDP91065	Bm1793 [Brugia malayi]	479	INV	Bm1793	Brugia malayi	Bm1793
A2.transcripts:Locus_1150_Transcript_13_16_Confidence_0.429_Length_4163	Anisakis	A0A4E9FH40	60.8	1162	0.0	0.0480627257981066	9.82499	TrEMBL	A0A4E9FH40_BRUMA	NA	1112	NA	Bma-tom-1	Brugia malayi	LLGL domain-containing protein
A2.transcripts:Locus_366_Transcript_99_122_Confidence_0.089_Length_1807	Anisakis	KHN72013.1	53.9	304	9.83e-105	0.0439936050496608	9.82483	Nr	KHN72013	Kelch domain-containing protein 10 [Toxocara canis]	408	INV	klhdc10	Toxocara canis	Kelch domain-containing protein 10
A0.A5.NODE_4670_length_3095_cov_101.788008_g2278_i0	Anisakis	A0A0M3K845	59.4	621	5.87e-205	1.8152304734798e-06	9.82231	TrEMBL	A0A0M3K845_ANISI	NA	550	NA	NA	Anisakis simplex	Flavin-containing monooxygenase
A2.transcripts:Locus_17592_Transcript_13_35_Confidence_0.178_Length_857	Anisakis	A0A0M3IZH2	99.4	158	2.12e-107	1.90619730769313e-08	9.81405	TrEMBL	A0A0M3IZH2_ANISI	NA	361	NA	ASIM_LOCUS555	Anisakis simplex	FA_desaturase domain-containing protein
A2.transcripts:Locus_3_Transcript_32427_70181_Confidence_0.000_Length_7749	Anisakis	A0A0B2V8D3	83.5	406	4.57e-236	2.57814376040432e-06	9.80191	TrEMBL	A0A0B2V8D3_TOXCA	NA	440	NA	T01C8.5	Toxocara canis	Aspartate aminotransferase
A2.transcripts:Locus_1_Transcript_48910_107551_Confidence_0.000_Length_552	Anisakis	A0A0B2VCP9	44.1	68	1.92e-08	2.84874545067053e-06	9.77856	TrEMBL	A0A0B2VCP9_TOXCA	NA	759	NA	Tcan_01936	Toxocara canis	CCHC-type domain-containing protein
A0.A6.NODE_3338_length_2927_cov_50.344375_g1794_i1	Anisakis	KHN76608.1	32.5	499	4.30e-53	0.0441083088634121	9.77725	Nr	KHN76608	Crossover junction endonuclease MUS81 [Toxocara canis]	567	INV	mus81	Toxocara canis	Crossover junction endonuclease MUS81
A2.transcripts:Locus_3_Transcript_27508_70181_Confidence_0.000_Length_2703	Anisakis	KHN74014.1	72.9	432	2.34e-204	1.01488526419019e-07	9.77107	Nr	KHN74014	Heterogeneous nuclear ribonucleoprotein F [Toxocara canis]	429	INV	HNRNPF	Toxocara canis	Heterogeneous nuclear ribonucleoprotein F
A2.transcripts:Locus_994_Transcript_10_20_Confidence_0.565_Length_3734	Anisakis	ACC68843.1	98.0	561	0.0	0.0477346492655183	9.76888	Nr	ACC68843	calcium-activated potassium channel [Parascaris equorum]	1108	INV	slo-1	Parascaris equorum	calcium-activated potassium channel
A0.A1.NODE_13908_length_1767_cov_2414.097647_g6249_i1	Anisakis	A0A0M3K913	100	73	2.46e-39	0.0490024278614943	9.76813	TrEMBL	A0A0M3K913_ANISI	NA	143	NA	ASIM_LOCUS16861	Anisakis simplex	Col_cuticle_N domain-containing protein
A2.transcripts:Locus_413_Transcript_49_69_Confidence_0.315_Length_3709	Anisakis	KHN85848.1	52.2	925	7.41e-111	0.045120331443559	9.76545	Nr	KHN85848	Hemicentin-1 [Toxocara canis]	1056	INV	HMCN1	Toxocara canis	Hemicentin-1
A2.transcripts:Locus_1408_Transcript_15_26_Confidence_0.459_Length_1058	Anisakis	KHN84192.1	90.6	139	3.67e-91	0.0438326262621911	9.76531	Nr	KHN84192	putative 39S ribosomal protein L35, mitochondrial [Toxocara canis]	177	INV	mrpl-35	Toxocara canis	putative 39S ribosomal protein L35, mitochondrial
A2.transcripts:Locus_960_Transcript_45_47_Confidence_0.204_Length_1983	Anisakis	A0A3P7IBV4	78.1	374	1.12e-220	1.90026874339186e-08	9.76327	TrEMBL	A0A3P7IBV4_TOXCA	NA	518	NA	TCNE_LOCUS13697	Toxocara canis	Metalloendopeptidase
A2.transcripts:Locus_3479_Transcript_29_57_Confidence_0.136_Length_2904	Anisakis	KHN75156.1	70.9	327	3.90e-138	0.0496300799336816	9.75033	Nr	KHN75156	Signal transducing adapter molecule 1 [Toxocara canis]	453	INV	stam-1	Toxocara canis	Signal transducing adapter molecule 1
A2.transcripts:Locus_18789_Transcript_16_27_Confidence_0.171_Length_819	Anisakis	KHN79384.1	90.2	133	4.55e-74	0.045237316146446	9.74023	Nr	KHN79384	Septin-8-A [Toxocara canis]	247	INV	sept8-a	Toxocara canis	Septin-8-A
A2.transcripts:Locus_17135_Transcript_1_4_Confidence_0.500_Length_2183	Anisakis	KHN76106.1	63.6	376	9.20e-171	4.23041524113487e-06	9.73471	Nr	KHN76106	SEC14-like protein 2 [Toxocara canis]	395	INV	SEC14L2	Toxocara canis	SEC14-like protein 2
A2.transcripts:Locus_7744_Transcript_3_20_Confidence_0.243_Length_3915	Anisakis	A0A0M3I4R8	84.4	429	1.13e-190	0.0472056891347516	9.72641	TrEMBL	A0A0M3I4R8_ASCLU	NA	520	NA	NA	Ascaris lumbricoides	PWI domain-containing protein
A2.transcripts:Locus_3_Transcript_64552_70181_Confidence_0.000_Length_3189	Anisakis	KHN79288.1	56.9	471	5.26e-161	0.0498445395340979	9.70952	Nr	KHN79288	Nucleoside-diphosphatase mig-23 [Toxocara canis]	597	INV	mig-23	Toxocara canis	Nucleoside-diphosphatase mig-23
A2.transcripts:Locus_4307_Transcript_18_48_Confidence_0.532_Length_3945	Anisakis	A0A0M3IYX2	99.2	626	0.0	9.85505730017934e-07	9.70233	TrEMBL	A0A0M3IYX2_ANISI	NA	668	NA	ASIM_LOCUS355	Anisakis simplex	RRM domain-containing protein
A2.transcripts:Locus_14315_Transcript_12_14_Confidence_0.538_Length_2386	Anisakis	A0A0M3IYS1	86.4	624	0.0	5.28607438044561e-07	9.6813	TrEMBL	A0A0M3IYS1_ANISI	NA	543	NA	ASIM_LOCUS304	Anisakis simplex	Metalloendopeptidase
A2.transcripts:Locus_367_Transcript_7_12_Confidence_0.533_Length_2309	Anisakis	KHN81420.1	74.9	593	0.0	2.48304733207711e-30	9.66462	Nr	KHN81420	Zinc metalloproteinase nas-36, partial [Toxocara canis]	577	INV	nas-36	Toxocara canis	Zinc metalloproteinase nas-36
A2.transcripts:Locus_795_Transcript_4_33_Confidence_0.391_Length_1455	Anisakis	CDJ95917.1	57.1	91	2.21e-25	2.68335802323862e-06	9.65449	Nr	CDJ95917	Protein F48C1.6 [Haemonchus contortus]	226	INV	NA	Haemonchus contortus	Protein F48C1.6
A2.transcripts:Locus_5240_Transcript_14_17_Confidence_0.238_Length_1870	Anisakis	KHN83246.1	71.7	392	2.67e-220	3.36660962758792e-08	9.65312	Nr	KHN83246	IgGFc-binding protein [Toxocara canis]	929	INV	FCGBP	Toxocara canis	IgGFc-binding protein
A2.transcripts:Locus_3_Transcript_16818_70181_Confidence_0.000_Length_5057	Anisakis	CRZ26112.1	54.9	1040	1.01e-283	2.62862276548953e-06	9.64663	Nr	CRZ26112	Bm3289, partial [Brugia malayi]	1020	INV	Bm3289	Brugia malayi	Bm3289
A2.transcripts:Locus_186_Transcript_13_18_Confidence_0.423_Length_1829	Anisakis	RCN49675.1	48.5	136	1.58e-23	0.000382753763410557	9.64276	Nr	RCN49675	transporter, major facilitator family protein [Ancylostoma caninum]	507	INV	NA	Ancylostoma caninum	transporter, major facilitator family protein
A0.A4.NODE_3661_length_3401_cov_54.949405_g806_i1	Anisakis	A0A498SA98	44.9	205	1.12e-49	1.23282782602369e-06	9.63928	TrEMBL	A0A498SA98_ACAVI	NA	1421	NA	NAV_LOCUS3491	Acanthocheilonema viteae	FYVE-type domain-containing protein
A1.A1.R3361047	Anisakis	KHN86693.1	51.7	232	2.08e-72	0.0123765306210106	9.61528	Nr	KHN86693	BTB/POZ domain-containing adapter for CUL3-mediated RhoA degradation protein 3 [Toxocara canis]	236	INV	KCTD10	Toxocara canis	BTB/POZ domain-containing adapter for CUL3-mediated RhoA degradation protein 3
A2.transcripts:Locus_19896_Transcript_25_36_Confidence_0.147_Length_1306	Anisakis	A0A0B2V2N7	80.4	112	9.75e-55	0.000733914650842897	9.61161	TrEMBL	A0A0B2V2N7_TOXCA	NA	112	NA	TOMM22	Toxocara canis	Mitochondrial import receptor subunit TOM22 homolog
A2.transcripts:Locus_4_Transcript_8401_21802_Confidence_0.001_Length_5784	Anisakis	Q964E2.1	62.2	378	1.79e-130	5.36511574459066e-08	9.59751	Swiss-Prot	ACTC_BIOPF	RecName: Full=Actin, cytoplasmic; Contains: RecName: Full=Actin, cytoplasmic, intermediate form; Flags: Precursor	376	INV	NA	Biomphalaria pfeifferi	Actin, cytoplasmic
A2.transcripts:Locus_1307_Transcript_113_139_Confidence_0.104_Length_4165	Anisakis	A0A158PN86	97.8	410	3.19e-265	2.19983080880684e-07	9.59385	TrEMBL	A0A158PN86_ANISI	NA	424	NA	ASIM_LOCUS10852	Anisakis simplex	Obg-like ATPase 1
A2.transcripts:Locus_12355_Transcript_8_34_Confidence_0.111_Length_442	Anisakis	CDQ06587.1	75.0	52	1.58e-13	0.000114241558511051	9.59379	Nr	CDQ06587	Bm8265, partial [Brugia malayi]	190	INV	Bm8265	Brugia malayi	Bm8265
A2.transcripts:Locus_4488_Transcript_14_21_Confidence_0.500_Length_2805	Anisakis	KHN82443.1	60.3	224	7.91e-74	4.73690280095553e-14	9.5936	Nr	KHN82443	Epidermal growth factor receptor kinase substrate 8-like protein 3 [Toxocara canis]	617	INV	Eps8l3	Toxocara canis	Epidermal growth factor receptor kinase substrate 8-like protein 3
A0.A2.NODE_11259_length_444_cov_2627.424096_g10076_i0	Anisakis	A0A0M3ISY3	65.5	148	4.25e-60	7.69973699277087e-09	9.57579	TrEMBL	A0A0M3ISY3_ASCLU	NA	219	NA	NA	Ascaris lumbricoides	Aminotran_1_2 domain-containing protein
A2.transcripts:Locus_3_Transcript_60357_70181_Confidence_0.000_Length_6872	Anisakis	A0A0M3K6A8	86.0	550	2.21e-299	4.15364952580625e-06	9.56002	TrEMBL	A0A0M3K6A8_ANISI	NA	489	NA	ASIM_LOCUS15906	Anisakis simplex	DNA_mis_repair domain-containing protein
A0.A1.NODE_3418_length_3711_cov_125.660538_g1778_i0	Anisakis	A0A0B2VZE0	44.8	829	2.18e-203	8.45674594802726e-08	9.54009	TrEMBL	A0A0B2VZE0_TOXCA	Autophagy-related protein 7	708	NA	Atg7	Toxocara canis	Ubiquitin-like modifier-activating enzyme ATG7
A2.transcripts:Locus_1667_Transcript_2_59_Confidence_0.009_Length_1023	Anisakis	A0A0M3IZK1	100	164	3.06e-109	1.17787716421052e-07	9.53544	TrEMBL	A0A0M3IZK1_ANISI	NA	372	NA	ASIM_LOCUS584	Anisakis simplex	Piezo_RRas_bdg domain-containing protein
A2.transcripts:Locus_5441_Transcript_1_11_Confidence_0.100_Length_420	Anisakis	A0A0M3JUW3	57.7	97	8.72e-24	1.50456409197708e-06	9.53349	TrEMBL	A0A0M3JUW3_ANISI	NA	278	NA	ASIM_LOCUS11457	Anisakis simplex	Col_cuticle_N domain-containing protein
A0.A5.NODE_24940_length_982_cov_4.391906_g10726_i0	Anisakis	CRZ25346.1	46.1	271	1.40e-82	0.000747022192890939	9.53281	Nr	CRZ25346	Bm5648 [Brugia malayi]	360	INV	Bm5648	Brugia malayi	Bm5648
A2.transcripts:Locus_82_Transcript_27_42_Confidence_0.524_Length_3650	Anisakis	A0A0M3JVU4	83.9	552	1.71e-312	2.06661478100709e-06	9.52628	TrEMBL	A0A0M3JVU4_ANISI	NA	738	NA	ASIM_LOCUS11826	Anisakis simplex	WD_REPEATS_REGION domain-containing protein
A0.A5.NODE_29980_length_743_cov_5.451429_g13631_i0	Anisakis	VIO99430.1	66.0	206	1.43e-97	5.49368730932876e-06	9.52166	Nr	VIO99430	conserved hypothetical protein,hypothetical protein [Brugia malayi]	1053	INV	Bm8591	Brugia malayi	conserved hypothetical protein,hypothetical protein
A2.transcripts:Locus_13631_Transcript_5_6_Confidence_0.500_Length_1194	Anisakis	A0A0M3JSM8	87.0	154	2.01e-91	0.00167590989410276	9.52034	TrEMBL	A0A0M3JSM8_ANISI	NA	217	NA	ASIM_LOCUS10547	Anisakis simplex	DB domain-containing protein
A2.transcripts:Locus_291_Transcript_41_48_Confidence_0.328_Length_4028	Anisakis	AXS78258.1	93.2	440	6.59e-273	4.5507153117013e-08	9.49447	Nr	AXS78258	glycogenin-2 [Anisakis simplex]	440	INV	gyg2	Anisakis simplex	glycogenin-2
A2.transcripts:Locus_4_Transcript_472_510_Confidence_0.037_Length_10463	Anisakis	XP_003139840.1	57.8	472	2.14e-158	2.88805332069719e-11	9.49413	Nr	XP_003139840	MOFRL family protein [Loa loa]	472	INV	NA	Loa loa	MOFRL family protein
A2.transcripts:Locus_311_Transcript_21_64_Confidence_0.297_Length_2095	Anisakis	APG31414.1	98.4	122	3.39e-70	2.90624046125866e-05	9.48672	Nr	APG31414	myophilin, partial [Anisakis simplex]	169	INV	NA	Anisakis simplex	myophilin
A2.transcripts:Locus_2321_Transcript_21_37_Confidence_0.222_Length_2538	Anisakis	F1KWG2	71.3	279	1.28e-128	4.00905745072181e-08	9.44611	TrEMBL	F1KWG2_ASCSU	NA	641	NA	NA	Ascaris suum	DNA polymerase kappa
A2.transcripts:Locus_2821_Transcript_8_11_Confidence_0.647_Length_1476	Anisakis	KJH42423.1	68.9	193	2.84e-62	2.98594843327841e-07	9.42833	Nr	KJH42423	nematode cuticle collagen domain protein [Dictyocaulus viviparus]	332	INV	NA	Dictyocaulus viviparus	nematode cuticle collagen domain protein
A2.transcripts:Locus_3607_Transcript_7_25_Confidence_0.672_Length_5228	Anisakis	VIO89928.1	61.9	247	2.57e-73	2.9784829676712e-07	9.38214	Nr	VIO89928	Salivary glue protein Sgs-3 precursor, putative [Brugia malayi]	1382	INV	Bm4637	Brugia malayi	Salivary glue protein Sgs-3 precursor, putative
A2.transcripts:Locus_3_Transcript_21274_70181_Confidence_0.000_Length_610	Anisakis	KHN74592.1	89.4	47	1.64e-18	0.00069523657063109	9.37321	Nr	KHN74592	Putative serine protease K12H4.7, partial [Toxocara canis]	1661	INV	K12H4.7	Toxocara canis	putative serine protease K12H4.7
A2.transcripts:Locus_29368_Transcript_4_34_Confidence_0.152_Length_1159	Anisakis	CTP81523.1	58.3	216	1.08e-75	6.02814192425844e-08	9.36703	Nr	CTP81523	BMA-LIPS-9 [Brugia malayi]	262	INV	Bma-lips-9	Brugia malayi	BMA-LIPS-9
A2.transcripts:Locus_18595_Transcript_68_91_Confidence_0.086_Length_2404	Anisakis	A0A0M3JYA2	93.7	378	9.51e-173	2.8585484298193e-06	9.365	TrEMBL	A0A0M3JYA2_ANISI	NA	588	NA	ASIM_LOCUS12836	Anisakis simplex	BZIP domain-containing protein
A2.transcripts:Locus_575_Transcript_49_56_Confidence_0.447_Length_1889	Anisakis	A0A0M3KBX3	83.5	340	3.11e-167	2.53329460243106e-07	9.35739	TrEMBL	A0A0M3KBX3_ANISI	NA	532	NA	ASIM_LOCUS17871	Anisakis simplex	Coronin
A2.transcripts:Locus_7814_Transcript_2_6_Confidence_0.524_Length_1183	Anisakis	KHN79206.1	57.3	211	6.22e-68	0.000106648052848974	9.35504	Nr	KHN79206	Cuticlin-1, partial [Toxocara canis]	342	INV	cut-1	Toxocara canis	Cuticlin-1
A0.A6.NODE_1568_length_3922_cov_50.610840_g1003_i0	Anisakis	AZA15233.1	91.0	199	1.02e-115	2.03347437864601e-06	9.35288	Nr	AZA15233	alpha-1,3-mannosyl-glycoprotein 4-beta-N-acetylglucosaminyltransferase B [Anisakis pegreffii]	252	INV	mgat4b	Anisakis pegreffii	alpha-1,3-mannosyl-glycoprotein 4-beta-N-acetylglucosaminyltransferase B
A2.transcripts:Locus_4908_Transcript_15_22_Confidence_0.158_Length_738	Anisakis	KHN76656.1	73.9	138	6.46e-67	1.34503482201176e-06	9.34503	Nr	KHN76656	Carboxypeptidase B [Toxocara canis]	661	INV	NA	Toxocara canis	Carboxypeptidase B
A2.transcripts:Locus_10919_Transcript_1_16_Confidence_0.400_Length_393	Anisakis	A0A0M3KC03	95.7	70	1.56e-21	0.00119329945206163	9.34246	TrEMBL	A0A0M3KC03_ANISI	NA	285	NA	ASIM_LOCUS17901	Anisakis simplex	Ground-like domain-containing protein
A2.transcripts:Locus_7557_Transcript_68_78_Confidence_0.178_Length_1853	Anisakis	A0A0M3JTZ9	83.2	185	1.12e-95	1.2286178586368e-07	9.33821	TrEMBL	A0A0M3JTZ9_ANISI	NA	215	NA	ASIM_LOCUS11097	Anisakis simplex	ShKT domain-containing protein
A2.transcripts:Locus_4_Transcript_294_510_Confidence_0.007_Length_1985	Anisakis	KHN80325.1	56.2	178	8.08e-40	2.07276181495255e-05	9.32448	Nr	KHN80325	Cuticle collagen 13 [Toxocara canis]	353	INV	col-13	Toxocara canis	Cuticle collagen 13
A2.transcripts:Locus_165_Transcript_80_102_Confidence_0.123_Length_3680	Anisakis	A0A498SJ43	90.8	98	5.85e-49	1.64154503391629e-06	9.30926	TrEMBL	A0A498SJ43_ACAVI	NA	177	NA	NAV_LOCUS3952	Acanthocheilonema viteae	RRM domain-containing protein
A0.A1.NODE_5597_length_3020_cov_1606.194717_g2470_i1	Anisakis	CAB60108.1	62.7	346	1.51e-124	6.68434666000347e-05	9.27647	Nr	CAB60108	29kDa protein from Anisakis simplex	266	INV	iaa99-ASL3-11C	Anisakis simplex	29kDa protein from Anisakis simplex
A2.transcripts:Locus_175_Transcript_126_179_Confidence_0.014_Length_1352	Anisakis	KHN81016.1	96.6	290	2.88e-55	0.000321495095703013	9.27259	Nr	KHN81016	Putative cuticle collagen [Toxocara canis]	290	INV	col-155	Toxocara canis	putative cuticle collagen
A2.transcripts:Locus_8560_Transcript_3_6_Confidence_0.235_Length_889	Anisakis	A0A0M3KC03	75.0	232	6.23e-79	1.74289881164969e-06	9.24384	TrEMBL	A0A0M3KC03_ANISI	NA	285	NA	ASIM_LOCUS17901	Anisakis simplex	Ground-like domain-containing protein
A2.transcripts:Locus_4791_Transcript_22_23_Confidence_0.370_Length_2818	Anisakis	KHN73406.1	63.8	464	8.28e-208	8.93645884621738e-05	9.23491	Nr	KHN73406	Nose resistant to fluoxetine protein 6 [Toxocara canis]	672	INV	nrf-6	Toxocara canis	Nose resistant to fluoxetine protein 6
A1.A0.J3877841	Anisakis	QNG62055.1	67.8	149	3.25e-54	2.20086842887825e-06	9.23412	Nr	QNG62055	P-glycoprotein 2 [Parascaris univalens]	1287	INV	NA	Parascaris univalens	P-glycoprotein 2
A0.A2.NODE_2913_length_1103_cov_105.360335_g2452_i0	Anisakis	CRZ24893.1	52.9	87	2.41e-17	1.5185966308475e-06	9.23162	Nr	CRZ24893	Bm1688 [Brugia malayi]	271	INV	Bm1688	Brugia malayi	Bm1688
A2.transcripts:Locus_696_Transcript_45_115_Confidence_0.084_Length_761	Anisakis	PIO59213.1	54.6	97	7.74e-25	8.37837971937432e-07	9.23082	Nr	PIO59213	Transthyretin-like family protein, partial [Teladorsagia circumcincta]	111	INV	NA	Teladorsagia circumcincta	Transthyretin-like family protein
A2.transcripts:Locus_16526_Transcript_6_6_Confidence_0.000_Length_694	Anisakis	CRZ24217.1	31.4	118	1.04e-11	0.00030037582957466	9.21542	Nr	CRZ24217	Bm9822 [Brugia malayi]	177	INV	Bm9822	Brugia malayi	Bm9822
A1.A0.J3502537	Anisakis	A0A158PP95	84.2	101	3.77e-52	6.65329147601471e-07	9.18914	TrEMBL	A0A158PP95_ANISI	NA	1145	NA	ASIM_LOCUS13379	Anisakis simplex	Protein kinase domain-containing protein
A2.transcripts:Locus_3_Transcript_31944_70181_Confidence_0.000_Length_4137	Anisakis	A0A0M3JTK0	98.2	838	0.0	1.0041329676188e-07	9.16931	TrEMBL	A0A0M3JTK0_ANISI	NA	1194	NA	ASIM_LOCUS10922	Anisakis simplex	RNA polymerase II-associated factor 1 homolog
A0.A5.NODE_28870_length_789_cov_5.737265_g12934_i0	Anisakis	A0A0B2VFD6	77.9	77	2.93e-27	3.0688443952006e-05	9.14138	TrEMBL	A0A0B2VFD6_TOXCA	NA	450	NA	Tcan_13196	Toxocara canis	Neur_chan_LBD domain-containing protein
A2.transcripts:Locus_3_Transcript_65648_70181_Confidence_0.000_Length_2065	Anisakis	A0A0K0ECI7	34.7	167	9.06e-23	1.66072593160669e-06	9.13225	TrEMBL	A0A0K0ECI7_STRER	NA	403	NA	NA	Strongyloides stercoralis	Saposin B-type domain-containing protein
A2.transcripts:Locus_372_Transcript_1_22_Confidence_0.062_Length_452	Anisakis	A0A0M3KAU8	90.9	44	2.87e-18	0.00078997350861545	9.12596	TrEMBL	A0A0M3KAU8_ANISI	NA	574	NA	ASIM_LOCUS17496	Anisakis simplex	Bifunctional lysine-specific demethylase and histidyl-hydroxylase
A2.transcripts:Locus_6223_Transcript_6_10_Confidence_0.053_Length_499	Anisakis	KHN82667.1	76.3	139	8.37e-78	5.46320729971285e-06	9.12477	Nr	KHN82667	Prolyl carboxy peptidase like protein 5, partial [Toxocara canis]	509	INV	pcp-5	Toxocara canis	Prolyl carboxy peptidase like protein 5
A2.transcripts:Locus_1777_Transcript_30_49_Confidence_0.287_Length_4753	Anisakis	KHN70884.1	57.1	616	6.24e-195	2.35901923956259e-06	9.1089	Nr	KHN70884	Target of Myb protein 1 [Toxocara canis]	449	INV	Tom1	Toxocara canis	Target of Myb protein 1
A2.transcripts:Locus_209_Transcript_84_94_Confidence_0.076_Length_6492	Anisakis	CRZ22798.1	50.0	660	3.53e-146	9.24369500728925e-07	9.10811	Nr	CRZ22798	Bm5820, partial [Brugia malayi]	563	INV	Bm5820	Brugia malayi	Bm5820
A2.transcripts:Locus_19059_Transcript_12_15_Confidence_0.207_Length_1544	Anisakis	A0A0M3K9S4	76.4	331	4.18e-160	1.77022533239089e-06	9.10509	TrEMBL	A0A0M3K9S4_ANISI	NA	307	NA	ASIM_LOCUS17122	Anisakis simplex	Acyltransferase
A0.A2.NODE_6625_length_667_cov_128.023511_g734_i2	Anisakis	KHN76656.1	72.3	112	1.82e-51	0.000598735483248548	9.09253	Nr	KHN76656	Carboxypeptidase B [Toxocara canis]	661	INV	NA	Toxocara canis	Carboxypeptidase B
A2.transcripts:Locus_93_Transcript_21_25_Confidence_0.433_Length_3554	Anisakis	A0A0M3K515	84.6	1025	0.0	1.14924907861774e-19	9.09081	TrEMBL	A0A0M3K515_ANISI	NA	935	NA	ASIM_LOCUS15463	Anisakis simplex	BPI2 domain-containing protein
A2.transcripts:Locus_23635_Transcript_6_7_Confidence_0.583_Length_1477	Anisakis	KHN84360.1	65.5	287	1.13e-97	0.000384248180038085	9.08982	Nr	KHN84360	putative NADH dehydrogenase [ubiquinone] iron-sulfur protein 8, mitochondrial [Toxocara canis]	207	INV	T20H4.5	Toxocara canis	putative NADH dehydrogenase [ubiquinone] iron-sulfur protein 8, mitochondrial
A0.A5.NODE_29524_length_761_cov_17.295265_g3860_i5	Anisakis	KHN72673.1	44.7	170	4.22e-39	0.00213125746362166	9.08036	Nr	KHN72673	Cytochrome P450 4C1 [Toxocara canis]	538	INV	CYP4C1	Toxocara canis	Cytochrome P450 4C1
A2.transcripts:Locus_19965_Transcript_1_52_Confidence_0.269_Length_1199	Anisakis	A0A0M3JUB6	99.3	135	3.40e-78	1.45958578120797e-05	9.07498	TrEMBL	A0A0M3JUB6_ANISI	NA	1565	NA	ASIM_LOCUS11227	Anisakis simplex	MYND-type domain-containing protein
A2.transcripts:Locus_3_Transcript_7021_70181_Confidence_0.000_Length_1958	Anisakis	A0A0B2V9L8	66.8	512	6.93e-233	2.18425117977918e-06	9.06601	TrEMBL	A0A0B2V9L8_TOXCA	SMAD family member	425	NA	Mad	Toxocara canis	Mothers against decapentaplegic homolog
A2.transcripts:Locus_2149_Transcript_145_201_Confidence_0.092_Length_5110	Anisakis	KHN80194.1	41.4	1031	4.28e-206	1.46849023220996e-06	9.03671	Nr	KHN80194	Chromodomain-helicase-DNA-binding protein 1-like [Toxocara canis]	1096	INV	Chd1l	Toxocara canis	Chromodomain-helicase-DNA-binding protein 1-like
A2.transcripts:Locus_8857_Transcript_12_16_Confidence_0.429_Length_1645	Anisakis	KHN72938.1	43.1	343	6.55e-74	8.34736469751836e-06	9.03498	Nr	KHN72938	Calmodulin-like protein 5 [Toxocara canis]	247	INV	CALML5	Toxocara canis	Calmodulin-like protein 5
A0.A2.NODE_1463_length_1527_cov_1394.050067_g1216_i0	Anisakis	KHN72520.1	91.3	321	2.43e-213	2.43080643639317e-07	9.03016	Nr	KHN72520	Alanine aminotransferase 2 [Toxocara canis]	462	INV	gpt2	Toxocara canis	Alanine aminotransferase 2
A2.transcripts:Locus_6920_Transcript_18_22_Confidence_0.383_Length_2593	Anisakis	KHN72520.1	89.6	462	8.97e-310	1.86217636604982e-15	9.02529	Nr	KHN72520	Alanine aminotransferase 2 [Toxocara canis]	462	INV	gpt2	Toxocara canis	Alanine aminotransferase 2
A2.transcripts:Locus_1_Transcript_75613_107551_Confidence_0.000_Length_2101	Anisakis	A0A0M3K7C2	99.6	250	7.79e-169	0.000188514869636649	9.01378	TrEMBL	A0A0M3K7C2_ANISI	NA	320	NA	ASIM_LOCUS16271	Anisakis simplex	Annexin
A0.A5.NODE_17685_length_1445_cov_2280.228959_g7544_i0	Anisakis	KHN87196.1	56.2	185	2.16e-53	0.0432468051633689	9.01056	Nr	KHN87196	Phosphatidylethanolamine-binding -like protein F40A3.3 [Toxocara canis]	184	INV	F40A3.3	Toxocara canis	Phosphatidylethanolamine-binding -like protein F40A3.3
A0.A1.NODE_30351_length_544_cov_2.748428_g16584_i0	Anisakis	A0A0N4VK13	54.5	123	3.98e-46	2.99856163543826e-05	9.00494	TrEMBL	A0A0N4VK13_ENTVE	NA	159	NA	EVEC_LOCUS10509	Enterobius vermicularis	Phospholipase A2
A2.transcripts:Locus_57_Transcript_9_13_Confidence_0.696_Length_1519	Anisakis	A0A4E9ETT4	77.1	297	2.60e-54	8.9630146085431e-05	9.00352	TrEMBL	A0A4E9ETT4_BRUMA	NA	298	NA	Bm1714	Brugia malayi	Col_cuticle_N domain-containing protein
A2.transcripts:Locus_1_Transcript_74893_107551_Confidence_0.000_Length_1440	Anisakis	A0A0M3K845	94.1	187	1.54e-117	0.000154094821936319	8.99254	TrEMBL	A0A0M3K845_ANISI	NA	550	NA	NA	Anisakis simplex	Flavin-containing monooxygenase
A2.transcripts:Locus_15786_Transcript_13_14_Confidence_0.053_Length_577	Anisakis	CDJ90211.1	36.5	96	1.67e-10	1.74720328273952e-05	8.98789	Nr	CDJ90211	Protein C50F4.8 [Haemonchus contortus]	295	INV	NA	Haemonchus contortus	Protein C50F4.8
A2.transcripts:Locus_12447_Transcript_3_6_Confidence_0.300_Length_1228	Anisakis	A0A0M3IHL7	79.7	143	8.83e-67	4.53214296423214e-06	8.98403	TrEMBL	A0A0M3IHL7_ASCLU	NA	501	NA	NA	Ascaris lumbricoides	Fe-S_biosyn domain-containing protein
A2.transcripts:Locus_9843_Transcript_8_10_Confidence_0.529_Length_1383	Anisakis	KHN74330.1	71.6	148	1.60e-70	6.12182698582482e-05	8.98343	Nr	KHN74330	Myosin-2 essential light chain [Toxocara canis]	148	INV	Mlc-c	Toxocara canis	Myosin-2 essential light chain
A2.transcripts:Locus_8584_Transcript_31_35_Confidence_0.122_Length_944	Anisakis	A0A0M3K708	100	84	6.66e-08	0.00014045019357726	8.96527	TrEMBL	A0A0M3K708_ANISI	NA	310	NA	ASIM_LOCUS16156	Anisakis simplex	Col_cuticle_N domain-containing protein
A2.transcripts:Locus_12543_Transcript_1_3_Confidence_0.750_Length_1632	Anisakis	KHN72520.1	88.4	233	1.61e-145	7.46342109940759e-13	8.95181	Nr	KHN72520	Alanine aminotransferase 2 [Toxocara canis]	462	INV	gpt2	Toxocara canis	Alanine aminotransferase 2
A2.transcripts:Locus_1694_Transcript_10_17_Confidence_0.556_Length_1022	Anisakis	KHN77370.1	69.6	115	3.20e-56	4.65110018430663e-05	8.93136	Nr	KHN77370	Sortilin-related receptor [Toxocara canis]	139	INV	SORL1	Toxocara canis	Sortilin-related receptor
A2.transcripts:Locus_3567_Transcript_1_5_Confidence_0.727_Length_2954	Anisakis	KHN76817.1	54.9	597	3.60e-197	3.29162766286595e-07	8.91782	Nr	KHN76817	BRICHOS domain-containing protein C09F5.1 [Toxocara canis]	755	INV	C09F5.1	Toxocara canis	BRICHOS domain-containing protein C09F5.1
A2.transcripts:Locus_4_Transcript_403_510_Confidence_0.017_Length_2818	Anisakis	A0A0M3K913	100	129	2.55e-78	2.47691557014479e-06	8.89703	TrEMBL	A0A0M3K913_ANISI	NA	143	NA	ASIM_LOCUS16861	Anisakis simplex	Col_cuticle_N domain-containing protein
A1.A5.S3388886	Anisakis	XP_028399412.1	34.0	197	4.55e-10	0.00011015747222719	8.88413	Nr	XP_028399412	microcephalin-like [Dendronephthya gigantea]	305	INV	LOC114522847	Dendronephthya gigantea	microcephalin-like
A2.transcripts:Locus_3_Transcript_15153_70181_Confidence_0.000_Length_1333	Anisakis	KHN82980.1	88.7	142	4.03e-61	3.82333528830451e-05	8.87523	Nr	KHN82980	60S ribosomal protein L24 [Toxocara canis]	160	INV	rpl-24.1	Toxocara canis	60S ribosomal protein L24
A0.A0.NODE_21041_length_641_cov_14.667235_g12903_i0	Anisakis	A0A0M3JK46	75.6	90	1.55e-32	0.00431033838892451	8.86711	TrEMBL	A0A0M3JK46_ANISI	NA	206	NA	ASIM_LOCUS7779	Anisakis simplex	HTH CENPB-type domain-containing protein
A0.A2.NODE_2498_length_1201_cov_97.357509_g734_i1	Anisakis	KHN76656.1	65.8	243	6.48e-97	0.000180350382722198	8.86273	Nr	KHN76656	Carboxypeptidase B [Toxocara canis]	661	INV	NA	Toxocara canis	Carboxypeptidase B
A2.transcripts:Locus_1019_Transcript_61_66_Confidence_0.319_Length_2772	Anisakis	A0A158PMS6	99.3	421	2.95e-293	2.8585484298193e-06	8.85504	TrEMBL	A0A158PMS6_ANISI	NA	506	NA	ASIM_LOCUS9835	Anisakis simplex	Proline dehydrogenase
A2.transcripts:Locus_1773_Transcript_12_14_Confidence_0.471_Length_2757	Anisakis	A0A0M3JT91	60.7	483	4.82e-173	2.8407719402997e-06	8.84633	TrEMBL	A0A0M3JT91_ANISI	NA	328	NA	ASIM_LOCUS10793	Anisakis simplex	Palmitoyltransferase
A2.transcripts:Locus_17898_Transcript_9_9_Confidence_0.545_Length_901	Anisakis	XP_001901765.1	52.5	122	4.25e-16	0.000462252353551088	8.84232	Nr	XP_001901765	epicuticlin [Brugia malayi]	187	INV	NA	Brugia malayi	epicuticlin
A2.transcripts:Locus_3601_Transcript_3_6_Confidence_0.500_Length_2802	Anisakis	KHN72500.1	89.1	615	0.0	5.12072836253186e-05	8.83608	Nr	KHN72500	Cleavage and polyadenylation specificity factor subunit 3 [Toxocara canis]	660	INV	CPSF3	Toxocara canis	Cleavage and polyadenylation specificity factor subunit 3
A0.A5.NODE_29627_length_757_cov_4.701681_g13402_i0	Anisakis	A0A0M3IFM3	82.2	135	3.28e-78	0.0012961428265521	8.78779	TrEMBL	A0A0M3IFM3_ASCLU	NA	171	NA	NA	Ascaris lumbricoides	PAP2_C domain-containing protein
A0.A4.NODE_22595_length_707_cov_2.292793_g11451_i0	Anisakis	KHN72927.1	47.4	175	4.36e-34	7.18959011414036e-06	8.76659	Nr	KHN72927	Mitogen-activated protein kinase kinase kinase MLT [Toxocara canis]	458	INV	MLTK	Toxocara canis	Mitogen-activated protein kinase kinase kinase MLT
A2.transcripts:Locus_960_Transcript_33_47_Confidence_0.352_Length_1738	Anisakis	A0A0B2V5B1	83.1	354	1.75e-224	6.70774411535268e-05	8.75137	TrEMBL	A0A0B2V5B1_TOXCA	NA	620	NA	nas-30	Toxocara canis	Metalloendopeptidase
A0.A6.NODE_7403_length_1960_cov_50.099430_g1236_i2	Anisakis	KHN72862.1	70.0	503	5.07e-238	2.31576377974512e-05	8.75043	Nr	KHN72862	Rap guanine nucleotide exchange factor 1 [Toxocara canis]	484	INV	RAPGEF1	Toxocara canis	Rap guanine nucleotide exchange factor 1
A0.A2.NODE_5202_length_790_cov_1497.779238_g4432_i0	Anisakis	KHN73564.1	57.0	79	2.36e-15	0.000870634311033337	8.73288	Nr	KHN73564	Cuticle collagen sqt-1 [Toxocara canis]	282	INV	sqt-1	Toxocara canis	Cuticle collagen sqt-1
A2.transcripts:Locus_12513_Transcript_3_6_Confidence_0.308_Length_450	Anisakis	KHN86024.1	54.7	53	1.33e-07	0.0014885988672742	8.7323	Nr	KHN86024	Gamma-aminobutyric acid type B receptor subunit 2 [Toxocara canis]	874	INV	GABBR2	Toxocara canis	Gamma-aminobutyric acid type B receptor subunit 2
A1.A2.R681539	Anisakis	KHN88199.1	87.2	289	1.57e-56	1.2373220332292e-06	8.72064	Nr	KHN88199	Cuticle collagen 40 [Toxocara canis]	288	INV	col-40	Toxocara canis	Cuticle collagen 40
A0.A2.NODE_17402_length_310_cov_15.747331_g16214_i0	Anisakis	A0A0M3J019	58.8	102	4.86e-27	1.78755010756298e-06	8.70946	TrEMBL	A0A0M3J019_ANISI	NA	378	NA	ASIM_LOCUS752	Anisakis simplex	Protein kinase domain-containing protein
A2.transcripts:Locus_3_Transcript_55595_70181_Confidence_0.000_Length_1629	Anisakis	A0A0M3K555	100	237	4.46e-34	0.00113907095658837	8.70455	TrEMBL	A0A0M3K555_ANISI	NA	292	NA	ASIM_LOCUS15503	Anisakis simplex	Col_cuticle_N domain-containing protein
A2.transcripts:Locus_20773_Transcript_14_16_Confidence_0.354_Length_4346	Anisakis	A0A0M3I3C5	81.0	694	0.0	1.11312121142264e-05	8.69658	TrEMBL	A0A0M3I3C5_ASCLU	NA	928	NA	NA	Ascaris lumbricoides	Metalloendopeptidase
A2.transcripts:Locus_5441_Transcript_11_11_Confidence_0.100_Length_1390	Anisakis	A0A0M3JUW3	98.3	59	9.26e-29	3.31700854207486e-12	8.66135	TrEMBL	A0A0M3JUW3_ANISI	NA	278	NA	ASIM_LOCUS11457	Anisakis simplex	Col_cuticle_N domain-containing protein
A2.transcripts:Locus_19111_Transcript_17_23_Confidence_0.523_Length_2208	Anisakis	KHN79819.1	79.3	193	4.90e-80	8.80195316458461e-07	8.65589	Nr	KHN79819	Max dimerization protein 3 [Toxocara canis]	277	INV	mxd3	Toxocara canis	Max dimerization protein 3
A2.transcripts:Locus_1_Transcript_83793_107551_Confidence_0.000_Length_2376	Anisakis	KHN73072.1	69.4	481	7.36e-203	7.69328946267772e-06	8.61554	Nr	KHN73072	putative ATP-dependent RNA helicase DDX27 [Toxocara canis]	458	INV	DDX27	Toxocara canis	putative ATP-dependent RNA helicase DDX27
A2.transcripts:Locus_7339_Transcript_4_7_Confidence_0.273_Length_606	Anisakis	A0A0M3JSW7	57.7	201	2.26e-57	0.00134641818027102	8.59168	TrEMBL	A0A0M3JSW7_ANISI	NA	452	NA	ASIM_LOCUS10652	Anisakis simplex	Peptidase_M14 domain-containing protein
A0.A4.NODE_10487_length_1974_cov_14.825660_g5236_i0	Anisakis	A0A0M3JU43	50.0	486	1.13e-122	0.000238414599850952	8.5861	TrEMBL	A0A0M3JU43_ANISI	NA	361	NA	ASIM_LOCUS11146	Anisakis simplex	Beta_elim_lyase domain-containing protein
A2.transcripts:Locus_37614_Transcript_1_1_Confidence_0.000_Length_2191	Anisakis	KHN79588.1	55.1	818	3.69e-238	3.74552588435205e-07	8.55669	Nr	KHN79588	Hemicentin-1, partial [Toxocara canis]	1555	INV	HMCN1	Toxocara canis	Hemicentin-1
A0.A4.NODE_2375_length_3938_cov_1963.960226_g87_i12	Anisakis	A0A0M3HS13	25.4	465	8.46e-33	0.000835235661009955	8.54946	TrEMBL	A0A0M3HS13_ASCLU	NA	1381	NA	NA	Ascaris lumbricoides	CCHC-type domain-containing protein
A2.transcripts:Locus_466_Transcript_27_29_Confidence_0.326_Length_4872	Anisakis	BAJ17131.1	60.2	757	1.25e-266	0.000183125237912485	8.54507	Nr	BAJ17131	hypoxia inducible factor 1, alpha subunit [Ascaris suum]	832	INV	HIF1A	Ascaris suum	hypoxia inducible factor 1, alpha subunit
A1.A1.J3309886	Anisakis	A0A158PP09	94.3	192	8.31e-120	1.75418157068736e-05	8.52088	TrEMBL	A0A158PP09_ANISI	NA	386	NA	ASIM_LOCUS12829	Anisakis simplex	WD repeat-containing protein 89
A0.A5.NODE_30747_length_712_cov_4.533632_g14133_i0	Anisakis	KHN80839.1	87.9	58	4.82e-22	1.31352792746097e-05	8.50577	Nr	KHN80839	Putative cuticle collagen [Toxocara canis]	364	INV	col-155	Toxocara canis	putative cuticle collagen
A2.transcripts:Locus_3_Transcript_8983_70181_Confidence_0.000_Length_2584	Anisakis	A0A0B2VA51	72.5	109	7.38e-33	3.30114909473467e-05	8.50315	TrEMBL	A0A0B2VA51_TOXCA	NA	492	NA	Tcan_02879	Toxocara canis	G_PROTEIN_RECEP_F1_2 domain-containing protein
A2.transcripts:Locus_2559_Transcript_51_56_Confidence_0.278_Length_1058	Anisakis	A0A0M3HRW4	58.3	326	2.02e-133	7.55988328233967e-07	8.50069	TrEMBL	A0A0M3HRW4_ASCLU	NA	394	NA	NA	Ascaris lumbricoides	UDP-glucuronosyltransferase
A2.transcripts:Locus_411_Transcript_7_9_Confidence_0.417_Length_1143	Anisakis	KHN81969.1	57.9	242	3.25e-89	2.69921547675082e-14	8.49839	Nr	KHN81969	Glutathione S-transferase 1 [Toxocara canis]	240	INV	GST1	Toxocara canis	Glutathione S-transferase 1
A0.A1.NODE_1802_length_4596_cov_79.533893_g396_i2	Anisakis	A0A0M3I8Q5	59.8	530	5.57e-184	2.19220774675488e-05	8.48216	TrEMBL	A0A0M3I8Q5_ASCLU	NA	484	NA	NA	Ascaris lumbricoides	Aa_trans domain-containing protein
A0.A4.NODE_9936_length_2051_cov_134.271144_g2567_i1	Anisakis	KHN81970.1	61.0	562	8.05e-238	7.08348079798973e-06	8.48061	Nr	KHN81970	Major facilitator superfamily domain-containing protein 8 [Toxocara canis]	543	INV	mfsd8	Toxocara canis	Major facilitator superfamily domain-containing protein 8
A2.transcripts:Locus_411_Transcript_3_9_Confidence_0.250_Length_629	Anisakis	KHN81969.1	58.8	114	1.37e-34	2.69244739528675e-05	8.47457	Nr	KHN81969	Glutathione S-transferase 1 [Toxocara canis]	240	INV	GST1	Toxocara canis	Glutathione S-transferase 1
A2.transcripts:Locus_22124_Transcript_8_12_Confidence_0.650_Length_688	Anisakis	A0A0M3JVF9	98.0	49	4.10e-18	0.000945091162022514	8.46747	TrEMBL	A0A0M3JVF9_ANISI	NA	1344	NA	ASIM_LOCUS11678	Anisakis simplex	CTF/NF-I domain-containing protein
A2.transcripts:Locus_1397_Transcript_25_26_Confidence_0.127_Length_3088	Anisakis	AXS78295.1	99.1	464	0.0	0.000328548758866559	8.46702	Nr	AXS78295	degenerin, partial [Anisakis simplex]	886	INV	deg	Anisakis simplex	degenerin
A2.transcripts:Locus_3_Transcript_36110_70181_Confidence_0.000_Length_2392	Anisakis	KHN71222.1	83.8	154	1.60e-76	0.000266597430798731	8.44711	Nr	KHN71222	putative rho GDP-dissociation inhibitor [Toxocara canis]	202	INV	rhi-1	Toxocara canis	putative rho GDP-dissociation inhibitor
A2.transcripts:Locus_3_Transcript_12516_70181_Confidence_0.001_Length_4191	Anisakis	KHN86459.1	59.4	898	0.0	4.23928345002753e-06	8.43612	Nr	KHN86459	Tripartite motif-containing protein 2 [Toxocara canis]	866	INV	TRIM2	Toxocara canis	Tripartite motif-containing protein 2
A0.A2.NODE_14265_length_365_cov_19.008929_g13077_i0	Anisakis	A0A0M3K5I0	35.8	95	2.18e-11	0.000164009888217138	8.42686	TrEMBL	A0A0M3K5I0_ANISI	NA	107	NA	ASIM_LOCUS15628	Anisakis simplex	Glycine N-acyltransferase-like protein
A2.transcripts:Locus_3_Transcript_8554_70181_Confidence_0.000_Length_755	Anisakis	A0A0M3J302	94.3	35	6.12e-12	7.56901102319718e-05	8.4254	TrEMBL	A0A0M3J302_ANISI	NA	201	NA	ASIM_LOCUS1785	Anisakis simplex	Peptidase A1 domain-containing protein
A2.transcripts:Locus_3_Transcript_50369_70181_Confidence_0.000_Length_3659	Anisakis	A0A0M3JVI0	84.6	907	0.0	0.000860993858547843	8.42354	TrEMBL	A0A0M3JVI0_ANISI	NA	826	NA	ASIM_LOCUS11701	Anisakis simplex	E3 ubiquitin-protein ligase
A2.transcripts:Locus_1_Transcript_87289_107551_Confidence_0.000_Length_739	Anisakis	F1KY63	74.0	181	1.70e-91	3.05673714577441e-06	8.41501	TrEMBL	F1KY63_ASCSU	Mediator complex subunit 8	235	NA	MED8	Ascaris suum	Mediator of RNA polymerase II transcription subunit 8
A2.transcripts:Locus_1_Transcript_86370_107551_Confidence_0.000_Length_1984	Anisakis	KHN85171.1	70.9	446	1.04e-249	0.00100363407974772	8.40318	Nr	KHN85171	Beta-glucosidase 6 [Toxocara canis]	523	INV	BGLU6	Toxocara canis	Beta-glucosidase 6
A0.A4.NODE_8381_length_2298_cov_347.199380_g4272_i0	Anisakis	A0A0M3I4A7	82.2	73	5.72e-24	1.58238250110409e-05	8.4006	TrEMBL	A0A0M3I4A7_ASCLU	NA	348	NA	NA	Ascaris lumbricoides	Col_cuticle_N domain-containing protein
A2.transcripts:Locus_596_Transcript_6_50_Confidence_0.171_Length_1908	Anisakis	A0A0M3K845	94.7	419	6.06e-283	6.46370055666161e-05	8.39172	TrEMBL	A0A0M3K845_ANISI	NA	550	NA	NA	Anisakis simplex	Flavin-containing monooxygenase
A2.transcripts:Locus_24581_Transcript_3_6_Confidence_0.714_Length_2223	Anisakis	A0A0M3IZK7	99.8	436	5.33e-312	2.53541673819865e-06	8.38963	TrEMBL	A0A0M3IZK7_ANISI	NA	436	NA	ASIM_LOCUS590	Anisakis simplex	Protein CLP1 homolog
A0.A1.NODE_12068_length_1976_cov_22.326349_g5642_i0	Anisakis	KHN72258.1	51.3	616	1.43e-196	8.65729559351606e-10	8.38832	Nr	KHN72258	Vitrin [Toxocara canis]	613	INV	Vit	Toxocara canis	Vitrin
A0.A2.NODE_10418_length_472_cov_16.085779_g9257_i0	Anisakis	KHN72957.1	66.0	156	8.67e-57	1.19570354883144e-05	8.38076	Nr	KHN72957	Gamma-aminobutyric acid receptor subunit beta [Toxocara canis]	547	INV	gab-1	Toxocara canis	Gamma-aminobutyric acid receptor subunit beta
A0.A1.NODE_20200_length_1175_cov_43.347473_g9165_i0	Anisakis	CAC38979.1	57.7	97	1.21e-09	0.000301957936562136	8.35943	Nr	CAC38979	epicuticlin, partial [Ascaris suum]	318	INV	epicut1	Ascaris suum	epicuticlin
A2.transcripts:Locus_591_Transcript_64_99_Confidence_0.110_Length_1675	Anisakis	KHN83379.1	52.6	116	6.66e-29	2.7676844986835e-06	8.35469	Nr	KHN83379	GRAM domain-containing protein 4 [Toxocara canis]	572	INV	Gramd4	Toxocara canis	GRAM domain-containing protein 4
A0.A1.NODE_17243_length_1428_cov_48.880970_g2728_i1	Anisakis	A0A0B2VSH0	75.5	204	1.17e-107	1.86739542222748e-05	8.34065	TrEMBL	A0A0B2VSH0_TOXCA	NA	210	NA	Tcan_11426	Toxocara canis	GST class-pi
A0.A4.NODE_27545_length_442_cov_1.546135_g15894_i0	Anisakis	KHN85303.1	58.4	137	1.65e-45	1.03604786315511e-05	8.32475	Nr	KHN85303	Lysosomal acid phosphatase [Toxocara canis]	914	INV	acp2	Toxocara canis	Lysosomal acid phosphatase
A0.A1.NODE_20023_length_1191_cov_4.520463_g9083_i0	Anisakis	CDP91065.1	43.7	158	1.37e-13	5.88177641460992e-33	8.32032	Nr	CDP91065	Bm1793 [Brugia malayi]	479	INV	Bm1793	Brugia malayi	Bm1793
A2.transcripts:Locus_1882_Transcript_5_19_Confidence_0.370_Length_2704	Anisakis	A0A0M3JZR8	97.0	468	4.57e-293	1.79689922961604e-05	8.3042	TrEMBL	A0A0M3JZR8_ANISI	NA	473	NA	ASIM_LOCUS13446	Anisakis simplex	G_PROTEIN_RECEP_F1_2 domain-containing protein
A2.transcripts:Locus_2350_Transcript_34_35_Confidence_0.157_Length_2098	Anisakis	A0A0M3JXA1	100	317	4.25e-225	0.000171866073924693	8.29817	TrEMBL	A0A0M3JXA1_ANISI	NA	317	NA	ASIM_LOCUS12430	Anisakis simplex	Protein phosphatase
A0.A0.NODE_23030_length_544_cov_6.893661_g14763_i0	Anisakis	RCN50842.1	46.3	80	1.57e-13	1.31352792746097e-05	8.28741	Nr	RCN50842	serine carboxypeptidase S28 [Ancylostoma caninum]	554	INV	NA	Ancylostoma caninum	serine carboxypeptidase S28
A2.transcripts:Locus_2_Transcript_15_16_Confidence_0.500_Length_1892	Anisakis	A0A0M3KGG7	99.3	146	1.36e-61	0.000109573030314974	8.28061	TrEMBL	A0A0M3KGG7_ANISI	NA	227	NA	ASIM_LOCUS19466	Anisakis simplex	Col_cuticle_N domain-containing protein
A0.A2.NODE_2131_length_1306_cov_966.062647_g1780_i0	Anisakis	P17656.1	100	23	1.94e-07	0.0173892545544767	8.27808	Swiss-Prot	COL2_CAEEL	RecName: Full=Cuticle collagen 2; Flags: Precursor	301	INV	NA	Caenorhabditis elegans	Cuticle collagen 2
A2.transcripts:Locus_1527_Transcript_67_97_Confidence_0.092_Length_4732	Anisakis	A0A158PP91	92.6	891	0.0	0.000176518109061275	8.26106	TrEMBL	A0A158PP91_ANISI	NA	1666	NA	ASIM_LOCUS13362	Anisakis simplex	Protein kinase domain-containing protein
A2.transcripts:Locus_207_Transcript_23_29_Confidence_0.375_Length_2743	Anisakis	XP_020305173.1	43.2	835	2.89e-223	0.00421050954748218	8.24831	Nr	XP_020305173	processed neurogenic locus Notch protein [Loa loa]	802	INV	NA	Loa loa	processed neurogenic locus Notch protein
A2.transcripts:Locus_4_Transcript_255_510_Confidence_0.005_Length_738	Anisakis	A0A0M3I3I5	89.6	77	6.42e-39	5.3588683471164e-06	8.22657	TrEMBL	A0A0M3I3I5_ASCLU	NA	288	NA	NA	Ascaris lumbricoides	Col_cuticle_N domain-containing protein
A0.A1.NODE_4505_length_3331_cov_20.842525_g2328_i0	Anisakis	A0A0M3JYR0	50.0	246	2.52e-58	5.5711156160621e-06	8.22343	TrEMBL	A0A0M3JYR0_ANISI	NA	309	NA	NA	Anisakis simplex	Tetraspanin
A0.A5.NODE_4918_length_3029_cov_46.885131_g2393_i0	Anisakis	KHN76106.1	71.2	233	1.06e-104	0.0130837877733447	8.21642	Nr	KHN76106	SEC14-like protein 2 [Toxocara canis]	395	INV	SEC14L2	Toxocara canis	SEC14-like protein 2
A2.transcripts:Locus_1025_Transcript_15_16_Confidence_0.423_Length_2569	Anisakis	KHN81115.1	78.2	545	3.90e-288	2.15875782941073e-05	8.2092	Nr	KHN81115	La-related protein [Toxocara canis]	539	INV	NA	Toxocara canis	La-related protein
A2.transcripts:Locus_183_Transcript_40_77_Confidence_0.126_Length_2185	Anisakis	KHN75863.1	72.0	168	3.89e-70	0.0019456580402349	8.20526	Nr	KHN75863	Methylmalonyl-CoA epimerase, mitochondrial [Toxocara canis]	166	INV	Mcee	Toxocara canis	Methylmalonyl-CoA epimerase, mitochondrial
A0.A5.NODE_3812_length_3347_cov_759.713680_g1701_i1	Anisakis	A0A3P7FS30	97.0	234	1.63e-155	0.00230651158185063	8.19702	TrEMBL	A0A3P7FS30_TOXCA	NA	254	NA	TCNE_LOCUS4571	Toxocara canis	Tubulin alpha chain
A2.transcripts:Locus_11443_Transcript_2_4_Confidence_0.750_Length_792	Anisakis	A0A0M3JRM4	96.5	170	1.62e-106	0.0208021377333243	8.18303	TrEMBL	A0A0M3JRM4_ANISI	NA	429	NA	ASIM_LOCUS10124	Anisakis simplex	PALP domain-containing protein
A2.transcripts:Locus_4_Transcript_20791_21802_Confidence_0.000_Length_1837	Anisakis	EJW82328.1	40.7	194	4.75e-12	5.5711156160621e-06	8.17992	Nr	EJW82328	zinc finger protein [Wuchereria bancrofti]	831	INV	NA	Wuchereria bancrofti	zinc finger protein
A2.transcripts:Locus_4982_Transcript_8_48_Confidence_0.067_Length_625	Anisakis	A0A3P6RJN5	100	92	8.84e-55	0.00090021238959154	8.16977	TrEMBL	A0A3P6RJN5_ANISI	NA	215	NA	ASIM_LOCUS18143	Anisakis simplex	MFS domain-containing protein
A2.transcripts:Locus_1_Transcript_43342_107551_Confidence_0.000_Length_2309	Anisakis	A0A0M3K3R5	85.7	329	1.97e-180	7.38401479931984e-05	8.16108	TrEMBL	A0A0M3K3R5_ANISI	NA	464	NA	NA	Anisakis simplex	Phosphoglycerate kinase
A2.transcripts:Locus_1429_Transcript_30_47_Confidence_0.109_Length_758	Anisakis	CRZ24463.1	38.7	119	2.10e-11	0.00133999045503482	8.14534	Nr	CRZ24463	Bm9908 [Brugia malayi]	443	INV	Bm9908	Brugia malayi	Bm9908
A2.transcripts:Locus_1_Transcript_66286_107551_Confidence_0.000_Length_3217	Anisakis	KHN86441.1	92.6	122	6.08e-59	7.30417298153795e-06	8.13955	Nr	KHN86441	Double-strand break repair protein mre-11 [Toxocara canis]	1009	INV	mre-11	Toxocara canis	Double-strand break repair protein mre-11
A0.A0.NODE_10878_length_1571_cov_10.604881_g5932_i0	Anisakis	CAC38979.1	57.7	97	2.16e-09	0.0193220025227475	8.12586	Nr	CAC38979	epicuticlin, partial [Ascaris suum]	318	INV	epicut1	Ascaris suum	epicuticlin
A2.transcripts:Locus_36620_Transcript_1_1_Confidence_0.000_Length_833	Anisakis	KHN81865.1	80.2	192	1.59e-106	7.89034146499012e-05	8.11675	Nr	KHN81865	Globin-like protein 9, partial [Toxocara canis]	243	INV	glb-9	Toxocara canis	Globin-like protein 9
A0.A5.NODE_25667_length_940_cov_98.791527_g2184_i3	Anisakis	A0A0M3JYK6	87.3	63	3.49e-24	0.00233281668376647	8.1145	TrEMBL	A0A0M3JYK6_ANISI	NA	638	NA	ASIM_LOCUS12962	Anisakis simplex	Acyl_transf_3 domain-containing protein
A2.transcripts:Locus_21228_Transcript_4_24_Confidence_0.229_Length_666	Anisakis	CDJ84116.1	47.0	168	5.19e-45	0.000816512930816465	8.1086	Nr	CDJ84116	Protein C17F4.7 [Haemonchus contortus]	185	INV	NA	Haemonchus contortus	Protein C17F4.7
A2.transcripts:Locus_15968_Transcript_6_7_Confidence_0.462_Length_2227	Anisakis	A0A0M3KAD9	95.8	309	2.72e-176	0.00830206911868115	8.10122	TrEMBL	A0A0M3KAD9_ANISI	Protein SEC13 homolog	309	NA	ASIM_LOCUS17336	Anisakis simplex	GATOR complex protein SEC13
A2.transcripts:Locus_3_Transcript_50373_70181_Confidence_0.000_Length_3472	Anisakis	A0A0M3JVI0	90.3	639	0.0	0.000390810976404181	8.10119	TrEMBL	A0A0M3JVI0_ANISI	NA	826	NA	ASIM_LOCUS11701	Anisakis simplex	E3 ubiquitin-protein ligase
A0.A2.NODE_20071_length_277_cov_10.725806_g18883_i0	Anisakis	KHN72293.1	90.1	91	1.01e-50	0.00847258211646221	8.09264	Nr	KHN72293	Bardet-Biedl syndrome 5 -like protein [Toxocara canis]	351	INV	bbs5	Toxocara canis	Bardet-Biedl syndrome 5 -like protein
A2.transcripts:Locus_32778_Transcript_2_2_Confidence_0.000_Length_239	Anisakis	A0A7I4Z6M2	65.9	41	2.81e-08	7.90464844903156e-06	8.08789	TrEMBL	A0A7I4Z6M2_HAECO	NA	1463	NA	NA	Haemonchus contortus	Peptidase M12B domain-containing protein
A2.transcripts:Locus_175_Transcript_145_179_Confidence_0.077_Length_1877	Anisakis	AZA15222.1	100	91	9.46e-49	2.02370808558853e-06	8.08483	Nr	AZA15222	cuticle collagen 34 [Anisakis simplex]	292	INV	col-34	Anisakis simplex	cuticle collagen 34
A1.A1.S2696530	Anisakis	KHN81865.1	54.5	66	3.89e-07	2.98374719191697e-05	8.07665	Nr	KHN81865	Globin-like protein 9, partial [Toxocara canis]	243	INV	glb-9	Toxocara canis	Globin-like protein 9
A0.A1.NODE_16780_length_1470_cov_23.781896_g7647_i0	Anisakis	A0A0M3J0F9	99.0	103	3.98e-58	8.35976343671772e-05	8.0554	TrEMBL	A0A0M3J0F9_ANISI	NA	210	NA	ASIM_LOCUS892	Anisakis simplex	Col_cuticle_N domain-containing protein
A2.transcripts:Locus_33733_Transcript_2_9_Confidence_0.545_Length_539	Anisakis	KHN70874.1	61.4	127	2.46e-33	6.20043174660469e-07	8.05038	Nr	KHN70874	Transmembrane protein 41 -like protein [Toxocara canis]	1248	INV	tag-175	Toxocara canis	Transmembrane protein 41 -like protein
A2.transcripts:Locus_8875_Transcript_8_9_Confidence_0.250_Length_2102	Anisakis	A0A0M3KD52	97.3	182	3.55e-112	1.9491447406376e-06	8.04916	TrEMBL	A0A0M3KD52_ANISI	NA	399	NA	ASIM_LOCUS18300	Anisakis simplex	BPI2 domain-containing protein
A0.A2.NODE_15206_length_347_cov_8.893082_g14018_i0	Anisakis	KHN72543.1	76.6	107	7.88e-54	4.68329946786996e-05	8.04824	Nr	KHN72543	Patched-related protein 9 [Toxocara canis]	869	INV	ptr-9	Toxocara canis	Patched-related protein 9
A0.A1.NODE_15751_length_1573_cov_44.809429_g148_i3	Anisakis	A0A0M3K4N2	42.7	150	5.28e-27	8.83055902719974e-06	8.04784	TrEMBL	A0A0M3K4N2_ANISI	NA	1553	NA	ASIM_LOCUS15330	Anisakis simplex	P-type domain-containing protein
A0.A2.NODE_1931_length_1361_cov_29797.108108_g1607_i0	Anisakis	P17656.1	100	23	2.78e-07	0.00345197873090125	8.04239	Swiss-Prot	COL2_CAEEL	RecName: Full=Cuticle collagen 2; Flags: Precursor	301	INV	NA	Caenorhabditis elegans	Cuticle collagen 2
A1.A1.R3365968	Anisakis	KHN81054.1	90.3	62	1.56e-28	0.000194627446360723	8.03957	Nr	KHN81054	Growth factor receptor-bound protein 10 [Toxocara canis]	271	INV	Grb10	Toxocara canis	Growth factor receptor-bound protein 10
A0.A5.NODE_23128_length_1084_cov_4.443804_g9859_i0	Anisakis	A0A0M3K6C8	88.8	250	3.75e-141	6.18007822723342e-05	8.0358	TrEMBL	A0A0M3K6C8_ANISI	NA	478	NA	ASIM_LOCUS15926	Anisakis simplex	BED-type domain-containing protein
A0.A1.NODE_25866_length_766_cov_7.851216_g12637_i0	Anisakis	KHN83246.1	59.3	167	2.50e-66	3.84216977258773e-07	8.01838	Nr	KHN83246	IgGFc-binding protein [Toxocara canis]	929	INV	FCGBP	Toxocara canis	IgGFc-binding protein
A0.A2.NODE_9126_length_525_cov_723.122984_g8018_i0	Anisakis	A0A498S307	75.0	72	1.72e-34	0.000120047250156335	7.99878	TrEMBL	A0A498S307_ACAVI	NA	298	NA	NAV_LOCUS1011	Acanthocheilonema viteae	Col_cuticle_N domain-containing protein
A2.transcripts:Locus_438_Transcript_12_37_Confidence_0.487_Length_2281	Anisakis	A0A0M3K5I0	46.4	56	4.91e-06	0.000623296687639094	7.99277	TrEMBL	A0A0M3K5I0_ANISI	NA	107	NA	ASIM_LOCUS15628	Anisakis simplex	Glycine N-acyltransferase-like protein
A0.A4.NODE_10180_length_2016_cov_159.510886_g5099_i0	Anisakis	G5EC68.1	65.1	43	1.33e-07	0.000386995202832634	7.98626	Swiss-Prot	ABF2_CAEEL	RecName: Full=Antibacterial factor-related peptide 2; Flags: Precursor	85	INV	NA	Caenorhabditis elegans	Antibacterial factor-related peptide 2
A2.transcripts:Locus_14_Transcript_1_1_Confidence_0.000_Length_495	Anisakis	A0A0M3J3G0	96.2	53	9.33e-27	1.46901518288416e-06	7.98285	TrEMBL	A0A0M3J3G0_ANISI	NA	339	NA	ASIM_LOCUS1943	Anisakis simplex	Col_cuticle_N domain-containing protein
A0.A1.NODE_24100_length_881_cov_2.325553_g11383_i0	Anisakis	CTP82123.1	25.1	351	2.15e-10	0.00029122277693553	7.95554	Nr	CTP82123	Bm12950 [Brugia malayi]	1286	INV	Bm12950	Brugia malayi	Bm12950
A0.A4.NODE_867_length_5107_cov_52.474734_g500_i0	Anisakis	A0A0M3JTA8	57.1	890	4.52e-267	5.97678256814556e-05	7.93288	TrEMBL	A0A0M3JTA8_ANISI	NA	1234	NA	ASIM_LOCUS10813	Anisakis simplex	DNA mismatch repair protein
A2.transcripts:Locus_2219_Transcript_2_13_Confidence_0.529_Length_1130	Anisakis	A0A0B2VD43	61.0	146	8.98e-48	3.50079078736253e-05	7.92134	TrEMBL	A0A0B2VD43_TOXCA	NA	245	NA	unc119b-a	Toxocara canis	GMP_PDE_delta domain-containing protein
A2.transcripts:Locus_8857_Transcript_9_16_Confidence_0.429_Length_1084	Anisakis	KHN72938.1	66.7	147	8.16e-59	0.000110756906571494	7.9168	Nr	KHN72938	Calmodulin-like protein 5 [Toxocara canis]	247	INV	CALML5	Toxocara canis	Calmodulin-like protein 5
A2.transcripts:Locus_11254_Transcript_10_24_Confidence_0.500_Length_1784	Anisakis	CDP91065.1	50.9	328	3.59e-76	6.07548810656098e-05	7.90912	Nr	CDP91065	Bm1793 [Brugia malayi]	479	INV	Bm1793	Brugia malayi	Bm1793
A2.transcripts:Locus_578_Transcript_117_121_Confidence_0.067_Length_2618	Anisakis	KHN87002.1	40.4	495	1.33e-95	4.35757049333341e-05	7.90594	Nr	KHN87002	Glycine receptor subunit alpha-3 [Toxocara canis]	398	INV	Glra3	Toxocara canis	Glycine receptor subunit alpha-3
A0.A2.NODE_945_length_1790_cov_30.054514_g772_i0	Anisakis	A0A158PPG8	99.7	596	0.0	1.37305448196554e-18	7.89633	TrEMBL	A0A158PPG8_ANISI	NA	876	NA	ASIM_LOCUS13997	Anisakis simplex	SSD domain-containing protein
A2.transcripts:Locus_1560_Transcript_23_29_Confidence_0.186_Length_3933	Anisakis	A0A183UZ68	91.9	619	0.0	0.000200265228805555	7.89487	TrEMBL	A0A183UZ68_TOXCA	NA	772	NA	TCNE_LOCUS13788	Toxocara canis	Phosphoinositide phospholipase C
A2.transcripts:Locus_4_Transcript_295_510_Confidence_0.007_Length_2125	Anisakis	KHN80325.1	42.8	313	2.34e-31	1.19508219029147e-05	7.88331	Nr	KHN80325	Cuticle collagen 13 [Toxocara canis]	353	INV	col-13	Toxocara canis	Cuticle collagen 13
A2.transcripts:Locus_1_Transcript_42783_107551_Confidence_0.000_Length_627	Anisakis	A0A0M3I2K1	32.6	141	2.09e-16	0.00439269577486149	7.87953	TrEMBL	A0A0M3I2K1_ASCLU	NA	290	NA	NA	Ascaris lumbricoides	Glycine N-acyltransferase-like protein
A2.transcripts:Locus_25988_Transcript_1_1_Confidence_0.000_Length_400	Anisakis	A0A2K6VXS5	71.2	132	1.89e-67	6.70426448365581e-07	7.8729	TrEMBL	A0A2K6VXS5_ONCVO	NA	1109	NA	NA	Onchocerca volvulus	Peptidase M12B domain-containing protein
A2.transcripts:Locus_2933_Transcript_6_19_Confidence_0.571_Length_3475	Anisakis	A0A0M3KE68	87.5	514	2.76e-309	0.000403495476308047	7.85918	TrEMBL	A0A0M3KE68_ANISI	NA	547	NA	ASIM_LOCUS18666	Anisakis simplex	RING-type domain-containing protein
A0.A5.NODE_24043_length_1032_cov_43.888777_g10274_i0	Anisakis	F1LHG9	70.1	147	6.09e-59	7.60800530087804e-05	7.85796	TrEMBL	F1LHG9_ASCSU	NA	146	NA	NA	Ascaris suum	Ribonuclease P
A2.transcripts:Locus_2468_Transcript_27_27_Confidence_0.108_Length_1084	Anisakis	KHN87501.1	56.2	283	4.02e-111	0.00106074204675879	7.85545	Nr	KHN87501	Epidermal retinol dehydrogenase 2 [Toxocara canis]	294	INV	SDR16C5	Toxocara canis	Epidermal retinol dehydrogenase 2
A2.transcripts:Locus_93_Transcript_25_25_Confidence_0.000_Length_401	Anisakis	A0A0M3K515	100	37	2.27e-13	0.000540552588841455	7.85193	TrEMBL	A0A0M3K515_ANISI	NA	935	NA	ASIM_LOCUS15463	Anisakis simplex	BPI2 domain-containing protein
A0.A5.NODE_22616_length_1116_cov_8.054986_g9618_i0	Anisakis	KHN74504.1	50.0	132	4.61e-27	0.000129475614485195	7.84839	Nr	KHN74504	Platelet endothelial aggregation receptor 1 [Toxocara canis]	410	INV	PEAR1	Toxocara canis	Platelet endothelial aggregation receptor 1
A0.A2.NODE_6076_length_709_cov_46.335294_g5217_i0	Anisakis	A0A016RZ72	45.2	104	1.54e-15	0.000103353482371891	7.83835	TrEMBL	A0A016RZ72_9BILA	NA	469	NA	Acey_s0338.g2934	Ancylostoma ceylanicum	Reverse transcriptase domain-containing protein
A0.A5.NODE_37004_length_512_cov_5.614072_g19176_i0	Anisakis	KHN81573.1	42.1	107	1.10e-15	0.00287560263203316	7.83017	Nr	KHN81573	Hemicentin-1, partial [Toxocara canis]	229	INV	HMCN1	Toxocara canis	Hemicentin-1
A2.transcripts:Locus_2921_Transcript_1_2_Confidence_0.500_Length_1058	Anisakis	KHN72938.1	55.4	193	4.42e-59	0.0106500955596432	7.82921	Nr	KHN72938	Calmodulin-like protein 5 [Toxocara canis]	247	INV	CALML5	Toxocara canis	Calmodulin-like protein 5
A0.A4.NODE_14035_length_1518_cov_27.384563_g6715_i1	Anisakis	CTP81498.1	31.6	158	5.42e-08	0.000172271907874473	7.82404	Nr	CTP81498	Bm10627 [Brugia malayi]	370	INV	Bm10627	Brugia malayi	Bm10627
A2.transcripts:Locus_18250_Transcript_3_10_Confidence_0.067_Length_374	Anisakis	A0A0M3JVA8	97.9	96	3.18e-54	8.40818240632834e-05	7.81841	TrEMBL	A0A0M3JVA8_ANISI	NA	1113	NA	ASIM_LOCUS11622	Anisakis simplex	BHLH domain-containing protein
A0.A4.NODE_3277_length_3544_cov_237.327719_g40_i1	Anisakis	KHN76272.1	54.5	286	4.86e-98	0.00030037582957466	7.81115	Nr	KHN76272	Ribosomal L1 domain-containing protein [Toxocara canis]	500	INV	NA	Toxocara canis	Ribosomal L1 domain-containing protein
A2.transcripts:Locus_33990_Transcript_1_2_Confidence_0.375_Length_960	Anisakis	A0A0M3K2U5	100	112	1.12e-63	6.04600034833923e-05	7.79656	TrEMBL	A0A0M3K2U5_ANISI	NA	737	NA	ASIM_LOCUS14675	Anisakis simplex	Glycerol-3-phosphate dehydrogenase
A2.transcripts:Locus_10797_Transcript_38_40_Confidence_0.296_Length_1396	Anisakis	KHN84575.1	70.8	360	6.17e-194	0.00380960544610193	7.76484	Nr	KHN84575	Putative tyrosinase-like protein tyr-1 [Toxocara canis]	556	INV	tyr-1	Toxocara canis	putative tyrosinase-like protein tyr-1
A2.transcripts:Locus_207_Transcript_14_29_Confidence_0.458_Length_2811	Anisakis	XP_020305173.1	51.5	394	8.21e-132	0.00507564302923749	7.75837	Nr	XP_020305173	processed neurogenic locus Notch protein [Loa loa]	802	INV	NA	Loa loa	processed neurogenic locus Notch protein
A2.transcripts:Locus_960_Transcript_68_113_Confidence_0.061_Length_4515	Anisakis	KHN71604.1	63.1	1076	0.0	0.00154373367461858	7.75314	Nr	KHN71604	Helicase ARIP4 [Toxocara canis]	1157	INV	Rad54l2	Toxocara canis	Helicase ARIP4
A2.transcripts:Locus_2274_Transcript_8_13_Confidence_0.483_Length_1828	Anisakis	A0A3P6QYM4	98.8	251	4.20e-171	0.0141576518596477	7.74675	TrEMBL	A0A3P6QYM4_ANISI	NA	598	NA	ASIM_LOCUS15644	Anisakis simplex	DNA_mis_repair domain-containing protein
A2.transcripts:Locus_3_Transcript_62578_70181_Confidence_0.000_Length_3687	Anisakis	A0A0M3JR07	97.8	592	0.0	0.000106648052848974	7.72553	TrEMBL	A0A0M3JR07_ANISI	NA	932	NA	ASIM_LOCUS9865	Anisakis simplex	Mitogen-activated protein kinase kinase kinase
A1.A1.R3298612	Anisakis	KHN72257.1	97.4	151	2.64e-94	0.00956279691258694	7.70915	Nr	KHN72257	40S ribosomal protein S14 [Toxocara canis]	151	INV	rps-14	Toxocara canis	40S ribosomal protein S14
A2.transcripts:Locus_670_Transcript_86_89_Confidence_0.379_Length_3469	Anisakis	A0A4U8UH60	30.9	508	1.74e-47	0.00155921553264607	7.7086	TrEMBL	A0A4U8UH60_STECR	NA	1387	NA	L596_000146	Steinernema carpocapsae	G_PROTEIN_RECEP_F2_4 domain-containing protein
A0.A1.NODE_11804_length_2008_cov_26.160742_g5524_i0	Anisakis	A0A0M3JZN4	76.7	443	1.35e-225	0.000775005872682816	7.70004	TrEMBL	A0A0M3JZN4_ANISI	NA	466	NA	NA	Anisakis simplex	Glucuronosyltransferase
A2.transcripts:Locus_27_Transcript_24_33_Confidence_0.146_Length_1481	Anisakis	A0A0M3J019	48.9	186	3.88e-50	0.000695396152872268	7.69605	TrEMBL	A0A0M3J019_ANISI	NA	378	NA	ASIM_LOCUS752	Anisakis simplex	Protein kinase domain-containing protein
A2.transcripts:Locus_3533_Transcript_20_29_Confidence_0.215_Length_1950	Anisakis	KHN84404.1	69.2	412	1.18e-206	0.000498763792537526	7.68971	Nr	KHN84404	Protein disulfide-isomerase A5 [Toxocara canis]	614	INV	PDIA5	Toxocara canis	Protein disulfide-isomerase A5
A2.transcripts:Locus_1_Transcript_92734_107551_Confidence_0.000_Length_1648	Anisakis	A0A0B2VNQ8	39.8	171	4.40e-23	0.00426212164699358	7.6886	TrEMBL	A0A0B2VNQ8_TOXCA	NA	558	NA	Tcan_04261	Toxocara canis	VWFA domain-containing protein
A0.A2.NODE_573_length_2099_cov_284.630435_g454_i0	Anisakis	CDP91065.1	50.9	328	4.05e-75	9.61498505592384e-21	7.68716	Nr	CDP91065	Bm1793 [Brugia malayi]	479	INV	Bm1793	Brugia malayi	Bm1793
A2.transcripts:Locus_960_Transcript_11_47_Confidence_0.130_Length_664	Anisakis	A0A0B2V5B1	48.7	76	2.31e-13	0.00712718441681564	7.6707	TrEMBL	A0A0B2V5B1_TOXCA	NA	620	NA	nas-30	Toxocara canis	Metalloendopeptidase
A2.transcripts:Locus_1547_Transcript_1_7_Confidence_0.286_Length_581	Anisakis	KHN74084.1	58.3	163	8.10e-68	0.00315852073722759	7.66479	Nr	KHN74084	Zonadhesin [Toxocara canis]	826	INV	ZAN	Toxocara canis	Zonadhesin
A2.transcripts:Locus_857_Transcript_21_22_Confidence_0.167_Length_798	Anisakis	A0A183V370	75.8	124	4.57e-52	0.000212930183612727	7.66341	TrEMBL	A0A183V370_TOXCA	NA	522	NA	TCNE_LOCUS15190	Toxocara canis	Diacylglycerol kinase
A1.A0.S1710813	Anisakis	KHN72957.1	96.1	77	1.07e-39	0.000333120205380113	7.66014	Nr	KHN72957	Gamma-aminobutyric acid receptor subunit beta [Toxocara canis]	547	INV	gab-1	Toxocara canis	Gamma-aminobutyric acid receptor subunit beta
A0.A5.NODE_17461_length_1462_cov_4.589147_g7453_i0	Anisakis	AVV64052.1	95.1	285	4.72e-190	0.000237543559381945	7.61832	Nr	AVV64052	intraflagellar transport protein 52 [Anisakis simplex]	488	INV	Ift52	Anisakis simplex	intraflagellar transport protein 52
A2.transcripts:Locus_3_Transcript_23622_70181_Confidence_0.000_Length_2074	Anisakis	A1IKL2.1	92.9	98	1.00e-47	0.000431547673543596	7.61399	Swiss-Prot	ANIS5_ANISI	RecName: Full=SXP/RAL-2 family protein Ani s 5; AltName: Allergen=Ani s 5; Flags: Precursor	152	INV	NA	Anisakis simplex	SXP/RAL-2 family protein Ani s 5
A2.transcripts:Locus_1_Transcript_65096_107551_Confidence_0.000_Length_7992	Anisakis	AZA15242.1	99.5	561	0.0	0.000569677160224421	7.60237	Nr	AZA15242	probable phospholipid-transporting ATPase IM [Anisakis pegreffii]	685	INV	ATP8B4	Anisakis pegreffii	probable phospholipid-transporting ATPase IM
A0.A2.NODE_772_length_1908_cov_132.298031_g626_i0	Anisakis	VIO99973.1	58.0	88	7.29e-19	7.07051757014645e-11	7.60168	Nr	VIO99973	Prion-like-, putative [Brugia malayi]	112	INV	Bma-abu-12.2	Brugia malayi	Prion-like-, putative
A2.transcripts:Locus_12400_Transcript_14_38_Confidence_0.094_Length_502	Anisakis	F1KQB4	93.7	63	4.33e-27	0.000111752981489752	7.60157	TrEMBL	F1KQB4_ASCSU	NA	1891	NA	NA	Ascaris suum	Voltage-dependent L-type calcium channel subunit alpha
A2.transcripts:Locus_3237_Transcript_11_23_Confidence_0.469_Length_1843	Anisakis	A0A0M3IYS1	93.9	578	0.0	0.00135029160171156	7.59948	TrEMBL	A0A0M3IYS1_ANISI	NA	543	NA	ASIM_LOCUS304	Anisakis simplex	Metalloendopeptidase
A2.transcripts:Locus_3947_Transcript_19_64_Confidence_0.215_Length_1496	Anisakis	F1KPY0	48.1	345	6.57e-89	0.000203823353952436	7.59214	TrEMBL	F1KPY0_ASCSU	NA	2012	NA	NA	Ascaris suum	Carboxypeptidase
A2.transcripts:Locus_1283_Transcript_12_17_Confidence_0.238_Length_1068	Anisakis	A0A158PNH3	98.8	82	2.01e-48	0.00155921553264607	7.58863	TrEMBL	A0A158PNH3_ANISI	NA	260	NA	ASIM_LOCUS11479	Anisakis simplex	AAA_12 domain-containing protein
A2.transcripts:Locus_4_Transcript_2083_21802_Confidence_0.002_Length_7910	Anisakis	A0A0M3K1Z5	96.0	1847	0.0	0.000330242749811287	7.57518	TrEMBL	A0A0M3K1Z5_ANISI	NA	1839	NA	NA	Anisakis simplex	Myosin motor domain-containing protein
A2.transcripts:Locus_43198_Transcript_1_1_Confidence_0.000_Length_1446	Anisakis	KHN81969.1	57.9	240	1.11e-87	1.61827706576677e-07	7.57293	Nr	KHN81969	Glutathione S-transferase 1 [Toxocara canis]	240	INV	GST1	Toxocara canis	Glutathione S-transferase 1
A2.transcripts:Locus_3_Transcript_21602_70181_Confidence_0.000_Length_2797	Anisakis	KHN75747.1	38.7	501	3.25e-78	0.000129714302784779	7.57008	Nr	KHN75747	Putative zinc finger protein F56D1.1 [Toxocara canis]	364	INV	F56D1.1	Toxocara canis	putative zinc finger protein F56D1.1
A2.transcripts:Locus_207_Transcript_7_29_Confidence_0.167_Length_1409	Anisakis	XP_001898519.1	56.4	319	1.27e-114	0.000187739210368168	7.56894	Nr	XP_001898519	EGF-like domain containing protein [Brugia malayi]	543	INV	NA	Brugia malayi	EGF-like domain containing protein
A0.A6.NODE_8065_length_1850_cov_54.673256_g1601_i2	Anisakis	KHN85423.1	61.9	412	3.93e-133	0.00166379083225054	7.56766	Nr	KHN85423	Hamartin [Toxocara canis]	1238	INV	TSC1	Toxocara canis	Hamartin
A2.transcripts:Locus_1_Transcript_65335_107551_Confidence_0.000_Length_5371	Anisakis	KHN82102.1	55.2	210	1.47e-58	0.000130190273582652	7.55023	Nr	KHN82102	Paternally-expressed protein [Toxocara canis]	3286	INV	PEG3	Toxocara canis	Paternally-expressed protein
A2.transcripts:Locus_1947_Transcript_6_21_Confidence_0.227_Length_2639	Anisakis	KHN75509.1	44.5	528	9.57e-84	0.000595704579568894	7.53534	Nr	KHN75509	Beta-ureidopropionase [Toxocara canis]	1895	INV	UPB1	Toxocara canis	Beta-ureidopropionase
A0.A2.NODE_1433_length_1540_cov_35.260754_g1190_i0	Anisakis	A0A0M3K422	98.6	367	2.52e-261	2.11047303833176e-26	7.52617	TrEMBL	A0A0M3K422_ANISI	NA	368	NA	ASIM_LOCUS15120	Anisakis simplex	DB domain-containing protein
A1.A5.J3299900	Anisakis	A0A3P7PUL5	45.0	202	1.19e-44	0.000264252358686071	7.51631	TrEMBL	A0A3P7PUL5_9BILA	NA	423	NA	GPUH_LOCUS13643	Gongylonema pulchrum	AMP_N domain-containing protein
A2.transcripts:Locus_1_Transcript_100076_107551_Confidence_0.000_Length_420	Anisakis	A0A2A2M2G5	50.6	79	1.16e-14	0.031015735465285	7.50967	TrEMBL	A0A2A2M2G5_9BILA	NA	542	NA	WR25_20079	Diploscapter pachys	HTH CENPB-type domain-containing protein
A2.transcripts:Locus_20598_Transcript_36_41_Confidence_0.123_Length_1830	Anisakis	A0A158PN96	98.4	253	1.57e-175	0.00042206947204056	7.50548	TrEMBL	A0A158PN96_ANISI	Lipoate synthase	362	NA	ASIM_LOCUS10904	Anisakis simplex	Lipoyl synthase, mitochondrial
A0.A1.NODE_24797_length_833_cov_3.356397_g11857_i0	Anisakis	A0A0M3KES4	89.8	187	2.67e-126	0.0411963029786414	7.50543	TrEMBL	A0A0M3KES4_ANISI	NA	193	NA	ASIM_LOCUS18873	Anisakis simplex	C-type lectin domain-containing protein
A2.transcripts:Locus_4_Transcript_445_510_Confidence_0.011_Length_1817	Anisakis	A0A0M3JQB5	97.3	73	2.34e-36	0.000696241243461145	7.48331	TrEMBL	A0A0M3JQB5_ANISI	NA	73	NA	ASIM_LOCUS9595	Anisakis simplex	Col_cuticle_N domain-containing protein
A2.transcripts:Locus_19937_Transcript_1_3_Confidence_0.333_Length_711	Anisakis	A0A0M3JZY8	96.9	127	3.45e-86	0.00924056809300854	7.47747	TrEMBL	A0A0M3JZY8_ANISI	NA	173	NA	ASIM_LOCUS13533	Anisakis simplex	Reelin domain-containing protein
A2.transcripts:Locus_76_Transcript_198_307_Confidence_0.054_Length_1084	Anisakis	CDP98244.1	58.5	53	4.76e-08	0.00773579167320283	7.47158	Nr	CDP98244	BMA-TOS-1 [Brugia malayi]	231	INV	Bma-tos-1	Brugia malayi	BMA-TOS-1
A2.transcripts:Locus_4_Transcript_6874_21802_Confidence_0.001_Length_2253	Anisakis	XP_020306807.1	85.7	147	5.46e-78	0.00435689132601985	7.46439	Nr	XP_020306807	Ras-like protein [Loa loa]	207	INV	NA	Loa loa	Ras-like protein
A2.transcripts:Locus_4_Transcript_8768_21802_Confidence_0.000_Length_1869	Anisakis	A0A3P7E469	81.0	153	2.80e-55	0.0496349647171066	7.46186	TrEMBL	A0A3P7E469_WUCBA	NA	193	NA	WBA_LOCUS4105	Wuchereria bancrofti	Col_cuticle_N domain-containing protein
A0.A5.NODE_21268_length_1202_cov_4.559965_g7792_i1	Anisakis	A0A016SPS7	43.0	263	3.81e-58	1.44412311840486e-05	7.45243	TrEMBL	A0A016SPS7_9BILA	NA	395	NA	Acey_s0195.g1504	Ancylostoma ceylanicum	Peptidase A1 domain-containing protein
A0.A0.NODE_14802_length_1124_cov_58.500468_g8268_i0	Anisakis	F1LCB5	98.1	208	2.91e-137	0.000655135514316001	7.45035	TrEMBL	F1LCB5_ASCSU	NA	208	NA	NA	Ascaris suum	Synaptosomal-associated protein
A2.transcripts:Locus_269_Transcript_16_58_Confidence_0.090_Length_2262	Anisakis	CDJ97188.1	49.0	451	1.97e-153	0.0184782203452071	7.43552	Nr	CDJ97188	Peptidase S28 domain containing protein [Haemonchus contortus]	503	INV	NA	Haemonchus contortus	Peptidase S28 domain containing protein
A0.A2.NODE_14341_length_364_cov_6.561194_g13153_i0	Anisakis	A0A158PPJ7	98.2	57	9.07e-31	0.00209448529292762	7.43095	TrEMBL	A0A158PPJ7_ANISI	NA	309	NA	ASIM_LOCUS14277	Anisakis simplex	Metalloendopeptidase
A2.transcripts:Locus_3_Transcript_10034_70181_Confidence_0.000_Length_1005	Anisakis	A0A0M3I2Q8	77.8	117	3.31e-59	0.00230651158185063	7.42992	TrEMBL	A0A0M3I2Q8_ASCLU	NA	156	NA	NA	Ascaris lumbricoides	GLOBIN domain-containing protein
A0.A4.NODE_9413_length_2133_cov_17.645315_g4732_i0	Anisakis	KHN87659.1	84.7	98	5.06e-36	0.000381462106044269	7.4298	Nr	KHN87659	Acid-sensing ion channel 4 [Toxocara canis]	662	INV	asic4	Toxocara canis	Acid-sensing ion channel 4
A2.transcripts:Locus_8560_Transcript_6_6_Confidence_0.118_Length_913	Anisakis	A0A0M3KC03	93.2	117	1.25e-58	8.65489120471135e-06	7.42628	TrEMBL	A0A0M3KC03_ANISI	NA	285	NA	ASIM_LOCUS17901	Anisakis simplex	Ground-like domain-containing protein
A2.transcripts:Locus_13631_Transcript_1_6_Confidence_0.667_Length_1042	Anisakis	A0A0M3JSM8	86.8	234	1.04e-137	2.1103717556407e-05	7.42354	TrEMBL	A0A0M3JSM8_ANISI	NA	217	NA	ASIM_LOCUS10547	Anisakis simplex	DB domain-containing protein
A0.A5.NODE_9374_length_2254_cov_62.548168_g4321_i0	Anisakis	KHN73266.1	61.0	249	3.77e-88	0.00237631566952289	7.41394	Nr	KHN73266	Lambda-crystallin -like protein [Toxocara canis]	307	INV	CRYL1	Toxocara canis	Lambda-crystallin -like protein
A2.transcripts:Locus_3072_Transcript_25_53_Confidence_0.179_Length_4043	Anisakis	A0A0M3JT08	54.5	925	4.94e-287	0.000158124934029414	7.4095	TrEMBL	A0A0M3JT08_ANISI	NA	586	NA	ASIM_LOCUS10697	Anisakis simplex	Transporter
A2.transcripts:Locus_6920_Transcript_13_22_Confidence_0.400_Length_1847	Anisakis	KHN72520.1	89.8	431	2.08e-291	0.000922955921466232	7.40945	Nr	KHN72520	Alanine aminotransferase 2 [Toxocara canis]	462	INV	gpt2	Toxocara canis	Alanine aminotransferase 2
A2.transcripts:Locus_122_Transcript_93_104_Confidence_0.087_Length_667	Anisakis	KHN74592.1	65.4	107	3.15e-35	0.0218228472696688	7.38139	Nr	KHN74592	Putative serine protease K12H4.7, partial [Toxocara canis]	1661	INV	K12H4.7	Toxocara canis	putative serine protease K12H4.7
A2.transcripts:Locus_2168_Transcript_6_14_Confidence_0.583_Length_2391	Anisakis	CRZ26032.1	67.0	264	4.94e-116	0.0020046625144602	7.37917	Nr	CRZ26032	BMA-CHAT-1 [Brugia malayi]	364	INV	Bma-chat-1	Brugia malayi	BMA-CHAT-1
A2.transcripts:Locus_10919_Transcript_8_16_Confidence_0.480_Length_1312	Anisakis	A0A0M3KC03	95.7	186	9.29e-112	0.00482656878133771	7.37632	TrEMBL	A0A0M3KC03_ANISI	NA	285	NA	ASIM_LOCUS17901	Anisakis simplex	Ground-like domain-containing protein
A0.A5.NODE_42643_length_393_cov_5.385714_g24519_i0	Anisakis	A0A0B2UVD9	77.9	86	3.24e-37	0.00102543591383582	7.37627	TrEMBL	A0A0B2UVD9_TOXCA	NA	672	NA	Tcan_15507	Toxocara canis	Asparaginase
A0.A5.NODE_19653_length_1307_cov_107.103639_g8335_i0	Anisakis	A0A0M3I2K1	28.8	160	1.53e-08	6.35144476875682e-07	7.37517	TrEMBL	A0A0M3I2K1_ASCLU	NA	290	NA	NA	Ascaris lumbricoides	Glycine N-acyltransferase-like protein
A2.transcripts:Locus_41183_Transcript_1_1_Confidence_0.500_Length_307	Anisakis	A0A0M3JW58	72.5	102	6.50e-40	0.0341127660997786	7.36312	TrEMBL	A0A0M3JW58_ANISI	NA	212	NA	ASIM_LOCUS11967	Anisakis simplex	VWFA domain-containing protein
A2.transcripts:Locus_1827_Transcript_3_15_Confidence_0.462_Length_1948	Anisakis	A0A0M3IYS1	100	481	0.0	0.01856901962847	7.34491	TrEMBL	A0A0M3IYS1_ANISI	NA	543	NA	ASIM_LOCUS304	Anisakis simplex	Metalloendopeptidase
A2.transcripts:Locus_8875_Transcript_6_9_Confidence_0.625_Length_1927	Anisakis	A0A0M3KD52	85.2	399	1.02e-225	2.15082961910796e-06	7.34478	TrEMBL	A0A0M3KD52_ANISI	NA	399	NA	ASIM_LOCUS18300	Anisakis simplex	BPI2 domain-containing protein
A2.transcripts:Locus_4101_Transcript_2_9_Confidence_0.071_Length_972	Anisakis	A0A0M3K8Z4	87.5	288	5.08e-167	0.00873815817732817	7.33984	TrEMBL	A0A0M3K8Z4_ANISI	NA	768	NA	ASIM_LOCUS16842	Anisakis simplex	SSD domain-containing protein
A0.A6.NODE_11162_length_1432_cov_73.358517_g5460_i2	Anisakis	A0A0M3J3M0	78.5	93	2.01e-39	0.000936342403896268	7.33883	TrEMBL	A0A0M3J3M0_ANISI	NA	135	NA	ASIM_LOCUS2002	Anisakis simplex	Col_cuticle_N domain-containing protein
A0.A5.NODE_26508_length_899_cov_176.977804_g6334_i2	Anisakis	A0A0M3KDS0	93.7	95	4.79e-50	0.000385625947542277	7.33351	TrEMBL	A0A0M3KDS0_ANISI	NA	90	NA	ASIM_LOCUS18518	Anisakis simplex	BHLH domain-containing protein
A2.transcripts:Locus_8857_Transcript_7_16_Confidence_0.476_Length_1517	Anisakis	KHN72938.1	61.9	231	7.13e-88	0.000232380931395833	7.33316	Nr	KHN72938	Calmodulin-like protein 5 [Toxocara canis]	247	INV	CALML5	Toxocara canis	Calmodulin-like protein 5
A0.A2.NODE_5343_length_776_cov_186.938420_g4558_i0	Anisakis	RCN43626.1	52.9	70	2.77e-10	0.0266330398451047	7.3107	Nr	RCN43626	shTK domain protein [Ancylostoma caninum]	171	INV	NA	Ancylostoma caninum	shTK domain protein
A0.A2.NODE_915_length_1804_cov_6813.442254_g750_i0	Anisakis	XP_001901765.1	42.3	149	5.22e-14	0.0211265984751598	7.3097	Nr	XP_001901765	epicuticlin [Brugia malayi]	187	INV	NA	Brugia malayi	epicuticlin
A2.transcripts:Locus_3830_Transcript_8_41_Confidence_0.297_Length_2645	Anisakis	KHN75632.1	48.2	280	2.67e-50	0.00159667349856683	7.27948	Nr	KHN75632	Zinc finger protein [Toxocara canis]	517	INV	ZNF554	Toxocara canis	Zinc finger protein
A0.A0.NODE_37589_length_274_cov_2.118721_g29289_i0	Anisakis	A0A0M3IY87	80.6	36	1.30e-06	0.010582525215743	7.23684	TrEMBL	A0A0M3IY87_ANISI	NA	706	NA	ASIM_LOCUS120	Anisakis simplex	DUF5641 domain-containing protein
A1.A1.R3367614	Anisakis	A0A0M3JVF9	97.3	37	3.10e-10	1.65943931841948e-07	7.23267	TrEMBL	A0A0M3JVF9_ANISI	NA	1344	NA	ASIM_LOCUS11678	Anisakis simplex	CTF/NF-I domain-containing protein
A1.A4.J2387528	Anisakis	A0A0M3JY27	96.8	63	1.25e-30	0.00102543591383582	7.23032	TrEMBL	A0A0M3JY27_ANISI	NA	672	NA	ASIM_LOCUS12752	Anisakis simplex	Helicase ATP-binding domain-containing protein
A2.transcripts:Locus_5913_Transcript_18_21_Confidence_0.571_Length_1835	Anisakis	A0A0M3JUP3	84.5	465	1.13e-277	0.00133356835392239	7.21939	TrEMBL	A0A0M3JUP3_ANISI	NA	394	NA	ASIM_LOCUS11379	Anisakis simplex	Aspartate aminotransferase
A1.A0.S862063	Anisakis	A0A158PPG8	100	68	1.56e-36	0.000663540461523409	7.20919	TrEMBL	A0A158PPG8_ANISI	NA	876	NA	ASIM_LOCUS13997	Anisakis simplex	SSD domain-containing protein
A2.transcripts:Locus_3_Transcript_38556_70181_Confidence_0.000_Length_3478	Anisakis	KHN84647.1	73.9	253	5.33e-116	0.00873815817732817	7.19282	Nr	KHN84647	Zinc transporter ZIP8 [Toxocara canis]	418	INV	Slc39a8	Toxocara canis	Zinc transporter ZIP8
A2.transcripts:Locus_13636_Transcript_2_4_Confidence_0.600_Length_945	Anisakis	F1LF51	95.0	160	1.37e-107	0.0103940221166384	7.19048	TrEMBL	F1LF51_ASCSU	NADH dehydrogenase [ubiquinone] 1 beta subcomplex subunit 9	163	NA	NA	Ascaris suum	Complex I-B22
A0.A1.NODE_22381_length_1006_cov_192.891374_g6629_i4	Anisakis	KHN70768.1	52.5	120	4.13e-34	6.04426787769164e-05	7.1787	Nr	KHN70768	Ethylmalonyl-CoA decarboxylase [Toxocara canis]	446	INV	echdc1	Toxocara canis	Ethylmalonyl-CoA decarboxylase
A2.transcripts:Locus_3_Transcript_14761_70181_Confidence_0.000_Length_1717	Anisakis	A0A183UQP8	72.7	99	7.60e-39	0.0122109554601841	7.177	TrEMBL	A0A183UQP8_TOXCA	NA	122	NA	TCNE_LOCUS10818	Toxocara canis	Thioredoxin domain-containing protein 17
A2.transcripts:Locus_9264_Transcript_3_5_Confidence_0.400_Length_474	Anisakis	KHN73445.1	73.1	104	4.14e-45	0.000203782023754059	7.16434	Nr	KHN73445	Peroxidase mlt-7 [Toxocara canis]	569	INV	mlt-7	Toxocara canis	Peroxidase mlt-7
A1.A5.R3331586	Anisakis	KHN72938.1	60.8	245	2.20e-92	4.36961928572662e-16	7.16378	Nr	KHN72938	Calmodulin-like protein 5 [Toxocara canis]	247	INV	CALML5	Toxocara canis	Calmodulin-like protein 5
A2.transcripts:Locus_3_Transcript_63500_70181_Confidence_0.000_Length_795	Anisakis	KHN79692.1	53.6	138	1.14e-40	0.00435914673487635	7.15052	Nr	KHN79692	Erythroid differentiation-related factor 1 [Toxocara canis]	1212	INV	EDRF1	Toxocara canis	Erythroid differentiation-related factor 1
A2.transcripts:Locus_18786_Transcript_1_1_Confidence_0.000_Length_463	Anisakis	KHN73562.1	58.1	93	2.05e-24	0.000746565380440705	7.14077	Nr	KHN73562	Solute carrier family 22 member 4 [Toxocara canis]	504	INV	SLC22A4	Toxocara canis	Solute carrier family 22 member 4
A0.A1.NODE_38563_length_346_cov_3.870968_g24752_i0	Anisakis	A0A0M3IBY8	40.3	77	8.75e-10	0.00358158506129157	7.13695	TrEMBL	A0A0M3IBY8_ASCLU	NA	178	NA	NA	Ascaris lumbricoides	Apple domain-containing protein
A2.transcripts:Locus_1836_Transcript_7_8_Confidence_0.438_Length_1930	Anisakis	A0A0M3J1G1	95.7	396	6.02e-272	0.00295406310128972	7.13672	TrEMBL	A0A0M3J1G1_ANISI	NA	396	NA	ASIM_LOCUS1242	Anisakis simplex	SprT-like domain-containing protein
A1.A1.R3416928	Anisakis	A0A0B2V1J0	54.7	298	9.67e-96	0.000168789358895193	7.13234	TrEMBL	A0A0B2V1J0_TOXCA	NA	312	NA	Tcan_16738	Toxocara canis	ZP domain-containing protein
A2.transcripts:Locus_8857_Transcript_16_16_Confidence_0.286_Length_1586	Anisakis	KHN72938.1	60.8	245	4.91e-91	0.000547486900061718	7.12959	Nr	KHN72938	Calmodulin-like protein 5 [Toxocara canis]	247	INV	CALML5	Toxocara canis	Calmodulin-like protein 5
A2.transcripts:Locus_7211_Transcript_2_2_Confidence_0.333_Length_612	Anisakis	A0A0M3J3G0	99.3	139	6.06e-66	1.60462125236866e-07	7.11436	TrEMBL	A0A0M3J3G0_ANISI	NA	339	NA	ASIM_LOCUS1943	Anisakis simplex	Col_cuticle_N domain-containing protein
A0.A2.NODE_26650_length_221_cov_11.588542_g25462_i0	Anisakis	KHN74782.1	58.0	69	2.06e-14	0.00416941927854803	7.11266	Nr	KHN74782	Aryl hydrocarbon receptor nuclear translocator-like protein 2, partial [Toxocara canis]	395	INV	ARNTL2	Toxocara canis	Aryl hydrocarbon receptor nuclear translocator-like protein 2
A2.transcripts:Locus_31773_Transcript_1_1_Confidence_0.000_Length_231	Anisakis	A0A0M3IBY8	46.1	76	2.17e-14	0.0276640378262455	7.10665	TrEMBL	A0A0M3IBY8_ASCLU	NA	178	NA	NA	Ascaris lumbricoides	Apple domain-containing protein
A2.transcripts:Locus_919_Transcript_16_29_Confidence_0.083_Length_359	Anisakis	AZA15223.1	91.2	57	7.78e-26	0.0108418756278188	7.09519	Nr	AZA15223	peptide transporter family 1 [Anisakis simplex]	770	INV	pept-1	Anisakis simplex	peptide transporter family 1
A2.transcripts:Locus_4183_Transcript_4_31_Confidence_0.192_Length_1146	Anisakis	A0A0M3KC38	90.9	220	6.64e-141	0.000375906222096874	7.08208	TrEMBL	A0A0M3KC38_ANISI	NA	409	NA	ASIM_LOCUS17936	Anisakis simplex	Carboxylic ester hydrolase
A2.transcripts:Locus_9144_Transcript_1_1_Confidence_0.000_Length_1293	Anisakis	KHN85975.1	75.6	168	1.29e-83	3.96835392421948e-06	7.07624	Nr	KHN85975	Sushi, von Willebrand factor type A, EGF and pentraxin domain-containing protein 1 [Toxocara canis]	470	INV	Svep1	Toxocara canis	Sushi, von Willebrand factor type A, EGF and pentraxin domain-containing protein 1
A0.A2.NODE_13479_length_383_cov_40.968927_g12291_i0	Anisakis	A0A0M3K845	76.5	81	1.39e-31	0.00451660367443949	7.07396	TrEMBL	A0A0M3K845_ANISI	NA	550	NA	NA	Anisakis simplex	Flavin-containing monooxygenase
A0.A4.NODE_7315_length_2483_cov_1379.219492_g3577_i1	Anisakis	ABV55106.1	100	69	7.48e-33	1.04504933110454e-07	7.06541	Nr	ABV55106	Ani s 9 allergen precursor [Anisakis simplex]	147	INV	NA	Anisakis simplex	Ani s 9 allergen precursor
A2.transcripts:Locus_15622_Transcript_13_14_Confidence_0.081_Length_416	Anisakis	P24882.2	90.5	21	1.91e-06	0.000475342762108152	7.04393	Swiss-Prot	COX2_ASCSU	RecName: Full=Cytochrome c oxidase subunit 2; AltName: Full=Cytochrome c oxidase polypeptide II	232	INV	NA	Ascaris suum	Cytochrome c oxidase subunit 2
A0.A4.NODE_23025_length_676_cov_2.319685_g11786_i0	Anisakis	A0A0M3JU41	92.5	107	3.30e-48	0.000795635866260377	7.03593	TrEMBL	A0A0M3JU41_ANISI	NA	134	NA	ASIM_LOCUS11144	Anisakis simplex	BHLH domain-containing protein
A0.A4.NODE_37197_length_244_cov_1.083744_g25542_i0	Anisakis	KHN83246.1	67.9	81	1.54e-30	0.00691767658186531	7.03159	Nr	KHN83246	IgGFc-binding protein [Toxocara canis]	929	INV	FCGBP	Toxocara canis	IgGFc-binding protein
A0.A0.NODE_6315_length_2303_cov_2051.065391_g3293_i2	Anisakis	CRZ23470.1	83.2	250	8.38e-114	0.00455999030433391	7.01787	Nr	CRZ23470	Bm9204 [Brugia malayi]	429	INV	Bm9204	Brugia malayi	Bm9204
A2.transcripts:Locus_957_Transcript_3_6_Confidence_0.500_Length_1427	Anisakis	A0A0M3JZK3	84.5	425	5.05e-245	1.80678830477264e-07	7.01186	TrEMBL	A0A0M3JZK3_ANISI	NA	360	NA	ASIM_LOCUS13369	Anisakis simplex	Poly(U)-specific endoribonuclease
A2.transcripts:Locus_1_Transcript_3073_107551_Confidence_0.000_Length_5299	Anisakis	A0A1Y1KFI7	39.4	705	2.13e-129	0.0026745418201272	7.01117	TrEMBL	A0A1Y1KFI7_PHOPY	NA	745	NA	PPYR_12170	Photinus pyralis	BED-type domain-containing protein
A0.A4.NODE_2508_length_3876_cov_80.979661_g1423_i0	Anisakis	KHN84404.1	53.3	621	1.89e-218	0.00499886687236048	6.99638	Nr	KHN84404	Protein disulfide-isomerase A5 [Toxocara canis]	614	INV	PDIA5	Toxocara canis	Protein disulfide-isomerase A5
A2.transcripts:Locus_8720_Transcript_2_4_Confidence_0.667_Length_381	Anisakis	KHN79588.1	72.1	136	1.55e-56	4.508325694836e-05	6.99465	Nr	KHN79588	Hemicentin-1, partial [Toxocara canis]	1555	INV	HMCN1	Toxocara canis	Hemicentin-1
A0.A1.NODE_44246_length_285_cov_1.628440_g30432_i0	Anisakis	A0A0M3JSW7	100	28	2.32e-07	0.0123765306210106	6.99115	TrEMBL	A0A0M3JSW7_ANISI	NA	452	NA	ASIM_LOCUS10652	Anisakis simplex	Peptidase_M14 domain-containing protein
A2.transcripts:Locus_1840_Transcript_29_52_Confidence_0.409_Length_2756	Anisakis	F1KYU9	67.6	578	6.30e-290	0.00299125287356704	6.98713	TrEMBL	F1KYU9_ASCSU	NA	662	NA	NA	Ascaris suum	Acetoacetyl-CoA synthetase
A0.A6.NODE_6392_length_2144_cov_21.552246_g3759_i0	Anisakis	A0A0M3JS01	85.7	547	0.0	0.00275701502815646	6.96873	TrEMBL	A0A0M3JS01_ANISI	Fructose-2,6-bisphosphatase	529	NA	ASIM_LOCUS10278	Anisakis simplex	6-phosphofructo-2-kinase
A2.transcripts:Locus_778_Transcript_26_42_Confidence_0.407_Length_1931	Anisakis	KHN76106.1	70.3	185	5.60e-77	0.00187891619393254	6.9635	Nr	KHN76106	SEC14-like protein 2 [Toxocara canis]	395	INV	SEC14L2	Toxocara canis	SEC14-like protein 2
A2.transcripts:Locus_21596_Transcript_1_1_Confidence_0.000_Length_302	Anisakis	KHN72293.1	94.0	100	2.26e-58	0.0209993165977099	6.93725	Nr	KHN72293	Bardet-Biedl syndrome 5 -like protein [Toxocara canis]	351	INV	bbs5	Toxocara canis	Bardet-Biedl syndrome 5 -like protein
A0.A5.NODE_3428_length_3485_cov_20.273388_g1705_i0	Anisakis	KHN71977.1	46.8	686	4.03e-175	0.00655300000798283	6.92756	Nr	KHN71977	BAI1-associated protein 3 [Toxocara canis]	1685	INV	Baiap3	Toxocara canis	BAI1-associated protein 3
A2.transcripts:Locus_4_Transcript_310_510_Confidence_0.017_Length_1655	Anisakis	A0A0M3K555	100	146	6.91e-67	0.0034321269965929	6.92149	TrEMBL	A0A0M3K555_ANISI	NA	292	NA	ASIM_LOCUS15503	Anisakis simplex	Col_cuticle_N domain-containing protein
A2.transcripts:Locus_2292_Transcript_7_7_Confidence_0.211_Length_1698	Anisakis	A0A6J2VK26	29.0	214	7.62e-06	0.000626780604527262	6.89615	TrEMBL	A0A6J2VK26_CHACN	NA	472	NA	LOC115814570	Chanos chanos	Bactericidal permeability-increasing protein
A0.A6.NODE_9576_length_1637_cov_4.935945_g5487_i0	Anisakis	KHN74579.1	50.7	219	1.03e-62	0.000896828193434246	6.89333	Nr	KHN74579	Putative serine protease K12H4.7, partial [Toxocara canis]	1094	INV	K12H4.7	Toxocara canis	putative serine protease K12H4.7
A2.transcripts:Locus_24536_Transcript_1_1_Confidence_0.000_Length_157	Anisakis	KHN79588.1	82.0	50	1.89e-22	0.000249633055242233	6.89066	Nr	KHN79588	Hemicentin-1, partial [Toxocara canis]	1555	INV	HMCN1	Toxocara canis	Hemicentin-1
A0.A5.NODE_71996_length_200_cov_1.522293_g53786_i0	Anisakis	A0A0M3JXT9	80.5	41	4.66e-12	0.00641347228850847	6.87163	TrEMBL	A0A0M3JXT9_ANISI	GDP-Man:Man(1)GlcNAc(2)-PP-Dol alpha-1,3-mannosyltransferase	443	NA	ASIM_LOCUS12646	Anisakis simplex	Alpha-1,3/1,6-mannosyltransferase ALG2
A2.transcripts:Locus_5186_Transcript_2_18_Confidence_0.136_Length_352	Anisakis	A0A0B2VW50	68.3	63	1.77e-23	0.000142363812840711	6.86891	TrEMBL	A0A0B2VW50_TOXCA	NA	237	NA	SWEET10	Toxocara canis	Sugar transporter SWEET
A1.A1.R3299092	Anisakis	A0A0M3K913	100	129	9.37e-85	0.0471328463364918	6.86704	TrEMBL	A0A0M3K913_ANISI	NA	143	NA	ASIM_LOCUS16861	Anisakis simplex	Col_cuticle_N domain-containing protein
A2.transcripts:Locus_3973_Transcript_24_37_Confidence_0.197_Length_1203	Anisakis	KHN86901.1	85.9	156	1.07e-80	0.00238110169478282	6.85402	Nr	KHN86901	putative Na(+)/H(+) antiporter nhx-3 [Toxocara canis]	400	INV	nhx-3	Toxocara canis	putative Na(+)/H(+) antiporter nhx-3
A2.transcripts:Locus_766_Transcript_32_44_Confidence_0.235_Length_1461	Anisakis	KHN84579.1	84.4	205	2.36e-121	0.00575824495859213	6.83796	Nr	KHN84579	Protein twisted gastrulation [Toxocara canis]	224	INV	tsg	Toxocara canis	Protein twisted gastrulation
A2.transcripts:Locus_11536_Transcript_5_17_Confidence_0.052_Length_1621	Anisakis	KHN79275.1	89.9	189	9.17e-111	0.0118876914443363	6.8282	Nr	KHN79275	Transmembrane protein 9 [Toxocara canis]	245	INV	Tmem9	Toxocara canis	Transmembrane protein 9
A0.A4.NODE_12847_length_1663_cov_56.342170_g6331_i0	Anisakis	A0A0M3HZL9	75.4	289	4.61e-139	3.3319388654514e-05	6.8271	TrEMBL	A0A0M3HZL9_ASCLU	NA	429	NA	NA	Ascaris lumbricoides	S5 DRBM domain-containing protein
A2.transcripts:Locus_42938_Transcript_1_1_Confidence_0.000_Length_167	Anisakis	KHN73445.1	78.8	52	2.86e-19	0.000474350142663274	6.81965	Nr	KHN73445	Peroxidase mlt-7 [Toxocara canis]	569	INV	mlt-7	Toxocara canis	Peroxidase mlt-7
A2.transcripts:Locus_207_Transcript_15_29_Confidence_0.583_Length_2628	Anisakis	XP_020305173.1	46.6	738	8.78e-215	7.2097633340444e-09	6.80732	Nr	XP_020305173	processed neurogenic locus Notch protein [Loa loa]	802	INV	NA	Loa loa	processed neurogenic locus Notch protein
A2.transcripts:Locus_4_Transcript_19843_21802_Confidence_0.000_Length_4148	Anisakis	A0A158PPA4	98.2	441	2.01e-288	0.00796316242033052	6.79499	TrEMBL	A0A158PPA4_ANISI	3-demethylubiquinol 3-O-methyltransferase	574	NA	ASIM_LOCUS13438	Anisakis simplex	Ubiquinone biosynthesis O-methyltransferase, mitochondrial
A0.A2.NODE_17203_length_313_cov_20.419014_g16015_i0	Anisakis	KHN73445.1	73.2	97	2.11e-41	0.000249633055242233	6.78696	Nr	KHN73445	Peroxidase mlt-7 [Toxocara canis]	569	INV	mlt-7	Toxocara canis	Peroxidase mlt-7
A2.transcripts:Locus_15786_Transcript_11_14_Confidence_0.368_Length_1251	Anisakis	CDJ90211.1	57.7	194	6.15e-74	0.0302408814195778	6.77505	Nr	CDJ90211	Protein C50F4.8 [Haemonchus contortus]	295	INV	NA	Haemonchus contortus	Protein C50F4.8
A0.A2.NODE_8289_length_566_cov_22.707635_g7234_i0	Anisakis	KHN73445.1	79.8	188	6.82e-101	0.00118960681810008	6.76952	Nr	KHN73445	Peroxidase mlt-7 [Toxocara canis]	569	INV	mlt-7	Toxocara canis	Peroxidase mlt-7
A2.transcripts:Locus_3720_Transcript_5_24_Confidence_0.186_Length_637	Anisakis	F1L0L4	95.0	40	2.11e-18	0.0116469444632487	6.76179	TrEMBL	F1L0L4_ASCSU	NA	583	NA	NA	Ascaris suum	Diacylglycerol kinase
A0.A2.NODE_3384_length_1022_cov_116.792548_g2559_i1	Anisakis	P34804.3	77.4	53	2.18e-16	4.41760299090953e-05	6.75761	Swiss-Prot	COL40_CAEEL	RecName: Full=Cuticle collagen 40	302	INV	NA	Caenorhabditis elegans	Cuticle collagen 40
A2.transcripts:Locus_18776_Transcript_23_32_Confidence_0.487_Length_3153	Anisakis	XP_020303956.1	54.5	809	1.58e-306	0.0142066183382786	6.73546	Nr	XP_020303956	FAD binding domain-containing protein [Loa loa]	665	INV	NA	Loa loa	FAD binding domain-containing protein
A2.transcripts:Locus_25208_Transcript_1_1_Confidence_0.000_Length_318	Anisakis	KIH47691.1	90.5	105	6.98e-60	0.00266165207948386	6.72916	Nr	KIH47691	Neurotransmitter-gated ion-channel transmembrane region, partial [Ancylostoma duodenale]	168	INV	NA	Ancylostoma duodenale	Neurotransmitter-gated ion-channel transmembrane region
A0.A2.NODE_9360_length_515_cov_16.109053_g8239_i0	Anisakis	A0A158PPG8	99.4	171	1.05e-111	3.74678326465305e-07	6.7272	TrEMBL	A0A158PPG8_ANISI	NA	876	NA	ASIM_LOCUS13997	Anisakis simplex	SSD domain-containing protein
A0.A5.NODE_24581_length_1002_cov_5.331595_g7792_i2	Anisakis	A0A7E4VW61	43.9	180	2.04e-37	2.57297617826494e-05	6.71822	TrEMBL	A0A7E4VW61_PANRE	NA	393	NA	NA	Panagrellus redivivus	Peptidase A1 domain-containing protein
A2.transcripts:Locus_1_Transcript_80621_107551_Confidence_0.000_Length_2563	Anisakis	A0A158PNK3	100	271	3.36e-188	0.00270974946765164	6.71238	TrEMBL	A0A158PNK3_ANISI	NA	289	NA	ASIM_LOCUS11778	Anisakis simplex	Phosphohydroxythreonine aminotransferase
A2.transcripts:Locus_2719_Transcript_7_8_Confidence_0.412_Length_1605	Anisakis	A0A0M3JYL6	92.3	365	3.59e-249	2.66444781937603e-19	6.70682	TrEMBL	A0A0M3JYL6_ANISI	NA	372	NA	ASIM_LOCUS12974	Anisakis simplex	Metalloendopeptidase
A0.A1.NODE_36281_length_383_cov_2.674051_g22471_i0	Anisakis	A0A2G5S9R2	30.3	155	5.41e-20	0.0421045349244559	6.70567	TrEMBL	A0A2G5S9R2_9PELO	NA	529	NA	B9Z55_028937	Caenorhabditis nigoni	HTH CENPB-type domain-containing protein
A2.transcripts:Locus_5441_Transcript_3_11_Confidence_0.450_Length_1143	Anisakis	A0A0M3JUW3	99.0	105	1.87e-58	1.73403306847904e-18	6.69934	TrEMBL	A0A0M3JUW3_ANISI	NA	278	NA	ASIM_LOCUS11457	Anisakis simplex	Col_cuticle_N domain-containing protein
A0.A6.NODE_17341_length_816_cov_10.707751_g9865_i0	Anisakis	CRZ25933.1	67.1	85	1.41e-18	0.00122538691070492	6.69281	Nr	CRZ25933	BMA-CCCP-1 [Brugia malayi]	791	INV	Bma-cccp-1	Brugia malayi	BMA-CCCP-1
A0.A5.NODE_51692_length_285_cov_2.814050_g33488_i0	Anisakis	KHN72957.1	95.7	94	2.65e-57	0.037250750529335	6.69189	Nr	KHN72957	Gamma-aminobutyric acid receptor subunit beta [Toxocara canis]	547	INV	gab-1	Toxocara canis	Gamma-aminobutyric acid receptor subunit beta
A0.A2.NODE_3961_length_936_cov_2529.106946_g3374_i0	Anisakis	A0A0M3J0F9	98.6	72	6.44e-37	8.69067303128846e-11	6.68521	TrEMBL	A0A0M3J0F9_ANISI	NA	210	NA	ASIM_LOCUS892	Anisakis simplex	Col_cuticle_N domain-containing protein
A0.A2.NODE_898_length_1818_cov_163.797093_g734_i0	Anisakis	A0A0M3JSW7	86.2	390	1.02e-234	1.15603449718736e-14	6.67925	TrEMBL	A0A0M3JSW7_ANISI	NA	452	NA	ASIM_LOCUS10652	Anisakis simplex	Peptidase_M14 domain-containing protein
A0.A2.NODE_12441_length_409_cov_197.805263_g11255_i0	Anisakis	A0A7E4V901	65.1	43	3.17e-11	0.0065001286629393	6.67424	TrEMBL	A0A7E4V901_PANRE	NA	91	NA	NA	Panagrellus redivivus	ShKT domain-containing protein
A2.transcripts:Locus_4_Transcript_8364_21802_Confidence_0.001_Length_1527	Anisakis	P30170.1	81.4	113	1.41e-54	0.00208913341847183	6.67006	Swiss-Prot	ACT10_SOLTU	RecName: Full=Actin-85C	195	PLN	NA	Solanum tuberosum	Actin-85C
A1.A2.J715035	Anisakis	A0A0B2VRC7	76.9	216	3.19e-107	0.0490378700389191	6.65913	TrEMBL	A0A0B2VRC7_TOXCA	Dihydrouracil dehydrogenase	926	NA	dpyd-1	Toxocara canis	Dihydrothymine dehydrogenase
A0.A2.NODE_2610_length_1175_cov_12453.670157_g2188_i0	Anisakis	A0A0M3K913	100	71	1.20e-29	0.0106677255615185	6.64187	TrEMBL	A0A0M3K913_ANISI	NA	143	NA	ASIM_LOCUS16861	Anisakis simplex	Col_cuticle_N domain-containing protein
A2.transcripts:Locus_28609_Transcript_9_9_Confidence_0.556_Length_1701	Anisakis	A0A0M3K043	100	94	2.46e-56	0.00281067785296582	6.64011	TrEMBL	A0A0M3K043_ANISI	NA	181	NA	ASIM_LOCUS13595	Anisakis simplex	PX domain-containing protein
A1.A2.J739161	Anisakis	F1L2P6	51.2	41	8.26e-06	0.000792991062284537	6.63715	TrEMBL	F1L2P6_ASCSU	NA	543	NA	NA	Ascaris suum	Carboxypeptidase
A2.transcripts:Locus_46221_Transcript_1_1_Confidence_1.000_Length_167	Anisakis	F1KPY0	88.9	27	3.21e-07	0.00273210632354855	6.62733	TrEMBL	F1KPY0_ASCSU	NA	2012	NA	NA	Ascaris suum	Carboxypeptidase
A0.A2.NODE_1583_length_1480_cov_115.104755_g988_i1	Anisakis	A0A0M3JUD9	94.2	345	1.83e-117	2.66016365532235e-06	6.62248	TrEMBL	A0A0M3JUD9_ANISI	NA	345	NA	ASIM_LOCUS11254	Anisakis simplex	Col_cuticle_N domain-containing protein
A2.transcripts:Locus_3727_Transcript_25_56_Confidence_0.146_Length_616	Anisakis	A0A3P6QLZ5	96.9	128	1.52e-77	0.00273978917358519	6.61855	TrEMBL	A0A3P6QLZ5_ANISI	NA	698	NA	ASIM_LOCUS13480	Anisakis simplex	Protein kinase domain-containing protein
A0.A5.NODE_50119_length_297_cov_2.948819_g31916_i0	Anisakis	A0A0M3KGG7	96.8	31	1.44e-09	0.0108928564820131	6.61248	TrEMBL	A0A0M3KGG7_ANISI	NA	227	NA	ASIM_LOCUS19466	Anisakis simplex	Col_cuticle_N domain-containing protein
A2.transcripts:Locus_234_Transcript_44_98_Confidence_0.069_Length_3185	Anisakis	KHN75780.1	68.6	382	3.83e-166	0.0225810285409843	6.60762	Nr	KHN75780	NFX1-type zinc finger-containing protein 1 [Toxocara canis]	1106	INV	ZNFX1	Toxocara canis	NFX1-type zinc finger-containing protein 1
A0.A1.NODE_12194_length_1960_cov_508.136820_g5703_i0	Anisakis	A0A0M3I2D5	72.5	102	5.58e-41	0.0123444638036696	6.59554	TrEMBL	A0A0M3I2D5_ASCLU	NA	104	NA	NA	Ascaris lumbricoides	HIG1 domain-containing protein
A1.A1.S1283700	Anisakis	QRW38240.1	84.5	155	3.83e-77	0.00409431927027168	6.59422	Nr	QRW38240	glutamate-gated chloride channel subunit 4 [Parascaris univalens]	512	INV	GLC-4	Parascaris univalens	glutamate-gated chloride channel subunit 4
A0.A5.NODE_13640_length_1778_cov_5.817291_g6022_i0	Anisakis	CRZ21915.1	69.6	490	1.70e-210	0.00651608965682962	6.58753	Nr	CRZ21915	BMA-BBS-8 [Brugia malayi]	500	INV	Bma-bbs-8	Brugia malayi	BMA-BBS-8
A1.A1.S488842	Anisakis	KHN72957.1	59.4	138	1.67e-40	0.000872093524509673	6.58674	Nr	KHN72957	Gamma-aminobutyric acid receptor subunit beta [Toxocara canis]	547	INV	gab-1	Toxocara canis	Gamma-aminobutyric acid receptor subunit beta
A2.transcripts:Locus_10957_Transcript_16_22_Confidence_0.371_Length_708	Anisakis	A0A0M3JUW3	99.0	105	8.77e-61	7.57909933881238e-05	6.5828	TrEMBL	A0A0M3JUW3_ANISI	NA	278	NA	ASIM_LOCUS11457	Anisakis simplex	Col_cuticle_N domain-containing protein
A2.transcripts:Locus_3_Transcript_39229_70181_Confidence_0.001_Length_2878	Anisakis	A0A0M3I2K1	32.9	280	9.62e-32	0.000136055976183381	6.57759	TrEMBL	A0A0M3I2K1_ASCLU	NA	290	NA	NA	Ascaris lumbricoides	Glycine N-acyltransferase-like protein
A0.A2.NODE_16353_length_326_cov_38.181818_g15165_i0	Anisakis	A0A0M3HRW4	61.3	62	3.24e-16	0.000807086033875698	6.56122	TrEMBL	A0A0M3HRW4_ASCLU	NA	394	NA	NA	Ascaris lumbricoides	UDP-glucuronosyltransferase
A2.transcripts:Locus_1_Transcript_38806_107551_Confidence_0.000_Length_1507	Anisakis	A0A7I5E8A9	36.2	370	4.54e-61	0.0020697637557385	6.55254	TrEMBL	A0A7I5E8A9_HAECO	NA	373	NA	NA	Haemonchus contortus	G_PROTEIN_RECEP_F1_2 domain-containing protein
A2.transcripts:Locus_1707_Transcript_133_139_Confidence_0.201_Length_9917	Anisakis	A0A0M3JTS2	87.8	254	8.82e-125	0.0174890149932955	6.54126	TrEMBL	A0A0M3JTS2_ANISI	NA	421	NA	ASIM_LOCUS11007	Anisakis simplex	Deubiquitinating enzyme A
A2.transcripts:Locus_524_Transcript_4_9_Confidence_0.467_Length_1439	Anisakis	A0A0M3KCL0	60.9	192	2.11e-41	1.27839959179421e-05	6.53815	TrEMBL	A0A0M3KCL0_ANISI	NA	327	NA	ASIM_LOCUS18106	Anisakis simplex	Col_cuticle_N domain-containing protein
A0.A1.NODE_718_length_5979_cov_190.477842_g301_i1	Anisakis	A0A3P6Q0U5	71.5	459	2.77e-181	0.00712718441681564	6.53557	TrEMBL	A0A3P6Q0U5_ANISI	NA	648	NA	ASIM_LOCUS9892	Anisakis simplex	Phosphate transporter
A2.transcripts:Locus_3_Transcript_23155_70181_Confidence_0.000_Length_1263	Anisakis	CDJ86857.1	54.1	218	1.27e-66	0.0143799399045401	6.5309	Nr	CDJ86857	PDZ domain containing protein [Haemonchus contortus]	487	INV	NA	Haemonchus contortus	PDZ domain containing protein
A2.transcripts:Locus_1071_Transcript_32_57_Confidence_0.127_Length_1385	Anisakis	KHN73462.1	75.6	315	1.52e-112	0.0114354366868185	6.5289	Nr	KHN73462	Troponin T [Toxocara canis]	394	INV	mup-2	Toxocara canis	Troponin T
A2.transcripts:Locus_3_Transcript_10771_70181_Confidence_0.000_Length_681	Anisakis	A0A0M3HMZ7	63.1	103	1.49e-40	0.00451660367443949	6.52644	TrEMBL	A0A0M3HMZ7_ASCLU	NA	210	NA	NA	Ascaris lumbricoides	TYR_PHOSPHATASE_2 domain-containing protein
A2.transcripts:Locus_1_Transcript_74976_107551_Confidence_0.000_Length_4209	Anisakis	KHN74521.1	71.5	1245	0.0	0.0233301087616021	6.52419	Nr	KHN74521	5-oxoprolinase [Toxocara canis]	1346	INV	OPLAH	Toxocara canis	5-oxoprolinase
A0.A5.NODE_3059_length_3624_cov_684.296844_g986_i2	Anisakis	KHN79203.1	76.2	508	5.13e-282	0.00572345599348493	6.5225	Nr	KHN79203	Neutral and basic amino acid transport protein rBAT [Toxocara canis]	766	INV	Slc3a1	Toxocara canis	Neutral and basic amino acid transport protein rBAT
A0.A4.NODE_13127_length_1627_cov_71.773014_g6433_i1	Anisakis	A0A0M3I2K1	25.3	383	2.25e-25	0.0351544927026705	6.51646	TrEMBL	A0A0M3I2K1_ASCLU	NA	290	NA	NA	Ascaris lumbricoides	Glycine N-acyltransferase-like protein
A1.A2.J730567	Anisakis	A0A0M3J0F9	80.0	35	3.76e-09	0.00394787629863172	6.51328	TrEMBL	A0A0M3J0F9_ANISI	NA	210	NA	ASIM_LOCUS892	Anisakis simplex	Col_cuticle_N domain-containing protein
A2.transcripts:Locus_2907_Transcript_11_18_Confidence_0.226_Length_1461	Anisakis	KHN87913.1	62.1	280	7.31e-110	0.003448642861415	6.51036	Nr	KHN87913	rRNA-processing protein UTP23 -like protein [Toxocara canis]	325	INV	UTP23	Toxocara canis	rRNA-processing protein UTP23 -like protein
A1.A1.J3321344	Anisakis	KHN76622.1	66.9	175	1.75e-67	0.00929708936553963	6.50297	Nr	KHN76622	Mitochondrial ribosome-associated GTPase 2 [Toxocara canis]	383	INV	MTG2	Toxocara canis	Mitochondrial ribosome-associated GTPase 2
A1.A1.S3044460	Anisakis	A0A0M3JI22	63.8	58	2.49e-20	0.0318147668695127	6.50123	TrEMBL	A0A0M3JI22_ANISI	NA	74	NA	ASIM_LOCUS7054	Anisakis simplex	Phospholipase A(2)
A2.transcripts:Locus_4_Transcript_50_510_Confidence_0.013_Length_1836	Anisakis	AZA15222.1	97.3	73	1.54e-35	0.0177091246276428	6.48583	Nr	AZA15222	cuticle collagen 34 [Anisakis simplex]	292	INV	col-34	Anisakis simplex	cuticle collagen 34
A2.transcripts:Locus_6285_Transcript_1_1_Confidence_0.000_Length_665	Anisakis	KHN73445.1	66.8	190	2.25e-79	0.000364662648930066	6.4834	Nr	KHN73445	Peroxidase mlt-7 [Toxocara canis]	569	INV	mlt-7	Toxocara canis	Peroxidase mlt-7
A1.A0.R3523620	Anisakis	A0A0M3K6C8	94.8	232	2.09e-140	1.36835923989366e-07	6.47657	TrEMBL	A0A0M3K6C8_ANISI	NA	478	NA	ASIM_LOCUS15926	Anisakis simplex	BED-type domain-containing protein
A2.transcripts:Locus_728_Transcript_46_58_Confidence_0.188_Length_2150	Anisakis	KHN80558.1	69.7	218	6.55e-102	5.75443227315739e-22	6.47484	Nr	KHN80558	Retinol dehydrogenase 16 [Toxocara canis]	396	INV	RDH16	Toxocara canis	Retinol dehydrogenase 16
A0.A5.NODE_13180_length_1823_cov_6.978652_g5846_i0	Anisakis	CDJ90737.1	34.9	86	1.08e-10	1.2059122993167e-06	6.47024	Nr	CDJ90737	Protein T21D12.14 [Haemonchus contortus]	132	INV	NA	Haemonchus contortus	Protein T21D12.14
A0.A5.NODE_38726_length_470_cov_4.194379_g20776_i0	Anisakis	A0A158PPJ7	99.2	130	1.80e-88	0.0113415377240714	6.45927	TrEMBL	A0A158PPJ7_ANISI	NA	309	NA	ASIM_LOCUS14277	Anisakis simplex	Metalloendopeptidase
A2.transcripts:Locus_15_Transcript_25_29_Confidence_0.222_Length_1237	Anisakis	P17657.2	91.3	23	2.38e-07	0.00519911674490268	6.45386	Swiss-Prot	DPY13_CAEEL	RecName: Full=Cuticle collagen dpy-13; AltName: Full=Protein dumpy-13	302	INV	NA	Caenorhabditis elegans	Cuticle collagen dpy-13
A0.A2.NODE_3075_length_1075_cov_17.065010_g2600_i0	Anisakis	A0A0M3KB28	54.7	276	5.66e-97	0.00902100250107927	6.44523	TrEMBL	A0A0M3KB28_ANISI	NA	354	NA	ASIM_LOCUS17576	Anisakis simplex	Protein kinase domain-containing protein
A2.transcripts:Locus_1948_Transcript_14_34_Confidence_0.143_Length_1592	Anisakis	A0A0M3I918	95.9	122	1.72e-65	0.00400435451545689	6.44375	TrEMBL	A0A0M3I918_ASCLU	NA	122	NA	NA	Ascaris lumbricoides	Histone H2B
A2.transcripts:Locus_25315_Transcript_1_1_Confidence_0.000_Length_290	Anisakis	KHN88986.1	63.5	74	1.61e-23	0.0267477513381202	6.44003	Nr	KHN88986	WD repeat-containing protein 60 [Toxocara canis]	891	INV	Wdr60	Toxocara canis	WD repeat-containing protein 60
A1.A2.J698670	Anisakis	A0A0M3JW99	100	32	1.02e-12	0.00358627413669667	6.42808	TrEMBL	A0A0M3JW99_ANISI	NA	199	NA	ASIM_LOCUS12016	Anisakis simplex	Ig-like domain-containing protein
A2.transcripts:Locus_25741_Transcript_16_23_Confidence_0.419_Length_1873	Anisakis	A0A0M3K677	90.0	190	3.22e-108	0.00425012667512026	6.42801	TrEMBL	A0A0M3K677_ANISI	NA	428	NA	ASIM_LOCUS15875	Anisakis simplex	Isopentenyl-diphosphate Delta-isomerase
A1.A2.J738769	Anisakis	CDJ90211.1	66.7	48	1.15e-12	0.0484886853970067	6.42685	Nr	CDJ90211	Protein C50F4.8 [Haemonchus contortus]	295	INV	NA	Haemonchus contortus	Protein C50F4.8
A0.A5.NODE_14013_length_1741_cov_15.767373_g6065_i1	Anisakis	KHN86737.1	69.7	76	5.21e-32	0.00710024052896395	6.41683	Nr	KHN86737	Warthog protein 5 [Toxocara canis]	187	INV	wrt-5	Toxocara canis	Warthog protein 5
A0.A4.NODE_24298_length_599_cov_2.059140_g12844_i0	Anisakis	KHN81865.1	74.1	185	1.25e-85	0.000269991081419398	6.4149	Nr	KHN81865	Globin-like protein 9, partial [Toxocara canis]	243	INV	glb-9	Toxocara canis	Globin-like protein 9
A0.A1.NODE_13237_length_1839_cov_28.599887_g6160_i0	Anisakis	KHN73468.1	60.2	261	1.65e-103	0.0406282819935729	6.40681	Nr	KHN73468	putative methyltransferase B0303.2 [Toxocara canis]	266	INV	NA	Toxocara canis	putative methyltransferase B0303.2
A2.transcripts:Locus_5360_Transcript_2_24_Confidence_0.640_Length_2276	Anisakis	KHN86894.1	65.7	286	7.55e-114	0.0220420322616529	6.40666	Nr	KHN86894	UV radiation resistance-associated protein [Toxocara canis]	391	INV	UVRAG	Toxocara canis	UV radiation resistance-associated protein
A0.A1.NODE_12945_length_1871_cov_221.740576_g6034_i0	Anisakis	A0A0M3JIG2	96.8	63	4.27e-27	0.00582002868442429	6.40087	TrEMBL	A0A0M3JIG2_ANISI	NA	109	NA	ASIM_LOCUS7200	Anisakis simplex	Histone domain-containing protein
A0.A2.NODE_21442_length_263_cov_8.350427_g20254_i0	Anisakis	NP_502252.3	32.9	85	1.59e-08	0.0315768045121053	6.39457	Nr	NP_502252	CUTiclin-Like [Caenorhabditis elegans]	969	INV	cutl-27	Caenorhabditis elegans	CUTiclin-Like
A2.transcripts:Locus_12353_Transcript_3_11_Confidence_0.250_Length_438	Anisakis	KHN76106.1	75.0	48	1.42e-17	0.0070530072382347	6.39449	Nr	KHN76106	SEC14-like protein 2 [Toxocara canis]	395	INV	SEC14L2	Toxocara canis	SEC14-like protein 2
A2.transcripts:Locus_1510_Transcript_69_126_Confidence_0.028_Length_2092	Anisakis	A0A0M3J2R1	96.5	114	3.44e-60	0.00677846318814071	6.38419	TrEMBL	A0A0M3J2R1_ANISI	NA	423	NA	ASIM_LOCUS1694	Anisakis simplex	DUF1758 domain-containing protein
A2.transcripts:Locus_3101_Transcript_6_21_Confidence_0.500_Length_1369	Anisakis	KHN88251.1	55.6	297	3.53e-110	0.00735610855143278	6.37963	Nr	KHN88251	Methyltransferase-like protein 13 [Toxocara canis]	365	INV	METTL13	Toxocara canis	Methyltransferase-like protein 13
A2.transcripts:Locus_13141_Transcript_29_53_Confidence_0.430_Length_1923	Anisakis	KHN79848.1	73.7	380	3.31e-198	0.00705336093472953	6.37859	Nr	KHN79848	39S ribosomal protein L2, mitochondrial [Toxocara canis]	328	INV	MRPL2	Toxocara canis	39S ribosomal protein L2, mitochondrial
A0.A2.NODE_17261_length_312_cov_22.893993_g16073_i0	Anisakis	CDW60789.1	95.8	71	2.25e-41	0.0176675528679127	6.37089	Nr	CDW60789	Cell wall-associated hydrolase [Trichuris trichiura]	215	INV	NA	Trichuris trichiura	Cell wall-associated hydrolase
A2.transcripts:Locus_919_Transcript_25_29_Confidence_0.389_Length_2815	Anisakis	AZA15243.1	95.3	490	2.37e-298	0.000171292178474949	6.36947	Nr	AZA15243	peptide transporter family 1 [Anisakis pegreffii]	862	INV	pept-1	Anisakis pegreffii	peptide transporter family 1
A1.A2.J683788	Anisakis	KHN79588.1	92.9	28	2.19e-09	0.00408537538359818	6.36647	Nr	KHN79588	Hemicentin-1, partial [Toxocara canis]	1555	INV	HMCN1	Toxocara canis	Hemicentin-1
A2.transcripts:Locus_9984_Transcript_12_13_Confidence_0.389_Length_1358	Anisakis	A0A4U8UYQ3	36.4	184	5.13e-20	0.0351349404430959	6.36352	TrEMBL	A0A4U8UYQ3_STECR	NA	343	NA	L596_005267	Steinernema carpocapsae	G_PROTEIN_RECEP_F1_2 domain-containing protein
A1.A4.R2503105	Anisakis	KHN73445.1	86.1	79	4.12e-38	0.0378503217135446	6.36322	Nr	KHN73445	Peroxidase mlt-7 [Toxocara canis]	569	INV	mlt-7	Toxocara canis	Peroxidase mlt-7
A2.transcripts:Locus_4203_Transcript_23_28_Confidence_0.299_Length_397	Anisakis	A0A0M3IZM4	94.6	37	2.66e-08	0.0462821317362747	6.35092	TrEMBL	A0A0M3IZM4_ANISI	NA	663	NA	ASIM_LOCUS607	Anisakis simplex	Carboxypeptidase
A2.transcripts:Locus_1_Transcript_28077_107551_Confidence_0.000_Length_531	Anisakis	OZC12132.1	78.4	97	3.69e-44	0.0368832155472171	6.35003	Nr	OZC12132	GCC2 and GCC3 [Onchocerca flexuosa]	469	INV	NA	Onchocerca flexuosa	GCC2 and GCC3
A2.transcripts:Locus_3070_Transcript_10_10_Confidence_0.353_Length_1163	Anisakis	CDQ01460.1	58.8	51	4.02e-11	8.90767513228152e-07	6.34702	Nr	CDQ01460	Bm812, partial [Brugia malayi]	105	INV	Bm812	Brugia malayi	Bm812
A2.transcripts:Locus_3524_Transcript_73_132_Confidence_0.280_Length_1303	Anisakis	VMP19955.1	90.0	110	2.51e-59	0.017248068444336	6.34502	Nr	VMP19955	Uncharacterised protein [Streptococcus pneumoniae]	126	BCT	NA	Streptococcus pneumoniae	Uncharacterised protein
A2.transcripts:Locus_22306_Transcript_1_2_Confidence_0.333_Length_841	Anisakis	A0A0M3I2K1	30.0	273	1.94e-33	4.4330212497116e-09	6.34274	TrEMBL	A0A0M3I2K1_ASCLU	NA	290	NA	NA	Ascaris lumbricoides	Glycine N-acyltransferase-like protein
A2.transcripts:Locus_2741_Transcript_1_1_Confidence_0.000_Length_583	Anisakis	XP_020302078.1	88.7	194	8.23e-122	0.00185697630640282	6.33838	Nr	XP_020302078	angiogenesis inhibito [Loa loa]	893	INV	NA	Loa loa	angiogenesis inhibito
A2.transcripts:Locus_4933_Transcript_3_5_Confidence_0.750_Length_588	Anisakis	A0A0B2V3Y0	69.5	82	5.75e-34	0.0105758410798526	6.33721	TrEMBL	A0A0B2V3Y0_TOXCA	NA	335	NA	b3gnt5-b	Toxocara canis	Hexosyltransferase
A2.transcripts:Locus_3101_Transcript_13_21_Confidence_0.400_Length_1247	Anisakis	KHN88251.1	57.1	273	2.94e-101	0.0338887715230327	6.33493	Nr	KHN88251	Methyltransferase-like protein 13 [Toxocara canis]	365	INV	METTL13	Toxocara canis	Methyltransferase-like protein 13
A2.transcripts:Locus_1_Transcript_31140_107551_Confidence_0.000_Length_1817	Anisakis	A0A5S6PMG5	68.9	135	7.01e-56	0.0144368175796172	6.33324	TrEMBL	A0A5S6PMG5_BRUMA	NA	465	NA	Bm1_50350	Brugia malayi	Flavin-containing monooxygenase
A2.transcripts:Locus_8307_Transcript_3_4_Confidence_0.400_Length_405	Anisakis	A0A0B2UWU0	83.5	121	8.73e-62	0.025355895629366	6.32782	TrEMBL	A0A0B2UWU0_TOXCA	NA	257	NA	Tcan_18243	Toxocara canis	BAR domain-containing protein
A2.transcripts:Locus_4_Transcript_19130_21802_Confidence_0.000_Length_1597	Anisakis	KHN86441.1	94.3	262	2.85e-156	0.0296166572856419	6.32578	Nr	KHN86441	Double-strand break repair protein mre-11 [Toxocara canis]	1009	INV	mre-11	Toxocara canis	Double-strand break repair protein mre-11
A0.A2.NODE_9276_length_519_cov_19.242857_g8158_i0	Anisakis	F1KSF1	60.2	108	7.18e-28	0.0167554107080632	6.31913	TrEMBL	F1KSF1_ASCSU	NA	744	NA	NA	Ascaris suum	SAM domain-containing protein
A2.transcripts:Locus_191_Transcript_10_16_Confidence_0.405_Length_739	Anisakis	A0A0N4VJE3	74.7	95	1.28e-34	0.000544775751375235	6.30926	TrEMBL	A0A0N4VJE3_ENTVE	NA	113	NA	EVEC_LOCUS10290	Enterobius vermicularis	60S ribosomal protein L34
A2.transcripts:Locus_2551_Transcript_1_16_Confidence_0.188_Length_1056	Anisakis	A0A0M3HRW4	63.0	192	6.20e-82	1.52759268560359e-14	6.30112	TrEMBL	A0A0M3HRW4_ASCLU	NA	394	NA	NA	Ascaris lumbricoides	UDP-glucuronosyltransferase
A2.transcripts:Locus_2559_Transcript_19_56_Confidence_0.111_Length_437	Anisakis	A0A0M3J2X1	67.2	134	1.75e-52	0.000289746033251787	6.29111	TrEMBL	A0A0M3J2X1_ANISI	NA	237	NA	ASIM_LOCUS1754	Anisakis simplex	Glucuronosyltransferase
A1.A0.R3558287	Anisakis	A0A0B2VFD6	78.3	120	4.64e-61	2.43016255352153e-06	6.28782	TrEMBL	A0A0B2VFD6_TOXCA	NA	450	NA	Tcan_13196	Toxocara canis	Neur_chan_LBD domain-containing protein
A2.transcripts:Locus_8223_Transcript_3_3_Confidence_0.417_Length_637	Anisakis	A0A0M3IEE8	65.5	110	1.13e-39	0.00668535321696611	6.28725	TrEMBL	A0A0M3IEE8_ASCLU	NA	416	NA	NA	Ascaris lumbricoides	Structure-specific endonuclease subunit SLX1 homolog
A2.transcripts:Locus_1547_Transcript_5_7_Confidence_0.143_Length_854	Anisakis	A0A0M3K4C2	78.2	239	3.61e-141	0.000293675826748202	6.28005	TrEMBL	A0A0M3K4C2_ANISI	NA	238	NA	ASIM_LOCUS15220	Anisakis simplex	VWFD domain-containing protein
A1.A5.J3341109	Anisakis	A0A0M3JRT4	99.3	148	2.64e-101	0.00727778745829378	6.27585	TrEMBL	A0A0M3JRT4_ANISI	NA	557	NA	ASIM_LOCUS10193	Anisakis simplex	RING-type domain-containing protein
A2.transcripts:Locus_1738_Transcript_1_2_Confidence_0.333_Length_473	Anisakis	OZC12132.1	77.8	72	2.74e-27	0.00761593773758283	6.27135	Nr	OZC12132	GCC2 and GCC3 [Onchocerca flexuosa]	469	INV	NA	Onchocerca flexuosa	GCC2 and GCC3
A2.transcripts:Locus_13943_Transcript_2_2_Confidence_0.000_Length_576	Anisakis	CDQ01460.1	58.8	51	3.32e-12	0.000207091682317904	6.27111	Nr	CDQ01460	Bm812, partial [Brugia malayi]	105	INV	Bm812	Brugia malayi	Bm812
A2.transcripts:Locus_960_Transcript_17_47_Confidence_0.093_Length_417	Anisakis	A0A0B2V5B1	48.4	91	2.43e-17	2.13865360852237e-09	6.26063	TrEMBL	A0A0B2V5B1_TOXCA	NA	620	NA	nas-30	Toxocara canis	Metalloendopeptidase
A2.transcripts:Locus_41094_Transcript_2_2_Confidence_0.333_Length_604	Anisakis	A0A0M3JXT9	80.5	41	3.45e-10	0.00625464575175345	6.25888	TrEMBL	A0A0M3JXT9_ANISI	GDP-Man:Man(1)GlcNAc(2)-PP-Dol alpha-1,3-mannosyltransferase	443	NA	ASIM_LOCUS12646	Anisakis simplex	Alpha-1,3/1,6-mannosyltransferase ALG2
A2.transcripts:Locus_33373_Transcript_1_4_Confidence_0.750_Length_140	Anisakis	XP_001892764.1	68.4	38	1.15e-08	0.00593970698531588	6.25842	Nr	XP_001892764	putative 18.4 kDa protein T05H10.3 in chromosome II precursor, putative [Brugia malayi]	160	INV	Bm363	Brugia malayi	putative 18.4 kDa protein T05H10.3 in chromosome II precursor, putative
A2.transcripts:Locus_20056_Transcript_4_6_Confidence_0.500_Length_820	Anisakis	KHN73934.1	75.0	112	1.04e-54	0.0160648733310383	6.24713	Nr	KHN73934	Catechol O-methyltransferase domain-containing protein 1 [Toxocara canis]	250	INV	Comtd1	Toxocara canis	Catechol O-methyltransferase domain-containing protein 1
A2.transcripts:Locus_2172_Transcript_23_24_Confidence_0.036_Length_550	Anisakis	AZA15230.1	100	28	6.16e-06	0.0119806573610815	6.24235	Nr	AZA15230	serine palmitoyltransferase 2 [Anisakis pegreffii]	542	INV	sptl-2	Anisakis pegreffii	serine palmitoyltransferase 2
A2.transcripts:Locus_18657_Transcript_7_9_Confidence_0.391_Length_592	Anisakis	A0A0M3K6C8	93.3	90	1.35e-47	0.0173132455315372	6.23636	TrEMBL	A0A0M3K6C8_ANISI	NA	478	NA	ASIM_LOCUS15926	Anisakis simplex	BED-type domain-containing protein
A2.transcripts:Locus_14069_Transcript_5_7_Confidence_0.400_Length_1021	Anisakis	KHN87939.1	36.6	123	8.26e-14	3.05499351241186e-07	6.22867	Nr	KHN87939	Leucine-rich repeat protein 1 [Toxocara canis]	552	INV	LRR1	Toxocara canis	Leucine-rich repeat protein 1
A2.transcripts:Locus_14094_Transcript_1_1_Confidence_0.500_Length_607	Anisakis	A0A0M3K421	58.9	168	8.31e-68	2.24021373042982e-07	6.22667	TrEMBL	A0A0M3K421_ANISI	NA	233	NA	ASIM_LOCUS15119	Anisakis simplex	Protein kinase domain-containing protein
A0.A1.NODE_15439_length_1607_cov_4.294156_g7093_i0	Anisakis	A0A0M3JZN3	96.9	259	2.99e-171	0.000467994540548892	6.21725	TrEMBL	A0A0M3JZN3_ANISI	NA	340	NA	ASIM_LOCUS13406	Anisakis simplex	ZP domain-containing protein
A0.A2.NODE_1817_length_1399_cov_76.797810_g1511_i0	Anisakis	KHN74579.1	62.0	142	6.53e-52	0.0030411608553191	6.19718	Nr	KHN74579	Putative serine protease K12H4.7, partial [Toxocara canis]	1094	INV	K12H4.7	Toxocara canis	putative serine protease K12H4.7
A0.A4.NODE_6672_length_2599_cov_48.401095_g3431_i1	Anisakis	A0A0M3IY86	83.0	465	7.97e-270	0.0140802617617056	6.19233	TrEMBL	A0A0M3IY86_ANISI	Beta-1,2-N-acetylglucosaminyltransferase II	481	NA	ASIM_LOCUS118	Anisakis simplex	Alpha-1,6-mannosyl-glycoprotein 2-beta-N-acetylglucosaminyltransferase
A2.transcripts:Locus_2311_Transcript_14_14_Confidence_0.059_Length_923	Anisakis	A0A158Q846	61.2	67	7.86e-15	0.00656884714732669	6.19056	TrEMBL	A0A158Q846_9BILA	NA	587	NA	NA	Elaeophora elaphi	Sulfhydryl oxidase
A2.transcripts:Locus_18931_Transcript_7_9_Confidence_0.286_Length_2273	Anisakis	KHN79206.1	64.5	346	1.62e-144	6.70420606326472e-08	6.18884	Nr	KHN79206	Cuticlin-1, partial [Toxocara canis]	342	INV	cut-1	Toxocara canis	Cuticlin-1
A2.transcripts:Locus_1004_Transcript_6_6_Confidence_0.000_Length_697	Anisakis	KHN85779.1	79.3	145	3.63e-76	0.00187043286456028	6.18418	Nr	KHN85779	Short-chain dehydrogenase TIC 32, chloroplastic [Toxocara canis]	198	INV	TIC32	Toxocara canis	Short-chain dehydrogenase TIC 32, chloroplastic
A1.A1.S3302054	Anisakis	A0A0M3J0F9	79.4	102	4.25e-43	0.000778333870526791	6.18192	TrEMBL	A0A0M3J0F9_ANISI	NA	210	NA	ASIM_LOCUS892	Anisakis simplex	Col_cuticle_N domain-containing protein
A2.transcripts:Locus_6798_Transcript_2_7_Confidence_0.667_Length_704	Anisakis	A0A0M3KF66	93.8	48	4.17e-20	0.0127989139607136	6.17641	TrEMBL	A0A0M3KF66_ANISI	NA	114	NA	ASIM_LOCUS19013	Anisakis simplex	C6 domain-containing protein
A2.transcripts:Locus_3_Transcript_36285_70181_Confidence_0.000_Length_1429	Anisakis	A0A0M3JS37	100	41	3.39e-13	0.0123329712294965	6.17229	TrEMBL	A0A0M3JS37_ANISI	NA	517	NA	ASIM_LOCUS10322	Anisakis simplex	Importin subunit alpha
A0.A5.NODE_8860_length_2322_cov_19.030715_g4121_i0	Anisakis	KHN79761.1	39.3	275	3.12e-35	0.0415653996503487	6.16532	Nr	KHN79761	Ankyrin repeat domain-containing protein SOWAHC [Toxocara canis]	341	INV	Sowahc	Toxocara canis	Ankyrin repeat domain-containing protein SOWAHC
A2.transcripts:Locus_42190_Transcript_2_5_Confidence_0.429_Length_1836	Anisakis	A0A0M3K6C8	97.5	478	0.0	1.44185416317356e-07	6.15834	TrEMBL	A0A0M3K6C8_ANISI	NA	478	NA	ASIM_LOCUS15926	Anisakis simplex	BED-type domain-containing protein
A2.transcripts:Locus_36765_Transcript_1_4_Confidence_0.667_Length_714	Anisakis	A0A0M3JSM7	96.8	62	9.49e-33	0.0104202748668406	6.15768	TrEMBL	A0A0M3JSM7_ANISI	NA	310	NA	inx	Anisakis simplex	Innexin
A2.transcripts:Locus_656_Transcript_25_114_Confidence_0.093_Length_2039	Anisakis	CRZ22766.1	70.9	189	9.68e-92	0.0151235827878669	6.15728	Nr	CRZ22766	Bm2577 [Brugia malayi]	314	INV	Bm2577	Brugia malayi	Bm2577
A2.transcripts:Locus_546_Transcript_5_20_Confidence_0.194_Length_1346	Anisakis	KHN74031.1	96.8	93	1.71e-54	0.0082796923151304	6.15533	Nr	KHN74031	60S ribosomal protein L44 [Toxocara canis]	97	INV	rpl-44	Toxocara canis	60S ribosomal protein L44
A0.A5.NODE_26753_length_888_cov_3.844970_g11687_i0	Anisakis	KHN73445.1	68.3	306	2.92e-133	0.000862423670147831	6.1492	Nr	KHN73445	Peroxidase mlt-7 [Toxocara canis]	569	INV	mlt-7	Toxocara canis	Peroxidase mlt-7
A0.A5.NODE_39045_length_463_cov_5.828571_g21079_i0	Anisakis	A0A0M3J3D5	62.6	91	1.45e-36	0.0445015974372743	6.14466	TrEMBL	A0A0M3J3D5_ANISI	NA	232	NA	NA	Anisakis simplex	Protein kinase domain-containing protein
A0.A0.NODE_23750_length_516_cov_2.687636_g15467_i0	Anisakis	KHN88067.1	84.9	172	2.25e-90	0.0124050687173063	6.13409	Nr	KHN88067	Solute carrier family 23 member 2 [Toxocara canis]	555	INV	slc23a2	Toxocara canis	Solute carrier family 23 member 2
A0.A4.NODE_12179_length_1746_cov_5.652199_g6019_i0	Anisakis	A0A0M3K351	87.8	613	0.0	5.24010131328466e-05	6.12458	TrEMBL	A0A0M3K351_ANISI	NA	1384	NA	ASIM_LOCUS14796	Anisakis simplex	Asparaginase
A2.transcripts:Locus_4_Transcript_244_510_Confidence_0.011_Length_997	Anisakis	AZA15222.1	99.0	98	7.19e-55	0.0353686610471139	6.12262	Nr	AZA15222	cuticle collagen 34 [Anisakis simplex]	292	INV	col-34	Anisakis simplex	cuticle collagen 34
A0.A2.NODE_12040_length_421_cov_9.321429_g10854_i0	Anisakis	CRZ24217.1	39.4	66	9.52e-10	0.00195141400349771	6.12257	Nr	CRZ24217	Bm9822 [Brugia malayi]	177	INV	Bm9822	Brugia malayi	Bm9822
A2.transcripts:Locus_20580_Transcript_3_4_Confidence_0.444_Length_495	Anisakis	A0A0M3I2K1	36.0	139	1.11e-18	0.0277683345753571	6.1213	TrEMBL	A0A0M3I2K1_ASCLU	NA	290	NA	NA	Ascaris lumbricoides	Glycine N-acyltransferase-like protein
A0.A5.NODE_6706_length_2649_cov_10.973523_g3209_i0	Anisakis	A0A158PNB5	70.0	842	0.0	0.0123051052409473	6.11812	TrEMBL	A0A158PNB5_ANISI	NA	989	NA	ASIM_LOCUS11055	Anisakis simplex	Aminopeptidase
A2.transcripts:Locus_4_Transcript_215_510_Confidence_0.005_Length_496	Anisakis	A0A0M3J0F9	96.6	59	2.00e-29	0.00735610855143278	6.11261	TrEMBL	A0A0M3J0F9_ANISI	NA	210	NA	ASIM_LOCUS892	Anisakis simplex	Col_cuticle_N domain-containing protein
A0.A1.NODE_20635_length_1140_cov_5.643989_g9391_i0	Anisakis	KHN74579.1	53.7	203	1.14e-62	0.00430302977377831	6.10539	Nr	KHN74579	Putative serine protease K12H4.7, partial [Toxocara canis]	1094	INV	K12H4.7	Toxocara canis	putative serine protease K12H4.7
A2.transcripts:Locus_4082_Transcript_7_7_Confidence_0.000_Length_2719	Anisakis	KHN84166.1	78.4	733	0.0	0.00278775648715178	6.10483	Nr	KHN84166	Cartilage matrix protein [Toxocara canis]	713	INV	MATN1	Toxocara canis	Cartilage matrix protein
A0.A1.NODE_39570_length_333_cov_1.582707_g25757_i0	Anisakis	A0A0M3JU41	96.9	97	7.35e-47	0.0146197874134041	6.10479	TrEMBL	A0A0M3JU41_ANISI	NA	134	NA	ASIM_LOCUS11144	Anisakis simplex	BHLH domain-containing protein
A0.A1.NODE_23781_length_904_cov_1.947431_g11180_i0	Anisakis	A0A0M3IYR6	98.8	173	1.20e-119	0.000922955921466232	6.10301	TrEMBL	A0A0M3IYR6_ANISI	NA	204	NA	ASIM_LOCUS299	Anisakis simplex	Alpha-mann_mid domain-containing protein
A0.A1.NODE_21620_length_1062_cov_6.698492_g3578_i3	Anisakis	A0A0M3KEX7	99.3	141	2.28e-57	0.0160458781754636	6.09716	TrEMBL	A0A0M3KEX7_ANISI	NA	359	NA	ASIM_LOCUS18925	Anisakis simplex	Col_cuticle_N domain-containing protein
A2.transcripts:Locus_19171_Transcript_3_8_Confidence_0.769_Length_1275	Anisakis	KHN74579.1	51.7	211	3.66e-63	4.67910306871111e-05	6.09138	Nr	KHN74579	Putative serine protease K12H4.7, partial [Toxocara canis]	1094	INV	K12H4.7	Toxocara canis	putative serine protease K12H4.7
A2.transcripts:Locus_11_Transcript_88_154_Confidence_0.007_Length_349	Anisakis	A0A0M3KKG9	50.4	115	4.84e-22	0.0156224167107964	6.08604	TrEMBL	A0A0M3KKG9_ANISI	NA	106	NA	NA	Anisakis simplex	Peptidase A1 domain-containing protein
A0.A5.NODE_20558_length_1248_cov_86.394191_g7232_i1	Anisakis	A0A0M3K5I0	46.4	56	1.35e-06	0.0308541525478576	6.07156	TrEMBL	A0A0M3K5I0_ANISI	NA	107	NA	ASIM_LOCUS15628	Anisakis simplex	Glycine N-acyltransferase-like protein
A0.A2.NODE_13477_length_383_cov_13218.593220_g12289_i0	Anisakis	A0A0M3J0F9	87.0	46	2.78e-16	0.0128725498076765	6.06352	TrEMBL	A0A0M3J0F9_ANISI	NA	210	NA	ASIM_LOCUS892	Anisakis simplex	Col_cuticle_N domain-containing protein
A0.A4.NODE_36951_length_246_cov_2.087805_g25296_i0	Anisakis	KHN73445.1	85.0	60	1.95e-26	0.00600036347332078	6.06174	Nr	KHN73445	Peroxidase mlt-7 [Toxocara canis]	569	INV	mlt-7	Toxocara canis	Peroxidase mlt-7
A2.transcripts:Locus_1_Transcript_5632_107551_Confidence_0.000_Length_1433	Anisakis	KHN81900.1	83.0	147	1.44e-88	0.0345654594559071	6.05241	Nr	KHN81900	putative GH family 25 lysozyme 4 [Toxocara canis]	214	INV	NA	Toxocara canis	putative GH family 25 lysozyme 4
A0.A1.NODE_33187_length_452_cov_0.994805_g19384_i0	Anisakis	A0A0M3J1M5	99.0	104	8.51e-66	0.00370860358746675	6.04856	TrEMBL	A0A0M3J1M5_ANISI	NA	325	NA	ASIM_LOCUS1307	Anisakis simplex	Neur_chan_LBD domain-containing protein
A1.A4.J2411161	Anisakis	A0A158PP20	100	77	9.75e-46	0.0229614099927281	6.04732	TrEMBL	A0A158PP20_ANISI	NA	332	NA	NA	Anisakis simplex	2-(3-amino-3-carboxypropyl)histidine synthase subunit 1
A2.transcripts:Locus_2552_Transcript_11_22_Confidence_0.464_Length_962	Anisakis	SBT54765.1	95.5	88	2.47e-44	0.013163881657104	6.04372	Nr	SBT54765	STP1 protein [Plasmodium ovale wallikeri]	753	INV	NA	Plasmodium ovale wallikeri	STP1 protein
A2.transcripts:Locus_1631_Transcript_2_5_Confidence_0.500_Length_419	Anisakis	A0A0M3IXY7	94.7	114	3.19e-63	0.0009364264364337	6.033	TrEMBL	A0A0M3IXY7_ANISI	NA	1107	NA	ASIM_LOCUS12	Anisakis simplex	Transcription initiation factor TFIID subunit 2
A2.transcripts:Locus_1_Transcript_24925_107551_Confidence_0.000_Length_5502	Anisakis	KHN86228.1	65.6	1016	0.0	0.0250092249973063	6.0311	Nr	KHN86228	Liprin-beta [Toxocara canis]	903	INV	T21H8.1	Toxocara canis	Liprin-beta
A0.A5.NODE_23823_length_1045_cov_12.546906_g10177_i0	Anisakis	KHN74579.1	53.5	286	1.07e-95	2.64268294436577e-06	6.02635	Nr	KHN74579	Putative serine protease K12H4.7, partial [Toxocara canis]	1094	INV	K12H4.7	Toxocara canis	putative serine protease K12H4.7
A0.A1.NODE_27698_length_662_cov_2.589916_g14113_i0	Anisakis	KHN81865.1	83.6	152	2.96e-87	3.87368751816812e-06	6.02044	Nr	KHN81865	Globin-like protein 9, partial [Toxocara canis]	243	INV	glb-9	Toxocara canis	Globin-like protein 9
A2.transcripts:Locus_34185_Transcript_11_22_Confidence_0.520_Length_629	Anisakis	XP_001901765.1	58.6	70	2.19e-09	0.0145559222330852	6.01555	Nr	XP_001901765	epicuticlin [Brugia malayi]	187	INV	NA	Brugia malayi	epicuticlin
A0.A5.NODE_31260_length_692_cov_10.394453_g14482_i0	Anisakis	CAR86709.1	64.0	86	1.82e-28	0.0101781869252932	6.00748	Nr	CAR86709	Conserved protein [Lactobacillus rhamnosus GG]	105	BCT	NA	Lactobacillus rhamnosus GG	Conserved protein
A0.A1.NODE_26988_length_699_cov_2.686709_g13515_i0	Anisakis	KHN87939.1	47.1	87	3.23e-15	1.05046518477407e-05	5.98883	Nr	KHN87939	Leucine-rich repeat protein 1 [Toxocara canis]	552	INV	LRR1	Toxocara canis	Leucine-rich repeat protein 1
A2.transcripts:Locus_3_Transcript_60723_70181_Confidence_0.000_Length_7891	Anisakis	A0A3P6RS42	99.5	604	3.25e-229	0.0155664871920719	5.98572	TrEMBL	A0A3P6RS42_ANISI	NA	604	NA	ASIM_LOCUS12073	Anisakis simplex	SRCR domain-containing protein
A1.A1.R3396133	Anisakis	A0A3P6N399	98.6	69	1.24e-41	0.00030037582957466	5.98487	TrEMBL	A0A3P6N399_ANISI	NA	180	NA	ASIM_LOCUS2037	Anisakis simplex	Metallophos domain-containing protein
A1.A0.R3468956	Anisakis	A0A0M3JGX8	93.4	61	1.31e-25	0.00714174032025866	5.97756	TrEMBL	A0A0M3JGX8_ANISI	NA	214	NA	ASIM_LOCUS6662	Anisakis simplex	HTH CENPB-type domain-containing protein
A2.transcripts:Locus_6261_Transcript_1_1_Confidence_0.000_Length_932	Anisakis	CRZ23531.1	53.4	58	8.20e-07	3.82076885740775e-11	5.97434	Nr	CRZ23531	Bm9274 [Brugia malayi]	244	INV	Bm9274	Brugia malayi	Bm9274
A2.transcripts:Locus_10318_Transcript_5_13_Confidence_0.312_Length_823	Anisakis	KHN78681.1	76.6	77	2.24e-28	0.0354353995926284	5.97124	Nr	KHN78681	Cell adhesion protein byn-1 [Toxocara canis]	511	INV	byn-1	Toxocara canis	Cell adhesion protein byn-1
A2.transcripts:Locus_5783_Transcript_1_4_Confidence_0.333_Length_1194	Anisakis	A0A0M3K1T9	96.7	183	4.94e-110	0.00168389777852217	5.96949	TrEMBL	A0A0M3K1T9_ANISI	NA	1314	NA	ASIM_LOCUS14256	Anisakis simplex	alpha-1,2-Mannosidase
A0.A2.NODE_2620_length_1174_cov_17.737991_g2197_i0	Anisakis	A0A183TXA4	75.6	262	4.67e-145	0.00196828364869911	5.9634	TrEMBL	A0A183TXA4_TOXCA	NA	267	NA	TCNE_LOCUS874	Toxocara canis	Alkaline ceramidase
A2.transcripts:Locus_2254_Transcript_36_84_Confidence_0.147_Length_1453	Anisakis	F1L6C7	66.5	254	1.11e-122	0.0207532794301321	5.95894	TrEMBL	F1L6C7_ASCSU	NA	421	NA	NA	Ascaris suum	N-acyl-L-amino-acid amidohydrolase
A2.transcripts:Locus_5186_Transcript_15_18_Confidence_0.136_Length_1050	Anisakis	A0A0B2VW50	80.5	118	2.15e-56	5.86225262348143e-11	5.95597	TrEMBL	A0A0B2VW50_TOXCA	NA	237	NA	SWEET10	Toxocara canis	Sugar transporter SWEET
A0.A2.NODE_5777_length_734_cov_49.276596_g4950_i0	Anisakis	SHT70305.1	79.2	101	6.82e-47	0.00197518347826411	5.95346	Nr	SHT70305	Uncharacterised protein [Mycobacteroides abscessus subsp. abscessus]	144	BCT	NA	Mycobacteroides abscessus subsp. abscessus	Uncharacterised protein
A2.transcripts:Locus_3992_Transcript_32_36_Confidence_0.390_Length_1922	Anisakis	A0A183UVD9	67.8	276	1.01e-134	0.0184782203452071	5.94966	TrEMBL	A0A183UVD9_TOXCA	Guanine insertion enzyme	355	NA	TCNE_LOCUS12459	Toxocara canis	Queuine tRNA-ribosyltransferase catalytic subunit 1
A2.transcripts:Locus_16608_Transcript_3_3_Confidence_0.167_Length_1433	Anisakis	A0A0M3IEF5	66.1	333	1.51e-150	8.73571465094239e-07	5.91627	TrEMBL	A0A0M3IEF5_ASCLU	NA	334	NA	NA	Ascaris lumbricoides	Hydrolase_4 domain-containing protein
A1.A1.J3304112	Anisakis	KHN73026.1	60.9	476	1.08e-164	0.0139411693566397	5.91615	Nr	KHN73026	Chondroadherin-like protein [Toxocara canis]	698	INV	CHADL	Toxocara canis	Chondroadherin-like protein
A2.transcripts:Locus_36138_Transcript_14_16_Confidence_0.280_Length_716	Anisakis	A0A0B2V3Y0	59.9	142	1.78e-60	0.0408854928020694	5.90929	TrEMBL	A0A0B2V3Y0_TOXCA	NA	335	NA	b3gnt5-b	Toxocara canis	Hexosyltransferase
A2.transcripts:Locus_1581_Transcript_40_40_Confidence_0.193_Length_2835	Anisakis	A0A0B2VK05	82.7	358	1.97e-194	0.0444554560919184	5.90595	TrEMBL	A0A0B2VK05_TOXCA	NA	1307	NA	RAD54L	Toxocara canis	Elongation factor Tu, mitochondrial
A2.transcripts:Locus_9223_Transcript_1_1_Confidence_0.000_Length_657	Anisakis	KHN88067.1	75.8	194	7.73e-89	0.0453166487716967	5.89964	Nr	KHN88067	Solute carrier family 23 member 2 [Toxocara canis]	555	INV	slc23a2	Toxocara canis	Solute carrier family 23 member 2
A2.transcripts:Locus_1_Transcript_31180_107551_Confidence_0.000_Length_2321	Anisakis	A0A0M3J2X1	80.3	198	1.02e-98	0.000108167128018376	5.8898	TrEMBL	A0A0M3J2X1_ANISI	NA	237	NA	ASIM_LOCUS1754	Anisakis simplex	Glucuronosyltransferase
A2.transcripts:Locus_4_Transcript_8573_21802_Confidence_0.001_Length_2030	Anisakis	A0A238BRW8	37.7	411	2.25e-58	0.0177542421818789	5.88457	TrEMBL	A0A238BRW8_9BILA	NA	370	NA	X798_04888	Onchocerca flexuosa	14_3_3 domain-containing protein
A0.A4.NODE_13762_length_1550_cov_1307.624917_g2909_i2	Anisakis	F1KWA1	66.4	378	2.27e-159	0.000266597430798731	5.8677	TrEMBL	F1KWA1_ASCSU	NA	535	NA	NA	Ascaris suum	Serine hydroxymethyltransferase
A0.A2.NODE_10074_length_485_cov_78.831140_g8924_i0	Anisakis	CDQ05680.1	38.0	92	1.94e-11	2.70759298674862e-08	5.85392	Nr	CDQ05680	Bm13379 [Brugia malayi]	111	INV	Bm13379	Brugia malayi	Bm13379
A0.A5.NODE_18929_length_1356_cov_9.391470_g8041_i0	Anisakis	KHN79843.1	77.6	183	1.13e-85	0.0187590544110912	5.84293	Nr	KHN79843	Tyramine receptor tyra-2 [Toxocara canis]	250	INV	tyra-2	Toxocara canis	Tyramine receptor tyra-2
A2.transcripts:Locus_919_Transcript_15_29_Confidence_0.389_Length_2158	Anisakis	AZA15223.1	97.7	473	0.0	1.09589631238694e-05	5.83561	Nr	AZA15223	peptide transporter family 1 [Anisakis simplex]	770	INV	pept-1	Anisakis simplex	peptide transporter family 1
A0.A4.NODE_13260_length_1609_cov_116.356505_g4161_i2	Anisakis	A0A0M3K2R5	74.1	147	5.39e-60	0.0379647606425803	5.82428	TrEMBL	A0A0M3K2R5_ANISI	NA	507	NA	ASIM_LOCUS14638	Anisakis simplex	Protein kinase domain-containing protein
A2.transcripts:Locus_20971_Transcript_1_1_Confidence_0.000_Length_440	Anisakis	A0A0M3J3D5	96.6	146	2.45e-99	3.4949006112327e-05	5.82114	TrEMBL	A0A0M3J3D5_ANISI	NA	232	NA	NA	Anisakis simplex	Protein kinase domain-containing protein
A2.transcripts:Locus_39278_Transcript_1_1_Confidence_0.000_Length_235	Anisakis	A0A0M3IYF0	85.7	28	3.65e-06	0.026488031548195	5.8179	TrEMBL	A0A0M3IYF0_ANISI	NA	393	NA	ASIM_LOCUS183	Anisakis simplex	Protein kinase domain-containing protein
A2.transcripts:Locus_1_Transcript_12847_107551_Confidence_0.000_Length_4529	Anisakis	A0A0M3JZR1	95.5	463	2.26e-309	0.026488031548195	5.8179	TrEMBL	A0A0M3JZR1_ANISI	NA	444	NA	ASIM_LOCUS13439	Anisakis simplex	Rab GDP dissociation inhibitor
A2.transcripts:Locus_3350_Transcript_46_113_Confidence_0.150_Length_1952	Anisakis	KHN86214.1	82.8	262	5.15e-137	0.0246552082649035	5.77623	Nr	KHN86214	Y+L amino acid transporter 2 [Toxocara canis]	552	INV	SLC7A6	Toxocara canis	Y+L amino acid transporter 2
A2.transcripts:Locus_279_Transcript_97_98_Confidence_0.049_Length_932	Anisakis	KHN87701.1	77.2	189	1.58e-80	0.0153309019212019	5.77542	Nr	KHN87701	Spindle- and centromere-associated protein [Toxocara canis]	624	INV	PUMA1	Toxocara canis	Spindle- and centromere-associated protein
A2.transcripts:Locus_1143_Transcript_54_109_Confidence_0.221_Length_1714	Anisakis	KHN87939.1	46.5	71	5.07e-08	0.0174231821898096	5.77485	Nr	KHN87939	Leucine-rich repeat protein 1 [Toxocara canis]	552	INV	LRR1	Toxocara canis	Leucine-rich repeat protein 1
A0.A2.NODE_5136_length_797_cov_92.175781_g4371_i0	Anisakis	A0A0B2V3Y0	69.5	82	6.36e-34	7.969305323085e-05	5.77068	TrEMBL	A0A0B2V3Y0_TOXCA	NA	335	NA	b3gnt5-b	Toxocara canis	Hexosyltransferase
A2.transcripts:Locus_12353_Transcript_7_11_Confidence_0.500_Length_1421	Anisakis	KHN76106.1	71.7	219	1.20e-109	0.0299381777014258	5.77028	Nr	KHN76106	SEC14-like protein 2 [Toxocara canis]	395	INV	SEC14L2	Toxocara canis	SEC14-like protein 2
A0.A2.NODE_911_length_1807_cov_517.949944_g746_i0	Anisakis	KHN83982.1	63.4	465	2.14e-170	0.00711113627808465	5.7645	Nr	KHN83982	Collagen alpha-1(XII) chain [Toxocara canis]	582	INV	COL12A1	Toxocara canis	Collagen alpha-1(XII) chain
A0.A5.NODE_38833_length_468_cov_2.955294_g20875_i0	Anisakis	A0A0M3K5I0	37.2	94	1.38e-08	0.00272698287023799	5.76353	TrEMBL	A0A0M3K5I0_ANISI	NA	107	NA	ASIM_LOCUS15628	Anisakis simplex	Glycine N-acyltransferase-like protein
A0.A1.NODE_18183_length_1344_cov_24.178543_g8263_i0	Anisakis	A0A0B2VW50	76.5	221	3.76e-114	3.20414314071715e-11	5.75785	TrEMBL	A0A0B2VW50_TOXCA	NA	237	NA	SWEET10	Toxocara canis	Sugar transporter SWEET
A2.transcripts:Locus_15788_Transcript_3_6_Confidence_0.583_Length_971	Anisakis	KHN74504.1	36.4	110	1.40e-10	0.000116793137213228	5.74776	Nr	KHN74504	Platelet endothelial aggregation receptor 1 [Toxocara canis]	410	INV	PEAR1	Toxocara canis	Platelet endothelial aggregation receptor 1
A2.transcripts:Locus_5_Transcript_5_15_Confidence_0.647_Length_1352	Anisakis	A0A0M3KGD5	100	119	8.50e-73	1.91902326532583e-12	5.73379	TrEMBL	A0A0M3KGD5_ANISI	NA	238	NA	ASIM_LOCUS19433	Anisakis simplex	Col_cuticle_N domain-containing protein
A0.A2.NODE_3295_length_1039_cov_4689.501980_g2793_i0	Anisakis	A0A0M3J0F9	91.2	34	7.27e-10	0.0178051643411122	5.72984	TrEMBL	A0A0M3J0F9_ANISI	NA	210	NA	ASIM_LOCUS892	Anisakis simplex	Col_cuticle_N domain-containing protein
A2.transcripts:Locus_536_Transcript_7_68_Confidence_0.196_Length_1141	Anisakis	XP_001895114.1	58.5	123	1.96e-43	0.0430238206942151	5.72872	Nr	XP_001895114	DB module family protein [Brugia malayi]	270	INV	NA	Brugia malayi	DB module family protein
A2.transcripts:Locus_1375_Transcript_1_22_Confidence_0.034_Length_365	Anisakis	KHN82773.1	81.6	38	1.49e-12	0.0401645011326391	5.70744	Nr	KHN82773	Endoplasmic reticulum-Golgi intermediate compartment protein 3 [Toxocara canis]	382	INV	ergic3	Toxocara canis	Endoplasmic reticulum-Golgi intermediate compartment protein 3
A0.A2.NODE_16577_length_323_cov_9.799320_g15389_i0	Anisakis	A0A0M3K6Z7	98.1	106	1.45e-63	0.00929708936553963	5.70192	TrEMBL	A0A0M3K6Z7_ANISI	NA	310	NA	ASIM_LOCUS16145	Anisakis simplex	GLOBIN domain-containing protein
A0.A4.NODE_12182_length_1745_cov_21.430751_g6022_i0	Anisakis	KHN81970.1	35.2	375	5.85e-49	8.80788743903031e-05	5.69172	Nr	KHN81970	Major facilitator superfamily domain-containing protein 8 [Toxocara canis]	543	INV	mfsd8	Toxocara canis	Major facilitator superfamily domain-containing protein 8
A1.A6.R986313	Anisakis	A0A0M3I2K1	33.4	287	1.20e-36	1.94933545106655e-08	5.68957	TrEMBL	A0A0M3I2K1_ASCLU	NA	290	NA	NA	Ascaris lumbricoides	Glycine N-acyltransferase-like protein
A0.A2.NODE_1160_length_1655_cov_2059.933579_g948_i0	Anisakis	A0A0M3HWZ4	91.0	100	9.52e-32	4.7029769033218e-05	5.68803	TrEMBL	A0A0M3HWZ4_ASCLU	NA	283	NA	NA	Ascaris lumbricoides	Col_cuticle_N domain-containing protein
A0.A5.NODE_20116_length_1277_cov_10.676661_g8522_i0	Anisakis	A0A0B2VW50	76.5	221	8.89e-115	0.00130725878650387	5.66144	TrEMBL	A0A0B2VW50_TOXCA	NA	237	NA	SWEET10	Toxocara canis	Sugar transporter SWEET
A2.transcripts:Locus_3_Transcript_37657_70181_Confidence_0.000_Length_2309	Anisakis	KHN80644.1	62.2	444	5.90e-188	0.00903221010574919	5.65817	Nr	KHN80644	Vesicular glutamate transporter 2 [Toxocara canis]	495	INV	SLC17A6	Toxocara canis	Vesicular glutamate transporter 2
A0.A4.NODE_8401_length_2295_cov_38.505768_g575_i1	Anisakis	CTP81479.1	61.1	566	1.03e-230	0.00573540083368061	5.6478	Nr	CTP81479	BMA-EMB-4 [Brugia malayi]	1440	INV	Bma-emb-4	Brugia malayi	BMA-EMB-4
A2.transcripts:Locus_1_Transcript_15706_107551_Confidence_0.000_Length_1137	Anisakis	F1KW39	89.8	157	4.38e-90	0.0229419065470005	5.64289	TrEMBL	F1KW39_ASCSU	NA	723	NA	NA	Ascaris suum	Protein kinase C
A2.transcripts:Locus_1706_Transcript_5_6_Confidence_0.556_Length_1034	Anisakis	KHN80321.1	69.0	329	1.04e-37	0.000536141130293844	5.63817	Nr	KHN80321	Cuticle collagen 40 [Toxocara canis]	346	INV	col-40	Toxocara canis	Cuticle collagen 40
A0.A2.NODE_5552_length_756_cov_6.514443_g4748_i0	Anisakis	A0A0N5ATM7	68.8	141	4.29e-52	0.00673443951389161	5.63405	TrEMBL	A0A0N5ATM7_9BILA	NA	186	NA	NA	Syphacia muris	BHLH domain-containing protein
A2.transcripts:Locus_21425_Transcript_1_1_Confidence_0.000_Length_1299	Anisakis	A0A1I7XM30	59.5	158	6.44e-63	0.00205797936792443	5.63015	TrEMBL	A0A1I7XM30_HETBA	NA	323	NA	NA	Heterorhabditis bacteriophora	RRP15-like protein
A0.A5.NODE_34198_length_591_cov_8.737226_g16776_i0	Anisakis	CDQ05680.1	36.0	114	2.30e-11	8.35976343671772e-05	5.61933	Nr	CDQ05680	Bm13379 [Brugia malayi]	111	INV	Bm13379	Brugia malayi	Bm13379
A1.A2.R682419	Anisakis	A0A0M3JZN3	98.0	346	2.54e-241	0.000650040435983754	5.6161	TrEMBL	A0A0M3JZN3_ANISI	NA	340	NA	ASIM_LOCUS13406	Anisakis simplex	ZP domain-containing protein
A0.A5.NODE_34734_length_575_cov_3.415414_g17230_i0	Anisakis	A0A0M3JZN3	100	37	4.00e-14	0.00757710103691053	5.61014	TrEMBL	A0A0M3JZN3_ANISI	NA	340	NA	ASIM_LOCUS13406	Anisakis simplex	ZP domain-containing protein
A0.A2.NODE_2075_length_1320_cov_17.400465_g1733_i0	Anisakis	CRZ23473.1	28.3	407	6.83e-27	0.0211371191488924	5.60899	Nr	CRZ23473	Bm1803 [Brugia malayi]	543	INV	Bm1803	Brugia malayi	Bm1803
A0.A5.NODE_31319_length_690_cov_3.585781_g14518_i0	Anisakis	KHN78009.1	64.9	111	2.36e-35	0.036999088209369	5.60492	Nr	KHN78009	ADAM family mig-17 [Toxocara canis]	453	INV	mig-17	Toxocara canis	ADAM family mig-17
A2.transcripts:Locus_1_Transcript_29014_107551_Confidence_0.000_Length_320	Anisakis	KFX40676.1	95.6	45	1.77e-20	0.042870619905703	5.57809	Nr	KFX40676	Ornithine carbamoyltransferase, partial [Talaromyces marneffei PM1]	44	PLN	NA	Talaromyces marneffei PM1	Ornithine carbamoyltransferase
A2.transcripts:Locus_19284_Transcript_1_3_Confidence_0.333_Length_966	Anisakis	CDJ96568.1	49.3	211	3.50e-68	0.00503491946043626	5.57778	Nr	CDJ96568	Protein C39E9.8, isoform d [Haemonchus contortus]	238	INV	NA	Haemonchus contortus	Protein C39E9.8, isoform d
A2.transcripts:Locus_2586_Transcript_6_6_Confidence_0.286_Length_1204	Anisakis	A0A0M3JZN3	97.1	243	2.61e-160	2.38750151737792e-07	5.56451	TrEMBL	A0A0M3JZN3_ANISI	NA	340	NA	ASIM_LOCUS13406	Anisakis simplex	ZP domain-containing protein
A0.A0.NODE_12364_length_1388_cov_153.274569_g3986_i1	Anisakis	A0A0M3K252	98.0	252	3.41e-48	0.0205147901665271	5.55223	TrEMBL	A0A0M3K252_ANISI	NA	293	NA	ASIM_LOCUS14388	Anisakis simplex	Col_cuticle_N domain-containing protein
A0.A2.NODE_2827_length_1123_cov_211.441499_g2375_i0	Anisakis	A0A0M3JZN3	80.8	229	3.65e-124	0.00439450690088319	5.53424	TrEMBL	A0A0M3JZN3_ANISI	NA	340	NA	ASIM_LOCUS13406	Anisakis simplex	ZP domain-containing protein
A2.transcripts:Locus_46679_Transcript_1_1_Confidence_0.000_Length_535	Anisakis	A0A0B2V4A9	51.6	186	9.59e-47	4.02530545825865e-05	5.51889	TrEMBL	A0A0B2V4A9_TOXCA	NA	218	NA	nas-14	Toxocara canis	Metalloendopeptidase
A2.transcripts:Locus_1_Transcript_4416_107551_Confidence_0.000_Length_7337	Anisakis	KHN77544.1	49.4	963	4.54e-296	0.0444189186578856	5.51586	Nr	KHN77544	Putative serine protease F56F10.1 [Toxocara canis]	986	INV	F56F10.1	Toxocara canis	putative serine protease F56F10.1
A2.transcripts:Locus_1317_Transcript_15_15_Confidence_0.143_Length_920	Anisakis	A0A0M3K555	99.5	202	4.02e-08	7.84590503332413e-43	5.50498	TrEMBL	A0A0M3K555_ANISI	NA	292	NA	ASIM_LOCUS15503	Anisakis simplex	Col_cuticle_N domain-containing protein
A0.A5.NODE_28108_length_821_cov_19.508997_g8089_i4	Anisakis	A0A0M3KCI3	66.9	293	3.10e-122	0.0463145735299646	5.49788	TrEMBL	A0A0M3KCI3_ANISI	NA	274	NA	ASIM_LOCUS18081	Anisakis simplex	DB domain-containing protein
A2.transcripts:Locus_1_Transcript_28999_107551_Confidence_0.001_Length_12012	Anisakis	KRZ05645.1	65.8	269	7.78e-98	0.0222172112843238	5.49244	Nr	KRZ05645	Regulator of rDNA transcription protein 15 [Trichinella pseudospiralis]	277	INV	RRT15	Trichinella pseudospiralis	Regulator of rDNA transcription protein 15
A1.A2.R684084	Anisakis	A0A4U8V1I1	59.6	47	4.96e-10	0.00285205455574132	5.487	TrEMBL	A0A4U8V1I1_STECR	NA	539	NA	L596_005099	Steinernema carpocapsae	Glutamate dehydrogenase
A2.transcripts:Locus_3962_Transcript_21_43_Confidence_0.281_Length_1397	Anisakis	A0A0M3K4N2	44.0	150	6.79e-28	0.0276978231740736	5.48511	TrEMBL	A0A0M3K4N2_ANISI	NA	1553	NA	ASIM_LOCUS15330	Anisakis simplex	P-type domain-containing protein
A2.transcripts:Locus_27_Transcript_8_15_Confidence_0.235_Length_1119	Anisakis	KHN80321.1	78.1	73	2.10e-24	0.00573714565482051	5.48064	Nr	KHN80321	Cuticle collagen 40 [Toxocara canis]	346	INV	col-40	Toxocara canis	Cuticle collagen 40
A1.A0.S1341157	Anisakis	KHN72957.1	91.9	37	1.51e-15	0.0411963029786414	5.47022	Nr	KHN72957	Gamma-aminobutyric acid receptor subunit beta [Toxocara canis]	547	INV	gab-1	Toxocara canis	Gamma-aminobutyric acid receptor subunit beta
A0.A2.NODE_12904_length_397_cov_12.809783_g11716_i0	Anisakis	A0A158PPR0	100	87	1.21e-57	1.03965553093021e-05	5.46918	TrEMBL	A0A158PPR0_ANISI	NA	289	NA	ASIM_LOCUS14701	Anisakis simplex	Metalloendopeptidase
A2.transcripts:Locus_5_Transcript_15_15_Confidence_0.176_Length_1262	Anisakis	A0A0M3KGD5	100	119	1.78e-73	4.26510477717281e-06	5.46785	TrEMBL	A0A0M3KGD5_ANISI	NA	238	NA	ASIM_LOCUS19433	Anisakis simplex	Col_cuticle_N domain-containing protein
A0.A5.NODE_31066_length_700_cov_6.494673_g14348_i0	Anisakis	EAW94056.1	67.3	162	1.89e-61	0.0287034508496867	5.45854	Nr	EAW94056	hCG1780097 [Homo sapiens]	154	PRI	NA	Homo sapiens	hCG1780097
A0.A1.NODE_31563_length_500_cov_2.515012_g17774_i0	Anisakis	KHN87939.1	48.6	72	1.01e-13	0.00067856305014943	5.44793	Nr	KHN87939	Leucine-rich repeat protein 1 [Toxocara canis]	552	INV	LRR1	Toxocara canis	Leucine-rich repeat protein 1
A2.transcripts:Locus_41049_Transcript_1_2_Confidence_0.667_Length_725	Anisakis	KHN74592.1	53.9	232	2.40e-70	0.000644297834132611	5.44373	Nr	KHN74592	Putative serine protease K12H4.7, partial [Toxocara canis]	1661	INV	K12H4.7	Toxocara canis	putative serine protease K12H4.7
A2.transcripts:Locus_1_Transcript_2635_107551_Confidence_0.000_Length_1851	Anisakis	KHN81970.1	51.0	367	4.84e-113	0.0387214383857942	5.44318	Nr	KHN81970	Major facilitator superfamily domain-containing protein 8 [Toxocara canis]	543	INV	mfsd8	Toxocara canis	Major facilitator superfamily domain-containing protein 8
A0.A1.NODE_5082_length_3159_cov_2273.579884_g2601_i0	Anisakis	A0A0B2VDS3	42.8	243	1.82e-45	0.0334970893776436	5.43076	TrEMBL	A0A0B2VDS3_TOXCA	NA	134	NA	R07E5.13	Toxocara canis	Mitochondrial pyruvate carrier
A2.transcripts:Locus_207_Transcript_19_29_Confidence_0.083_Length_1271	Anisakis	KHN83347.1	77.6	241	8.73e-122	5.62923391168387e-06	5.42098	Nr	KHN83347	Protein eyes shut [Toxocara canis]	600	INV	eys	Toxocara canis	Protein eyes shut
A2.transcripts:Locus_31901_Transcript_1_1_Confidence_0.000_Length_244	Anisakis	YP_009337814.1	67.9	81	4.22e-30	0.0354353995926284	5.41721	Nr	YP_009337814	putative glycoprotein [Hubei rhabdo-like virus 9]	623	VRL	NA	Hubei rhabdo-like virus 9	putative glycoprotein
A2.transcripts:Locus_3_Transcript_55572_70181_Confidence_0.000_Length_1262	Anisakis	A0A0M3K555	100	47	1.90e-22	4.804923554662e-15	5.41485	TrEMBL	A0A0M3K555_ANISI	NA	292	NA	ASIM_LOCUS15503	Anisakis simplex	Col_cuticle_N domain-containing protein
A0.A0.NODE_10626_length_1605_cov_19.416129_g2546_i6	Anisakis	CDW75723.1	45.5	409	2.10e-68	0.0279932727250436	5.39952	Nr	CDW75723	UNKNOWN [Stylonychia lemnae]	1881	INV	Contig11071.g11842	Stylonychia lemnae	UNKNOWN
A0.A1.NODE_12024_length_1981_cov_275.933647_g5620_i0	Anisakis	A0A0M3HZL9	89.5	237	7.93e-140	0.0315339135880323	5.39393	TrEMBL	A0A0M3HZL9_ASCLU	NA	429	NA	NA	Ascaris lumbricoides	S5 DRBM domain-containing protein
A0.A4.NODE_21250_length_810_cov_59.968791_g4249_i3	Anisakis	KHN82102.1	57.8	90	2.00e-19	4.87149076580029e-05	5.39284	Nr	KHN82102	Paternally-expressed protein [Toxocara canis]	3286	INV	PEG3	Toxocara canis	Paternally-expressed protein
A0.A2.NODE_4457_length_874_cov_15.431953_g3781_i0	Anisakis	KHN87611.1	59.8	264	5.62e-115	0.0195944171553247	5.39028	Nr	KHN87611	CRAL-TRIO domain-containing protein F28H7.8 [Toxocara canis]	397	INV	F28H7.8	Toxocara canis	CRAL-TRIO domain-containing protein F28H7.8
A2.transcripts:Locus_17865_Transcript_1_1_Confidence_0.000_Length_232	Anisakis	XP_001892764.1	65.5	58	2.52e-21	0.000841691878109737	5.38293	Nr	XP_001892764	putative 18.4 kDa protein T05H10.3 in chromosome II precursor, putative [Brugia malayi]	160	INV	Bm363	Brugia malayi	putative 18.4 kDa protein T05H10.3 in chromosome II precursor, putative
A0.A5.NODE_21357_length_1196_cov_7.179532_g9043_i0	Anisakis	A0A0M3I2K1	33.2	247	8.23e-27	0.034589437427774	5.37994	TrEMBL	A0A0M3I2K1_ASCLU	NA	290	NA	NA	Ascaris lumbricoides	Glycine N-acyltransferase-like protein
A2.transcripts:Locus_2663_Transcript_20_29_Confidence_0.133_Length_829	Anisakis	A0A183V7A6	89.6	67	1.31e-32	0.0130111268641391	5.37781	TrEMBL	A0A183V7A6_TOXCA	tRNA guanosine-2'-O-methyltransferase TRM11 homolog	262	NA	TCNE_LOCUS16626	Toxocara canis	tRNA (guanine(10)-N2)-methyltransferase homolog
A2.transcripts:Locus_3088_Transcript_38_196_Confidence_0.077_Length_1393	Anisakis	A0A0M3K555	100	48	6.39e-23	2.14410265257635e-10	5.36843	TrEMBL	A0A0M3K555_ANISI	NA	292	NA	ASIM_LOCUS15503	Anisakis simplex	Col_cuticle_N domain-containing protein
A2.transcripts:Locus_3007_Transcript_35_46_Confidence_0.014_Length_431	Anisakis	A0A0M3J3D5	67.2	67	1.51e-13	8.96457079698329e-07	5.36759	TrEMBL	A0A0M3J3D5_ANISI	NA	232	NA	NA	Anisakis simplex	Protein kinase domain-containing protein
A0.A5.NODE_32602_length_643_cov_336.671667_g3411_i3	Anisakis	A0A0M3JYW9	100	62	5.67e-29	0.0121311442652302	5.35566	TrEMBL	A0A0M3JYW9_ANISI	NA	403	NA	ASIM_LOCUS13091	Anisakis simplex	Fructose-bisphosphate aldolase
A0.A4.NODE_4897_length_3032_cov_361.739552_g183_i3	Anisakis	KHN77544.1	70.8	298	2.77e-143	2.83768877090595e-06	5.33989	Nr	KHN77544	Putative serine protease F56F10.1 [Toxocara canis]	986	INV	F56F10.1	Toxocara canis	putative serine protease F56F10.1
A0.A0.NODE_23424_length_528_cov_5.932347_g15148_i0	Anisakis	MBO6522454.1	73.8	42	1.09e-09	0.00439634838403434	5.33878	Nr	MBO6522454	MAG: PD40 domain-containing protein [Balneolaceae bacterium]	363	ENV	NA	Balneolaceae bacterium	PD40 domain-containing protein
A2.transcripts:Locus_122_Transcript_57_104_Confidence_0.181_Length_1041	Anisakis	KHN74592.1	61.2	294	3.99e-114	0.00014045019357726	5.33578	Nr	KHN74592	Putative serine protease K12H4.7, partial [Toxocara canis]	1661	INV	K12H4.7	Toxocara canis	putative serine protease K12H4.7
A2.transcripts:Locus_9317_Transcript_12_15_Confidence_0.250_Length_263	Anisakis	A0A7E4ZTF0	60.5	38	1.74e-06	0.0139164347098212	5.33231	TrEMBL	A0A7E4ZTF0_PANRE	NA	162	NA	NA	Panagrellus redivivus	SCP domain-containing protein
A0.A1.NODE_14202_length_1734_cov_487.079784_g4820_i1	Anisakis	A0A0M3JW11	75.7	226	1.24e-105	0.0359941824973895	5.33021	TrEMBL	A0A0M3JW11_ANISI	NA	174	NA	ASIM_LOCUS11910	Anisakis simplex	FABP domain-containing protein
A0.A1.NODE_22260_length_1015_cov_308.402954_g4622_i2	Anisakis	KHN85432.1	66.1	168	6.17e-46	0.0135261339979529	5.33008	Nr	KHN85432	EF-hand domain-containing protein D1 [Toxocara canis]	238	INV	EFHD1	Toxocara canis	EF-hand domain-containing protein D1
A0.A5.NODE_25889_length_929_cov_28.465011_g11217_i0	Anisakis	A0A0M3J262	100	191	2.62e-143	0.0426510762536923	5.31831	TrEMBL	A0A0M3J262_ANISI	NA	191	NA	ASIM_LOCUS1493	Anisakis simplex	DB domain-containing protein
A2.transcripts:Locus_1121_Transcript_2_21_Confidence_0.031_Length_798	Anisakis	VIO96900.1	67.7	96	2.64e-32	0.00017497859472555	5.29487	Nr	VIO96900	cuticlin 1 precursor, putative [Brugia malayi]	408	INV	Bma-cutl-14	Brugia malayi	cuticlin 1 precursor, putative
A2.transcripts:Locus_6616_Transcript_5_7_Confidence_0.519_Length_843	Anisakis	A0A0M3KI08	77.5	111	1.56e-44	0.0251019563316193	5.29248	TrEMBL	A0A0M3KI08_ANISI	NA	204	NA	ASIM_LOCUS20007	Anisakis simplex	VWFA domain-containing protein
A1.A2.J716817	Anisakis	A0A0B2UVA8	58.9	95	8.26e-28	0.0402257992285612	5.2849	TrEMBL	A0A0B2UVA8_TOXCA	NA	1374	NA	Tcan_18251	Toxocara canis	VWFA domain-containing protein
A2.transcripts:Locus_1863_Transcript_1_2_Confidence_0.333_Length_888	Anisakis	XP_024503527.1	79.1	43	4.50e-12	0.000932153571189107	5.27609	Nr	XP_024503527	Transmembrane protein 41A [Strongyloides ratti]	235	INV	NA	Strongyloides ratti	Transmembrane protein 41A
A0.A2.NODE_60348_length_114_cov_28.270588_g59160_i0	Anisakis	G5ECS8.1	73.7	38	1.09e-16	0.00952042768649084	5.26458	Swiss-Prot	ADT1_CAEEL	RecName: Full=A disintegrin and metalloproteinase with thrombospondin motifs adt-1; Short=ADAMTS adt-1; Flags: Precursor	1461	INV	NA	Caenorhabditis elegans	A disintegrin and metalloproteinase with thrombospondin motifs adt-1
A0.A2.NODE_2247_length_1271_cov_434.900966_g1877_i0	Anisakis	KHN88251.1	62.6	356	2.38e-153	4.94233826992649e-05	5.25251	Nr	KHN88251	Methyltransferase-like protein 13 [Toxocara canis]	365	INV	METTL13	Toxocara canis	Methyltransferase-like protein 13
A2.transcripts:Locus_11562_Transcript_2_4_Confidence_0.625_Length_1223	Anisakis	KHN79206.1	71.0	138	2.24e-58	0.0123765306210106	5.24654	Nr	KHN79206	Cuticlin-1, partial [Toxocara canis]	342	INV	cut-1	Toxocara canis	Cuticlin-1
A0.A4.NODE_13897_length_1534_cov_68.450770_g6762_i0	Anisakis	KHN79273.1	43.7	126	4.39e-25	3.99451707264867e-07	5.22769	Nr	KHN79273	Prostatic acid phosphatase [Toxocara canis]	745	INV	ACPP	Toxocara canis	Prostatic acid phosphatase
A0.A2.NODE_10085_length_485_cov_26.688596_g8935_i0	Anisakis	K7F154	67.1	73	2.77e-23	0.0240326988923859	5.2266	TrEMBL	K7F154_PELSI	NA	303	NA	NA	Pelodiscus sinensis	Reverse transcriptase domain-containing protein
A0.A5.NODE_30338_length_729_cov_5.539359_g13859_i0	Anisakis	A0A0M3J1B8	93.4	197	1.38e-124	0.0293195971870265	5.22491	TrEMBL	A0A0M3J1B8_ANISI	NA	274	NA	ASIM_LOCUS1201	Anisakis simplex	BTB domain-containing protein
A0.A5.NODE_22333_length_1133_cov_95.583486_g9481_i0	Anisakis	KHN85630.1	63.5	192	4.20e-82	0.00468410327281138	5.22466	Nr	KHN85630	RWD domain-containing protein 4 [Toxocara canis]	192	INV	RWDD4	Toxocara canis	RWD domain-containing protein 4
A2.transcripts:Locus_3_Transcript_20598_70181_Confidence_0.002_Length_8420	Anisakis	A0A0M3HS13	25.8	465	1.44e-33	4.76289355043597e-10	5.22427	TrEMBL	A0A0M3HS13_ASCLU	NA	1381	NA	NA	Ascaris lumbricoides	CCHC-type domain-containing protein
A0.A5.NODE_34147_length_592_cov_56.879781_g16734_i0	Anisakis	BAC00499.1	44.1	68	9.26e-09	0.00738721283754601	5.21963	Nr	BAC00499	ASABF-delta [Ascaris suum]	80	INV	NA	Ascaris suum	ASABF-delta
A0.A1.NODE_11955_length_1990_cov_4.100884_g5593_i0	Anisakis	KHN73557.1	81.5	275	1.43e-142	0.0432122313667154	5.1941	Nr	KHN73557	Proton myo-inositol cotransporter [Toxocara canis]	529	INV	SLC2A13	Toxocara canis	Proton myo-inositol cotransporter
A0.A2.NODE_22944_length_249_cov_9.027273_g21756_i0	Anisakis	A0A158PPR0	100	83	1.80e-52	0.00609360639336676	5.19224	TrEMBL	A0A158PPR0_ANISI	NA	289	NA	ASIM_LOCUS14701	Anisakis simplex	Metalloendopeptidase
A1.A1.S2326107	Anisakis	XP_001900417.1	86.5	111	5.39e-58	0.0391992659371014	5.19048	Nr	XP_001900417	Twik (KCNK-like) family of potassium channels, alpha subunit 7 [Brugia malayi]	525	INV	NA	Brugia malayi	Twik (KCNK-like) family of potassium channels, alpha subunit 7
A0.A5.NODE_21884_length_1162_cov_12.035746_g8769_i1	Anisakis	A0A0M3IZM4	97.6	124	6.37e-75	0.0439978744865207	5.18828	TrEMBL	A0A0M3IZM4_ANISI	NA	663	NA	ASIM_LOCUS607	Anisakis simplex	Carboxypeptidase
A2.transcripts:Locus_252_Transcript_255_293_Confidence_0.060_Length_400	Anisakis	A0A0M3I2K1	31.5	92	4.47e-07	0.0117921342656193	5.18242	TrEMBL	A0A0M3I2K1_ASCLU	NA	290	NA	NA	Ascaris lumbricoides	Glycine N-acyltransferase-like protein
A1.A1.R3391675	Anisakis	A0A0M3IDT5	55.3	219	5.56e-68	0.048278374389609	5.17704	TrEMBL	A0A0M3IDT5_ASCLU	NA	290	NA	NA	Ascaris lumbricoides	Paired domain-containing protein
A2.transcripts:Locus_1206_Transcript_1_25_Confidence_0.190_Length_728	Anisakis	KHN89098.1	70.5	146	1.54e-55	0.0443191916409458	5.17562	Nr	KHN89098	Transmembrane protein -like protein [Toxocara canis]	570	INV	NA	Toxocara canis	Transmembrane protein -like protein
A0.A2.NODE_1256_length_1613_cov_88.345328_g1030_i0	Anisakis	XP_024498982.1	70.7	174	6.41e-82	1.72527498989058e-09	5.17337	Nr	XP_024498982	Lipase EstA/Esterase EstB family-containing protein [Strongyloides ratti]	301	INV	NA	Strongyloides ratti	Lipase EstA/Esterase EstB family-containing protein
A0.A2.NODE_3343_length_1029_cov_46.304000_g2838_i0	Anisakis	CDJ90334.1	30.7	179	1.07e-15	8.83055902719974e-06	5.14298	Nr	CDJ90334	Protein MLT-9, isoform a [Haemonchus contortus]	596	INV	NA	Haemonchus contortus	Protein MLT-9, isoform a
A0.A5.NODE_3850_length_3335_cov_333.842345_g1901_i0	Anisakis	KHN85848.1	43.8	233	5.92e-46	0.0473550042007985	5.14046	Nr	KHN85848	Hemicentin-1 [Toxocara canis]	1056	INV	HMCN1	Toxocara canis	Hemicentin-1
A0.A2.NODE_373_length_2423_cov_3508.845447_g299_i0	Anisakis	A0A0B2VXG2	82.7	503	2.79e-310	0.000425812738953929	5.13197	TrEMBL	A0A0B2VXG2_TOXCA	NA	503	NA	Gdh	Toxocara canis	Glutamate dehydrogenase
A1.A1.R3329902	Anisakis	A0A158PPG1	94.2	343	2.73e-102	0.0217538811575093	5.11606	TrEMBL	A0A158PPG1_ANISI	NA	340	NA	ASIM_LOCUS13953	Anisakis simplex	Col_cuticle_N domain-containing protein
A0.A1.NODE_8560_length_2453_cov_97.110645_g4143_i0	Anisakis	A0A1I8EZQ2	21.3	314	1.02e-10	1.43990486353091e-06	5.11354	TrEMBL	A0A1I8EZQ2_WUCBA	NA	310	NA	NA	Wuchereria bancrofti	Glycine N-acyltransferase-like protein
A0.A4.NODE_10092_length_2028_cov_91.644187_g5049_i0	Anisakis	KHN79155.1	72.6	226	1.54e-113	0.0152979329452072	5.10961	Nr	KHN79155	Caffeoyl-CoA O-methyltransferase 2 [Toxocara canis]	226	INV	CCOAOMT2	Toxocara canis	Caffeoyl-CoA O-methyltransferase 2
A0.A5.NODE_22324_length_1134_cov_7.255729_g9477_i0	Anisakis	KHN79273.1	45.4	196	2.66e-52	0.0273332404291218	5.10278	Nr	KHN79273	Prostatic acid phosphatase [Toxocara canis]	745	INV	ACPP	Toxocara canis	Prostatic acid phosphatase
A2.transcripts:Locus_3785_Transcript_16_177_Confidence_0.032_Length_872	Anisakis	EFF91372.1	86.9	122	4.04e-62	0.0294554650928753	5.10107	Nr	EFF91372	cell wall-associated hydrolase [Streptomyces sp. e14]	122	BCT	NA	Streptomyces sp. e14	cell wall-associated hydrolase
A2.transcripts:Locus_4_Transcript_320_510_Confidence_0.015_Length_1407	Anisakis	A0A0M3K555	100	146	2.34e-67	8.60227057784162e-10	5.09265	TrEMBL	A0A0M3K555_ANISI	NA	292	NA	ASIM_LOCUS15503	Anisakis simplex	Col_cuticle_N domain-containing protein
A0.A1.NODE_17160_length_1436_cov_10.410519_g7807_i0	Anisakis	A0A0B2VW50	79.3	92	4.07e-39	3.25443219071069e-08	5.0899	TrEMBL	A0A0B2VW50_TOXCA	NA	237	NA	SWEET10	Toxocara canis	Sugar transporter SWEET
A2.transcripts:Locus_3_Transcript_41704_70181_Confidence_0.000_Length_2669	Anisakis	A0A0M3I474	79.9	349	2.60e-168	0.0334900576076084	5.06627	TrEMBL	A0A0M3I474_ASCLU	NA	356	NA	NA	Ascaris lumbricoides	FIP-RBD domain-containing protein
A0.A1.NODE_17278_length_1425_cov_91.893225_g7859_i0	Anisakis	CDJ84116.1	41.4	215	3.24e-46	1.18109826203787e-05	5.06192	Nr	CDJ84116	Protein C17F4.7 [Haemonchus contortus]	185	INV	NA	Haemonchus contortus	Protein C17F4.7
A2.transcripts:Locus_4766_Transcript_20_20_Confidence_0.255_Length_1418	Anisakis	F1L2P6	36.2	500	9.48e-103	4.43344085377775e-08	5.04684	TrEMBL	F1L2P6_ASCSU	NA	543	NA	NA	Ascaris suum	Carboxypeptidase
A0.A2.NODE_206_length_2858_cov_275.102156_g157_i1	Anisakis	XP_001895114.1	61.7	115	2.40e-40	0.000397956556049559	5.03435	Nr	XP_001895114	DB module family protein [Brugia malayi]	270	INV	NA	Brugia malayi	DB module family protein
A1.A0.S2074075	Anisakis	A0A498SQQ8	61.1	167	7.45e-61	0.027604252243977	5.03209	TrEMBL	A0A498SQQ8_ACAVI	NA	209	NA	NAV_LOCUS8255	Acanthocheilonema viteae	Ig-like domain-containing protein
A0.A1.NODE_27069_length_693_cov_231.522364_g5670_i3	Anisakis	A0A0M3IFU0	80.9	89	2.48e-38	0.0096027792858596	5.02421	TrEMBL	A0A0M3IFU0_ASCLU	NA	280	NA	NA	Ascaris lumbricoides	Glutamate dehydrogenase (NAD(P)(+))
A2.transcripts:Locus_576_Transcript_30_31_Confidence_0.231_Length_1652	Anisakis	KHN82296.1	81.5	405	6.41e-234	0.00320072469246881	5.01346	Nr	KHN82296	Putative 28S ribosomal protein S5, mitochondrial [Toxocara canis]	434	INV	mrps-5	Toxocara canis	putative 28S ribosomal protein S5, mitochondrial
A2.transcripts:Locus_1_Transcript_48743_107551_Confidence_0.001_Length_15684	Anisakis	A0A4E9FGT7	38.6	1139	1.22e-179	0.0204386271893826	4.9963	TrEMBL	A0A4E9FGT7_BRUMA	NA	1081	NA	Bm8424	Brugia malayi	SH3 domain-containing protein
A2.transcripts:Locus_2354_Transcript_1_16_Confidence_0.038_Length_500	Anisakis	A0A0M3KH04	100	79	8.23e-50	0.0001142912151997	4.98902	TrEMBL	A0A0M3KH04_ANISI	Very-long-chain 3-oxoacyl-CoA synthase	94	NA	ASIM_LOCUS19652	Anisakis simplex	Elongation of very long chain fatty acids protein
A0.A5.NODE_24798_length_990_cov_38.081309_g10648_i0	Anisakis	A0A7I4YWY2	54.4	79	7.59e-23	0.048768457789697	4.98481	TrEMBL	A0A7I4YWY2_HAECO	NA	268	NA	NA	Haemonchus contortus	Reverse transcriptase domain-containing protein
A2.transcripts:Locus_1_Transcript_76750_107551_Confidence_0.000_Length_261	Anisakis	KHN88925.1	88.0	50	1.76e-22	0.0092653371860207	4.98196	Nr	KHN88925	Long-chain fatty acid transport protein 4 [Toxocara canis]	620	INV	Slc27a4	Toxocara canis	Long-chain fatty acid transport protein 4
A2.transcripts:Locus_19746_Transcript_4_9_Confidence_0.538_Length_588	Anisakis	A0A0M3JVC1	98.8	86	3.17e-50	1.67000703285139e-09	4.98173	TrEMBL	A0A0M3JVC1_ANISI	NA	293	NA	ASIM_LOCUS11636	Anisakis simplex	Col_cuticle_N domain-containing protein
A0.A1.NODE_17854_length_1373_cov_17.435681_g8125_i0	Anisakis	A0A0M3JZK3	99.7	360	3.86e-256	8.97693927406881e-11	4.96565	TrEMBL	A0A0M3JZK3_ANISI	NA	360	NA	ASIM_LOCUS13369	Anisakis simplex	Poly(U)-specific endoribonuclease
A2.transcripts:Locus_1317_Transcript_3_15_Confidence_0.171_Length_247	Anisakis	A0A0M3K555	100	44	1.46e-22	6.79355388356038e-32	4.96473	TrEMBL	A0A0M3K555_ANISI	NA	292	NA	ASIM_LOCUS15503	Anisakis simplex	Col_cuticle_N domain-containing protein
A2.transcripts:Locus_8484_Transcript_1_1_Confidence_0.000_Length_667	Anisakis	A0A0M3HZL0	55.5	155	5.37e-45	0.040375052461793	4.95554	TrEMBL	A0A0M3HZL0_ASCLU	NA	152	NA	NA	Ascaris lumbricoides	DUF3719 domain-containing protein
A0.A5.NODE_26229_length_912_cov_20.264672_g11392_i0	Anisakis	VBC09016.1	71.9	196	1.62e-91	0.0494080453620537	4.94346	Nr	VBC09016	Cell wall-associated hydrolase [Burkholderia pseudomallei]	234	BCT	NA	Burkholderia pseudomallei	Cell wall-associated hydrolase
A0.A5.NODE_39759_length_449_cov_2.672414_g21740_i0	Anisakis	A0A0B2V4A9	64.0	89	4.96e-33	0.000206293260676815	4.94103	TrEMBL	A0A0B2V4A9_TOXCA	NA	218	NA	nas-14	Toxocara canis	Metalloendopeptidase
A2.transcripts:Locus_642_Transcript_17_21_Confidence_0.519_Length_6517	Anisakis	KHN71723.1	79.6	1127	0.0	0.0155664871920719	4.93967	Nr	KHN71723	Neogenin [Toxocara canis]	1150	INV	Neo1	Toxocara canis	Neogenin
A2.transcripts:Locus_3019_Transcript_22_33_Confidence_0.244_Length_992	Anisakis	A0A0M3I3I5	63.8	58	1.11e-12	0.00579296329914583	4.93655	TrEMBL	A0A0M3I3I5_ASCLU	NA	288	NA	NA	Ascaris lumbricoides	Col_cuticle_N domain-containing protein
A0.A5.NODE_3590_length_3427_cov_134.398050_g1726_i1	Anisakis	A0A0M3JVC1	99.6	246	9.98e-44	9.17287937938105e-11	4.92839	TrEMBL	A0A0M3JVC1_ANISI	NA	293	NA	ASIM_LOCUS11636	Anisakis simplex	Col_cuticle_N domain-containing protein
A0.A2.NODE_7271_length_624_cov_58.631933_g6297_i0	Anisakis	KHN78309.1	71.8	117	1.98e-51	0.00763169172988666	4.91893	Nr	KHN78309	Putative uncharacterized transposon-derived protein F52C9.6 [Toxocara canis]	162	INV	F52C9.6	Toxocara canis	putative uncharacterized transposon-derived protein F52C9.6
A2.transcripts:Locus_22057_Transcript_1_3_Confidence_0.615_Length_829	Anisakis	KHN82618.1	63.0	303	3.59e-126	0.00871461045152071	4.91673	Nr	KHN82618	DUOXA-like protein C06E1.3 [Toxocara canis]	343	INV	C06E1.3	Toxocara canis	DUOXA-like protein C06E1.3
A2.transcripts:Locus_1514_Transcript_65_67_Confidence_0.180_Length_2123	Anisakis	A0A0M3J266	100	188	2.71e-128	6.2574402448528e-16	4.90727	TrEMBL	A0A0M3J266_ANISI	NA	188	NA	ASIM_LOCUS1498	Anisakis simplex	Protein-L-isoaspartate O-methyltransferase
A0.A5.NODE_17146_length_1488_cov_21.837370_g7342_i0	Anisakis	A0A0B2V3Y0	45.3	382	1.70e-93	0.0398291799740175	4.90562	TrEMBL	A0A0B2V3Y0_TOXCA	NA	335	NA	b3gnt5-b	Toxocara canis	Hexosyltransferase
A2.transcripts:Locus_7222_Transcript_1_1_Confidence_0.000_Length_451	Anisakis	XP_001892764.1	67.9	134	2.97e-62	5.57998619867013e-05	4.90487	Nr	XP_001892764	putative 18.4 kDa protein T05H10.3 in chromosome II precursor, putative [Brugia malayi]	160	INV	Bm363	Brugia malayi	putative 18.4 kDa protein T05H10.3 in chromosome II precursor, putative
A0.A4.NODE_6303_length_2689_cov_89.460347_g3296_i0	Anisakis	A0A0M3JX15	36.3	509	3.14e-61	0.000656885511602101	4.89573	TrEMBL	A0A0M3JX15_ANISI	NA	391	NA	ASIM_LOCUS12332	Anisakis simplex	Lipase_3 domain-containing protein
A2.transcripts:Locus_7291_Transcript_2_2_Confidence_0.000_Length_437	Anisakis	KHN79906.1	89.0	145	3.47e-81	0.0191616717437784	4.89509	Nr	KHN79906	TWiK family of potassium channels protein 7 [Toxocara canis]	577	INV	twk-7	Toxocara canis	TWiK family of potassium channels protein 7
A1.A1.R3378315	Anisakis	A0A016SPS7	45.9	388	4.65e-111	3.69157471166274e-09	4.89264	TrEMBL	A0A016SPS7_9BILA	NA	395	NA	Acey_s0195.g1504	Ancylostoma ceylanicum	Peptidase A1 domain-containing protein
A2.transcripts:Locus_163_Transcript_8_53_Confidence_0.126_Length_1040	Anisakis	A0A0M3K1S8	84.8	211	4.80e-113	1.33406238572176e-11	4.88899	TrEMBL	A0A0M3K1S8_ANISI	NA	507	NA	ASIM_LOCUS14243	Anisakis simplex	Tetraspanin
A0.A0.NODE_33452_length_314_cov_1.552124_g25152_i0	Anisakis	A0A158R449	67.3	104	7.89e-43	0.0452947313418032	4.88014	TrEMBL	A0A158R449_9BILA	NA	1508	NA	NA	Syphacia muris	Chitin synthase
A0.A1.NODE_20088_length_1185_cov_18.206619_g9114_i0	Anisakis	M1DBW2	50.4	226	3.84e-46	0.00297788616437866	4.87054	TrEMBL	M1DBW2_SOLTU	NA	354	NA	NA	Solanum tuberosum	30S ribosomal protein S12, chloroplastic
A2.transcripts:Locus_17135_Transcript_3_4_Confidence_0.500_Length_2279	Anisakis	KHN76106.1	70.2	376	1.76e-194	0.00304504824480656	4.86225	Nr	KHN76106	SEC14-like protein 2 [Toxocara canis]	395	INV	SEC14L2	Toxocara canis	SEC14-like protein 2
A1.A1.S1818409	Anisakis	CRZ24970.1	45.1	175	1.21e-46	0.000512812916753997	4.86023	Nr	CRZ24970	Bm6762 [Brugia malayi]	514	INV	Bm6762	Brugia malayi	Bm6762
A2.transcripts:Locus_7735_Transcript_12_12_Confidence_0.000_Length_778	Anisakis	KHN88251.1	59.3	199	7.78e-75	0.00519297610691315	4.84821	Nr	KHN88251	Methyltransferase-like protein 13 [Toxocara canis]	365	INV	METTL13	Toxocara canis	Methyltransferase-like protein 13
A0.A1.NODE_18355_length_1328_cov_1071.506741_g7488_i1	Anisakis	KHN88199.1	83.6	286	8.36e-46	0.0441083088634121	4.84435	Nr	KHN88199	Cuticle collagen 40 [Toxocara canis]	288	INV	col-40	Toxocara canis	Cuticle collagen 40
A2.transcripts:Locus_1833_Transcript_2_5_Confidence_0.500_Length_960	Anisakis	Q22038.1	94.3	159	2.39e-106	0.0446407256279768	4.83747	Swiss-Prot	RHO1_CAEEL	RecName: Full=Ras-like GTP-binding protein rhoA; Flags: Precursor	192	INV	NA	Caenorhabditis elegans	Ras-like GTP-binding protein rhoA
A0.A6.NODE_6307_length_2163_cov_229.835520_g3715_i0	Anisakis	A0A0B2VXG2	82.9	503	6.81e-313	0.00144381167631471	4.83016	TrEMBL	A0A0B2VXG2_TOXCA	NA	503	NA	Gdh	Toxocara canis	Glutamate dehydrogenase
A0.A1.NODE_25368_length_797_cov_2.360274_g12260_i0	Anisakis	QRW38240.1	71.5	228	2.53e-98	0.00318988184429062	4.82044	Nr	QRW38240	glutamate-gated chloride channel subunit 4 [Parascaris univalens]	512	INV	GLC-4	Parascaris univalens	glutamate-gated chloride channel subunit 4
A2.transcripts:Locus_1_Transcript_72581_107551_Confidence_0.000_Length_768	Anisakis	A0A0M3I681	73.4	158	2.52e-57	0.00019041130493784	4.80251	TrEMBL	A0A0M3I681_ASCLU	NA	818	NA	NA	Ascaris lumbricoides	SSD domain-containing protein
A1.A1.S3362855	Anisakis	KAF8354527.1	81.3	32	4.18e-10	0.0361405680535472	4.80021	Nr	KAF8354527	cht-1, partial [Pristionchus pacificus]	596	INV	NA	Pristionchus pacificus	cht-1
A2.transcripts:Locus_12114_Transcript_4_7_Confidence_0.600_Length_922	Anisakis	KHN81096.1	56.6	159	6.67e-45	0.00339295992770525	4.79988	Nr	KHN81096	Paired box protein Pax-6 [Toxocara canis]	231	INV	ey	Toxocara canis	Paired box protein Pax-6
A2.transcripts:Locus_19746_Transcript_2_9_Confidence_0.615_Length_1847	Anisakis	A0A0M3JVC1	70.5	414	1.20e-58	8.60227057784162e-10	4.79332	TrEMBL	A0A0M3JVC1_ANISI	NA	293	NA	ASIM_LOCUS11636	Anisakis simplex	Col_cuticle_N domain-containing protein
A2.transcripts:Locus_3390_Transcript_5_9_Confidence_0.125_Length_367	Anisakis	KHN72314.1	62.1	95	4.01e-26	0.00238110169478282	4.79157	Nr	KHN72314	C-type lectin protein [Toxocara canis]	605	INV	clec-160	Toxocara canis	C-type lectin protein
A0.A2.NODE_2350_length_1241_cov_1316.832508_g1968_i0	Anisakis	A0A0B2UZ67	75.8	219	1.41e-120	0.000388925275784066	4.78103	TrEMBL	A0A0B2UZ67_TOXCA	Very-long-chain 3-oxoacyl-CoA synthase	266	NA	elo-4	Toxocara canis	Elongation of very long chain fatty acids protein
A0.A2.NODE_2096_length_1315_cov_54.764386_g1752_i0	Anisakis	A0A0M3JXR5	71.3	348	1.19e-152	0.0211371191488924	4.74825	TrEMBL	A0A0M3JXR5_ANISI	NA	477	NA	ASIM_LOCUS12621	Anisakis simplex	BPI2 domain-containing protein
A2.transcripts:Locus_13126_Transcript_9_12_Confidence_0.583_Length_573	Anisakis	BAJ78222.1	62.0	129	3.30e-08	0.0103941275197959	4.74704	Nr	BAJ78222	Ani s 11-like protein 2 precursor, partial [Anisakis simplex]	287	INV	Anis11L2	Anisakis simplex	Ani s 11-like protein 2 precursor
A2.transcripts:Locus_124_Transcript_30_36_Confidence_0.250_Length_2337	Anisakis	KHN74579.1	53.9	653	2.70e-233	0.00674788027190216	4.74516	Nr	KHN74579	Putative serine protease K12H4.7, partial [Toxocara canis]	1094	INV	K12H4.7	Toxocara canis	putative serine protease K12H4.7
A2.transcripts:Locus_1204_Transcript_6_8_Confidence_0.467_Length_2027	Anisakis	CDJ86017.1	47.1	157	9.65e-33	0.0372498645788009	4.73634	Nr	CDJ86017	CRE-GLB-20 protein [Haemonchus contortus]	251	INV	NA	Haemonchus contortus	CRE-GLB-20 protein
A0.A1.NODE_17240_length_1428_cov_549.005143_g7839_i0	Anisakis	A0A158PNG4	79.8	247	1.74e-122	0.00246458384461257	4.72862	TrEMBL	A0A158PNG4_ANISI	NA	200	NA	ASIM_LOCUS11401	Anisakis simplex	Isochorismatase domain-containing protein
A0.A2.NODE_19353_length_285_cov_9.792969_g18165_i0	Anisakis	SKY79385.1	71.8	39	2.50e-08	0.0239002391868907	4.72862	Nr	SKY79385	Uncharacterised protein [Mycobacteroides abscessus subsp. abscessus]	177	BCT	NA	Mycobacteroides abscessus subsp. abscessus	Uncharacterised protein
A2.transcripts:Locus_16624_Transcript_10_20_Confidence_0.138_Length_332	Anisakis	KHN88639.1	86.3	73	2.48e-34	0.0257992712235699	4.72551	Nr	KHN88639	Intron-binding protein aquarius [Toxocara canis]	1640	INV	AQR	Toxocara canis	Intron-binding protein aquarius
A2.transcripts:Locus_17454_Transcript_1_1_Confidence_0.833_Length_261	Anisakis	A0A0M3J0F9	91.1	45	1.04e-18	4.67746116570615e-07	4.70767	TrEMBL	A0A0M3J0F9_ANISI	NA	210	NA	ASIM_LOCUS892	Anisakis simplex	Col_cuticle_N domain-containing protein
A1.A5.R3307464	Anisakis	SHT70305.1	82.1	134	1.60e-64	0.0062781507486911	4.70164	Nr	SHT70305	Uncharacterised protein [Mycobacteroides abscessus subsp. abscessus]	144	BCT	NA	Mycobacteroides abscessus subsp. abscessus	Uncharacterised protein
A1.A2.R690613	Anisakis	KHN81970.1	69.4	98	8.04e-42	0.0126733056451407	4.69712	Nr	KHN81970	Major facilitator superfamily domain-containing protein 8 [Toxocara canis]	543	INV	mfsd8	Toxocara canis	Major facilitator superfamily domain-containing protein 8
A0.A1.NODE_16798_length_1467_cov_1569.692143_g2505_i2	Anisakis	A0A0M3JVC1	99.1	106	5.18e-44	0.000108234764691458	4.69326	TrEMBL	A0A0M3JVC1_ANISI	NA	293	NA	ASIM_LOCUS11636	Anisakis simplex	Col_cuticle_N domain-containing protein
A0.A5.NODE_5365_length_2912_cov_596.545138_g2624_i0	Anisakis	KHN73025.1	65.1	218	1.27e-69	0.00135036725972711	4.6923	Nr	KHN73025	THO complex subunit 4-B [Toxocara canis]	353	INV	alyref-b	Toxocara canis	THO complex subunit 4-B
A0.A5.NODE_21834_length_1165_cov_17.869875_g9248_i0	Anisakis	A0A0N5D9F4	59.3	295	7.11e-117	0.0444554560919184	4.66967	TrEMBL	A0A0N5D9F4_THECL	NA	389	NA	TCLT_LOCUS9752	Thelazia callipaeda	KH domain-containing protein
A2.transcripts:Locus_3_Transcript_8405_70181_Confidence_0.000_Length_1530	Anisakis	KHN75849.1	75.1	177	4.31e-99	0.00104131608938444	4.66805	Nr	KHN75849	Testican-3 [Toxocara canis]	350	INV	Spock3	Toxocara canis	Testican-3
A2.transcripts:Locus_4_Transcript_431_510_Confidence_0.004_Length_1075	Anisakis	P17657.2	91.3	23	1.84e-07	0.00961281793353532	4.65903	Swiss-Prot	DPY13_CAEEL	RecName: Full=Cuticle collagen dpy-13; AltName: Full=Protein dumpy-13	302	INV	NA	Caenorhabditis elegans	Cuticle collagen dpy-13
A0.A4.NODE_7747_length_2406_cov_51.711628_g3966_i0	Anisakis	A0A0M3I2K1	31.0	290	8.40e-29	0.000223948296645185	4.64627	TrEMBL	A0A0M3I2K1_ASCLU	NA	290	NA	NA	Ascaris lumbricoides	Glycine N-acyltransferase-like protein
A0.A5.NODE_7042_length_2591_cov_88.587520_g3343_i0	Anisakis	APP18137.1	99.8	554	0.0	0.0373362960195835	4.63445	Nr	APP18137	hexokinase 1 [Anisakis simplex]	554	INV	HK1	Anisakis simplex	hexokinase 1
A2.transcripts:Locus_2225_Transcript_51_71_Confidence_0.106_Length_1907	Anisakis	KHN76277.1	48.3	174	1.59e-39	0.0477886248796096	4.62648	Nr	KHN76277	Ribonuclease Oy [Toxocara canis]	381	INV	NA	Toxocara canis	Ribonuclease Oy
A1.A2.J707059	Anisakis	CJS63439.1	65.3	101	6.00e-34	0.0361636629715143	4.61496	Nr	CJS63439	Uncharacterised protein [Streptococcus pneumoniae]	157	BCT	NA	Streptococcus pneumoniae	Uncharacterised protein
A2.transcripts:Locus_2056_Transcript_39_73_Confidence_0.229_Length_2553	Anisakis	A0A158N8F3	62.4	303	1.75e-110	1.38263434233925e-09	4.60597	TrEMBL	A0A158N8F3_ONCVO	NA	270	NA	NA	Onchocerca volvulus	CaMKII_AD domain-containing protein
A0.A2.NODE_1486_length_1516_cov_128.590451_g1233_i0	Anisakis	CRZ24408.1	60.4	48	5.29e-13	0.0215230415016126	4.59228	Nr	CRZ24408	Bm5809 [Brugia malayi]	421	INV	Bm5809	Brugia malayi	Bm5809
A0.A1.NODE_8939_length_2395_cov_91.182560_g3889_i1	Anisakis	G5EC68.1	67.4	43	3.76e-09	0.0123932002581745	4.59039	Swiss-Prot	ABF2_CAEEL	RecName: Full=Antibacterial factor-related peptide 2; Flags: Precursor	85	INV	NA	Caenorhabditis elegans	Antibacterial factor-related peptide 2
A2.transcripts:Locus_1_Transcript_102350_107551_Confidence_0.000_Length_819	Anisakis	A0A158PPL5	84.8	112	1.92e-42	0.00177167765174288	4.57608	TrEMBL	A0A158PPL5_ANISI	NA	1578	NA	ASIM_LOCUS14422	Anisakis simplex	Structural maintenance of chromosomes protein 4
A2.transcripts:Locus_4211_Transcript_16_24_Confidence_0.245_Length_1528	Anisakis	A0A0M3J4C2	87.2	328	1.96e-203	2.30275207486063e-06	4.56026	TrEMBL	A0A0M3J4C2_ANISI	NA	300	NA	ASIM_LOCUS2256	Anisakis simplex	ERAP1_C domain-containing protein
A0.A5.NODE_29596_length_758_cov_65.548252_g13376_i0	Anisakis	KHN77544.1	72.2	36	1.25e-07	1.29180604696619e-05	4.5468	Nr	KHN77544	Putative serine protease F56F10.1 [Toxocara canis]	986	INV	F56F10.1	Toxocara canis	putative serine protease F56F10.1
A2.transcripts:Locus_619_Transcript_29_56_Confidence_0.323_Length_2911	Anisakis	CDJ97188.1	49.2	358	6.56e-113	0.00182589145926618	4.54505	Nr	CDJ97188	Peptidase S28 domain containing protein [Haemonchus contortus]	503	INV	NA	Haemonchus contortus	Peptidase S28 domain containing protein
A2.transcripts:Locus_3_Transcript_60597_70181_Confidence_0.000_Length_1261	Anisakis	A0A3P6Q4M3	97.6	127	1.69e-78	4.76980857469312e-14	4.54366	TrEMBL	A0A3P6Q4M3_ANISI	NA	131	NA	ASIM_LOCUS9554	Anisakis simplex	MOFRL domain-containing protein
A2.transcripts:Locus_1510_Transcript_17_23_Confidence_0.484_Length_2044	Anisakis	F1L2P6	50.1	527	2.61e-182	2.45079798909622e-08	4.53336	TrEMBL	F1L2P6_ASCSU	NA	543	NA	NA	Ascaris suum	Carboxypeptidase
A2.transcripts:Locus_327_Transcript_35_46_Confidence_0.210_Length_2068	Anisakis	SIK19370.1	96.0	149	2.57e-94	0.0352414680769335	4.52853	Nr	SIK19370	Uncharacterised protein [Mycobacteroides abscessus subsp. abscessus]	314	BCT	NA	Mycobacteroides abscessus subsp. abscessus	Uncharacterised protein
A1.A1.R3410754	Anisakis	KHN72723.1	56.0	116	3.66e-36	0.00458533419997813	4.52363	Nr	KHN72723	Collagen alpha-3(VI) chain [Toxocara canis]	145	INV	COL6A3	Toxocara canis	Collagen alpha-3(VI) chain
A2.transcripts:Locus_24321_Transcript_4_5_Confidence_0.714_Length_784	Anisakis	KHN74592.1	62.9	124	2.59e-48	0.0332226544151281	4.51829	Nr	KHN74592	Putative serine protease K12H4.7, partial [Toxocara canis]	1661	INV	K12H4.7	Toxocara canis	putative serine protease K12H4.7
A1.A1.R3412228	Anisakis	CDQ01460.1	58.8	51	2.82e-11	1.09622025748603e-05	4.51658	Nr	CDQ01460	Bm812, partial [Brugia malayi]	105	INV	Bm812	Brugia malayi	Bm812
A2.transcripts:Locus_3840_Transcript_22_24_Confidence_0.286_Length_1426	Anisakis	A0A0M3KGD5	100	119	5.94e-73	1.18128622055788e-05	4.50694	TrEMBL	A0A0M3KGD5_ANISI	NA	238	NA	ASIM_LOCUS19433	Anisakis simplex	Col_cuticle_N domain-containing protein
A2.transcripts:Locus_7404_Transcript_8_33_Confidence_0.035_Length_465	Anisakis	A0A0M3K367	100	52	1.06e-25	0.0294797247496357	4.50399	TrEMBL	A0A0M3K367_ANISI	NA	963	NA	ASIM_LOCUS14813	Anisakis simplex	S5 DRBM domain-containing protein
A2.transcripts:Locus_3_Transcript_53801_70181_Confidence_0.000_Length_1885	Anisakis	A0A0M3JUA8	98.2	398	3.18e-282	0.0338846242175145	4.50347	TrEMBL	A0A0M3JUA8_ANISI	NA	500	NA	ASIM_LOCUS11219	Anisakis simplex	Glutathione synthetase
A2.transcripts:Locus_6917_Transcript_9_9_Confidence_0.133_Length_1521	Anisakis	KHN76885.1	30.0	323	3.28e-15	0.00942337382433343	4.5029	Nr	KHN76885	Putative cuticle collagen [Toxocara canis]	593	INV	col-155	Toxocara canis	putative cuticle collagen
A0.A6.NODE_37325_length_197_cov_1.726190_g28824_i0	Anisakis	A0A0M3K9Q9	68.5	54	2.76e-13	0.0466094196011745	4.49171	TrEMBL	A0A0M3K9Q9_ANISI	NA	560	NA	ASIM_LOCUS17107	Anisakis simplex	VWFA domain-containing protein
A0.A6.NODE_1810_length_3731_cov_5.683684_g1148_i0	Anisakis	KHN73026.1	55.8	758	5.82e-219	0.000236611594964139	4.49104	Nr	KHN73026	Chondroadherin-like protein [Toxocara canis]	698	INV	CHADL	Toxocara canis	Chondroadherin-like protein
A0.A5.NODE_21012_length_1219_cov_4.292517_g8890_i0	Anisakis	KHN85314.1	35.6	385	2.07e-79	0.0293351607634842	4.48998	Nr	KHN85314	Putative acid phosphatase F26C11.1 [Toxocara canis]	967	INV	F26C11.1	Toxocara canis	putative acid phosphatase F26C11.1
A0.A3.NODE_3126_length_1453_cov_217.745084_g2486_i0	Anisakis	J9EN17	84.4	135	8.26e-48	0.0448273992638717	4.47591	TrEMBL	J9EN17_WUCBA	NA	171	NA	WUBG_12372	Wuchereria bancrofti	Col_cuticle_N domain-containing protein
A0.A4.NODE_16958_length_1206_cov_15.815451_g8158_i0	Anisakis	KHN81970.1	70.5	129	1.65e-56	0.00100713039187851	4.47179	Nr	KHN81970	Major facilitator superfamily domain-containing protein 8 [Toxocara canis]	543	INV	mfsd8	Toxocara canis	Major facilitator superfamily domain-containing protein 8
A2.transcripts:Locus_1_Transcript_58050_107551_Confidence_0.000_Length_1881	Anisakis	KHN79150.1	70.0	363	7.99e-144	0.00089612392511366	4.46597	Nr	KHN79150	Collagen alpha-1(XII) chain [Toxocara canis]	583	INV	COL12A1	Toxocara canis	Collagen alpha-1(XII) chain
A0.A2.NODE_397_length_2356_cov_68.306833_g316_i0	Anisakis	KHN85314.1	35.2	670	7.79e-129	8.86449628455397e-06	4.45744	Nr	KHN85314	Putative acid phosphatase F26C11.1 [Toxocara canis]	967	INV	F26C11.1	Toxocara canis	putative acid phosphatase F26C11.1
A2.transcripts:Locus_37342_Transcript_1_1_Confidence_0.000_Length_473	Anisakis	KHN81573.1	45.6	147	1.33e-40	0.00619798525406779	4.45386	Nr	KHN81573	Hemicentin-1, partial [Toxocara canis]	229	INV	HMCN1	Toxocara canis	Hemicentin-1
A0.A4.NODE_19150_length_988_cov_3.650475_g9278_i0	Anisakis	CRZ23058.1	42.5	226	4.75e-53	0.0186516065355565	4.44674	Nr	CRZ23058	Bm5106 [Brugia malayi]	250	INV	Bm5106	Brugia malayi	Bm5106
A2.transcripts:Locus_3018_Transcript_1_9_Confidence_0.524_Length_1730	Anisakis	KHN73650.1	48.2	606	1.29e-138	0.0046942451403555	4.44071	Nr	KHN73650	Transmembrane cell adhesion receptor mua-3 [Toxocara canis]	2434	INV	mua-3	Toxocara canis	Transmembrane cell adhesion receptor mua-3
A2.transcripts:Locus_919_Transcript_12_29_Confidence_0.333_Length_2102	Anisakis	AZA15243.1	88.1	637	0.0	0.000513494548819991	4.43548	Nr	AZA15243	peptide transporter family 1 [Anisakis pegreffii]	862	INV	pept-1	Anisakis pegreffii	peptide transporter family 1
A0.A1.NODE_13531_length_1807_cov_6.260345_g6298_i0	Anisakis	KHN72222.1	78.4	436	6.53e-228	0.000440017899734179	4.43205	Nr	KHN72222	Calcium/calmodulin-dependent protein kinase kinase 2 [Toxocara canis]	463	INV	Camkk2	Toxocara canis	Calcium/calmodulin-dependent protein kinase kinase 2
A0.A4.NODE_14796_length_1433_cov_4.461925_g7164_i0	Anisakis	A0A0M3K4J5	99.3	276	1.27e-180	0.00152033143691999	4.43196	TrEMBL	A0A0M3K4J5_ANISI	NA	304	NA	NA	Anisakis simplex	G_PROTEIN_RECEP_F1_2 domain-containing protein
A2.transcripts:Locus_16_Transcript_8_9_Confidence_0.316_Length_1550	Anisakis	A0A0M3JVB9	100	89	1.07e-46	0.0458152574798519	4.42772	TrEMBL	A0A0M3JVB9_ANISI	NA	292	NA	ASIM_LOCUS11634	Anisakis simplex	Col_cuticle_N domain-containing protein
A2.transcripts:Locus_13022_Transcript_4_10_Confidence_0.227_Length_1233	Anisakis	A0A183TZL2	76.1	159	6.23e-82	7.51929036853934e-05	4.41509	TrEMBL	A0A183TZL2_TOXCA	Very-long-chain 3-oxoacyl-CoA synthase	309	NA	TCNE_LOCUS1682	Toxocara canis	Elongation of very long chain fatty acids protein
A0.A0.NODE_38106_length_270_cov_1.739535_g29806_i0	Anisakis	CDP91864.1	48.2	85	2.02e-12	0.0399099888424083	4.4129	Nr	CDP91864	BMA-INSC-1, isoform d [Brugia malayi]	879	INV	Bma-insc-1	Brugia malayi	BMA-INSC-1, isoform d
A1.A2.S610520	Anisakis	A0A0M3KCQ6	100	60	4.08e-35	0.0271168800790638	4.41032	TrEMBL	A0A0M3KCQ6_ANISI	NA	442	NA	ASIM_LOCUS18154	Anisakis simplex	Phosphatidylinositol 4-kinase type 2
A2.transcripts:Locus_15788_Transcript_1_6_Confidence_0.500_Length_503	Anisakis	KHN74504.1	37.8	172	1.03e-22	0.0252866841349104	4.40749	Nr	KHN74504	Platelet endothelial aggregation receptor 1 [Toxocara canis]	410	INV	PEAR1	Toxocara canis	Platelet endothelial aggregation receptor 1
A0.A4.NODE_9145_length_2175_cov_106.370665_g4602_i0	Anisakis	A0A0M3I2K1	33.0	288	8.24e-38	1.81253379419819e-07	4.40135	TrEMBL	A0A0M3I2K1_ASCLU	NA	290	NA	NA	Ascaris lumbricoides	Glycine N-acyltransferase-like protein
A1.A0.S1762811	Anisakis	EPB73802.1	57.5	40	5.58e-07	0.0100125969323098	4.40022	Nr	EPB73802	serine carboxypeptidase S28 [Ancylostoma ceylanicum]	1067	INV	NA	Ancylostoma ceylanicum	serine carboxypeptidase S28
A0.A1.NODE_12394_length_1935_cov_24.132762_g3536_i1	Anisakis	A0A0M3J266	97.1	139	4.53e-86	3.24771009495935e-05	4.39982	TrEMBL	A0A0M3J266_ANISI	NA	188	NA	ASIM_LOCUS1498	Anisakis simplex	Protein-L-isoaspartate O-methyltransferase
A0.A4.NODE_12767_length_1674_cov_34.595224_g6293_i0	Anisakis	P49673.1	85.9	291	4.16e-185	0.00773579167320283	4.38326	Swiss-Prot	KAPC_ASCSU	RecName: Full=cAMP-dependent protein kinase catalytic subunit; Short=PKA C	337	INV	NA	Ascaris suum	cAMP-dependent protein kinase catalytic subunit
A2.transcripts:Locus_3023_Transcript_40_46_Confidence_0.394_Length_2795	Anisakis	KHN83852.1	62.8	172	1.55e-56	0.000742277117389802	4.37798	Nr	KHN83852	Short-chain dehydrogenase/reductase family 9C member 7 [Toxocara canis]	448	INV	SDR9C7	Toxocara canis	Short-chain dehydrogenase/reductase family 9C member 7
A2.transcripts:Locus_7725_Transcript_1_1_Confidence_0.000_Length_985	Anisakis	A0A0M3K421	99.1	220	4.92e-158	0.000227624692962472	4.37782	TrEMBL	A0A0M3K421_ANISI	NA	233	NA	ASIM_LOCUS15119	Anisakis simplex	Protein kinase domain-containing protein
A0.A1.NODE_21883_length_1042_cov_205.934359_g3889_i5	Anisakis	G5EC68.1	50.0	50	8.85e-08	0.027604252243977	4.3744	Swiss-Prot	ABF2_CAEEL	RecName: Full=Antibacterial factor-related peptide 2; Flags: Precursor	85	INV	NA	Caenorhabditis elegans	Antibacterial factor-related peptide 2
A1.A1.R3329874	Anisakis	F1L2P6	49.9	527	7.42e-182	0.000545843297539986	4.36767	TrEMBL	F1L2P6_ASCSU	NA	543	NA	NA	Ascaris suum	Carboxypeptidase
A2.transcripts:Locus_1058_Transcript_2_2_Confidence_0.000_Length_472	Anisakis	KHN74655.1	78.8	52	1.97e-15	0.0239787490776469	4.35674	Nr	KHN74655	Nuclear hormone receptor family member nhr-91 [Toxocara canis]	146	INV	nhr-91	Toxocara canis	Nuclear hormone receptor family member nhr-91
A2.transcripts:Locus_3298_Transcript_2_10_Confidence_0.321_Length_1767	Anisakis	A0A0M3J266	96.8	188	1.27e-125	9.46490411655262e-15	4.35104	TrEMBL	A0A0M3J266_ANISI	NA	188	NA	ASIM_LOCUS1498	Anisakis simplex	Protein-L-isoaspartate O-methyltransferase
A2.transcripts:Locus_20055_Transcript_2_2_Confidence_0.000_Length_597	Anisakis	A0A4U8UK26	88.4	198	1.79e-114	0.000182770608516755	4.34837	TrEMBL	A0A4U8UK26_STECR	NA	704	NA	L596_000656	Steinernema carpocapsae	Chitin synthase
A0.A1.NODE_21189_length_1094_cov_23.760467_g9686_i0	Anisakis	KHN74592.1	78.8	137	2.04e-67	9.33559526567026e-06	4.34668	Nr	KHN74592	Putative serine protease K12H4.7, partial [Toxocara canis]	1661	INV	K12H4.7	Toxocara canis	putative serine protease K12H4.7
A2.transcripts:Locus_456_Transcript_31_36_Confidence_0.453_Length_1386	Anisakis	A0A023W3Z5	99.4	316	1.23e-212	6.72843798904837e-14	4.32656	TrEMBL	A0A023W3Z5_ANISI	NA	863	NA	GP	Anisakis simplex	Alpha-1,4 glucan phosphorylase
A0.A2.NODE_11120_length_449_cov_53.057143_g9940_i0	Anisakis	EEY31938.1	83.1	77	1.11e-37	0.00754567079704248	4.32575	Nr	EEY31938	LOW QUALITY PROTEIN: conserved hypothetical protein, partial [Brucella suis bv. 3 str. 686]	77	BCT	NA	Brucella suis bv. 3 str. 686	conserved hypothetical protein
A2.transcripts:Locus_399_Transcript_9_17_Confidence_0.529_Length_1034	Anisakis	A0A0M3IV17	37.8	164	5.54e-17	0.0143820896225421	4.31432	TrEMBL	A0A0M3IV17_ASCLU	NA	248	NA	NA	Ascaris lumbricoides	ShKT domain-containing protein
A0.A5.NODE_6050_length_2765_cov_66.985672_g2936_i0	Anisakis	A0A0M3KCL0	61.2	201	6.51e-44	8.20091737063697e-06	4.30068	TrEMBL	A0A0M3KCL0_ANISI	NA	327	NA	ASIM_LOCUS18106	Anisakis simplex	Col_cuticle_N domain-containing protein
A2.transcripts:Locus_1206_Transcript_19_25_Confidence_0.095_Length_1953	Anisakis	KHN89098.1	57.0	214	1.17e-55	0.00712718441681564	4.29954	Nr	KHN89098	Transmembrane protein -like protein [Toxocara canis]	570	INV	NA	Toxocara canis	Transmembrane protein -like protein
A0.A1.NODE_23589_length_918_cov_5.556992_g11055_i0	Anisakis	A0A0M3J2X1	78.0	200	2.40e-102	0.011874494619749	4.297	TrEMBL	A0A0M3J2X1_ANISI	NA	237	NA	ASIM_LOCUS1754	Anisakis simplex	Glucuronosyltransferase
A0.A0.NODE_11168_length_1533_cov_5.859946_g6111_i0	Anisakis	CDJ90737.1	34.9	86	8.82e-11	0.000927205531802525	4.29645	Nr	CDJ90737	Protein T21D12.14 [Haemonchus contortus]	132	INV	NA	Haemonchus contortus	Protein T21D12.14
A2.transcripts:Locus_1283_Transcript_26_81_Confidence_0.010_Length_758	Anisakis	F1L2Y6	94.6	37	4.02e-14	0.0425664965332557	4.29508	TrEMBL	F1L2Y6_ASCSU	NA	420	NA	NA	Ascaris suum	Zinc metalloproteinase
A0.A5.NODE_31101_length_699_cov_3.429878_g12182_i1	Anisakis	KHN74579.1	58.1	155	1.26e-53	0.0324918207768014	4.2938	Nr	KHN74579	Putative serine protease K12H4.7, partial [Toxocara canis]	1094	INV	K12H4.7	Toxocara canis	putative serine protease K12H4.7
A0.A2.NODE_19417_length_284_cov_21.047059_g18229_i0	Anisakis	CDJ82539.1	60.7	61	3.90e-11	7.36016336857988e-06	4.28887	Nr	CDJ82539	C. briggsae CBR-PQN-13 protein [Haemonchus contortus]	218	INV	NA	Haemonchus contortus	C. briggsae CBR-PQN-13 protein
A2.transcripts:Locus_3901_Transcript_3_7_Confidence_0.231_Length_1066	Anisakis	A0A0M3JYX1	99.3	137	3.82e-82	0.0481604960684692	4.28732	TrEMBL	A0A0M3JYX1_ANISI	NA	317	NA	ASIM_LOCUS13093	Anisakis simplex	CCDC92 domain-containing protein
A1.A4.R2428358	Anisakis	A0A0M3K9Q9	73.2	590	1.58e-298	0.000871124908939323	4.28629	TrEMBL	A0A0M3K9Q9_ANISI	NA	560	NA	ASIM_LOCUS17107	Anisakis simplex	VWFA domain-containing protein
A2.transcripts:Locus_4_Transcript_437_510_Confidence_0.012_Length_3164	Anisakis	A0A0M3II63	66.3	341	4.35e-153	1.2373220332292e-06	4.28121	TrEMBL	A0A0M3II63_ASCLU	NA	355	NA	NA	Ascaris lumbricoides	Epimerase domain-containing protein
A2.transcripts:Locus_3_Transcript_32591_70181_Confidence_0.000_Length_3481	Anisakis	A0A0B2UNE0	67.6	290	1.80e-122	3.95042073191853e-05	4.27943	TrEMBL	A0A0B2UNE0_TOXCA	NA	238	NA	Rnf115	Toxocara canis	RING-type E3 ubiquitin transferase
A0.A5.NODE_15828_length_1588_cov_81.257605_g6850_i0	Anisakis	VMP19955.1	82.9	117	7.98e-56	0.0219104113808269	4.26972	Nr	VMP19955	Uncharacterised protein [Streptococcus pneumoniae]	126	BCT	NA	Streptococcus pneumoniae	Uncharacterised protein
A0.A4.NODE_4487_length_3150_cov_39.758443_g2431_i0	Anisakis	KHN86060.1	83.1	219	7.07e-119	0.0379090748221597	4.26212	Nr	KHN86060	Beta-lactamase domain-containing protein 2 [Toxocara canis]	464	INV	lact-2	Toxocara canis	Beta-lactamase domain-containing protein 2
A0.A4.NODE_30070_length_363_cov_1.416149_g18415_i0	Anisakis	KHN74579.1	33.1	130	1.23e-16	0.0194977531857401	4.26007	Nr	KHN74579	Putative serine protease K12H4.7, partial [Toxocara canis]	1094	INV	K12H4.7	Toxocara canis	putative serine protease K12H4.7
A2.transcripts:Locus_3237_Transcript_14_23_Confidence_0.375_Length_876	Anisakis	A0A0M3IYS1	99.4	178	3.40e-122	0.0141297842084797	4.25755	TrEMBL	A0A0M3IYS1_ANISI	NA	543	NA	ASIM_LOCUS304	Anisakis simplex	Metalloendopeptidase
A0.A1.NODE_20140_length_1180_cov_40.377358_g6496_i2	Anisakis	XP_021954201.1	39.3	117	1.69e-19	0.00834120761766391	4.25722	Nr	XP_021954201	microtubule-associated proteins 1A/1B light chain 3A [Folsomia candida]	126	INV	LOC110850907	Folsomia candida	microtubule-associated proteins 1A/1B light chain 3A
A2.transcripts:Locus_17856_Transcript_1_1_Confidence_0.000_Length_261	Anisakis	A0A0B2VKL8	79.5	83	6.89e-43	0.000126703110937588	4.24823	TrEMBL	A0A0B2VKL8_TOXCA	NA	144	NA	PI4K2B	Toxocara canis	Phosphatidylinositol 4-kinase type 2
A0.A4.NODE_6940_length_2549_cov_58.970096_g3590_i0	Anisakis	A0A1L5SMA4	82.9	490	6.52e-294	0.000345952306239989	4.24651	TrEMBL	A0A1L5SMA4_ANISI	NA	526	NA	AMY	Anisakis simplex	Alpha-amylase
A0.A1.NODE_17228_length_1430_cov_3.163610_g7832_i0	Anisakis	A0A0M3K3F6	99.7	379	6.28e-237	1.59882747547746e-12	4.23465	TrEMBL	A0A0M3K3F6_ANISI	NA	1071	NA	ASIM_LOCUS14904	Anisakis simplex	Chitin synthase
A0.A1.NODE_10390_length_2189_cov_26.902451_g4929_i0	Anisakis	KHN89152.1	80.1	478	5.87e-269	0.00467097536637339	4.23235	Nr	KHN89152	Lysine histidine transporter 1 [Toxocara canis]	524	INV	LHT1	Toxocara canis	Lysine histidine transporter 1
A0.A5.NODE_13162_length_1824_cov_19.027513_g5838_i0	Anisakis	KHN80331.1	85.8	317	1.71e-199	7.06977685661238e-10	4.22323	Nr	KHN80331	Cyclin-dependent kinase 1 [Toxocara canis]	317	INV	cdk-1	Toxocara canis	Cyclin-dependent kinase 1
A2.transcripts:Locus_1_Transcript_8760_107551_Confidence_0.000_Length_2453	Anisakis	A0A0M3K252	100	90	4.24e-48	0.0167361434974278	4.22127	TrEMBL	A0A0M3K252_ANISI	NA	293	NA	ASIM_LOCUS14388	Anisakis simplex	Col_cuticle_N domain-containing protein
A2.transcripts:Locus_11843_Transcript_8_18_Confidence_0.468_Length_4209	Anisakis	A0A0M3JVC1	99.6	238	3.20e-37	7.12881574747464e-08	4.21726	TrEMBL	A0A0M3JVC1_ANISI	NA	293	NA	ASIM_LOCUS11636	Anisakis simplex	Col_cuticle_N domain-containing protein
A0.A5.NODE_11262_length_2026_cov_9.432173_g5053_i0	Anisakis	A0A0M3J0L8	97.3	375	1.37e-262	0.0365260076978344	4.21106	TrEMBL	A0A0M3J0L8_ANISI	NA	379	NA	ASIM_LOCUS951	Anisakis simplex	Bestrophin homolog
A0.A1.NODE_22765_length_978_cov_5.982437_g10543_i0	Anisakis	CDJ83457.1	37.4	262	1.31e-47	0.0308416553326762	4.21048	Nr	CDJ83457	Protein K06A4.2, isoform a [Haemonchus contortus]	296	INV	NA	Haemonchus contortus	Protein K06A4.2, isoform a
A2.transcripts:Locus_14594_Transcript_1_1_Confidence_0.000_Length_1258	Anisakis	KHN82618.1	75.9	340	4.49e-190	0.00283309016981028	4.18847	Nr	KHN82618	DUOXA-like protein C06E1.3 [Toxocara canis]	343	INV	C06E1.3	Toxocara canis	DUOXA-like protein C06E1.3
A0.A0.NODE_18632_length_792_cov_4.164179_g10924_i0	Anisakis	A0A0M3I2K1	33.5	212	3.64e-26	2.3398563797476e-07	4.18632	TrEMBL	A0A0M3I2K1_ASCLU	NA	290	NA	NA	Ascaris lumbricoides	Glycine N-acyltransferase-like protein
A2.transcripts:Locus_1633_Transcript_3_6_Confidence_0.643_Length_1189	Anisakis	A0A0M3K6L1	99.2	123	3.27e-80	9.219290524091e-05	4.18416	TrEMBL	A0A0M3K6L1_ANISI	NA	200	NA	ASIM_LOCUS16009	Anisakis simplex	Superoxide dismutase [Cu-Zn]
A2.transcripts:Locus_964_Transcript_23_24_Confidence_0.298_Length_2767	Anisakis	F1KTI3	70.0	576	1.54e-299	1.58666201550037e-06	4.17987	TrEMBL	F1KTI3_ASCSU	NA	731	NA	NA	Ascaris suum	Procollagen-lysine 5-dioxygenase
A0.A5.NODE_6735_length_2643_cov_41.883077_g3225_i0	Anisakis	BAO86772.1	62.7	228	3.52e-76	0.00337649949782068	4.17953	Nr	BAO86772	putative membrane protein [Burkholderia sp. RPE67]	234	BCT	NA	Burkholderia sp. RPE67	putative membrane protein
A2.transcripts:Locus_1418_Transcript_40_69_Confidence_0.029_Length_2173	Anisakis	KHN81970.1	58.5	544	7.63e-221	0.000492700569747089	4.17107	Nr	KHN81970	Major facilitator superfamily domain-containing protein 8 [Toxocara canis]	543	INV	mfsd8	Toxocara canis	Major facilitator superfamily domain-containing protein 8
A0.A1.NODE_20863_length_1121_cov_22.650854_g9508_i0	Anisakis	A0A0M3K9F9	98.6	143	2.53e-74	6.14370466850085e-13	4.16935	TrEMBL	A0A0M3K9F9_ANISI	NA	287	NA	ASIM_LOCUS17007	Anisakis simplex	Col_cuticle_N domain-containing protein
A2.transcripts:Locus_1352_Transcript_12_71_Confidence_0.098_Length_724	Anisakis	A0A0M3K8E8	98.5	68	1.96e-41	0.0305321190470382	4.15809	TrEMBL	A0A0M3K8E8_ANISI	NA	220	NA	ASIM_LOCUS16646	Anisakis simplex	Col_cuticle_N domain-containing protein
A0.A6.NODE_4372_length_2590_cov_7.222179_g2657_i0	Anisakis	A0A0M3K1D4	93.9	526	0.0	0.0112387837341897	4.15723	TrEMBL	A0A0M3K1D4_ANISI	NA	527	NA	ASIM_LOCUS14083	Anisakis simplex	BTB domain-containing protein
A2.transcripts:Locus_1094_Transcript_10_19_Confidence_0.203_Length_3569	Anisakis	A0A0M3I681	62.7	893	0.0	0.00264860043945991	4.15006	TrEMBL	A0A0M3I681_ASCLU	NA	818	NA	NA	Ascaris lumbricoides	SSD domain-containing protein
A2.transcripts:Locus_157_Transcript_387_622_Confidence_0.043_Length_3077	Anisakis	A0A0M3KAW0	98.9	91	5.48e-47	0.0426239396545807	4.14966	TrEMBL	A0A0M3KAW0_ANISI	NA	123	NA	ASIM_LOCUS17505	Anisakis simplex	Col_cuticle_N domain-containing protein
A2.transcripts:Locus_6934_Transcript_51_60_Confidence_0.126_Length_2392	Anisakis	G5EC68.1	67.2	67	1.09e-22	0.0120862335140435	4.13103	Swiss-Prot	ABF2_CAEEL	RecName: Full=Antibacterial factor-related peptide 2; Flags: Precursor	85	INV	NA	Caenorhabditis elegans	Antibacterial factor-related peptide 2
A2.transcripts:Locus_4609_Transcript_29_47_Confidence_0.213_Length_2198	Anisakis	A0A0N5AW18	49.4	330	7.25e-97	0.0367167879256941	4.12221	TrEMBL	A0A0N5AW18_9BILA	NA	321	NA	NA	Syphacia muris	Acetyltransf_18 domain-containing protein
A1.A1.R3379678	Anisakis	KHN73557.1	82.1	448	1.85e-255	0.00732987531517727	4.10997	Nr	KHN73557	Proton myo-inositol cotransporter [Toxocara canis]	529	INV	SLC2A13	Toxocara canis	Proton myo-inositol cotransporter
A0.A6.NODE_4540_length_2543_cov_6.209626_g1296_i1	Anisakis	KHN82102.1	60.5	190	2.00e-61	1.74289881164969e-06	4.10929	Nr	KHN82102	Paternally-expressed protein [Toxocara canis]	3286	INV	PEG3	Toxocara canis	Paternally-expressed protein
A0.A1.NODE_20840_length_1123_cov_8.440341_g5426_i1	Anisakis	KHN79273.1	43.7	126	5.19e-26	3.7317173876165e-05	4.10528	Nr	KHN79273	Prostatic acid phosphatase [Toxocara canis]	745	INV	ACPP	Toxocara canis	Prostatic acid phosphatase
A2.transcripts:Locus_2526_Transcript_35_38_Confidence_0.212_Length_4170	Anisakis	KHN74579.1	54.6	1024	0.0	0.0252377196580129	4.09453	Nr	KHN74579	Putative serine protease K12H4.7, partial [Toxocara canis]	1094	INV	K12H4.7	Toxocara canis	putative serine protease K12H4.7
A0.A6.NODE_11759_length_1361_cov_6.030030_g6595_i0	Anisakis	OSG85581.1	60.0	160	1.61e-44	0.0204322378455181	4.08968	Nr	OSG85581	PG1 protein, partial [Bifidobacterium adolescentis]	173	BCT	NA	Bifidobacterium adolescentis	PG1 protein
A2.transcripts:Locus_857_Transcript_18_22_Confidence_0.333_Length_1899	Anisakis	A0A183V370	80.1	438	4.45e-263	0.000173754817112601	4.06889	TrEMBL	A0A183V370_TOXCA	NA	522	NA	TCNE_LOCUS15190	Toxocara canis	Diacylglycerol kinase
A0.A5.NODE_14336_length_1715_cov_77.020335_g6285_i0	Anisakis	A0A0M3I2K1	27.8	291	1.14e-23	0.00200549759271892	4.06544	TrEMBL	A0A0M3I2K1_ASCLU	NA	290	NA	NA	Ascaris lumbricoides	Glycine N-acyltransferase-like protein
A2.transcripts:Locus_2386_Transcript_6_16_Confidence_0.571_Length_1908	Anisakis	KHN81168.1	42.6	587	2.84e-124	0.017030158838077	4.06049	Nr	KHN81168	Putative defense protein [Toxocara canis]	591	INV	NA	Toxocara canis	putative defense protein
A2.transcripts:Locus_4652_Transcript_41_61_Confidence_0.045_Length_1018	Anisakis	KHN82658.1	55.5	236	8.37e-94	2.28827628443667e-05	4.0601	Nr	KHN82658	Putative serine protease pcp-1 [Toxocara canis]	410	INV	pcp-1	Toxocara canis	putative serine protease pcp-1
A2.transcripts:Locus_269_Transcript_37_58_Confidence_0.180_Length_2565	Anisakis	CDJ97188.1	51.3	485	7.14e-171	2.02614923237751e-05	4.05853	Nr	CDJ97188	Peptidase S28 domain containing protein [Haemonchus contortus]	503	INV	NA	Haemonchus contortus	Peptidase S28 domain containing protein
A1.A0.J3900884	Anisakis	A0A0M3JU73	94.0	333	2.96e-233	4.51962791332978e-05	4.05713	TrEMBL	A0A0M3JU73_ANISI	NA	651	NA	ASIM_LOCUS11179	Anisakis simplex	Phosphoenolpyruvate carboxykinase (GTP)
A0.A1.NODE_23207_length_944_cov_4.966933_g10826_i0	Anisakis	A0A0M3J2X1	79.1	201	1.47e-105	0.0331237454386827	4.05179	TrEMBL	A0A0M3J2X1_ANISI	NA	237	NA	ASIM_LOCUS1754	Anisakis simplex	Glucuronosyltransferase
A0.A2.NODE_5688_length_744_cov_71.317483_g2951_i2	Anisakis	KHN83246.1	63.0	135	7.44e-55	0.00899780666502873	4.04798	Nr	KHN83246	IgGFc-binding protein [Toxocara canis]	929	INV	FCGBP	Toxocara canis	IgGFc-binding protein
A2.transcripts:Locus_5917_Transcript_1_2_Confidence_0.750_Length_1194	Anisakis	KHN87310.1	89.7	263	6.82e-170	0.00334167389379844	4.04706	Nr	KHN87310	L-threonine 3-dehydrogenase, mitochondrial [Toxocara canis]	393	INV	Tdh	Toxocara canis	L-threonine 3-dehydrogenase, mitochondrial
A2.transcripts:Locus_1_Transcript_72569_107551_Confidence_0.000_Length_3114	Anisakis	KHN81463.1	55.2	981	0.0	0.00516446250171446	4.04483	Nr	KHN81463	Protein dispatched -like protein 1 [Toxocara canis]	912	INV	disp1	Toxocara canis	Protein dispatched -like protein 1
A2.transcripts:Locus_3_Transcript_17971_70181_Confidence_0.000_Length_2549	Anisakis	A0A183V4Q1	81.0	441	3.14e-262	0.00129535593310971	4.04321	TrEMBL	A0A183V4Q1_TOXCA	NA	450	NA	TCNE_LOCUS15721	Toxocara canis	Glutamate dehydrogenase
A2.transcripts:Locus_11885_Transcript_5_6_Confidence_0.300_Length_1490	Anisakis	XP_021954201.1	39.3	117	3.78e-19	5.33447970146237e-05	4.04168	Nr	XP_021954201	microtubule-associated proteins 1A/1B light chain 3A [Folsomia candida]	126	INV	LOC110850907	Folsomia candida	microtubule-associated proteins 1A/1B light chain 3A
A1.A0.J3706239	Anisakis	KHN73026.1	57.4	420	1.78e-160	3.76194916752249e-06	4.04116	Nr	KHN73026	Chondroadherin-like protein [Toxocara canis]	698	INV	CHADL	Toxocara canis	Chondroadherin-like protein
A0.A1.NODE_1188_length_5209_cov_143.814469_g639_i1	Anisakis	KHN81628.1	59.3	761	0.0	0.0062707818365131	4.03464	Nr	KHN81628	Neprilysin-2 [Toxocara canis]	1539	INV	nep-2	Toxocara canis	Neprilysin-2
A2.transcripts:Locus_732_Transcript_24_32_Confidence_0.265_Length_2357	Anisakis	KHN76800.1	41.3	697	1.74e-150	0.000136645675658526	4.03321	Nr	KHN76800	Putative tyrosinase-like protein tyr-3 [Toxocara canis]	708	INV	tyr-3	Toxocara canis	putative tyrosinase-like protein tyr-3
A2.transcripts:Locus_15786_Transcript_8_14_Confidence_0.421_Length_1380	Anisakis	CDJ90211.1	57.7	194	2.17e-73	0.000566413204842968	4.0316	Nr	CDJ90211	Protein C50F4.8 [Haemonchus contortus]	295	INV	NA	Haemonchus contortus	Protein C50F4.8
A2.transcripts:Locus_4652_Transcript_22_61_Confidence_0.011_Length_1406	Anisakis	EPB72571.1	53.8	314	1.29e-114	0.0065937426639796	4.01987	Nr	EPB72571	serine carboxypeptidase S28 [Ancylostoma ceylanicum]	327	INV	NA	Ancylostoma ceylanicum	serine carboxypeptidase S28
A0.A4.NODE_17230_length_1180_cov_5.998244_g8271_i0	Anisakis	A0A0M3KGA8	88.4	225	2.20e-136	2.49056110765203e-06	4.01264	TrEMBL	A0A0M3KGA8_ANISI	NA	255	NA	ASIM_LOCUS19407	Anisakis simplex	Metalloendopeptidase
A0.A1.NODE_28905_length_601_cov_2.385768_g15198_i0	Anisakis	A0A0M3J254	90.2	92	2.20e-57	2.85711783066514e-06	4.01143	TrEMBL	A0A0M3J254_ANISI	NA	90	NA	NA	Anisakis simplex	Phospholipase A(2)
A2.transcripts:Locus_1_Transcript_60261_107551_Confidence_0.000_Length_2976	Anisakis	A0A3P7FY91	83.8	37	2.12e-12	0.0221871523455611	4.00841	TrEMBL	A0A3P7FY91_TOXCA	NA	334	NA	TCNE_LOCUS10089	Toxocara canis	Cation_ATPase_C domain-containing protein
A2.transcripts:Locus_3_Transcript_54461_70181_Confidence_0.000_Length_1075	Anisakis	CRZ22689.1	58.8	245	1.31e-95	0.0164978434567596	4.00358	Nr	CRZ22689	BMA-CLC-2 [Brugia malayi]	250	INV	Bma-clc-2	Brugia malayi	BMA-CLC-2
A2.transcripts:Locus_2565_Transcript_30_46_Confidence_0.306_Length_1193	Anisakis	A0A0M3HVI0	61.6	250	1.29e-97	4.62298395871668e-08	3.99274	TrEMBL	A0A0M3HVI0_ASCLU	NA	477	NA	NA	Ascaris lumbricoides	MFS domain-containing protein
A0.A4.NODE_21176_length_816_cov_94.630968_g10473_i0	Anisakis	A0A0M3I2K1	44.0	84	1.68e-07	0.013163881657104	3.99129	TrEMBL	A0A0M3I2K1_ASCLU	NA	290	NA	NA	Ascaris lumbricoides	Glycine N-acyltransferase-like protein
A0.A5.NODE_8258_length_2399_cov_2367.786927_g3857_i0	Anisakis	A0A0M3K8R5	88.1	328	2.14e-189	0.0406849905207548	3.98118	TrEMBL	A0A0M3K8R5_ANISI	NA	423	NA	ASIM_LOCUS16763	Anisakis simplex	RNA helicase
A0.A5.NODE_23546_length_1061_cov_10.760314_g10045_i0	Anisakis	CRZ23058.1	42.9	226	2.42e-53	0.0179731581250379	3.96631	Nr	CRZ23058	Bm5106 [Brugia malayi]	250	INV	Bm5106	Brugia malayi	Bm5106
A0.A6.NODE_17102_length_834_cov_17.838509_g9702_i0	Anisakis	KHN87939.1	50.5	99	9.63e-23	0.0101202268290635	3.96373	Nr	KHN87939	Leucine-rich repeat protein 1 [Toxocara canis]	552	INV	LRR1	Toxocara canis	Leucine-rich repeat protein 1
A0.A6.NODE_4850_length_2466_cov_25.022569_g1280_i1	Anisakis	F1KT53	77.8	500	5.75e-266	5.80103717780189e-08	3.96191	TrEMBL	F1KT53_ASCSU	NA	935	NA	NA	Ascaris suum	Moesin/ezrin/radixin homolog 1
A1.A5.R3324863	Anisakis	OZC11735.1	60.9	161	7.01e-68	2.52609371213946e-05	3.9525	Nr	OZC11735	GDNF/GAS1 domain protein [Onchocerca flexuosa]	244	INV	NA	Onchocerca flexuosa	GDNF/GAS1 domain protein
A2.transcripts:Locus_4474_Transcript_12_33_Confidence_0.133_Length_896	Anisakis	VMP19955.1	86.0	114	1.70e-61	0.0111053459167663	3.95249	Nr	VMP19955	Uncharacterised protein [Streptococcus pneumoniae]	126	BCT	NA	Streptococcus pneumoniae	Uncharacterised protein
A0.A1.NODE_31889_length_490_cov_3.222222_g18096_i0	Anisakis	A0A0M3K3F6	100	162	1.44e-103	0.000221035609711459	3.93727	TrEMBL	A0A0M3K3F6_ANISI	NA	1071	NA	ASIM_LOCUS14904	Anisakis simplex	Chitin synthase
A2.transcripts:Locus_3390_Transcript_1_9_Confidence_0.167_Length_1117	Anisakis	A0A0M3K9Q9	72.6	343	1.22e-174	0.0031755514240295	3.93233	TrEMBL	A0A0M3K9Q9_ANISI	NA	560	NA	ASIM_LOCUS17107	Anisakis simplex	VWFA domain-containing protein
A1.A1.S1144692	Anisakis	KJH45449.1	63.3	60	6.84e-15	0.0334845693039222	3.92989	Nr	KJH45449	histidine acid phosphatase [Dictyocaulus viviparus]	245	INV	NA	Dictyocaulus viviparus	histidine acid phosphatase
A0.A5.NODE_39681_length_450_cov_56.626536_g21667_i0	Anisakis	A0A0M3K6G7	83.8	111	2.83e-59	0.0490202313945183	3.92841	TrEMBL	A0A0M3K6G7_ANISI	NA	244	NA	NA	Anisakis simplex	Evolutionarily conserved signaling intermediate in Toll pathway, mitochondrial
A0.A4.NODE_12346_length_1725_cov_116.894893_g6089_i0	Anisakis	A0A0M3I2K1	34.3	289	2.80e-39	4.52863294774663e-07	3.92723	TrEMBL	A0A0M3I2K1_ASCLU	NA	290	NA	NA	Ascaris lumbricoides	Glycine N-acyltransferase-like protein
A0.A5.NODE_20346_length_1262_cov_9.114848_g8624_i0	Anisakis	A0A0M3IY66	98.9	281	1.12e-203	0.0366296027332696	3.92534	TrEMBL	A0A0M3IY66_ANISI	NA	281	NA	ASIM_LOCUS97	Anisakis simplex	ZP domain-containing protein
A0.A2.NODE_5844_length_729_cov_21.341429_g3789_i1	Anisakis	A0A368EXN5	66.5	200	9.58e-91	0.023690703199402	3.92003	TrEMBL	A0A368EXN5_ANCCA	NA	312	NA	ANCCAN_29758	Ancylostoma caninum	Aquarius_N domain-containing protein
A0.A5.NODE_40793_length_428_cov_27.937662_g22727_i0	Anisakis	KFJ04251.1	66.4	113	6.44e-42	0.00752110991250278	3.91465	Nr	KFJ04251	PG1 protein [Bifidobacterium thermacidophilum subsp. thermacidophilum]	145	BCT	NA	Bifidobacterium thermacidophilum subsp. thermacidophilum	PG1 protein
A0.A0.NODE_14569_length_1147_cov_4.634615_g8128_i0	Anisakis	A0A0M3K3F6	99.5	381	3.90e-244	1.74982206910402e-06	3.90927	TrEMBL	A0A0M3K3F6_ANISI	NA	1071	NA	ASIM_LOCUS14904	Anisakis simplex	Chitin synthase
A2.transcripts:Locus_7513_Transcript_11_11_Confidence_0.118_Length_1271	Anisakis	KHN74730.1	54.0	274	6.52e-79	0.0451686597590148	3.8893	Nr	KHN74730	AN1-type zinc finger protein 1 [Toxocara canis]	244	INV	ZFAND1	Toxocara canis	AN1-type zinc finger protein 1
A2.transcripts:Locus_3_Transcript_50594_70181_Confidence_0.000_Length_695	Anisakis	CDP92575.1	55.6	90	1.38e-32	0.000551261566582043	3.87348	Nr	CDP92575	Bm1201 [Brugia malayi]	134	INV	Bm1201	Brugia malayi	Bm1201
A2.transcripts:Locus_5171_Transcript_7_8_Confidence_0.391_Length_1728	Anisakis	KHN72222.1	78.3	249	1.52e-121	0.0101286637553688	3.87321	Nr	KHN72222	Calcium/calmodulin-dependent protein kinase kinase 2 [Toxocara canis]	463	INV	Camkk2	Toxocara canis	Calcium/calmodulin-dependent protein kinase kinase 2
A2.transcripts:Locus_16007_Transcript_17_18_Confidence_0.167_Length_486	Anisakis	A0A0M3K097	94.6	37	2.10e-11	0.0168820035790124	3.87044	TrEMBL	A0A0M3K097_ANISI	NA	502	NA	ASIM_LOCUS13653	Anisakis simplex	Flavin-containing monooxygenase
A2.transcripts:Locus_12345_Transcript_4_4_Confidence_0.111_Length_1884	Anisakis	KHN89098.1	66.0	573	3.21e-247	0.000397887337560541	3.84	Nr	KHN89098	Transmembrane protein -like protein [Toxocara canis]	570	INV	NA	Toxocara canis	Transmembrane protein -like protein
A2.transcripts:Locus_4647_Transcript_4_8_Confidence_0.476_Length_1561	Anisakis	A0A0M3K555	97.7	44	2.72e-18	8.29465287183217e-19	3.83015	TrEMBL	A0A0M3K555_ANISI	NA	292	NA	ASIM_LOCUS15503	Anisakis simplex	Col_cuticle_N domain-containing protein
A2.transcripts:Locus_1094_Transcript_5_19_Confidence_0.689_Length_3877	Anisakis	KHN81463.1	66.3	683	1.44e-307	0.0146143755512274	3.82386	Nr	KHN81463	Protein dispatched -like protein 1 [Toxocara canis]	912	INV	disp1	Toxocara canis	Protein dispatched -like protein 1
A0.A1.NODE_27530_length_669_cov_78.353821_g13972_i0	Anisakis	KHN80163.1	58.3	72	6.68e-17	0.00658817978102749	3.82294	Nr	KHN80163	Cecropin-P1 [Toxocara canis]	82	INV	ASCEC-1	Toxocara canis	Cecropin-P1
A2.transcripts:Locus_5969_Transcript_5_28_Confidence_0.128_Length_901	Anisakis	A0A0M3K9Q9	84.0	288	8.01e-158	0.0128871793463312	3.80717	TrEMBL	A0A0M3K9Q9_ANISI	NA	560	NA	ASIM_LOCUS17107	Anisakis simplex	VWFA domain-containing protein
A0.A5.NODE_32033_length_664_cov_6.371981_g15045_i0	Anisakis	A0A0M3KI08	97.9	96	4.34e-56	0.0251981520333646	3.80431	TrEMBL	A0A0M3KI08_ANISI	NA	204	NA	ASIM_LOCUS20007	Anisakis simplex	VWFA domain-containing protein
A2.transcripts:Locus_8371_Transcript_5_5_Confidence_0.300_Length_422	Anisakis	A0A0M3J135	90.3	155	3.46e-91	0.0278816965065927	3.80261	TrEMBL	A0A0M3J135_ANISI	NA	410	NA	ASIM_LOCUS1118	Anisakis simplex	Beta-glucuronidase
A2.transcripts:Locus_1_Transcript_76771_107551_Confidence_0.000_Length_2915	Anisakis	KHN88925.1	80.6	506	8.50e-290	0.00288654691230869	3.80205	Nr	KHN88925	Long-chain fatty acid transport protein 4 [Toxocara canis]	620	INV	Slc27a4	Toxocara canis	Long-chain fatty acid transport protein 4
A2.transcripts:Locus_19467_Transcript_28_28_Confidence_0.059_Length_632	Anisakis	CTP81731.1	47.9	142	8.95e-19	0.00140388070073659	3.79576	Nr	CTP81731	Bm2488 [Brugia malayi]	413	INV	Bm2488	Brugia malayi	Bm2488
A2.transcripts:Locus_2433_Transcript_16_35_Confidence_0.321_Length_1087	Anisakis	KHN72139.1	61.8	136	3.16e-48	5.33447970146237e-05	3.79006	Nr	KHN72139	Transmembrane protein 53 [Toxocara canis]	307	INV	TMEM53	Toxocara canis	Transmembrane protein 53
A2.transcripts:Locus_3_Transcript_50053_70181_Confidence_0.000_Length_1658	Anisakis	A0A0M3K4H9	77.3	432	3.84e-245	0.000144784059795978	3.76796	TrEMBL	A0A0M3K4H9_ANISI	NA	424	NA	ASIM_LOCUS15277	Anisakis simplex	Metallophos domain-containing protein
A0.A2.NODE_1180_length_1646_cov_581.062461_g965_i0	Anisakis	A0A0M3JU73	99.1	225	1.24e-161	0.00129233152667985	3.74746	TrEMBL	A0A0M3JU73_ANISI	NA	651	NA	ASIM_LOCUS11179	Anisakis simplex	Phosphoenolpyruvate carboxykinase (GTP)
A0.A1.NODE_16297_length_1519_cov_82.124656_g4282_i7	Anisakis	KHN85848.1	43.4	226	6.50e-47	3.74678326465305e-07	3.74133	Nr	KHN85848	Hemicentin-1 [Toxocara canis]	1056	INV	HMCN1	Toxocara canis	Hemicentin-1
A2.transcripts:Locus_6202_Transcript_23_35_Confidence_0.310_Length_1969	Anisakis	KHN83246.1	55.0	606	1.15e-247	4.76647232079852e-05	3.73682	Nr	KHN83246	IgGFc-binding protein [Toxocara canis]	929	INV	FCGBP	Toxocara canis	IgGFc-binding protein
A2.transcripts:Locus_14372_Transcript_1_2_Confidence_0.778_Length_313	Anisakis	A0A0M3JUG5	73.6	87	4.70e-37	0.0451548387744218	3.73066	TrEMBL	A0A0M3JUG5_ANISI	NA	208	NA	ASIM_LOCUS11284	Anisakis simplex	BPTI/Kunitz inhibitor domain-containing protein
A0.A5.NODE_2064_length_4098_cov_29.290012_g1054_i0	Anisakis	KHN82102.1	60.3	189	1.07e-59	0.000716849098042903	3.72592	Nr	KHN82102	Paternally-expressed protein [Toxocara canis]	3286	INV	PEG3	Toxocara canis	Paternally-expressed protein
A2.transcripts:Locus_19860_Transcript_1_1_Confidence_0.000_Length_202	Anisakis	A0A0M3JK46	79.5	44	1.82e-14	0.0062674736701437	3.70909	TrEMBL	A0A0M3JK46_ANISI	NA	206	NA	ASIM_LOCUS7779	Anisakis simplex	HTH CENPB-type domain-containing protein
A2.transcripts:Locus_800_Transcript_68_112_Confidence_0.187_Length_2945	Anisakis	XP_001896601.1	67.2	634	7.29e-289	0.0198701311516082	3.70821	Nr	XP_001896601	Patched family protein [Brugia malayi]	797	INV	NA	Brugia malayi	Patched family protein
A2.transcripts:Locus_19698_Transcript_10_37_Confidence_0.302_Length_1336	Anisakis	A0A0M3JU73	100	293	4.05e-217	0.000497516567788056	3.6925	TrEMBL	A0A0M3JU73_ANISI	NA	651	NA	ASIM_LOCUS11179	Anisakis simplex	Phosphoenolpyruvate carboxykinase (GTP)
A2.transcripts:Locus_1198_Transcript_3_14_Confidence_0.474_Length_3465	Anisakis	A0A0B2VFD6	76.8	246	4.82e-131	0.00150180252792951	3.68919	TrEMBL	A0A0B2VFD6_TOXCA	NA	450	NA	Tcan_13196	Toxocara canis	Neur_chan_LBD domain-containing protein
A2.transcripts:Locus_1394_Transcript_3_23_Confidence_0.114_Length_345	Anisakis	A1IKL3.1	62.2	74	3.57e-31	0.0336354222308741	3.68277	Swiss-Prot	ANIS6_ANISI	RecName: Full=Chymotrypsin inhibitor Ani s 6; AltName: Allergen=Ani s 6; Flags: Precursor	84	INV	NA	Anisakis simplex	Chymotrypsin inhibitor Ani s 6
A1.A5.R3390979	Anisakis	A0A0M3K7D8	70.5	363	3.96e-171	0.0238764537850049	3.67209	TrEMBL	A0A0M3K7D8_ANISI	NA	361	NA	ASIM_LOCUS16286	Anisakis simplex	Thyroglobulin type-1 domain-containing protein
A2.transcripts:Locus_2902_Transcript_10_10_Confidence_0.083_Length_1162	Anisakis	CDJ84116.1	45.0	169	5.99e-39	0.00986188914166647	3.66827	Nr	CDJ84116	Protein C17F4.7 [Haemonchus contortus]	185	INV	NA	Haemonchus contortus	Protein C17F4.7
A0.A5.NODE_28409_length_809_cov_5.172324_g11378_i1	Anisakis	A0A0M3J135	87.2	304	1.40e-184	0.000747582119777872	3.65847	TrEMBL	A0A0M3J135_ANISI	NA	410	NA	ASIM_LOCUS1118	Anisakis simplex	Beta-glucuronidase
A2.transcripts:Locus_3201_Transcript_14_49_Confidence_0.291_Length_3777	Anisakis	KHN82707.1	72.9	255	1.78e-115	0.00616610453312098	3.65764	Nr	KHN82707	Phospholipase D3 [Toxocara canis]	529	INV	pld3	Toxocara canis	Phospholipase D3
A2.transcripts:Locus_12825_Transcript_7_13_Confidence_0.630_Length_675	Anisakis	A0A0M3JUG5	88.5	208	2.36e-135	3.89592571182629e-08	3.64774	TrEMBL	A0A0M3JUG5_ANISI	NA	208	NA	ASIM_LOCUS11284	Anisakis simplex	BPTI/Kunitz inhibitor domain-containing protein
A2.transcripts:Locus_1470_Transcript_17_20_Confidence_0.400_Length_1226	Anisakis	KHN87939.1	41.2	68	1.79e-08	0.0071403768619255	3.64461	Nr	KHN87939	Leucine-rich repeat protein 1 [Toxocara canis]	552	INV	LRR1	Toxocara canis	Leucine-rich repeat protein 1
A2.transcripts:Locus_3101_Transcript_7_21_Confidence_0.500_Length_1968	Anisakis	KHN88251.1	57.1	266	1.05e-94	0.0479209039435447	3.64167	Nr	KHN88251	Methyltransferase-like protein 13 [Toxocara canis]	365	INV	METTL13	Toxocara canis	Methyltransferase-like protein 13
A1.A4.R2452713	Anisakis	KHN86832.1	48.6	107	4.16e-16	0.0364741289615892	3.64166	Nr	KHN86832	Ligand-gated ion channel 50 [Toxocara canis]	570	INV	lgc-50	Toxocara canis	Ligand-gated ion channel 50
A0.A1.NODE_21622_length_1062_cov_3.641206_g9904_i0	Anisakis	KHN74592.1	59.7	231	5.60e-85	0.0280610451153189	3.64165	Nr	KHN74592	Putative serine protease K12H4.7, partial [Toxocara canis]	1661	INV	K12H4.7	Toxocara canis	putative serine protease K12H4.7
A2.transcripts:Locus_1_Transcript_97974_107551_Confidence_0.000_Length_2322	Anisakis	KHN75153.1	95.3	170	1.79e-102	0.000614218085465619	3.63055	Nr	KHN75153	60S ribosomal protein L11 [Toxocara canis]	204	INV	rpl-11.1	Toxocara canis	60S ribosomal protein L11
A0.A2.NODE_170_length_3060_cov_200.716925_g135_i0	Anisakis	A0A0M3IZM4	88.5	667	0.0	0.0010716463281379	3.62028	TrEMBL	A0A0M3IZM4_ANISI	NA	663	NA	ASIM_LOCUS607	Anisakis simplex	Carboxypeptidase
A2.transcripts:Locus_4203_Transcript_16_28_Confidence_0.284_Length_762	Anisakis	A0A0M3IZM4	85.2	271	3.41e-112	0.00105078293336771	3.61917	TrEMBL	A0A0M3IZM4_ANISI	NA	663	NA	ASIM_LOCUS607	Anisakis simplex	Carboxypeptidase
A0.A1.NODE_14012_length_1754_cov_15.796680_g6497_i0	Anisakis	A0A0M3I2K1	41.4	174	2.17e-25	0.00245245253539673	3.6139	TrEMBL	A0A0M3I2K1_ASCLU	NA	290	NA	NA	Ascaris lumbricoides	Glycine N-acyltransferase-like protein
A0.A5.NODE_7388_length_2534_cov_34.951425_g3490_i0	Anisakis	A0A0B2VXG2	82.7	503	1.07e-309	0.00476141061604919	3.61227	TrEMBL	A0A0B2VXG2_TOXCA	NA	503	NA	Gdh	Toxocara canis	Glutamate dehydrogenase
A2.transcripts:Locus_1355_Transcript_2_4_Confidence_0.333_Length_2525	Anisakis	F1KYE6	72.9	505	2.13e-267	0.0413631609772792	3.61018	TrEMBL	F1KYE6_ASCSU	DNA polymerase II subunit 2	513	NA	NA	Ascaris suum	DNA polymerase epsilon subunit
A2.transcripts:Locus_17554_Transcript_1_4_Confidence_0.667_Length_920	Anisakis	A0A0M3IYR5	74.9	203	1.21e-87	0.00246208915182786	3.60563	TrEMBL	A0A0M3IYR5_ANISI	NA	289	NA	ASIM_LOCUS298	Anisakis simplex	Glyco_hydro_38C domain-containing protein
A2.transcripts:Locus_20754_Transcript_6_6_Confidence_0.421_Length_1732	Anisakis	KHN73107.1	52.8	583	1.13e-145	8.79878000417883e-05	3.58995	Nr	KHN73107	Collagen alpha-6(VI) chain [Toxocara canis]	2366	INV	COL6A6	Toxocara canis	Collagen alpha-6(VI) chain
A2.transcripts:Locus_4737_Transcript_4_12_Confidence_0.250_Length_418	Anisakis	F1KW74	61.9	63	2.03e-18	0.000569677160224421	3.58836	TrEMBL	F1KW74_ASCSU	NA	777	NA	NA	Ascaris suum	Aminopeptidase
A2.transcripts:Locus_3254_Transcript_5_5_Confidence_0.125_Length_817	Anisakis	KHN73306.1	80.2	121	7.69e-61	0.032891059840417	3.58772	Nr	KHN73306	Pseudouridine-5'-monophosphatase [Toxocara canis]	337	INV	HDHD1	Toxocara canis	Pseudouridine-5'-monophosphatase
A2.transcripts:Locus_729_Transcript_74_99_Confidence_0.182_Length_2922	Anisakis	KHN72673.1	82.3	237	6.54e-130	0.0410380708994211	3.58494	Nr	KHN72673	Cytochrome P450 4C1 [Toxocara canis]	538	INV	CYP4C1	Toxocara canis	Cytochrome P450 4C1
A0.A6.NODE_6895_length_2053_cov_6.374506_g4018_i0	Anisakis	A0A6G0UQW5	53.8	571	8.38e-189	0.00350897718794503	3.57117	TrEMBL	A0A6G0UQW5_9BILA	NA	481	NA	FO519_006115	Halicephalobus sp. NKZ332	MFS domain-containing protein
A2.transcripts:Locus_3_Transcript_8984_70181_Confidence_0.000_Length_2184	Anisakis	A0A0B2VA51	72.5	109	4.45e-33	0.00873815817732817	3.57013	TrEMBL	A0A0B2VA51_TOXCA	NA	492	NA	Tcan_02879	Toxocara canis	G_PROTEIN_RECEP_F1_2 domain-containing protein
A2.transcripts:Locus_3_Transcript_55577_70181_Confidence_0.000_Length_1442	Anisakis	A0A0M3K555	100	55	5.45e-23	2.53329460243106e-07	3.56975	TrEMBL	A0A0M3K555_ANISI	NA	292	NA	ASIM_LOCUS15503	Anisakis simplex	Col_cuticle_N domain-containing protein
A2.transcripts:Locus_14413_Transcript_10_13_Confidence_0.385_Length_1834	Anisakis	F1L2Y6	81.3	359	2.82e-218	0.0372799188475471	3.56342	TrEMBL	F1L2Y6_ASCSU	NA	420	NA	NA	Ascaris suum	Zinc metalloproteinase
A0.A0.NODE_21969_length_591_cov_2.300373_g13743_i0	Anisakis	A0A016UNC4	47.7	197	2.32e-42	0.000184285780848034	3.56153	TrEMBL	A0A016UNC4_9BILA	NA	1621	NA	Acey_s0033.g2779	Ancylostoma ceylanicum	Chitin synthase
A2.transcripts:Locus_278_Transcript_224_468_Confidence_0.011_Length_1451	Anisakis	CDJ93557.1	50.6	79	1.50e-11	0.036017770066322	3.55481	Nr	CDJ93557	Protein F46F2.5 [Haemonchus contortus]	371	INV	NA	Haemonchus contortus	Protein F46F2.5
A2.transcripts:Locus_1967_Transcript_2_4_Confidence_0.667_Length_2246	Anisakis	A0A0M3K8R4	98.2	398	3.22e-269	0.0413605124820885	3.55376	TrEMBL	A0A0M3K8R4_ANISI	NA	781	NA	ASIM_LOCUS16762	Anisakis simplex	DNA polymerase epsilon catalytic subunit
A0.A5.NODE_13763_length_1763_cov_604.600000_g2729_i1	Anisakis	CAA60048.1	50.5	333	8.81e-91	1.78338436201966e-09	3.5514	Nr	CAA60048	cytoplasmic intermediate filament protein [Ascaris lumbricoides]	612	INV	IF D1	Ascaris lumbricoides	cytoplasmic intermediate filament protein
A0.A0.NODE_34198_length_305_cov_5.020000_g25898_i0	Anisakis	XP_013297421.1	52.6	78	1.79e-12	0.0197443517317838	3.54598	Nr	XP_013297421	EGF-like domain protein [Necator americanus]	3066	INV	NA	Necator americanus	EGF-like domain protein
A2.transcripts:Locus_21946_Transcript_14_17_Confidence_0.444_Length_4236	Anisakis	KHN76515.1	64.7	1362	0.0	0.00119329945206163	3.54155	Nr	KHN76515	Thyrotropin-releasing hormone-degrading ectoenzyme [Toxocara canis]	1875	INV	TRHDE	Toxocara canis	Thyrotropin-releasing hormone-degrading ectoenzyme
A1.A5.R3311615	Anisakis	BAJ78223.1	90.2	193	3.41e-124	0.000104052972273842	3.53809	Nr	BAJ78223	Ani s 12 allergen precursor [Anisakis simplex]	295	INV	Anis12	Anisakis simplex	Ani s 12 allergen precursor
A0.A1.NODE_8945_length_2394_cov_134.187795_g4307_i0	Anisakis	CDJ97188.1	48.1	486	7.36e-162	0.000318711671636184	3.53213	Nr	CDJ97188	Peptidase S28 domain containing protein [Haemonchus contortus]	503	INV	NA	Haemonchus contortus	Peptidase S28 domain containing protein
A2.transcripts:Locus_1265_Transcript_66_67_Confidence_0.218_Length_1672	Anisakis	RCN50842.1	45.7	221	1.77e-52	0.00227529485371587	3.5313	Nr	RCN50842	serine carboxypeptidase S28 [Ancylostoma caninum]	554	INV	NA	Ancylostoma caninum	serine carboxypeptidase S28
A0.A0.NODE_11907_length_1441_cov_9.978355_g6529_i0	Anisakis	MBI1713597.1	61.9	168	7.42e-56	0.0185390221932402	3.52943	Nr	MBI1713597	permease, partial [Lactobacillus crispatus]	168	BCT	NA	Lactobacillus crispatus	permease
A2.transcripts:Locus_427_Transcript_40_51_Confidence_0.175_Length_1178	Anisakis	A0A0M3JTZ9	95.3	149	1.52e-99	0.000822879307040445	3.5288	TrEMBL	A0A0M3JTZ9_ANISI	NA	215	NA	ASIM_LOCUS11097	Anisakis simplex	ShKT domain-containing protein
A1.A1.R3304810	Anisakis	A0A0M3JVS0	94.9	336	3.50e-174	2.62242561331742e-06	3.52799	TrEMBL	A0A0M3JVS0_ANISI	RNA-binding protein 42	336	NA	ASIM_LOCUS11798	Anisakis simplex	RNA-binding motif protein 42
A2.transcripts:Locus_5845_Transcript_6_16_Confidence_0.235_Length_2781	Anisakis	KHN88925.1	80.1	518	6.77e-298	7.37678934964689e-06	3.52475	Nr	KHN88925	Long-chain fatty acid transport protein 4 [Toxocara canis]	620	INV	Slc27a4	Toxocara canis	Long-chain fatty acid transport protein 4
A0.A1.NODE_20188_length_1176_cov_10.326420_g9157_i0	Anisakis	KHN78009.1	68.0	344	1.02e-160	4.24919439650142e-06	3.52389	Nr	KHN78009	ADAM family mig-17 [Toxocara canis]	453	INV	mig-17	Toxocara canis	ADAM family mig-17
A2.transcripts:Locus_1_Transcript_42833_107551_Confidence_0.000_Length_1298	Anisakis	A0A0M3I2K1	37.4	147	1.12e-16	1.22079173171651e-05	3.52339	TrEMBL	A0A0M3I2K1_ASCLU	NA	290	NA	NA	Ascaris lumbricoides	Glycine N-acyltransferase-like protein
A2.transcripts:Locus_7735_Transcript_5_12_Confidence_0.467_Length_1351	Anisakis	KHN88251.1	56.6	244	1.10e-84	0.00152033143691999	3.49851	Nr	KHN88251	Methyltransferase-like protein 13 [Toxocara canis]	365	INV	METTL13	Toxocara canis	Methyltransferase-like protein 13
A1.A5.S3352959	Anisakis	AGC60028.1	65.3	72	2.24e-24	1.55440787909053e-08	3.49395	Nr	AGC60028	Ani s 12 allergen [Anisakis pegreffii]	264	INV	NA	Anisakis pegreffii	Ani s 12 allergen
A0.A5.NODE_7692_length_2485_cov_12.715397_g3349_i1	Anisakis	KHN76515.1	62.2	810	0.0	0.010614319100373	3.49112	Nr	KHN76515	Thyrotropin-releasing hormone-degrading ectoenzyme [Toxocara canis]	1875	INV	TRHDE	Toxocara canis	Thyrotropin-releasing hormone-degrading ectoenzyme
A2.transcripts:Locus_5969_Transcript_17_28_Confidence_0.436_Length_1542	Anisakis	A0A0M3K9Q9	64.9	513	2.42e-224	0.00206647519983775	3.4903	TrEMBL	A0A0M3K9Q9_ANISI	NA	560	NA	ASIM_LOCUS17107	Anisakis simplex	VWFA domain-containing protein
A0.A0.NODE_22288_length_575_cov_886.930769_g14043_i0	Anisakis	A0A0M3J8C6	96.2	78	2.53e-46	0.00620717378782334	3.48848	TrEMBL	A0A0M3J8C6_ANISI	NA	143	NA	ASIM_LOCUS3660	Anisakis simplex	ShKT domain-containing protein
A0.A2.NODE_5078_length_803_cov_121.214470_g2697_i2	Anisakis	A0A0M3K4H9	69.3	114	1.32e-41	1.47724404794038e-08	3.48443	TrEMBL	A0A0M3K4H9_ANISI	NA	424	NA	ASIM_LOCUS15277	Anisakis simplex	Metallophos domain-containing protein
A2.transcripts:Locus_1_Transcript_76759_107551_Confidence_0.000_Length_491	Anisakis	KHN88925.1	65.8	73	3.23e-22	0.00531492567469754	3.48017	Nr	KHN88925	Long-chain fatty acid transport protein 4 [Toxocara canis]	620	INV	Slc27a4	Toxocara canis	Long-chain fatty acid transport protein 4
A1.A2.R682856	Anisakis	A0A0M3I2K1	33.3	288	7.61e-36	0.00468410327281138	3.455	TrEMBL	A0A0M3I2K1_ASCLU	NA	290	NA	NA	Ascaris lumbricoides	Glycine N-acyltransferase-like protein
A2.transcripts:Locus_1094_Transcript_6_19_Confidence_0.189_Length_3719	Anisakis	A0A0M3I681	63.3	881	0.0	0.0010320969724421	3.44814	TrEMBL	A0A0M3I681_ASCLU	NA	818	NA	NA	Ascaris lumbricoides	SSD domain-containing protein
A2.transcripts:Locus_3023_Transcript_39_46_Confidence_0.470_Length_2716	Anisakis	KHN83852.1	55.8	319	1.72e-106	1.86093388670076e-12	3.43938	Nr	KHN83852	Short-chain dehydrogenase/reductase family 9C member 7 [Toxocara canis]	448	INV	SDR9C7	Toxocara canis	Short-chain dehydrogenase/reductase family 9C member 7
A0.A1.NODE_23383_length_932_cov_10.705202_g10919_i0	Anisakis	A0A0M3IZX3	69.6	46	4.67e-09	0.00847850225185085	3.43509	TrEMBL	A0A0M3IZX3_ANISI	NA	1211	NA	ASIM_LOCUS706	Anisakis simplex	DUF5641 domain-containing protein
A2.transcripts:Locus_3844_Transcript_7_12_Confidence_0.444_Length_2127	Anisakis	A0A0M3K079	99.0	191	1.02e-118	0.0013587410041549	3.42926	TrEMBL	A0A0M3K079_ANISI	NA	343	NA	ASIM_LOCUS13635	Anisakis simplex	MFS domain-containing protein
A0.A5.NODE_10251_length_2141_cov_14.586749_g4658_i0	Anisakis	KHN81970.1	66.1	180	2.30e-63	0.00573714565482051	3.42408	Nr	KHN81970	Major facilitator superfamily domain-containing protein 8 [Toxocara canis]	543	INV	mfsd8	Toxocara canis	Major facilitator superfamily domain-containing protein 8
A0.A5.NODE_18174_length_1410_cov_7.498171_g7743_i0	Anisakis	F1L0J7	80.2	308	8.39e-177	0.000327147125862641	3.41757	TrEMBL	F1L0J7_ASCSU	NA	658	NA	NA	Ascaris suum	Beta-glucuronidase
A2.transcripts:Locus_40436_Transcript_1_5_Confidence_0.583_Length_1678	Anisakis	A0A0B2W4H2	77.0	517	4.73e-299	0.000799466153311739	3.41311	TrEMBL	A0A0B2W4H2_TOXCA	Acylamino-acid-releasing enzyme	718	NA	dpf-6	Toxocara canis	Acyl-peptide hydrolase
A0.A5.NODE_10880_length_2067_cov_31.518281_g4903_i0	Anisakis	A0A0B2W2N2	86.4	220	4.29e-114	0.0123765306210106	3.41214	TrEMBL	A0A0B2W2N2_TOXCA	NA	589	NA	SLC28A3	Toxocara canis	Sodium/nucleoside cotransporter
A2.transcripts:Locus_3066_Transcript_40_49_Confidence_0.300_Length_2017	Anisakis	A0A0M3I2K1	37.7	175	4.85e-22	0.0378503217135446	3.40632	TrEMBL	A0A0M3I2K1_ASCLU	NA	290	NA	NA	Ascaris lumbricoides	Glycine N-acyltransferase-like protein
A0.A1.NODE_15375_length_1613_cov_72.869340_g7062_i0	Anisakis	A0A0M3I2K1	28.3	293	2.16e-25	0.0206949646267968	3.39468	TrEMBL	A0A0M3I2K1_ASCLU	NA	290	NA	NA	Ascaris lumbricoides	Glycine N-acyltransferase-like protein
A2.transcripts:Locus_3_Transcript_57031_70181_Confidence_0.001_Length_6385	Anisakis	KHN82102.1	60.3	189	4.38e-59	0.00566607386558271	3.39382	Nr	KHN82102	Paternally-expressed protein [Toxocara canis]	3286	INV	PEG3	Toxocara canis	Paternally-expressed protein
A1.A2.S329252	Anisakis	KHN72428.1	72.3	65	2.75e-26	0.00125533308066693	3.38099	Nr	KHN72428	DNA damage-regulated autophagy modulator protein 1 [Toxocara canis]	307	INV	DRAM1	Toxocara canis	DNA damage-regulated autophagy modulator protein 1
A0.A1.NODE_4524_length_3324_cov_278.078293_g256_i3	Anisakis	KHN76517.1	47.3	711	1.85e-207	2.15837405392249e-06	3.36653	Nr	KHN76517	Thyrotropin-releasing hormone-degrading ectoenzyme [Toxocara canis]	1889	INV	Trhde	Toxocara canis	Thyrotropin-releasing hormone-degrading ectoenzyme
A0.A5.NODE_2765_length_3748_cov_33.780567_g1402_i1	Anisakis	A0A0M3I681	63.7	881	0.0	0.0297321305288949	3.36272	TrEMBL	A0A0M3I681_ASCLU	NA	818	NA	NA	Ascaris lumbricoides	SSD domain-containing protein
A2.transcripts:Locus_3999_Transcript_4_22_Confidence_0.003_Length_932	Anisakis	KHN74792.1	69.4	180	7.90e-87	0.00635728755493642	3.34578	Nr	KHN74792	Gelsolin-like protein 1 [Toxocara canis]	472	INV	gsnl-1	Toxocara canis	Gelsolin-like protein 1
A0.A1.NODE_5799_length_2972_cov_752.708778_g2644_i2	Anisakis	KHN80505.1	72.3	675	0.0	5.13592631976541e-06	3.34007	Nr	KHN80505	Neprilysin-2 [Toxocara canis]	778	INV	nep-2	Toxocara canis	Neprilysin-2
A0.A1.NODE_24374_length_863_cov_4.977387_g11565_i0	Anisakis	A0A0M3K0L1	72.0	186	2.56e-80	2.36201104559634e-09	3.33878	TrEMBL	A0A0M3K0L1_ANISI	NA	135	NA	ASIM_LOCUS13778	Anisakis simplex	RING-type domain-containing protein
A2.transcripts:Locus_5365_Transcript_32_50_Confidence_0.512_Length_3759	Anisakis	KHN74592.1	60.6	1095	0.0	0.000169317203287206	3.3371	Nr	KHN74592	Putative serine protease K12H4.7, partial [Toxocara canis]	1661	INV	K12H4.7	Toxocara canis	putative serine protease K12H4.7
A1.A1.R3328187	Anisakis	A0A0N5AQD9	44.9	321	4.31e-92	3.66967629521198e-08	3.32398	TrEMBL	A0A0N5AQD9_9BILA	NA	392	NA	NA	Syphacia muris	Protein kinase domain-containing protein
A2.transcripts:Locus_1877_Transcript_3_5_Confidence_0.429_Length_2164	Anisakis	KAF8372895.1	70.5	579	5.95e-204	0.00367318456524542	3.32371	Nr	KAF8372895	lron-2, partial [Pristionchus pacificus]	613	INV	NA	Pristionchus pacificus	lron-2
A0.A6.NODE_3678_length_2805_cov_30.978746_g2261_i0	Anisakis	A0A0M3IYS1	45.7	633	3.45e-144	0.022445008105368	3.31294	TrEMBL	A0A0M3IYS1_ANISI	NA	543	NA	ASIM_LOCUS304	Anisakis simplex	Metalloendopeptidase
A2.transcripts:Locus_2745_Transcript_9_19_Confidence_0.500_Length_2034	Anisakis	KHN72139.1	71.4	220	1.79e-103	0.0156336401847844	3.30626	Nr	KHN72139	Transmembrane protein 53 [Toxocara canis]	307	INV	TMEM53	Toxocara canis	Transmembrane protein 53
A2.transcripts:Locus_1369_Transcript_1_1_Confidence_0.000_Length_1428	Anisakis	A0A0M3K2X9	98.2	112	1.36e-64	0.00614602392497911	3.30151	TrEMBL	A0A0M3K2X9_ANISI	NA	121	NA	ASIM_LOCUS14715	Anisakis simplex	J domain-containing protein
A2.transcripts:Locus_415_Transcript_2_15_Confidence_0.174_Length_899	Anisakis	KHN82658.1	61.3	111	9.70e-42	2.66016365532235e-06	3.29779	Nr	KHN82658	Putative serine protease pcp-1 [Toxocara canis]	410	INV	pcp-1	Toxocara canis	putative serine protease pcp-1
A2.transcripts:Locus_158_Transcript_39_40_Confidence_0.147_Length_3065	Anisakis	CDJ85288.1	59.5	920	0.0	0.00819128780283608	3.27973	Nr	CDJ85288	Glutamate phenylalanine leucine valine dehydrogenase domain containing protein [Haemonchus contortus]	828	INV	NA	Haemonchus contortus	Glutamate phenylalanine leucine valine dehydrogenase domain containing protein
A2.transcripts:Locus_19467_Transcript_15_28_Confidence_0.206_Length_2249	Anisakis	CTP81731.1	48.1	439	1.22e-83	0.000306282921715512	3.27685	Nr	CTP81731	Bm2488 [Brugia malayi]	413	INV	Bm2488	Brugia malayi	Bm2488
A2.transcripts:Locus_3520_Transcript_2_2_Confidence_0.000_Length_1026	Anisakis	BAJ78223.1	85.3	143	1.53e-80	6.85956765716325e-05	3.27063	Nr	BAJ78223	Ani s 12 allergen precursor [Anisakis simplex]	295	INV	Anis12	Anisakis simplex	Ani s 12 allergen precursor
A1.A2.R684116	Anisakis	KHN87939.1	46.9	113	2.00e-23	0.0370185933522327	3.26728	Nr	KHN87939	Leucine-rich repeat protein 1 [Toxocara canis]	552	INV	LRR1	Toxocara canis	Leucine-rich repeat protein 1
A2.transcripts:Locus_656_Transcript_173_209_Confidence_0.035_Length_2205	Anisakis	KHN83852.1	64.5	76	2.90e-20	0.00212102629669251	3.26617	Nr	KHN83852	Short-chain dehydrogenase/reductase family 9C member 7 [Toxocara canis]	448	INV	SDR9C7	Toxocara canis	Short-chain dehydrogenase/reductase family 9C member 7
A0.A1.NODE_22340_length_1010_cov_2.768823_g10302_i0	Anisakis	A0A0B2V9R3	58.8	255	1.19e-83	0.0300062796035498	3.25784	TrEMBL	A0A0B2V9R3_TOXCA	NA	1674	NA	SHL2	Toxocara canis	RNA-directed RNA polymerase
A2.transcripts:Locus_3186_Transcript_1_2_Confidence_0.750_Length_1037	Anisakis	A0A0M3JV53	91.9	123	8.70e-71	1.70011247466597e-05	3.25644	TrEMBL	A0A0M3JV53_ANISI	NA	128	NA	ASIM_LOCUS11559	Anisakis simplex	SHSP domain-containing protein
A2.transcripts:Locus_62_Transcript_144_181_Confidence_0.098_Length_1488	Anisakis	A0A3P7LC50	51.2	387	1.13e-130	7.99846755384655e-08	3.24226	TrEMBL	A0A3P7LC50_STRVU	NA	517	NA	SVUK_LOCUS11860	Strongylus vulgaris	Glyco_18 domain-containing protein
A2.transcripts:Locus_570_Transcript_50_57_Confidence_0.174_Length_4923	Anisakis	A0A0M3K7E1	77.4	986	0.0	0.000342722147719755	3.24053	TrEMBL	A0A0M3K7E1_ANISI	NA	862	NA	NA	Anisakis simplex	Aminopeptidase
A0.A1.NODE_15358_length_1614_cov_96.074984_g7054_i0	Anisakis	KHN74592.1	56.1	597	1.75e-212	0.0345280076377868	3.23724	Nr	KHN74592	Putative serine protease K12H4.7, partial [Toxocara canis]	1661	INV	K12H4.7	Toxocara canis	putative serine protease K12H4.7
A0.A1.NODE_4412_length_3353_cov_2240.264151_g44_i29	Anisakis	KEH16988.1	41.1	954	4.71e-181	0.00434836444590379	3.2345	Nr	KEH16988	senescence-associated protein, putative [Medicago truncatula]	755	PLN	NA	Medicago truncatula	senescence-associated protein, putative
A2.transcripts:Locus_3812_Transcript_29_56_Confidence_0.172_Length_3703	Anisakis	KHN76517.1	63.1	1093	0.0	0.0179701065504909	3.23377	Nr	KHN76517	Thyrotropin-releasing hormone-degrading ectoenzyme [Toxocara canis]	1889	INV	Trhde	Toxocara canis	Thyrotropin-releasing hormone-degrading ectoenzyme
A0.A1.NODE_14368_length_1718_cov_63.330709_g6641_i0	Anisakis	A0A0M3IZM4	90.2	540	2.28e-282	0.015868749387402	3.23355	TrEMBL	A0A0M3IZM4_ANISI	NA	663	NA	ASIM_LOCUS607	Anisakis simplex	Carboxypeptidase
A0.A0.NODE_7913_length_2004_cov_19.214982_g4247_i0	Anisakis	A0A0M3K0N9	94.8	500	0.0	0.0430965755798021	3.22781	TrEMBL	A0A0M3K0N9_ANISI	NA	519	NA	ASIM_LOCUS13810	Anisakis simplex	BPI2 domain-containing protein
A0.A4.NODE_18152_length_1082_cov_30.572526_g5689_i2	Anisakis	A0A0M3I2K1	34.7	199	2.16e-26	0.00118819870139491	3.22685	TrEMBL	A0A0M3I2K1_ASCLU	NA	290	NA	NA	Ascaris lumbricoides	Glycine N-acyltransferase-like protein
A0.A1.NODE_12219_length_1957_cov_7.824868_g5720_i0	Anisakis	A0A0M3JRS6	99.7	575	0.0	2.4725035932339e-05	3.22653	TrEMBL	A0A0M3JRS6_ANISI	NA	579	NA	ASIM_LOCUS10183	Anisakis simplex	MFS domain-containing protein
A2.transcripts:Locus_2326_Transcript_14_19_Confidence_0.375_Length_4256	Anisakis	F1KRR3	82.2	680	0.0	0.033057340942713	3.20738	TrEMBL	F1KRR3_ASCSU	Dihydrothymine dehydrogenase	1059	NA	NA	Ascaris suum	Dihydropyrimidine dehydrogenase [NADP(+)]
A2.transcripts:Locus_1505_Transcript_9_13_Confidence_0.065_Length_3165	Anisakis	KHN83246.1	54.4	927	0.0	0.0269112971817745	3.19653	Nr	KHN83246	IgGFc-binding protein [Toxocara canis]	929	INV	FCGBP	Toxocara canis	IgGFc-binding protein
A0.A2.NODE_727_length_1946_cov_74.182055_g588_i0	Anisakis	A0A0M3I2K1	38.3	175	3.35e-22	0.000699748833266754	3.19301	TrEMBL	A0A0M3I2K1_ASCLU	NA	290	NA	NA	Ascaris lumbricoides	Glycine N-acyltransferase-like protein
A2.transcripts:Locus_217_Transcript_23_23_Confidence_0.030_Length_1290	Anisakis	KHN77197.1	74.3	276	2.08e-131	8.93664971328449e-05	3.19084	Nr	KHN77197	Krev interaction trapped protein 1 [Toxocara canis]	775	INV	KRIT1	Toxocara canis	Krev interaction trapped protein 1
A2.transcripts:Locus_7178_Transcript_22_43_Confidence_0.100_Length_486	Anisakis	CDP98032.1	41.8	110	5.58e-19	0.00042206947204056	3.18511	Nr	CDP98032	Bm10411 [Brugia malayi]	172	INV	Bm10411	Brugia malayi	Bm10411
A2.transcripts:Locus_1_Transcript_41487_107551_Confidence_0.000_Length_2473	Anisakis	A0A0M3KGM4	97.5	161	3.00e-101	0.0404204514410118	3.18414	TrEMBL	A0A0M3KGM4_ANISI	NA	213	NA	ASIM_LOCUS19522	Anisakis simplex	BPTI/Kunitz inhibitor domain-containing protein
A0.A2.NODE_3028_length_1082_cov_746.762583_g1136_i2	Anisakis	A0A1L5SMA4	75.6	360	3.00e-193	2.96767705185643e-05	3.18175	TrEMBL	A0A1L5SMA4_ANISI	NA	526	NA	AMY	Anisakis simplex	Alpha-amylase
A2.transcripts:Locus_8416_Transcript_6_8_Confidence_0.275_Length_1074	Anisakis	A0A0M3KCS4	100	128	1.52e-82	0.02162682892717	3.17383	TrEMBL	A0A0M3KCS4_ANISI	NA	171	NA	ASIM_LOCUS18171	Anisakis simplex	MFS domain-containing protein
A2.transcripts:Locus_485_Transcript_124_159_Confidence_0.035_Length_1013	Anisakis	P27541.1	49.7	179	1.69e-36	0.000526652271371127	3.16092	Swiss-Prot	HSP70_BRUMA	RecName: Full=Heat shock 70 kDa protein	644	INV	NA	Brugia malayi	Heat shock 70 kDa protein
A0.A6.NODE_3848_length_2746_cov_108.953257_g87_i2	Anisakis	KHN85022.1	59.2	370	6.32e-68	0.00289754810803207	3.15634	Nr	KHN85022	Major antigen [Toxocara canis]	2003	INV	OVT1	Toxocara canis	Major antigen
A0.A1.NODE_2605_length_4095_cov_43.681231_g1388_i0	Anisakis	A0A0M3JYB8	97.7	1003	0.0	0.0228995317003604	3.14745	TrEMBL	A0A0M3JYB8_ANISI	NA	1076	NA	ASIM_LOCUS12858	Anisakis simplex	RTP1_C1 domain-containing protein
A2.transcripts:Locus_12564_Transcript_6_7_Confidence_0.200_Length_955	Anisakis	BAJ78223.1	79.2	221	1.42e-120	0.00697808435726823	3.14483	Nr	BAJ78223	Ani s 12 allergen precursor [Anisakis simplex]	295	INV	Anis12	Anisakis simplex	Ani s 12 allergen precursor
A0.A4.NODE_15669_length_1335_cov_7.360896_g7540_i0	Anisakis	KHN85314.1	38.8	289	3.64e-55	0.00258119274197922	3.1442	Nr	KHN85314	Putative acid phosphatase F26C11.1 [Toxocara canis]	967	INV	F26C11.1	Toxocara canis	putative acid phosphatase F26C11.1
A2.transcripts:Locus_2988_Transcript_62_113_Confidence_0.096_Length_1339	Anisakis	KAF1619451.1	51.2	387	5.11e-131	1.71025322752302e-05	3.13965	Nr	KAF1619451	putative endochitinase, partial [Eudyptes robustus]	480	VRT	cht-1	Eudyptes robustus	putative endochitinase
A1.A4.R2367343	Anisakis	KAF8375472.1	56.8	264	1.16e-96	0.0244149145545143	3.13419	Nr	KAF8375472	ccg-1 [Pristionchus pacificus]	272	INV	NA	Pristionchus pacificus	ccg-1
A0.A5.NODE_16111_length_1567_cov_12.794619_g6960_i0	Anisakis	KHN85314.1	66.5	394	5.15e-194	0.000627561490787009	3.13081	Nr	KHN85314	Putative acid phosphatase F26C11.1 [Toxocara canis]	967	INV	F26C11.1	Toxocara canis	putative acid phosphatase F26C11.1
A2.transcripts:Locus_963_Transcript_18_19_Confidence_0.133_Length_1787	Anisakis	KHN81970.1	56.6	456	9.83e-176	0.000304531780406198	3.13028	Nr	KHN81970	Major facilitator superfamily domain-containing protein 8 [Toxocara canis]	543	INV	mfsd8	Toxocara canis	Major facilitator superfamily domain-containing protein 8
A1.A1.R3395208	Anisakis	KHN78009.1	69.6	414	3.69e-198	0.0337877642620571	3.12992	Nr	KHN78009	ADAM family mig-17 [Toxocara canis]	453	INV	mig-17	Toxocara canis	ADAM family mig-17
A2.transcripts:Locus_3524_Transcript_111_132_Confidence_0.115_Length_471	Anisakis	KAA0060780.1	48.0	152	8.21e-28	0.0450750837567271	3.12926	Nr	KAA0060780	ORF40s [Cucumis melo var. makuwa]	166	PLN	NA	Cucumis melo var. makuwa	ORF40s
A2.transcripts:Locus_3_Transcript_35121_70181_Confidence_0.000_Length_269	Anisakis	KHN77544.1	53.4	88	3.50e-19	2.57806999319632e-09	3.12831	Nr	KHN77544	Putative serine protease F56F10.1 [Toxocara canis]	986	INV	F56F10.1	Toxocara canis	putative serine protease F56F10.1
A2.transcripts:Locus_19898_Transcript_16_36_Confidence_0.269_Length_1719	Anisakis	A0A0M3K611	67.5	464	4.09e-175	0.0219658219066633	3.12795	TrEMBL	A0A0M3K611_ANISI	NA	338	NA	ASIM_LOCUS15809	Anisakis simplex	GINS complex subunit 2
A2.transcripts:Locus_1206_Transcript_16_25_Confidence_0.476_Length_2620	Anisakis	KHN89098.1	67.0	573	4.39e-252	0.0326755673537325	3.12165	Nr	KHN89098	Transmembrane protein -like protein [Toxocara canis]	570	INV	NA	Toxocara canis	Transmembrane protein -like protein
A2.transcripts:Locus_8316_Transcript_7_9_Confidence_0.267_Length_1774	Anisakis	KHN73773.1	74.5	483	4.80e-234	7.15344461264834e-06	3.12018	Nr	KHN73773	Beta-2 adrenergic receptor [Toxocara canis]	538	INV	ADRB2	Toxocara canis	Beta-2 adrenergic receptor
A0.A3.NODE_6875_length_916_cov_110.729425_g1199_i3	Anisakis	KHN74592.1	89.7	58	1.35e-24	0.0160185778070189	3.1191	Nr	KHN74592	Putative serine protease K12H4.7, partial [Toxocara canis]	1661	INV	K12H4.7	Toxocara canis	putative serine protease K12H4.7
A0.A0.NODE_10494_length_1620_cov_161.591054_g5709_i0	Anisakis	A0A0M3K555	100	147	3.68e-67	0.00175405358387548	3.11852	TrEMBL	A0A0M3K555_ANISI	NA	292	NA	ASIM_LOCUS15503	Anisakis simplex	Col_cuticle_N domain-containing protein
A0.A5.NODE_18361_length_1397_cov_5.852290_g7812_i0	Anisakis	A0A0M3IYF0	52.2	138	7.27e-38	2.46029832112751e-07	3.11697	TrEMBL	A0A0M3IYF0_ANISI	NA	393	NA	ASIM_LOCUS183	Anisakis simplex	Protein kinase domain-containing protein
A2.transcripts:Locus_728_Transcript_54_58_Confidence_0.159_Length_981	Anisakis	KHN80558.1	57.5	106	4.02e-31	3.09598466664468e-05	3.11133	Nr	KHN80558	Retinol dehydrogenase 16 [Toxocara canis]	396	INV	RDH16	Toxocara canis	Retinol dehydrogenase 16
A2.transcripts:Locus_206_Transcript_17_30_Confidence_0.170_Length_1578	Anisakis	KHN73556.1	91.1	146	3.63e-73	0.00525350955047585	3.11001	Nr	KHN73556	Intermediate filament protein ifa-1 [Toxocara canis]	570	INV	ifa-1	Toxocara canis	Intermediate filament protein ifa-1
A0.A0.NODE_6155_length_2336_cov_414.848751_g2463_i2	Anisakis	KHN77544.1	58.6	760	2.21e-313	0.000847713564032548	3.09827	Nr	KHN77544	Putative serine protease F56F10.1 [Toxocara canis]	986	INV	F56F10.1	Toxocara canis	putative serine protease F56F10.1
A0.A0.NODE_1367_length_4370_cov_121.441715_g764_i0	Anisakis	KHN88925.1	80.6	598	0.0	0.0267191863368785	3.09359	Nr	KHN88925	Long-chain fatty acid transport protein 4 [Toxocara canis]	620	INV	Slc27a4	Toxocara canis	Long-chain fatty acid transport protein 4
A2.transcripts:Locus_7496_Transcript_1_1_Confidence_0.000_Length_1324	Anisakis	KHN87310.1	85.6	376	1.70e-233	0.0147391085878653	3.08884	Nr	KHN87310	L-threonine 3-dehydrogenase, mitochondrial [Toxocara canis]	393	INV	Tdh	Toxocara canis	L-threonine 3-dehydrogenase, mitochondrial
A0.A3.NODE_11951_length_587_cov_11.879928_g9832_i0	Anisakis	A0A4U5NHP5	65.0	80	1.12e-29	0.000667174062250829	3.08796	TrEMBL	A0A4U5NHP5_STECR	NA	776	NA	L596_015987	Steinernema carpocapsae	Peptidase M12B domain-containing protein
A2.transcripts:Locus_4_Transcript_6435_21802_Confidence_0.000_Length_2210	Anisakis	A0A0M3I2K1	31.6	285	2.06e-31	0.0192784385104613	3.07399	TrEMBL	A0A0M3I2K1_ASCLU	NA	290	NA	NA	Ascaris lumbricoides	Glycine N-acyltransferase-like protein
A2.transcripts:Locus_1827_Transcript_9_15_Confidence_0.115_Length_729	Anisakis	A0A0M3IYS1	100	149	4.62e-99	0.0221459569484834	3.07375	TrEMBL	A0A0M3IYS1_ANISI	NA	543	NA	ASIM_LOCUS304	Anisakis simplex	Metalloendopeptidase
A0.A3.NODE_6112_length_989_cov_121.236458_g4907_i0	Anisakis	A0A0M3JXZ6	99.3	141	1.02e-96	0.024413936358112	3.06591	TrEMBL	A0A0M3JXZ6_ANISI	NA	153	NA	ASIM_LOCUS12713	Anisakis simplex	SCP domain-containing protein
A2.transcripts:Locus_3446_Transcript_13_56_Confidence_0.054_Length_1251	Anisakis	KHN85314.1	63.6	231	7.98e-98	0.0437827512969146	3.06358	Nr	KHN85314	Putative acid phosphatase F26C11.1 [Toxocara canis]	967	INV	F26C11.1	Toxocara canis	putative acid phosphatase F26C11.1
A0.A2.NODE_16040_length_332_cov_5.930693_g14852_i0	Anisakis	A0A0M3K3F6	100	110	1.71e-60	0.00893445347546517	3.06134	TrEMBL	A0A0M3K3F6_ANISI	NA	1071	NA	ASIM_LOCUS14904	Anisakis simplex	Chitin synthase
A2.transcripts:Locus_31275_Transcript_1_2_Confidence_0.750_Length_2081	Anisakis	A0A0M3JU73	99.4	333	1.75e-249	0.00192606428323031	3.06047	TrEMBL	A0A0M3JU73_ANISI	NA	651	NA	ASIM_LOCUS11179	Anisakis simplex	Phosphoenolpyruvate carboxykinase (GTP)
A2.transcripts:Locus_1178_Transcript_36_49_Confidence_0.425_Length_2272	Anisakis	A0A4U8UH60	31.3	256	3.69e-23	0.000181882872885643	3.05987	TrEMBL	A0A4U8UH60_STECR	NA	1387	NA	L596_000146	Steinernema carpocapsae	G_PROTEIN_RECEP_F2_4 domain-containing protein
A2.transcripts:Locus_4271_Transcript_3_13_Confidence_0.579_Length_1021	Anisakis	A0A0B2VN18	95.8	216	6.97e-141	0.0368405242588299	3.05983	TrEMBL	A0A0B2VN18_TOXCA	NA	216	NA	rpl-10a	Toxocara canis	Ribosomal protein
A2.transcripts:Locus_3_Transcript_22952_70181_Confidence_0.000_Length_1611	Anisakis	KHN85314.1	64.3	423	5.00e-196	0.0189647278053824	3.03686	Nr	KHN85314	Putative acid phosphatase F26C11.1 [Toxocara canis]	967	INV	F26C11.1	Toxocara canis	putative acid phosphatase F26C11.1
A1.A1.R3345548	Anisakis	KHN73107.1	63.5	1343	0.0	0.000227057975157027	3.03099	Nr	KHN73107	Collagen alpha-6(VI) chain [Toxocara canis]	2366	INV	COL6A6	Toxocara canis	Collagen alpha-6(VI) chain
A0.A5.NODE_8394_length_2380_cov_113.274711_g3909_i0	Anisakis	KHN78102.1	61.4	114	4.20e-32	0.00727778745829378	3.02682	Nr	KHN78102	Y-box factor -like protein [Toxocara canis]	330	INV	NA	Toxocara canis	Y-box factor -like protein
A2.transcripts:Locus_3834_Transcript_18_25_Confidence_0.315_Length_2974	Anisakis	A0A0M3JU73	99.5	631	0.0	0.000618867922158453	3.02638	TrEMBL	A0A0M3JU73_ANISI	NA	651	NA	ASIM_LOCUS11179	Anisakis simplex	Phosphoenolpyruvate carboxykinase (GTP)
A2.transcripts:Locus_13126_Transcript_12_12_Confidence_0.542_Length_613	Anisakis	BAJ78220.1	89.4	104	1.18e-14	0.0104021780429303	3.02166	Nr	BAJ78220	Ani s 11 allergen precursor [Anisakis simplex]	307	INV	Anis11	Anisakis simplex	Ani s 11 allergen precursor
A2.transcripts:Locus_683_Transcript_38_78_Confidence_0.101_Length_2217	Anisakis	KHN72551.1	74.1	147	9.57e-67	0.0167066230864414	3.0159	Nr	KHN72551	Protein slowmo -like protein 2 [Toxocara canis]	194	INV	SLMO2	Toxocara canis	Protein slowmo -like protein 2
A2.transcripts:Locus_2237_Transcript_9_10_Confidence_0.130_Length_2167	Anisakis	KHN85245.1	60.7	224	2.11e-72	0.0313388482853547	2.99732	Nr	KHN85245	Leucine-rich PPR motif-containing protein, mitochondrial [Toxocara canis]	1082	INV	Lrpprc	Toxocara canis	Leucine-rich PPR motif-containing protein, mitochondrial
A1.A0.R3526442	Anisakis	A0A0M3J0D2	99.3	145	2.04e-98	0.033551577271893	2.99124	TrEMBL	A0A0M3J0D2_ANISI	NA	150	NA	ASIM_LOCUS865	Anisakis simplex	Gamma-glutamylcyclotransferase
A0.A1.NODE_19574_length_1230_cov_4.812554_g8870_i0	Anisakis	ACD87749.1	90.8	109	1.59e-59	0.0179469287016977	2.98577	Nr	ACD87749	glycerol kinase [Candidatus Liberibacter americanus str. Sao Paulo]	152	BCT	NA	Candidatus Liberibacter americanus str. Sao Paulo	glycerol kinase
A2.transcripts:Locus_8675_Transcript_2_4_Confidence_0.714_Length_880	Anisakis	A0A0M3JV01	89.3	150	9.46e-85	0.0496123451184764	2.98372	TrEMBL	A0A0M3JV01_ANISI	NA	339	NA	ASIM_LOCUS11498	Anisakis simplex	Cystatin domain-containing protein
A2.transcripts:Locus_397_Transcript_49_193_Confidence_0.004_Length_493	Anisakis	KHN71938.1	78.0	50	5.57e-16	4.68843125380362e-05	2.98235	Nr	KHN71938	Gamma-glutamyltranspeptidase 1 [Toxocara canis]	1038	INV	Ggt1	Toxocara canis	Gamma-glutamyltranspeptidase 1
A0.A5.NODE_8069_length_2427_cov_15.005872_g3764_i0	Anisakis	XP_024498982.1	52.8	197	1.59e-58	0.00336228671590417	2.98031	Nr	XP_024498982	Lipase EstA/Esterase EstB family-containing protein [Strongyloides ratti]	301	INV	NA	Strongyloides ratti	Lipase EstA/Esterase EstB family-containing protein
A0.A2.NODE_3986_length_934_cov_50.424309_g237_i1	Anisakis	KHN73026.1	58.2	55	1.14e-06	0.00212197001397252	2.97797	Nr	KHN73026	Chondroadherin-like protein [Toxocara canis]	698	INV	CHADL	Toxocara canis	Chondroadherin-like protein
A2.transcripts:Locus_3_Transcript_16359_70181_Confidence_0.000_Length_805	Anisakis	F1KZW7	60.3	126	1.55e-32	0.00159934307734319	2.97768	TrEMBL	F1KZW7_ASCSU	NA	339	NA	NA	Ascaris suum	Dihydrolipoamide acetyltransferase component of pyruvate dehydrogenase complex
A2.transcripts:Locus_3_Transcript_47405_70181_Confidence_0.001_Length_6470	Anisakis	KHN82102.1	60.3	189	4.50e-59	0.0498445395340979	2.97724	Nr	KHN82102	Paternally-expressed protein [Toxocara canis]	3286	INV	PEG3	Toxocara canis	Paternally-expressed protein
A2.transcripts:Locus_178_Transcript_11_13_Confidence_0.318_Length_690	Anisakis	KHN88953.1	56.5	62	1.02e-10	0.00514016916224674	2.97071	Nr	KHN88953	Intermediate filament protein ifa-1 [Toxocara canis]	708	INV	ifa-1	Toxocara canis	Intermediate filament protein ifa-1
A2.transcripts:Locus_5365_Transcript_24_50_Confidence_0.183_Length_867	Anisakis	KHN74592.1	84.3	134	5.28e-72	0.0361405680535472	2.96473	Nr	KHN74592	Putative serine protease K12H4.7, partial [Toxocara canis]	1661	INV	K12H4.7	Toxocara canis	putative serine protease K12H4.7
A0.A5.NODE_14914_length_1662_cov_5.717727_g6507_i1	Anisakis	A0A0N5AGB6	80.2	364	1.66e-206	0.0429368535992318	2.96374	TrEMBL	A0A0N5AGB6_9BILA	NA	387	NA	NA	Syphacia muris	acidPPc domain-containing protein
A2.transcripts:Locus_41918_Transcript_2_7_Confidence_0.545_Length_1287	Anisakis	A0A0M3JY34	83.7	203	3.00e-109	1.40374134336927e-06	2.96306	TrEMBL	A0A0M3JY34_ANISI	NA	300	NA	ASIM_LOCUS12760	Anisakis simplex	PNP_UDP_1 domain-containing protein
A0.A5.NODE_18334_length_1399_cov_8.394543_g7802_i0	Anisakis	A0A0M3JY34	99.0	300	1.76e-214	0.00169916764050929	2.95816	TrEMBL	A0A0M3JY34_ANISI	NA	300	NA	ASIM_LOCUS12760	Anisakis simplex	PNP_UDP_1 domain-containing protein
A2.transcripts:Locus_17554_Transcript_9_23_Confidence_0.632_Length_2060	Anisakis	KHN88938.1	52.3	405	8.41e-142	0.00343868177781609	2.95645	Nr	KHN88938	Cell-death-related nuclease 7 [Toxocara canis]	394	INV	crn-7	Toxocara canis	Cell-death-related nuclease 7
A2.transcripts:Locus_618_Transcript_51_68_Confidence_0.291_Length_2515	Anisakis	KHN85848.1	43.8	233	8.97e-48	1.01550952404676e-05	2.9503	Nr	KHN85848	Hemicentin-1 [Toxocara canis]	1056	INV	HMCN1	Toxocara canis	Hemicentin-1
A2.transcripts:Locus_1_Transcript_105360_107551_Confidence_0.000_Length_1059	Anisakis	CDP94729.1	36.1	183	8.57e-31	0.00950676993272761	2.94865	Nr	CDP94729	Bm415, isoform a [Brugia malayi]	182	INV	Bm415	Brugia malayi	Bm415, isoform a
A0.A4.NODE_2031_length_4138_cov_68.883085_g1118_i1	Anisakis	KHN87065.1	42.3	563	2.14e-103	0.000547268908421358	2.94847	Nr	KHN87065	Prominin-1 [Toxocara canis]	794	INV	Prom1	Toxocara canis	Prominin-1
A2.transcripts:Locus_4_Transcript_10273_21802_Confidence_0.000_Length_2964	Anisakis	APP18134.1	97.9	526	0.0	5.83136730624049e-05	2.94658	Nr	APP18134	alpha-amylase [Anisakis simplex]	526	INV	AMY	Anisakis simplex	alpha-amylase
A0.A6.NODE_10067_length_1570_cov_67.072031_g5733_i0	Anisakis	A0A0M3I2K1	28.4	292	1.63e-32	0.0406705729833582	2.93661	TrEMBL	A0A0M3I2K1_ASCLU	NA	290	NA	NA	Ascaris lumbricoides	Glycine N-acyltransferase-like protein
A0.A1.NODE_995_length_5529_cov_550.920542_g83_i2	Anisakis	KHN81382.1	84.8	679	0.0	0.000638418368952267	2.93509	Nr	KHN81382	Filamin-A [Toxocara canis]	2188	INV	FLNA	Toxocara canis	Filamin-A
A0.A4.NODE_7712_length_2411_cov_148.542194_g3597_i1	Anisakis	CDP93262.1	31.2	186	4.24e-20	0.00281627295363603	2.93161	Nr	CDP93262	Bm333, partial [Brugia malayi]	241	INV	Bm333	Brugia malayi	Bm333
A2.transcripts:Locus_255_Transcript_159_258_Confidence_0.048_Length_1884	Anisakis	KHN81309.1	77.0	357	1.86e-194	0.0467339181238742	2.92603	Nr	KHN81309	Zinc finger protein ZPR1 -like protein [Toxocara canis]	473	INV	W03F9.1	Toxocara canis	Zinc finger protein ZPR1 -like protein
A0.A6.NODE_13915_length_1123_cov_58.981718_g3510_i2	Anisakis	KHN83852.1	64.6	79	4.70e-22	0.0292107657948119	2.92597	Nr	KHN83852	Short-chain dehydrogenase/reductase family 9C member 7 [Toxocara canis]	448	INV	SDR9C7	Toxocara canis	Short-chain dehydrogenase/reductase family 9C member 7
A0.A1.NODE_21784_length_1049_cov_56.826884_g9986_i0	Anisakis	A0A0B2VIS5	26.9	253	2.99e-18	8.5312858367885e-05	2.91549	TrEMBL	A0A0B2VIS5_TOXCA	NA	243	NA	Tcan_06081	Toxocara canis	Glycine N-acyltransferase-like protein
A0.A1.NODE_14513_length_1701_cov_416.280906_g6705_i0	Anisakis	A0A0M3JTZ9	97.0	165	3.23e-109	0.0196834662808537	2.9119	TrEMBL	A0A0M3JTZ9_ANISI	NA	215	NA	ASIM_LOCUS11097	Anisakis simplex	ShKT domain-containing protein
A0.A1.NODE_11067_length_2102_cov_97.870270_g5071_i1	Anisakis	CDJ89750.1	46.6	504	4.60e-136	0.0454041380001304	2.91063	Nr	CDJ89750	Peptidase S28 domain containing protein [Haemonchus contortus]	540	INV	NA	Haemonchus contortus	Peptidase S28 domain containing protein
A1.A5.R3327623	Anisakis	KHN86802.1	71.4	336	9.04e-163	0.0143960135360142	2.90543	Nr	KHN86802	putative glutathione transferase omega-2 [Toxocara canis]	345	INV	gsto-2	Toxocara canis	putative glutathione transferase omega-2
A2.transcripts:Locus_701_Transcript_43_94_Confidence_0.031_Length_1566	Anisakis	KHN86737.1	75.4	138	1.54e-72	0.00273210632354855	2.90083	Nr	KHN86737	Warthog protein 5 [Toxocara canis]	187	INV	wrt-5	Toxocara canis	Warthog protein 5
A0.A5.NODE_19120_length_1343_cov_11.323846_g8119_i0	Anisakis	KHN85779.1	78.8	193	8.59e-103	0.0065010912833646	2.90055	Nr	KHN85779	Short-chain dehydrogenase TIC 32, chloroplastic [Toxocara canis]	198	INV	TIC32	Toxocara canis	Short-chain dehydrogenase TIC 32, chloroplastic
A0.A4.NODE_691_length_5320_cov_37.176359_g397_i0	Anisakis	KHN79692.1	44.1	1110	1.76e-239	0.000246799243939124	2.89097	Nr	KHN79692	Erythroid differentiation-related factor 1 [Toxocara canis]	1212	INV	EDRF1	Toxocara canis	Erythroid differentiation-related factor 1
A0.A4.NODE_3563_length_3434_cov_624.661656_g1973_i0	Anisakis	A0A0M3I776	58.3	408	2.56e-172	4.52258530050339e-07	2.88923	TrEMBL	A0A0M3I776_ASCLU	NA	503	NA	NA	Ascaris lumbricoides	Glucuronosyltransferase
A2.transcripts:Locus_469_Transcript_76_88_Confidence_0.063_Length_2487	Anisakis	KHN85848.1	54.5	341	4.15e-102	0.0207338902330326	2.88567	Nr	KHN85848	Hemicentin-1 [Toxocara canis]	1056	INV	HMCN1	Toxocara canis	Hemicentin-1
A0.A5.NODE_34629_length_578_cov_4.714019_g17138_i0	Anisakis	CDJ88360.1	55.6	45	5.38e-07	0.00251441077836097	2.88482	Nr	CDJ88360	Lipoma HMGIC fusion partner protein and Heat shock protein 70 domain containing protein [Haemonchus contortus]	829	INV	NA	Haemonchus contortus	Lipoma HMGIC fusion partner protein and Heat shock protein 70 domain containing protein
A2.transcripts:Locus_308_Transcript_14_23_Confidence_0.222_Length_2636	Anisakis	CTP81991.1	64.2	408	2.21e-179	0.0340741909183162	2.87788	Nr	CTP81991	Bm6969, isoform b [Brugia malayi]	417	INV	Bm6969	Brugia malayi	Bm6969, isoform b
A2.transcripts:Locus_7720_Transcript_5_9_Confidence_0.615_Length_2058	Anisakis	A0A0M3IZS6	93.2	324	8.50e-223	9.82301399532342e-05	2.86907	TrEMBL	A0A0M3IZS6_ANISI	NA	474	NA	ASIM_LOCUS659	Anisakis simplex	Purple acid phosphatase
A2.transcripts:Locus_45145_Transcript_7_9_Confidence_0.609_Length_611	Anisakis	A0A0M3J8C6	96.1	77	3.58e-44	0.000816916130491953	2.86685	TrEMBL	A0A0M3J8C6_ANISI	NA	143	NA	ASIM_LOCUS3660	Anisakis simplex	ShKT domain-containing protein
A2.transcripts:Locus_549_Transcript_9_67_Confidence_0.108_Length_1485	Anisakis	A0A3P6SZK1	100	118	6.88e-69	0.000535623750409381	2.86603	TrEMBL	A0A3P6SZK1_ANISI	NA	797	NA	ASIM_LOCUS16907	Anisakis simplex	Oxoglutarate dehydrogenase (succinyl-transferring)
A0.A5.NODE_16661_length_1524_cov_364.866307_g1136_i7	Anisakis	KHN86070.1	49.7	151	8.36e-31	0.0159918991861997	2.86126	Nr	KHN86070	putative ubiquitin carboxyl-terminal hydrolase K02C4.3 [Toxocara canis]	1153	INV	K02C4.3	Toxocara canis	putative ubiquitin carboxyl-terminal hydrolase K02C4.3
A1.A5.R3312295	Anisakis	KHN85171.1	69.7	228	2.64e-109	0.00235173868287578	2.85844	Nr	KHN85171	Beta-glucosidase 6 [Toxocara canis]	523	INV	BGLU6	Toxocara canis	Beta-glucosidase 6
A2.transcripts:Locus_3_Transcript_18616_70181_Confidence_0.000_Length_1906	Anisakis	A0A3P7H2K5	92.8	375	1.65e-248	0.00126548703753781	2.85699	TrEMBL	A0A3P7H2K5_TOXCA	NA	396	NA	TCNE_LOCUS16488	Toxocara canis	Aminotran_1_2 domain-containing protein
A0.A1.NODE_8991_length_2388_cov_3380.150797_g4066_i1	Anisakis	A0A183V1K9	86.4	88	6.81e-41	0.0316786325263707	2.85587	TrEMBL	A0A183V1K9_TOXCA	NA	121	NA	TCNE_LOCUS14629	Toxocara canis	40S ribosomal protein S26
A0.A4.NODE_8441_length_2289_cov_12.806940_g3915_i1	Anisakis	A0A0M3I2K1	32.0	153	2.74e-12	0.00822005504393498	2.85341	TrEMBL	A0A0M3I2K1_ASCLU	NA	290	NA	NA	Ascaris lumbricoides	Glycine N-acyltransferase-like protein
A2.transcripts:Locus_3_Transcript_65770_70181_Confidence_0.000_Length_1515	Anisakis	KHN89152.1	53.0	366	2.28e-126	1.04570470001422e-05	2.85048	Nr	KHN89152	Lysine histidine transporter 1 [Toxocara canis]	524	INV	LHT1	Toxocara canis	Lysine histidine transporter 1
A2.transcripts:Locus_19527_Transcript_7_7_Confidence_0.000_Length_914	Anisakis	A0A0M3KBJ4	98.0	151	1.09e-108	0.0122226784137989	2.84599	TrEMBL	A0A0M3KBJ4_ANISI	NA	151	NA	NA	Anisakis simplex	Pepsin-I3 domain-containing protein
A1.A6.R986091	Anisakis	CDJ97188.1	51.1	485	1.38e-172	0.0356991212480877	2.83443	Nr	CDJ97188	Peptidase S28 domain containing protein [Haemonchus contortus]	503	INV	NA	Haemonchus contortus	Peptidase S28 domain containing protein
A2.transcripts:Locus_1235_Transcript_66_76_Confidence_0.154_Length_2284	Anisakis	A0A0M3K460	83.0	371	1.06e-216	0.0127989139607136	2.82954	TrEMBL	A0A0M3K460_ANISI	NA	500	NA	ASIM_LOCUS15159	Anisakis simplex	Sulfhydryl oxidase
A2.transcripts:Locus_20225_Transcript_1_32_Confidence_0.123_Length_485	Anisakis	A0A0M3JT24	97.0	66	6.55e-37	8.73571465094239e-07	2.82825	TrEMBL	A0A0M3JT24_ANISI	NA	145	NA	ASIM_LOCUS10714	Anisakis simplex	SH3 domain-containing protein
A2.transcripts:Locus_110_Transcript_15_195_Confidence_0.066_Length_2544	Anisakis	KHN77544.1	73.0	233	1.13e-114	0.0418197245464162	2.82621	Nr	KHN77544	Putative serine protease F56F10.1 [Toxocara canis]	986	INV	F56F10.1	Toxocara canis	putative serine protease F56F10.1
A0.A5.NODE_8331_length_2390_cov_147.620366_g3881_i0	Anisakis	CDJ97188.1	53.3	443	1.11e-166	0.00126223099273375	2.82572	Nr	CDJ97188	Peptidase S28 domain containing protein [Haemonchus contortus]	503	INV	NA	Haemonchus contortus	Peptidase S28 domain containing protein
A1.A2.R683208	Anisakis	KHN83852.1	48.6	449	1.29e-133	0.000334866322708961	2.82324	Nr	KHN83852	Short-chain dehydrogenase/reductase family 9C member 7 [Toxocara canis]	448	INV	SDR9C7	Toxocara canis	Short-chain dehydrogenase/reductase family 9C member 7
A2.transcripts:Locus_275_Transcript_17_29_Confidence_0.407_Length_2512	Anisakis	KHN77544.1	70.2	476	4.90e-246	1.99476516788557e-06	2.82274	Nr	KHN77544	Putative serine protease F56F10.1 [Toxocara canis]	986	INV	F56F10.1	Toxocara canis	putative serine protease F56F10.1
A2.transcripts:Locus_1_Transcript_4364_107551_Confidence_0.000_Length_410	Anisakis	KHN77544.1	72.8	92	3.54e-41	0.0296166572856419	2.8225	Nr	KHN77544	Putative serine protease F56F10.1 [Toxocara canis]	986	INV	F56F10.1	Toxocara canis	putative serine protease F56F10.1
A2.transcripts:Locus_4924_Transcript_10_29_Confidence_0.469_Length_1353	Anisakis	A0A0M3JR39	99.3	307	1.40e-213	0.00573714565482051	2.81204	TrEMBL	A0A0M3JR39_ANISI	NA	324	NA	ASIM_LOCUS9905	Anisakis simplex	Sidoreflexin
A2.transcripts:Locus_3059_Transcript_7_9_Confidence_0.360_Length_1246	Anisakis	A0A0M3JA37	99.2	119	4.30e-73	0.036746228817278	2.80998	TrEMBL	A0A0M3JA37_ANISI	NA	123	NA	ASIM_LOCUS4270	Anisakis simplex	Peptidase M12A domain-containing protein
A2.transcripts:Locus_9486_Transcript_4_6_Confidence_0.800_Length_1226	Anisakis	KHN72313.1	45.4	370	7.35e-120	0.0112005064908132	2.80837	Nr	KHN72313	C-type lectin protein [Toxocara canis]	381	INV	clec-160	Toxocara canis	C-type lectin protein
A1.A0.J3474883	Anisakis	A0A0M3JU73	99.0	103	1.33e-65	0.00353167447053319	2.80655	TrEMBL	A0A0M3JU73_ANISI	NA	651	NA	ASIM_LOCUS11179	Anisakis simplex	Phosphoenolpyruvate carboxykinase (GTP)
A0.A4.NODE_15365_length_1369_cov_30.095633_g5763_i2	Anisakis	KHN87939.1	48.3	60	7.00e-07	0.0118697795148154	2.80415	Nr	KHN87939	Leucine-rich repeat protein 1 [Toxocara canis]	552	INV	LRR1	Toxocara canis	Leucine-rich repeat protein 1
A0.A1.NODE_21853_length_1045_cov_9.819018_g10021_i0	Anisakis	KHN86832.1	78.9	284	5.24e-149	0.00107486362699587	2.78825	Nr	KHN86832	Ligand-gated ion channel 50 [Toxocara canis]	570	INV	lgc-50	Toxocara canis	Ligand-gated ion channel 50
A0.A4.NODE_14814_length_1431_cov_19.667626_g5561_i1	Anisakis	KHN87639.1	62.0	234	1.45e-90	0.0252776730369995	2.77975	Nr	KHN87639	Putative cytochrome b561 [Toxocara canis]	252	INV	F55H2.5	Toxocara canis	putative cytochrome b561
A1.A1.R3391698	Anisakis	A0A0M3IYR5	85.1	322	7.15e-181	0.0339646772556775	2.77244	TrEMBL	A0A0M3IYR5_ANISI	NA	289	NA	ASIM_LOCUS298	Anisakis simplex	Glyco_hydro_38C domain-containing protein
A1.A2.R684612	Anisakis	AZA15243.1	99.3	860	0.0	0.00669977720848734	2.77077	Nr	AZA15243	peptide transporter family 1 [Anisakis pegreffii]	862	INV	pept-1	Anisakis pegreffii	peptide transporter family 1
A2.transcripts:Locus_28_Transcript_48_68_Confidence_0.282_Length_14847	Anisakis	KHN80136.1	40.8	1726	0.0	9.35609758202377e-07	2.76672	Nr	KHN80136	Basement membrane proteoglycan [Toxocara canis]	5738	INV	unc-52	Toxocara canis	Basement membrane proteoglycan
A2.transcripts:Locus_3_Transcript_4015_70181_Confidence_0.000_Length_3762	Anisakis	A0A3P6QYM4	97.7	597	0.0	0.00697361472593218	2.76188	TrEMBL	A0A3P6QYM4_ANISI	NA	598	NA	ASIM_LOCUS15644	Anisakis simplex	DNA_mis_repair domain-containing protein
A2.transcripts:Locus_3_Transcript_35113_70181_Confidence_0.000_Length_2453	Anisakis	KHN77544.1	70.2	497	4.52e-255	3.94496442973999e-18	2.76139	Nr	KHN77544	Putative serine protease F56F10.1 [Toxocara canis]	986	INV	F56F10.1	Toxocara canis	putative serine protease F56F10.1
A2.transcripts:Locus_2697_Transcript_5_9_Confidence_0.333_Length_1083	Anisakis	A0A0M3J0L9	93.1	173	1.09e-99	0.000133824694989408	2.75925	TrEMBL	A0A0M3J0L9_ANISI	NA	320	NA	ASIM_LOCUS952	Anisakis simplex	MADF domain-containing protein
A1.A4.J2376903	Anisakis	F1KW74	77.1	70	3.32e-29	0.00671512276541534	2.7567	TrEMBL	F1KW74_ASCSU	NA	777	NA	NA	Ascaris suum	Aminopeptidase
A0.A1.NODE_15538_length_1597_cov_4.187582_g7132_i0	Anisakis	VIO89892.1	31.3	275	3.42e-22	0.0383485337487358	2.75624	Nr	VIO89892	Hypothetical 71.3 kDa protein in SCM4-MUP1 intergenic region, putative [Brugia malayi]	564	INV	Bm12328	Brugia malayi	Hypothetical 71.3 kDa protein in SCM4-MUP1 intergenic region, putative
A2.transcripts:Locus_3_Transcript_38876_70181_Confidence_0.000_Length_1872	Anisakis	A0A0M3IZY9	97.8	314	7.45e-221	0.00187805083827619	2.75363	TrEMBL	A0A0M3IZY9_ANISI	NA	314	NA	ASIM_LOCUS722	Anisakis simplex	Poly(U)-specific endoribonuclease
A0.A5.NODE_19852_length_1293_cov_74.090400_g8405_i0	Anisakis	A0A0M3I2K1	33.7	163	2.34e-17	0.0467953963338868	2.74861	TrEMBL	A0A0M3I2K1_ASCLU	NA	290	NA	NA	Ascaris lumbricoides	Glycine N-acyltransferase-like protein
A2.transcripts:Locus_3_Transcript_8817_70181_Confidence_0.000_Length_1233	Anisakis	A0A158PP91	65.4	130	9.77e-26	0.00048764462489764	2.7459	TrEMBL	A0A158PP91_ANISI	NA	1666	NA	ASIM_LOCUS13362	Anisakis simplex	Protein kinase domain-containing protein
A0.A6.NODE_6862_length_2058_cov_336.252834_g3999_i0	Anisakis	A0A0M3JXY6	68.5	425	7.00e-178	0.0388349896058828	2.7439	TrEMBL	A0A0M3JXY6_ANISI	NA	364	NA	ASIM_LOCUS12701	Anisakis simplex	Pyruvate dehydrogenase E1 component subunit beta
A2.transcripts:Locus_4281_Transcript_3_6_Confidence_0.571_Length_2891	Anisakis	KHN79273.1	72.1	337	4.45e-173	3.61660524267599e-08	2.73844	Nr	KHN79273	Prostatic acid phosphatase [Toxocara canis]	745	INV	ACPP	Toxocara canis	Prostatic acid phosphatase
A2.transcripts:Locus_3_Transcript_6738_70181_Confidence_0.000_Length_2646	Anisakis	F1L1B7	80.2	278	1.24e-167	0.0438604874682096	2.72694	TrEMBL	F1L1B7_ASCSU	NA	588	NA	NA	Ascaris suum	Phospholipase B-like
A2.transcripts:Locus_161_Transcript_11_19_Confidence_0.581_Length_6402	Anisakis	KHN76517.1	68.9	1361	0.0	5.81000984633139e-05	2.72621	Nr	KHN76517	Thyrotropin-releasing hormone-degrading ectoenzyme [Toxocara canis]	1889	INV	Trhde	Toxocara canis	Thyrotropin-releasing hormone-degrading ectoenzyme
A2.transcripts:Locus_469_Transcript_85_88_Confidence_0.082_Length_3792	Anisakis	KHN85848.1	55.4	341	5.94e-101	0.000238812015544526	2.72108	Nr	KHN85848	Hemicentin-1 [Toxocara canis]	1056	INV	HMCN1	Toxocara canis	Hemicentin-1
A2.transcripts:Locus_619_Transcript_16_56_Confidence_0.192_Length_1916	Anisakis	KJH48153.1	50.6	393	2.96e-139	0.0134670115573049	2.71131	Nr	KJH48153	serine carboxypeptidase S28 [Dictyocaulus viviparus]	532	INV	NA	Dictyocaulus viviparus	serine carboxypeptidase S28
A1.A6.R981033	Anisakis	A0A0M3I2K1	33.5	164	1.12e-19	3.07807283388349e-05	2.71035	TrEMBL	A0A0M3I2K1_ASCLU	NA	290	NA	NA	Ascaris lumbricoides	Glycine N-acyltransferase-like protein
A0.A1.NODE_8863_length_2406_cov_124.376657_g4282_i0	Anisakis	KHN85848.1	55.7	336	1.11e-101	0.000442047471290153	2.7042	Nr	KHN85848	Hemicentin-1 [Toxocara canis]	1056	INV	HMCN1	Toxocara canis	Hemicentin-1
A2.transcripts:Locus_6351_Transcript_4_13_Confidence_0.441_Length_2101	Anisakis	A0A158PP60	89.0	456	3.18e-280	0.00586478170487461	2.70298	TrEMBL	A0A158PP60_ANISI	NA	438	NA	ASIM_LOCUS13173	Anisakis simplex	G_PROTEIN_RECEP_F1_2 domain-containing protein
A0.A5.NODE_7341_length_2542_cov_9.087635_g3467_i0	Anisakis	RCN41444.1	55.4	312	1.78e-103	0.000663540461523409	2.69711	Nr	RCN41444	Ion channel [Ancylostoma caninum]	356	INV	NA	Ancylostoma caninum	Ion channel
A0.A5.NODE_9958_length_2178_cov_73.269789_g4549_i0	Anisakis	KHN84938.1	72.4	468	2.73e-250	0.0153132784033524	2.69664	Nr	KHN84938	Major facilitator superfamily domain-containing protein 8 [Toxocara canis]	490	INV	mfsd8	Toxocara canis	Major facilitator superfamily domain-containing protein 8
A2.transcripts:Locus_11090_Transcript_12_23_Confidence_0.130_Length_1293	Anisakis	A0A0M3IYT5	94.2	330	3.40e-221	0.00359060994478898	2.69647	TrEMBL	A0A0M3IYT5_ANISI	NA	373	NA	NA	Anisakis simplex	CHK domain-containing protein
A0.A4.NODE_12675_length_1685_cov_9.007299_g6252_i0	Anisakis	A0A0M3KGM4	96.3	187	3.46e-123	0.0240941739815411	2.68368	TrEMBL	A0A0M3KGM4_ANISI	NA	213	NA	ASIM_LOCUS19522	Anisakis simplex	BPTI/Kunitz inhibitor domain-containing protein
A1.A4.R2446633	Anisakis	CDJ96568.1	39.8	236	3.47e-56	0.033057340942713	2.68125	Nr	CDJ96568	Protein C39E9.8, isoform d [Haemonchus contortus]	238	INV	NA	Haemonchus contortus	Protein C39E9.8, isoform d
A0.A1.NODE_27935_length_649_cov_5.231959_g14328_i0	Anisakis	KHJ41085.1	36.7	79	1.14e-06	0.0321814846598154	2.67892	Nr	KHJ41085	EB module [Trichuris suis]	621	INV	NA	Trichuris suis	EB module
A2.transcripts:Locus_3_Transcript_23083_70181_Confidence_0.000_Length_3780	Anisakis	CTP81792.1	83.9	521	0.0	0.00419352555827204	2.67591	Nr	CTP81792	BMA-LIM-9, isoform a [Brugia malayi]	737	INV	Bma-lim-9	Brugia malayi	BMA-LIM-9, isoform a
A0.A1.NODE_24632_length_844_cov_1889.931789_g4763_i2	Anisakis	A0A0M3K1N2	82.7	173	5.82e-96	3.84245747582583e-05	2.6726	TrEMBL	A0A0M3K1N2_ANISI	NA	143	NA	ASIM_LOCUS14194	Anisakis simplex	GLOBIN domain-containing protein
A2.transcripts:Locus_1360_Transcript_11_16_Confidence_0.471_Length_1185	Anisakis	KHN86646.1	73.1	216	8.68e-103	0.0110128191539704	2.67221	Nr	KHN86646	BTB and MATH domain-containing protein 42 [Toxocara canis]	331	INV	bath-42	Toxocara canis	BTB and MATH domain-containing protein 42
A2.transcripts:Locus_1265_Transcript_24_67_Confidence_0.182_Length_1100	Anisakis	RCN50842.1	47.6	254	7.09e-69	0.020062964661993	2.66746	Nr	RCN50842	serine carboxypeptidase S28 [Ancylostoma caninum]	554	INV	NA	Ancylostoma caninum	serine carboxypeptidase S28
A2.transcripts:Locus_1_Transcript_22894_107551_Confidence_0.000_Length_5499	Anisakis	KHN80504.1	79.0	733	0.0	0.0168456799258025	2.6618	Nr	KHN80504	Potassium channel subfamily T member 2 [Toxocara canis]	1124	INV	KCNT2	Toxocara canis	Potassium channel subfamily T member 2
A0.A6.NODE_282_length_6465_cov_18.914388_g193_i0	Anisakis	KHN78989.1	49.2	555	2.26e-144	0.0435323443276845	2.65314	Nr	KHN78989	FMRFamide-activated amiloride-sensitive sodium channel, partial [Toxocara canis]	527	INV	NA	Toxocara canis	FMRFamide-activated amiloride-sensitive sodium channel
A2.transcripts:Locus_3685_Transcript_3_13_Confidence_0.389_Length_3722	Anisakis	QNG62058.1	90.4	1172	0.0	0.000654302572573761	2.6513	Nr	QNG62058	P-glycoprotein 10 [Parascaris univalens]	1307	INV	NA	Parascaris univalens	P-glycoprotein 10
A2.transcripts:Locus_7334_Transcript_4_7_Confidence_0.538_Length_771	Anisakis	A0A0M3K2R5	98.8	80	6.78e-46	0.00264527182452626	2.65048	TrEMBL	A0A0M3K2R5_ANISI	NA	507	NA	ASIM_LOCUS14638	Anisakis simplex	Protein kinase domain-containing protein
A2.transcripts:Locus_24763_Transcript_3_4_Confidence_0.500_Length_278	Anisakis	SBT57149.1	89.2	65	1.24e-32	0.0228906054191297	2.64301	Nr	SBT57149	STP1 protein [Plasmodium ovale wallikeri]	1021	INV	NA	Plasmodium ovale wallikeri	STP1 protein
A0.A6.NODE_11326_length_1414_cov_142.325632_g3847_i1	Anisakis	KHN77544.1	58.6	321	5.08e-121	2.5470835148275e-09	2.64114	Nr	KHN77544	Putative serine protease F56F10.1 [Toxocara canis]	986	INV	F56F10.1	Toxocara canis	putative serine protease F56F10.1
A0.A1.NODE_17293_length_1424_cov_87.967576_g7866_i0	Anisakis	A0A0M3KD90	98.5	203	2.18e-148	4.10681206626818e-05	2.63267	TrEMBL	A0A0M3KD90_ANISI	NA	203	NA	ASIM_LOCUS18338	Anisakis simplex	Reelin domain-containing protein
A0.A5.NODE_17485_length_1460_cov_95.337332_g5234_i2	Anisakis	KHN88726.1	71.8	259	1.26e-137	0.00591064154754051	2.63169	Nr	KHN88726	Phytanoyl-CoA dioxygenase domain-containing protein 1 -like protein [Toxocara canis]	259	INV	NA	Toxocara canis	Phytanoyl-CoA dioxygenase domain-containing protein 1 -like protein
A2.transcripts:Locus_618_Transcript_30_68_Confidence_0.116_Length_680	Anisakis	KHN85848.1	79.6	167	1.08e-89	0.045031256441243	2.63008	Nr	KHN85848	Hemicentin-1 [Toxocara canis]	1056	INV	HMCN1	Toxocara canis	Hemicentin-1
A0.A5.NODE_4135_length_3248_cov_11.361310_g2034_i1	Anisakis	KHN82102.1	55.0	109	1.51e-27	0.0228650392685327	2.62709	Nr	KHN82102	Paternally-expressed protein [Toxocara canis]	3286	INV	PEG3	Toxocara canis	Paternally-expressed protein
A2.transcripts:Locus_13037_Transcript_3_3_Confidence_0.556_Length_1228	Anisakis	KHN77817.1	74.3	335	9.99e-157	0.0275705132047125	2.60912	Nr	KHN77817	DNA-binding protein D-ETS-3 [Toxocara canis]	318	INV	Ets65A	Toxocara canis	DNA-binding protein D-ETS-3
A2.transcripts:Locus_17335_Transcript_6_8_Confidence_0.250_Length_1508	Anisakis	A0A0M3JVL6	99.5	192	2.10e-119	0.00731360054130685	2.6088	TrEMBL	A0A0M3JVL6_ANISI	NA	674	NA	ASIM_LOCUS11738	Anisakis simplex	Sodium/nucleoside cotransporter
A2.transcripts:Locus_8251_Transcript_9_9_Confidence_0.516_Length_1192	Anisakis	KHN73107.1	50.1	421	6.30e-113	0.00873750587233953	2.59999	Nr	KHN73107	Collagen alpha-6(VI) chain [Toxocara canis]	2366	INV	COL6A6	Toxocara canis	Collagen alpha-6(VI) chain
A2.transcripts:Locus_1_Transcript_4486_107551_Confidence_0.000_Length_400	Anisakis	KHN77544.1	77.5	102	1.03e-50	0.000569677160224421	2.59992	Nr	KHN77544	Putative serine protease F56F10.1 [Toxocara canis]	986	INV	F56F10.1	Toxocara canis	putative serine protease F56F10.1
A2.transcripts:Locus_4728_Transcript_8_11_Confidence_0.458_Length_1254	Anisakis	KHN88726.1	70.2	171	1.20e-84	0.000663721761766556	2.59753	Nr	KHN88726	Phytanoyl-CoA dioxygenase domain-containing protein 1 -like protein [Toxocara canis]	259	INV	NA	Toxocara canis	Phytanoyl-CoA dioxygenase domain-containing protein 1 -like protein
A0.A4.NODE_16323_length_1270_cov_160.498779_g2740_i5	Anisakis	KHN89136.1	77.6	326	1.68e-186	0.0412220047608989	2.59619	Nr	KHN89136	Saccharopine dehydrogenase-like oxidoreductase [Toxocara canis]	392	INV	SCCPDH	Toxocara canis	Saccharopine dehydrogenase-like oxidoreductase
A0.A4.NODE_21422_length_796_cov_6.003974_g10613_i0	Anisakis	A0A0M3K0L1	99.3	135	3.09e-90	0.0232506790984808	2.58894	TrEMBL	A0A0M3K0L1_ANISI	NA	135	NA	ASIM_LOCUS13778	Anisakis simplex	RING-type domain-containing protein
A2.transcripts:Locus_6534_Transcript_3_8_Confidence_0.444_Length_2437	Anisakis	A0A0B2UNG9	82.2	338	2.69e-196	0.000451614365301693	2.58562	TrEMBL	A0A0B2UNG9_TOXCA	NA	338	NA	Fbp2	Toxocara canis	Fructose-bisphosphatase
A2.transcripts:Locus_1_Transcript_15778_107551_Confidence_0.000_Length_4256	Anisakis	AVV64051.1	100	957	0.0	0.0124573073854232	2.58501	Nr	AVV64051	calcium-transporting ATPase [Anisakis simplex]	1057	INV	Ca-P60A	Anisakis simplex	calcium-transporting ATPase
A2.transcripts:Locus_11404_Transcript_3_5_Confidence_0.636_Length_1590	Anisakis	A0A0M3JY34	98.7	300	2.18e-212	0.0228161665710806	2.57786	TrEMBL	A0A0M3JY34_ANISI	NA	300	NA	ASIM_LOCUS12760	Anisakis simplex	PNP_UDP_1 domain-containing protein
A2.transcripts:Locus_328_Transcript_5_8_Confidence_0.545_Length_1866	Anisakis	A0A3P7H2K5	92.5	387	8.62e-257	0.0105758410798526	2.5772	TrEMBL	A0A3P7H2K5_TOXCA	NA	396	NA	TCNE_LOCUS16488	Toxocara canis	Aminotran_1_2 domain-containing protein
A2.transcripts:Locus_22974_Transcript_1_1_Confidence_0.000_Length_1223	Anisakis	A0A0N5ALW7	61.7	253	2.08e-107	0.0456018143473565	2.57564	TrEMBL	A0A0N5ALW7_9BILA	NA	323	NA	NA	Syphacia muris	Chitin-binding type-2 domain-containing protein
A2.transcripts:Locus_2614_Transcript_63_83_Confidence_0.282_Length_2612	Anisakis	KHN78102.1	61.4	114	5.04e-32	0.00045141062385471	2.57101	Nr	KHN78102	Y-box factor -like protein [Toxocara canis]	330	INV	NA	Toxocara canis	Y-box factor -like protein
A0.A4.NODE_17627_length_1135_cov_23.957038_g4050_i1	Anisakis	KHN88009.1	68.7	268	1.98e-109	0.00030622024598222	2.56272	Nr	KHN88009	Rho guanine nucleotide exchange factor 7 [Toxocara canis]	267	INV	Arhgef7	Toxocara canis	Rho guanine nucleotide exchange factor 7
A0.A6.NODE_22159_length_511_cov_228.006224_g13746_i0	Anisakis	A0A0M3K1N2	100	42	5.68e-21	0.000235233906898704	2.56071	TrEMBL	A0A0M3K1N2_ANISI	NA	143	NA	ASIM_LOCUS14194	Anisakis simplex	GLOBIN domain-containing protein
A2.transcripts:Locus_16731_Transcript_15_24_Confidence_0.346_Length_1281	Anisakis	KAF1619451.1	53.5	342	3.56e-123	4.62692316011883e-06	2.55806	Nr	KAF1619451	putative endochitinase, partial [Eudyptes robustus]	480	VRT	cht-1	Eudyptes robustus	putative endochitinase
A0.A4.NODE_1676_length_4348_cov_33.010912_g966_i0	Anisakis	KHN79712.1	68.9	702	4.82e-283	0.0381866892080161	2.55752	Nr	KHN79712	Dystrophin-like protein 1 [Toxocara canis]	776	INV	dyc-1	Toxocara canis	Dystrophin-like protein 1
A2.transcripts:Locus_639_Transcript_17_471_Confidence_0.012_Length_1405	Anisakis	F1LB64	49.1	271	1.59e-82	0.0448798869443337	2.55723	TrEMBL	F1LB64_ASCSU	NA	193	NA	NA	Ascaris suum	Mitochondrial inner membrane protease subunit 2
A0.A1.NODE_8243_length_2499_cov_29.959704_g3996_i0	Anisakis	AXS78280.1	63.6	522	3.18e-212	0.0049003100549976	2.55133	Nr	AXS78280	Sulfate permease family protein 3 [Anisakis simplex]	627	INV	sulp-3	Anisakis simplex	Sulfate permease family protein 3
A0.A4.NODE_6677_length_2598_cov_43.142745_g3456_i0	Anisakis	KHN79267.1	57.8	377	6.30e-124	0.0119514582910676	2.53959	Nr	KHN79267	Organic solute transporter alpha-like protein 1 [Toxocara canis]	333	INV	osta-1	Toxocara canis	Organic solute transporter alpha-like protein 1
A1.A4.J2448464	Anisakis	KHN85171.1	64.9	251	7.58e-112	0.00418596864823232	2.53752	Nr	KHN85171	Beta-glucosidase 6 [Toxocara canis]	523	INV	BGLU6	Toxocara canis	Beta-glucosidase 6
A2.transcripts:Locus_10779_Transcript_4_4_Confidence_0.000_Length_2021	Anisakis	A0A0M3JTZ9	82.3	226	1.37e-122	0.0389417124822278	2.5361	TrEMBL	A0A0M3JTZ9_ANISI	NA	215	NA	ASIM_LOCUS11097	Anisakis simplex	ShKT domain-containing protein
A0.A0.NODE_13177_length_1299_cov_233.146302_g2498_i4	Anisakis	A0A0M3HN98	85.4	267	6.81e-162	0.0187647584478606	2.53365	TrEMBL	A0A0M3HN98_ASCLU	NA	566	NA	NA	Ascaris lumbricoides	Aminotran_1_2 domain-containing protein
A2.transcripts:Locus_2167_Transcript_9_38_Confidence_0.062_Length_1357	Anisakis	KHN74357.1	94.9	158	9.77e-97	0.0017366134294131	2.52105	Nr	KHN74357	ADP-ribosylation factor-like protein 8B [Toxocara canis]	185	INV	Arl8b	Toxocara canis	ADP-ribosylation factor-like protein 8B
A2.transcripts:Locus_1727_Transcript_23_41_Confidence_0.206_Length_1857	Anisakis	KHN88636.1	86.5	275	7.32e-175	3.63106173646722e-05	2.51849	Nr	KHN88636	L-2-hydroxyglutarate dehydrogenase, mitochondrial [Toxocara canis]	427	INV	NA	Toxocara canis	L-2-hydroxyglutarate dehydrogenase, mitochondrial
A2.transcripts:Locus_1843_Transcript_7_21_Confidence_0.600_Length_1694	Anisakis	A0A0M3JX15	88.8	401	6.54e-255	0.0323603378151949	2.51367	TrEMBL	A0A0M3JX15_ANISI	NA	391	NA	ASIM_LOCUS12332	Anisakis simplex	Lipase_3 domain-containing protein
A2.transcripts:Locus_24970_Transcript_4_6_Confidence_0.500_Length_1686	Anisakis	A0A0M3JY25	100	179	5.62e-110	0.0372840437347895	2.51106	TrEMBL	A0A0M3JY25_ANISI	NA	339	NA	ASIM_LOCUS12749	Anisakis simplex	Annexin
A2.transcripts:Locus_1684_Transcript_12_22_Confidence_0.238_Length_1502	Anisakis	KHN77345.1	78.1	352	8.07e-192	0.0168411355267263	2.50703	Nr	KHN77345	Glyoxylate reductase/hydroxypyruvate reductase [Toxocara canis]	332	INV	Grhpr	Toxocara canis	Glyoxylate reductase/hydroxypyruvate reductase
A0.A1.NODE_20536_length_1148_cov_21.639223_g9336_i0	Anisakis	KHN81192.1	51.4	111	5.08e-08	0.00569876212419933	2.50467	Nr	KHN81192	Calcium/calmodulin-dependent protein kinase type II [Toxocara canis]	635	INV	unc-43	Toxocara canis	Calcium/calmodulin-dependent protein kinase type II
A0.A4.NODE_3218_length_3569_cov_31.846372_g1802_i0	Anisakis	A0A0M3K460	85.1	583	0.0	0.000203525161560337	2.49777	TrEMBL	A0A0M3K460_ANISI	NA	500	NA	ASIM_LOCUS15159	Anisakis simplex	Sulfhydryl oxidase
A2.transcripts:Locus_2427_Transcript_44_121_Confidence_0.223_Length_1151	Anisakis	A0A0M3K4H9	86.0	164	1.48e-96	0.00466589851130051	2.49761	TrEMBL	A0A0M3K4H9_ANISI	NA	424	NA	ASIM_LOCUS15277	Anisakis simplex	Metallophos domain-containing protein
A2.transcripts:Locus_4_Transcript_5561_21802_Confidence_0.001_Length_12043	Anisakis	A0A016TK11	43.7	855	7.98e-227	0.0444554560919184	2.49429	TrEMBL	A0A016TK11_9BILA	NA	931	NA	Acey_s0097.g3022	Ancylostoma ceylanicum	Reverse transcriptase domain-containing protein
A2.transcripts:Locus_9990_Transcript_5_8_Confidence_0.625_Length_899	Anisakis	KHN72370.1	81.7	284	5.18e-176	0.00706018359133675	2.49137	Nr	KHN72370	Sphingomyelin synthase-related 2 [Toxocara canis]	292	INV	W07E6.3	Toxocara canis	Sphingomyelin synthase-related 2
A2.transcripts:Locus_3_Transcript_47056_70181_Confidence_0.000_Length_1185	Anisakis	A0A3P6TIT7	97.0	199	1.79e-116	0.0321877244363324	2.49014	TrEMBL	A0A3P6TIT7_ANISI	NA	215	NA	ASIM_LOCUS18855	Anisakis simplex	3HCDH_N domain-containing protein
A1.A0.J3566138	Anisakis	A0A158PNQ6	100	53	5.20e-25	0.0390344503559693	2.48901	TrEMBL	A0A158PNQ6_ANISI	NA	708	NA	ASIM_LOCUS12112	Anisakis simplex	SAM domain-containing protein
A2.transcripts:Locus_3_Transcript_60927_70181_Confidence_0.000_Length_3877	Anisakis	KHN82935.1	56.6	738	5.35e-211	0.0222579383957015	2.48847	Nr	KHN82935	Numb-related protein 1 [Toxocara canis]	714	INV	num-1	Toxocara canis	Numb-related protein 1
A0.A4.NODE_5278_length_2932_cov_245.041508_g2810_i0	Anisakis	F1KTI3	75.7	506	9.19e-292	0.000137999675395551	2.48788	TrEMBL	F1KTI3_ASCSU	NA	731	NA	NA	Ascaris suum	Procollagen-lysine 5-dioxygenase
A0.A5.NODE_25763_length_936_cov_5.695409_g11153_i0	Anisakis	NP_001367460.1	44.6	101	5.52e-10	0.0479715078799886	2.48463	Nr	NP_001367460	INSCuteable (Drososphila asymmetric cell division protein) homolog [Caenorhabditis elegans]	631	INV	insc-1	Caenorhabditis elegans	INSCuteable (Drososphila asymmetric cell division protein) homolog
A2.transcripts:Locus_13078_Transcript_4_4_Confidence_0.000_Length_1128	Anisakis	A0A0M3J5D8	98.1	107	2.05e-68	0.000561582872552944	2.48142	TrEMBL	A0A0M3J5D8_ANISI	NA	107	NA	NA	Anisakis simplex	Pepsin-I3 domain-containing protein
A2.transcripts:Locus_1_Transcript_63061_107551_Confidence_0.000_Length_1394	Anisakis	KIH67065.1	67.5	200	1.77e-94	0.0305321190470382	2.47884	Nr	KIH67065	FAH family protein [Ancylostoma duodenale]	213	INV	NA	Ancylostoma duodenale	FAH family protein
A0.A0.NODE_15042_length_1100_cov_9.919617_g8426_i0	Anisakis	A0A0M3IQE5	70.3	145	5.18e-64	0.00942504137102347	2.47102	TrEMBL	A0A0M3IQE5_ASCLU	NA	257	NA	NA	Ascaris lumbricoides	RPGR1_C domain-containing protein
A0.A1.NODE_6475_length_2822_cov_266.760073_g2969_i5	Anisakis	KHN78102.1	61.4	114	5.67e-32	0.00259350828924042	2.46418	Nr	KHN78102	Y-box factor -like protein [Toxocara canis]	330	INV	NA	Toxocara canis	Y-box factor -like protein
A0.A4.NODE_13582_length_1573_cov_10.085509_g6624_i0	Anisakis	KHJ98888.1	46.9	160	9.70e-44	0.00423422028476359	2.46169	Nr	KHJ98888	PQ loop repeat protein [Oesophagostomum dentatum]	413	INV	NA	Oesophagostomum dentatum	PQ loop repeat protein
A0.A1.NODE_21866_length_1044_cov_3.180143_g10030_i0	Anisakis	KHN73107.1	40.8	355	6.82e-62	0.00485411229411645	2.45554	Nr	KHN73107	Collagen alpha-6(VI) chain [Toxocara canis]	2366	INV	COL6A6	Toxocara canis	Collagen alpha-6(VI) chain
A0.A0.NODE_9342_length_1781_cov_13.317497_g5049_i0	Anisakis	A0A4E9F0J9	56.5	451	1.06e-145	0.00525503628897239	2.4541	TrEMBL	A0A4E9F0J9_BRUMA	NA	431	NA	Bma-gnrr-4	Brugia malayi	G_PROTEIN_RECEP_F1_2 domain-containing protein
A0.A1.NODE_9030_length_2383_cov_267.180484_g4005_i1	Anisakis	KHN83852.1	61.4	145	6.94e-44	8.18359371951992e-06	2.44948	Nr	KHN83852	Short-chain dehydrogenase/reductase family 9C member 7 [Toxocara canis]	448	INV	SDR9C7	Toxocara canis	Short-chain dehydrogenase/reductase family 9C member 7
A0.A6.NODE_3231_length_2965_cov_24.471390_g371_i2	Anisakis	KHN70614.1	44.9	768	9.99e-180	0.0307080891318303	2.43828	Nr	KHN70614	Fanconi anemia group D2 protein [Toxocara canis]	1556	INV	FANCD2	Toxocara canis	Fanconi anemia group D2 protein
A2.transcripts:Locus_258_Transcript_15_27_Confidence_0.127_Length_662	Anisakis	A0A1L5SMA4	87.7	65	1.86e-28	0.0187575116351027	2.42574	TrEMBL	A0A1L5SMA4_ANISI	NA	526	NA	AMY	Anisakis simplex	Alpha-amylase
A2.transcripts:Locus_1113_Transcript_6_8_Confidence_0.286_Length_621	Anisakis	KHN77089.1	88.1	42	1.10e-15	0.00948702924379899	2.42394	Nr	KHN77089	Dual oxidase 1 [Toxocara canis]	1439	INV	bli-3	Toxocara canis	Dual oxidase 1
A0.A6.NODE_387_length_5969_cov_51.444781_g264_i0	Anisakis	KHN79239.1	66.3	83	1.01e-22	0.00418874579565547	2.42274	Nr	KHN79239	Tyrosine-protein phosphatase vhp-1 [Toxocara canis]	264	INV	vhp-1	Toxocara canis	Tyrosine-protein phosphatase vhp-1
A2.transcripts:Locus_4380_Transcript_2_9_Confidence_0.250_Length_1169	Anisakis	KHN78690.1	79.2	240	1.88e-135	0.000347241615301686	2.42044	Nr	KHN78690	Peroxidasin -like protein [Toxocara canis]	1158	INV	pxn-1	Toxocara canis	Peroxidasin -like protein
A2.transcripts:Locus_4207_Transcript_5_12_Confidence_0.400_Length_4624	Anisakis	KHN72711.1	60.2	1172	0.0	0.0370319269733584	2.41849	Nr	KHN72711	Citron Rho-interacting kinase [Toxocara canis]	1475	INV	CIT	Toxocara canis	Citron Rho-interacting kinase
A0.A4.NODE_9368_length_2142_cov_18.144217_g4713_i0	Anisakis	A0A0M3J0L9	93.4	317	6.20e-187	0.00112690713531436	2.4179	TrEMBL	A0A0M3J0L9_ANISI	NA	320	NA	ASIM_LOCUS952	Anisakis simplex	MADF domain-containing protein
A2.transcripts:Locus_7643_Transcript_17_34_Confidence_0.138_Length_895	Anisakis	A0A0M3JT24	95.7	141	1.76e-90	0.00906724912778847	2.41694	TrEMBL	A0A0M3JT24_ANISI	NA	145	NA	ASIM_LOCUS10714	Anisakis simplex	SH3 domain-containing protein
A2.transcripts:Locus_4791_Transcript_19_23_Confidence_0.370_Length_2126	Anisakis	KHN73406.1	51.0	582	1.68e-191	0.0331682496858321	2.4152	Nr	KHN73406	Nose resistant to fluoxetine protein 6 [Toxocara canis]	672	INV	nrf-6	Toxocara canis	Nose resistant to fluoxetine protein 6
A2.transcripts:Locus_2294_Transcript_2_48_Confidence_0.017_Length_410	Anisakis	KHN75201.1	88.3	94	3.99e-44	0.0168820035790124	2.40963	Nr	KHN75201	Rap1 GTPase-activating protein 1 [Toxocara canis]	1399	INV	RAP1GAP	Toxocara canis	Rap1 GTPase-activating protein 1
A0.A6.NODE_1538_length_3954_cov_1470.007389_g987_i0	Anisakis	A0A3P6MZQ7	99.6	250	3.32e-165	0.0260668793384848	2.40666	TrEMBL	A0A3P6MZQ7_ANISI	NA	293	NA	ASIM_LOCUS509	Anisakis simplex	ELFV_dehydrog_N domain-containing protein
A0.A1.NODE_13109_length_1853_cov_98.765957_g2824_i1	Anisakis	A0A0M3JU43	99.4	361	8.90e-254	0.0417022402195904	2.40249	TrEMBL	A0A0M3JU43_ANISI	NA	361	NA	ASIM_LOCUS11146	Anisakis simplex	Beta_elim_lyase domain-containing protein
A1.A0.R3470655	Anisakis	A0A0M3JR39	100	324	1.07e-225	0.000222476841983412	2.40178	TrEMBL	A0A0M3JR39_ANISI	NA	324	NA	ASIM_LOCUS9905	Anisakis simplex	Sidoreflexin
A0.A4.NODE_23871_length_624_cov_2.428816_g12476_i0	Anisakis	KHN88770.1	53.2	201	3.39e-61	0.0387372910852858	2.40105	Nr	KHN88770	Alpha-mannosidase 2 [Toxocara canis]	968	INV	Man2a1	Toxocara canis	Alpha-mannosidase 2
A0.A0.NODE_4251_length_2824_cov_616.077645_g2300_i0	Anisakis	A0A0M3JYK8	71.3	481	4.82e-221	0.0460188222821516	2.39935	TrEMBL	A0A0M3JYK8_ANISI	NA	542	NA	ASIM_LOCUS12965	Anisakis simplex	COesterase domain-containing protein
A2.transcripts:Locus_2481_Transcript_59_81_Confidence_0.156_Length_1470	Anisakis	KHN77182.1	56.7	337	2.83e-148	0.0163484665639968	2.39388	Nr	KHN77182	MOSC domain-containing protein 1, mitochondrial [Toxocara canis]	342	INV	MARC1	Toxocara canis	MOSC domain-containing protein 1, mitochondrial
A2.transcripts:Locus_3344_Transcript_4_6_Confidence_0.333_Length_1512	Anisakis	KHN70634.1	79.1	182	4.97e-97	0.00845137579611835	2.39274	Nr	KHN70634	Alcohol dehydrogenase [NADP(+)] [Toxocara canis]	321	INV	Akr1a1	Toxocara canis	Alcohol dehydrogenase [NADP(+)]
A0.A6.NODE_9123_length_1696_cov_7.204559_g5247_i0	Anisakis	A0A0M3K4H9	76.6	432	4.85e-242	0.00091105454093503	2.3925	TrEMBL	A0A0M3K4H9_ANISI	NA	424	NA	ASIM_LOCUS15277	Anisakis simplex	Metallophos domain-containing protein
A0.A1.NODE_4216_length_3416_cov_431.779039_g2180_i0	Anisakis	KHN77544.1	70.4	388	3.66e-192	0.0148037799580612	2.39072	Nr	KHN77544	Putative serine protease F56F10.1 [Toxocara canis]	986	INV	F56F10.1	Toxocara canis	putative serine protease F56F10.1
A0.A5.NODE_25295_length_963_cov_4.002174_g10906_i0	Anisakis	A0A0B2V7V1	89.8	246	1.83e-155	0.0387372910852858	2.38949	TrEMBL	A0A0B2V7V1_TOXCA	NA	326	NA	rpn-11	Toxocara canis	26S proteasome regulatory subunit RPN11
A2.transcripts:Locus_1_Transcript_52518_107551_Confidence_0.000_Length_3064	Anisakis	KHN85497.1	51.1	472	1.93e-144	0.0366205453710894	2.38936	Nr	KHN85497	Glycine receptor subunit alpha-1 [Toxocara canis]	419	INV	GLRA1	Toxocara canis	Glycine receptor subunit alpha-1
A0.A1.NODE_8912_length_2400_cov_15.514359_g3064_i3	Anisakis	F1KWS6	29.7	182	1.53e-14	0.0266892300808663	2.38861	TrEMBL	F1KWS6_ASCSU	NA	771	NA	NA	Ascaris suum	Solute carrier organic anion transporter family member
A0.A1.NODE_16891_length_1461_cov_13.482066_g6737_i1	Anisakis	KHN82966.1	34.5	328	4.73e-41	0.00371604570204416	2.38766	Nr	KHN82966	Putative glycosyltransferase C06E1.7 [Toxocara canis]	398	INV	C06E1.7	Toxocara canis	putative glycosyltransferase C06E1.7
A2.transcripts:Locus_411_Transcript_29_37_Confidence_0.145_Length_790	Anisakis	KHN83973.1	68.7	115	6.94e-36	0.00304680741581255	2.38685	Nr	KHN83973	Contactin-associated protein-like 5 [Toxocara canis]	1105	INV	CNTNAP5	Toxocara canis	Contactin-associated protein-like 5
A0.A5.NODE_27971_length_828_cov_42.889172_g12395_i0	Anisakis	A0A0M3K9S4	95.4	65	2.87e-31	0.00178264744212873	2.38326	TrEMBL	A0A0M3K9S4_ANISI	NA	307	NA	ASIM_LOCUS17122	Anisakis simplex	Acyltransferase
A2.transcripts:Locus_4476_Transcript_8_16_Confidence_0.550_Length_1809	Anisakis	KHN74792.1	74.1	382	4.76e-213	0.00146840502122492	2.38187	Nr	KHN74792	Gelsolin-like protein 1 [Toxocara canis]	472	INV	gsnl-1	Toxocara canis	Gelsolin-like protein 1
A2.transcripts:Locus_21553_Transcript_17_27_Confidence_0.250_Length_2563	Anisakis	KHN82658.1	51.3	273	5.02e-89	0.0425725811835929	2.3795	Nr	KHN82658	Putative serine protease pcp-1 [Toxocara canis]	410	INV	pcp-1	Toxocara canis	putative serine protease pcp-1
A2.transcripts:Locus_150_Transcript_22_195_Confidence_0.002_Length_753	Anisakis	KHN71025.1	66.4	146	7.28e-58	0.00029122277693553	2.37782	Nr	KHN71025	putative transporter C38C10.2 [Toxocara canis]	350	INV	C38C10.2	Toxocara canis	putative transporter C38C10.2
A0.A0.NODE_6345_length_2297_cov_107.160125_g3356_i1	Anisakis	KHN83073.1	80.5	195	9.05e-94	0.0140638135520992	2.37351	Nr	KHN83073	Protein cueball [Toxocara canis]	446	INV	cue	Toxocara canis	Protein cueball
A2.transcripts:Locus_3_Transcript_17448_70181_Confidence_0.000_Length_3968	Anisakis	F1KRR3	84.0	674	0.0	0.0285517364160944	2.3656	TrEMBL	F1KRR3_ASCSU	Dihydrothymine dehydrogenase	1059	NA	NA	Ascaris suum	Dihydropyrimidine dehydrogenase [NADP(+)]
A2.transcripts:Locus_960_Transcript_1_113_Confidence_0.047_Length_1656	Anisakis	A0A0B2V3M7	86.4	360	4.67e-206	0.000735424168906525	2.36343	TrEMBL	A0A0B2V3M7_TOXCA	NA	378	NA	Tcan_15655	Toxocara canis	G_PROTEIN_RECEP_F1_2 domain-containing protein
A2.transcripts:Locus_469_Transcript_3_88_Confidence_0.058_Length_427	Anisakis	XP_039259107.1	43.2	81	5.57e-17	2.694833581726e-05	2.35529	Nr	XP_039259107	A disintegrin and metalloproteinase with thrombospondin motifs adt-1-like isoform X3 [Styela clava]	1167	INV	LOC120335631	Styela clava	A disintegrin and metalloproteinase with thrombospondin motifs adt-1-like isoform X3
A2.transcripts:Locus_160_Transcript_7_17_Confidence_0.357_Length_1050	Anisakis	A0A0M3JR39	84.7	85	1.03e-36	0.00950807646223846	2.35228	TrEMBL	A0A0M3JR39_ANISI	NA	324	NA	ASIM_LOCUS9905	Anisakis simplex	Sidoreflexin
A2.transcripts:Locus_3_Transcript_26734_70181_Confidence_0.000_Length_3261	Anisakis	KHN82728.1	71.1	426	1.88e-204	0.0351814883289934	2.35206	Nr	KHN82728	Gamma-glutamyltranspeptidase 1 [Toxocara canis]	825	INV	GGT1	Toxocara canis	Gamma-glutamyltranspeptidase 1
A2.transcripts:Locus_8902_Transcript_2_4_Confidence_0.200_Length_782	Anisakis	CDQ07981.1	50.4	121	5.77e-35	0.0133071574093838	2.34983	Nr	CDQ07981	Bm12312, isoform a, partial [Brugia malayi]	142	INV	Bm12312	Brugia malayi	Bm12312, isoform a
A2.transcripts:Locus_1680_Transcript_6_13_Confidence_0.294_Length_1686	Anisakis	AFG25518.1	86.1	36	1.34e-12	0.0241041251861152	2.3486	Nr	AFG25518	Kruppel-like factor 4, partial [Capra hircus]	38	MAM	KLF4	Capra hircus	Kruppel-like factor 4
A0.A5.NODE_22105_length_1147_cov_252.892210_g7644_i1	Anisakis	KHN75744.1	44.7	309	8.41e-83	0.00361669390652779	2.34806	Nr	KHN75744	Bifunctional nitrilase/nitrile hydratase NIT4B, partial [Toxocara canis]	647	INV	NIT4B	Toxocara canis	Bifunctional nitrilase/nitrile hydratase NIT4B
A2.transcripts:Locus_378_Transcript_22_79_Confidence_0.311_Length_3576	Anisakis	KHN77544.1	71.6	472	1.36e-246	0.00892857185382614	2.34143	Nr	KHN77544	Putative serine protease F56F10.1 [Toxocara canis]	986	INV	F56F10.1	Toxocara canis	putative serine protease F56F10.1
A0.A1.NODE_14011_length_1754_cov_18.227623_g6496_i0	Anisakis	XP_033812043.1	26.7	172	7.41e-06	0.0206949646267968	2.3358	Nr	XP_033812043	microtubule-associated proteins 1A/1B light chain 3C-like isoform X3 [Geotrypetes seraphini]	120	VRT	LOC117365603	Geotrypetes seraphini	microtubule-associated proteins 1A/1B light chain 3C-like isoform X3
A1.A1.R3384738	Anisakis	A0A0M3JTN5	86.2	412	3.41e-249	0.0014057317397941	2.33409	TrEMBL	A0A0M3JTN5_ANISI	NA	418	NA	ASIM_LOCUS10968	Anisakis simplex	Neur_chan_LBD domain-containing protein
A0.A4.NODE_8699_length_2244_cov_51.012710_g3215_i1	Anisakis	KHN82794.1	38.5	109	2.61e-07	0.0470355409498523	2.33244	Nr	KHN82794	Alpha-crystallin B chain [Toxocara canis]	600	INV	CRYAB	Toxocara canis	Alpha-crystallin B chain
A1.A1.R3417509	Anisakis	KHN73107.1	61.2	286	3.12e-104	0.00295091458502407	2.33139	Nr	KHN73107	Collagen alpha-6(VI) chain [Toxocara canis]	2366	INV	COL6A6	Toxocara canis	Collagen alpha-6(VI) chain
A2.transcripts:Locus_1_Transcript_83677_107551_Confidence_0.000_Length_1968	Anisakis	A0A0B2VNX2	61.4	285	1.07e-98	0.0327954919781546	2.32878	TrEMBL	A0A0B2VNX2_TOXCA	NA	536	NA	Mospd2	Toxocara canis	Major sperm protein
A2.transcripts:Locus_2645_Transcript_18_26_Confidence_0.145_Length_2086	Anisakis	KHN76102.1	58.7	646	8.56e-202	0.000833994346716362	2.32725	Nr	KHN76102	E3 ubiquitin-protein ligase PDZRN3 [Toxocara canis]	663	INV	Pdzrn3	Toxocara canis	E3 ubiquitin-protein ligase PDZRN3
A2.transcripts:Locus_149_Transcript_19_28_Confidence_0.130_Length_1388	Anisakis	KHN78820.1	90.7	301	1.24e-180	0.0228285901992492	2.32715	Nr	KHN78820	Nucleolysin TIAR [Toxocara canis]	526	INV	TIAL1	Toxocara canis	Nucleolysin TIAR
A0.A4.NODE_9837_length_2065_cov_1673.730731_g4928_i0	Anisakis	KHN75849.1	76.0	296	2.72e-169	0.0215136292676041	2.31258	Nr	KHN75849	Testican-3 [Toxocara canis]	350	INV	Spock3	Toxocara canis	Testican-3
A0.A4.NODE_15615_length_1340_cov_17.173980_g7516_i0	Anisakis	CDQ07981.1	50.4	121	3.68e-33	0.00117210809438246	2.31233	Nr	CDQ07981	Bm12312, isoform a, partial [Brugia malayi]	142	INV	Bm12312	Brugia malayi	Bm12312, isoform a
A2.transcripts:Locus_2181_Transcript_6_8_Confidence_0.455_Length_857	Anisakis	A0A0M3K6I6	86.0	50	2.48e-16	0.0218835430673955	2.30865	TrEMBL	A0A0M3K6I6_ANISI	NA	300	NA	ASIM_LOCUS15984	Anisakis simplex	VWFA domain-containing protein
A2.transcripts:Locus_2077_Transcript_6_7_Confidence_0.706_Length_3555	Anisakis	KHN85483.1	73.0	356	1.42e-179	0.0015378513774304	2.30603	Nr	KHN85483	Phosphatidylcholine:ceramide cholinephosphotransferase 1 [Toxocara canis]	342	INV	sms-1	Toxocara canis	Phosphatidylcholine:ceramide cholinephosphotransferase 1
A2.transcripts:Locus_3330_Transcript_1_3_Confidence_0.750_Length_1392	Anisakis	KHN87264.1	77.8	482	1.64e-269	0.00312136026054389	2.30549	Nr	KHN87264	Acetylcholine receptor subunit alpha-type des-2 [Toxocara canis]	506	INV	des-2	Toxocara canis	Acetylcholine receptor subunit alpha-type des-2
A0.A4.NODE_7596_length_2435_cov_38.514202_g3415_i1	Anisakis	AXS78280.1	76.6	589	1.42e-314	2.10456787418676e-06	2.30176	Nr	AXS78280	Sulfate permease family protein 3 [Anisakis simplex]	627	INV	sulp-3	Anisakis simplex	Sulfate permease family protein 3
A0.A1.NODE_2625_length_4086_cov_35.409057_g1372_i1	Anisakis	A0A0M3IYN6	97.1	272	1.01e-164	0.0169372716969853	2.30068	TrEMBL	A0A0M3IYN6_ANISI	NA	392	NA	ASIM_LOCUS269	Anisakis simplex	HTH CENPB-type domain-containing protein
A2.transcripts:Locus_19313_Transcript_7_15_Confidence_0.485_Length_901	Anisakis	KHN74330.1	71.8	124	1.65e-59	0.0111461350762554	2.29618	Nr	KHN74330	Myosin-2 essential light chain [Toxocara canis]	148	INV	Mlc-c	Toxocara canis	Myosin-2 essential light chain
A0.A4.NODE_9768_length_2077_cov_34.761297_g4890_i0	Anisakis	A0A0B2W2A9	49.7	495	2.76e-176	0.0222579383957015	2.2901	TrEMBL	A0A0B2W2A9_TOXCA	NA	501	NA	ugt3	Toxocara canis	UDP-glucuronosyltransferase
A0.A0.NODE_14432_length_1160_cov_12332.610860_g7355_i1	Anisakis	KHN73958.1	67.5	243	1.02e-98	0.000897704642517319	2.28703	Nr	KHN73958	Acetyl-CoA acetyltransferase A, mitochondrial [Toxocara canis]	811	INV	acat1-a	Toxocara canis	Acetyl-CoA acetyltransferase A, mitochondrial
A2.transcripts:Locus_21995_Transcript_2_2_Confidence_0.000_Length_693	Anisakis	A0A4U5NJY1	40.6	138	1.08e-26	0.0352414680769335	2.28469	TrEMBL	A0A4U5NJY1_STECR	NA	260	NA	L596_016731	Steinernema carpocapsae	EB domain-containing protein
A2.transcripts:Locus_2096_Transcript_2_38_Confidence_0.581_Length_4937	Anisakis	A0A0M3JV53	97.6	123	1.13e-72	3.12760052147915e-05	2.28324	TrEMBL	A0A0M3JV53_ANISI	NA	128	NA	ASIM_LOCUS11559	Anisakis simplex	SHSP domain-containing protein
A0.A1.NODE_4458_length_3343_cov_29.111416_g2306_i0	Anisakis	A0A0M3I2K1	32.4	287	1.82e-30	0.000106596184690731	2.28223	TrEMBL	A0A0M3I2K1_ASCLU	NA	290	NA	NA	Ascaris lumbricoides	Glycine N-acyltransferase-like protein
A2.transcripts:Locus_3_Transcript_47751_70181_Confidence_0.000_Length_1055	Anisakis	A0A0M3K6I6	94.7	114	1.51e-61	0.0244026801965028	2.28095	TrEMBL	A0A0M3K6I6_ANISI	NA	300	NA	ASIM_LOCUS15984	Anisakis simplex	VWFA domain-containing protein
A2.transcripts:Locus_7638_Transcript_15_29_Confidence_0.158_Length_1001	Anisakis	A0A0B2V012	96.0	173	5.01e-120	0.0403870679163045	2.28078	TrEMBL	A0A0B2V012_TOXCA	NA	195	NA	Tcan_06933	Toxocara canis	COesterase domain-containing protein
A2.transcripts:Locus_10439_Transcript_1_2_Confidence_0.750_Length_2711	Anisakis	KHN77944.1	49.8	440	2.58e-119	0.00489255986371528	2.2806	Nr	KHN77944	TWiK family of potassium channels protein 9 [Toxocara canis]	449	INV	twk-9	Toxocara canis	TWiK family of potassium channels protein 9
A0.A1.NODE_17961_length_1363_cov_8.633488_g8165_i0	Anisakis	OZC08128.1	63.0	73	5.54e-28	0.00564144635615209	2.27944	Nr	OZC08128	crustacean CHH/MIH/GIH neurohormone family protein [Onchocerca flexuosa]	105	INV	NA	Onchocerca flexuosa	crustacean CHH/MIH/GIH neurohormone family protein
A0.A4.NODE_23941_length_619_cov_34.083045_g12538_i0	Anisakis	A0A0M3K6L2	100	147	8.87e-101	0.000359539311600027	2.26086	TrEMBL	A0A0M3K6L2_ANISI	Cyanate hydrolase	147	NA	ASIM_LOCUS16010	Anisakis simplex	Cyanate hydratase
A2.transcripts:Locus_4569_Transcript_4_12_Confidence_0.250_Length_2171	Anisakis	F1KT53	76.7	523	4.56e-275	6.30764358744646e-05	2.25903	TrEMBL	F1KT53_ASCSU	NA	935	NA	NA	Ascaris suum	Moesin/ezrin/radixin homolog 1
A2.transcripts:Locus_3_Transcript_27374_70181_Confidence_0.000_Length_1984	Anisakis	KHN83338.1	90.7	300	1.33e-200	0.00608287127020648	2.25774	Nr	KHN83338	UPF0046 protein T07D4.2 [Toxocara canis]	329	INV	T07D4.2	Toxocara canis	UPF0046 protein T07D4.2
A2.transcripts:Locus_2151_Transcript_22_24_Confidence_0.227_Length_708	Anisakis	A0A0M3K9S4	98.4	127	9.18e-88	0.034955495569811	2.25598	TrEMBL	A0A0M3K9S4_ANISI	NA	307	NA	ASIM_LOCUS17122	Anisakis simplex	Acyltransferase
A1.A1.R3323973	Anisakis	F1KW74	70.4	768	0.0	0.0042612605475956	2.2551	TrEMBL	F1KW74_ASCSU	NA	777	NA	NA	Ascaris suum	Aminopeptidase
A2.transcripts:Locus_3_Transcript_39623_70181_Confidence_0.000_Length_1300	Anisakis	A0A0B2UXD9	93.3	165	1.84e-102	0.0338387706960156	2.25443	TrEMBL	A0A0B2UXD9_TOXCA	NA	213	NA	erd-2	Toxocara canis	ER lumen protein-retaining receptor
A2.transcripts:Locus_9261_Transcript_17_28_Confidence_0.364_Length_683	Anisakis	KHN84938.1	81.0	42	1.91e-13	1.56258780287182e-05	2.25021	Nr	KHN84938	Major facilitator superfamily domain-containing protein 8 [Toxocara canis]	490	INV	mfsd8	Toxocara canis	Major facilitator superfamily domain-containing protein 8
A2.transcripts:Locus_7549_Transcript_8_9_Confidence_0.474_Length_2290	Anisakis	A0A0M3KAE3	99.1	320	3.10e-219	8.01336057113875e-05	2.24941	TrEMBL	A0A0M3KAE3_ANISI	NA	320	NA	ASIM_LOCUS17341	Anisakis simplex	Transaldolase
A0.A1.NODE_16586_length_1490_cov_543.120169_g1357_i1	Anisakis	A0A0M3JQZ6	98.9	92	1.23e-42	0.00229239655244538	2.24632	TrEMBL	A0A0M3JQZ6_ANISI	NA	963	NA	ASIM_LOCUS9849	Anisakis simplex	Alanine--tRNA ligase
A1.A1.R3298533	Anisakis	KHN82712.1	95.9	171	1.25e-101	0.000222476841983412	2.24282	Nr	KHN82712	Myosin regulatory light chain 1 [Toxocara canis]	171	INV	mlc-1	Toxocara canis	Myosin regulatory light chain 1
A0.A1.NODE_2226_length_4299_cov_84.581522_g1197_i0	Anisakis	KHN87034.1	43.7	286	1.73e-61	0.024620001863493	2.23645	Nr	KHN87034	Putative small intestine sodium-dependent phosphate transport protein [Toxocara canis]	409	INV	Slc17a4	Toxocara canis	putative small intestine sodium-dependent phosphate transport protein
A2.transcripts:Locus_904_Transcript_40_61_Confidence_0.014_Length_681	Anisakis	A0A0M3JSD0	100	60	5.25e-39	0.0216052457828907	2.23645	TrEMBL	A0A0M3JSD0_ANISI	NA	60	NA	ASIM_LOCUS10432	Anisakis simplex	Brain protein I3
A0.A4.NODE_17711_length_1127_cov_5.133517_g8520_i0	Anisakis	KHN81191.1	59.8	239	2.24e-93	0.0124789774654774	2.22751	Nr	KHN81191	Neuroglobin [Toxocara canis]	281	INV	ngb	Toxocara canis	Neuroglobin
A2.transcripts:Locus_4111_Transcript_9_11_Confidence_0.353_Length_1608	Anisakis	F1L7K3	66.9	278	9.24e-132	0.000102069373825046	2.22728	TrEMBL	F1L7K3_ASCSU	NA	462	NA	NA	Ascaris suum	Legumain
A2.transcripts:Locus_14639_Transcript_2_3_Confidence_0.333_Length_2534	Anisakis	KHN73107.1	51.3	846	4.18e-237	0.0205981064787763	2.22303	Nr	KHN73107	Collagen alpha-6(VI) chain [Toxocara canis]	2366	INV	COL6A6	Toxocara canis	Collagen alpha-6(VI) chain
A1.A0.J3920656	Anisakis	KHN85171.1	74.1	58	1.65e-21	0.00572790747131777	2.22271	Nr	KHN85171	Beta-glucosidase 6 [Toxocara canis]	523	INV	BGLU6	Toxocara canis	Beta-glucosidase 6
A2.transcripts:Locus_1365_Transcript_61_288_Confidence_0.023_Length_2563	Anisakis	XP_020305635.1	40.5	524	9.31e-118	0.0218745556900157	2.22164	Nr	XP_020305635	CBR-ITX-1 protein, partial [Loa loa]	1054	INV	NA	Loa loa	CBR-ITX-1 protein
A0.A4.NODE_7774_length_2401_cov_96.231780_g3983_i0	Anisakis	KHN84938.1	67.7	266	5.91e-122	0.00873750587233953	2.21767	Nr	KHN84938	Major facilitator superfamily domain-containing protein 8 [Toxocara canis]	490	INV	mfsd8	Toxocara canis	Major facilitator superfamily domain-containing protein 8
A2.transcripts:Locus_3_Transcript_8398_70181_Confidence_0.000_Length_1542	Anisakis	XP_001895274.1	82.0	150	6.01e-94	0.0476861257521561	2.21358	Nr	XP_001895274	Thyroglobulin type-1 repeat family protein, partial [Brugia malayi]	155	INV	NA	Brugia malayi	Thyroglobulin type-1 repeat family protein
A2.transcripts:Locus_1547_Transcript_10_12_Confidence_0.471_Length_3214	Anisakis	KHN77886.1	67.4	921	0.0	0.00275315659703237	2.21324	Nr	KHN77886	Putative tyrosine-protein kinase F09A5.2 [Toxocara canis]	969	INV	F09A5.2	Toxocara canis	putative tyrosine-protein kinase F09A5.2
A1.A5.R3308048	Anisakis	P0CG47.1	59.3	182	2.94e-58	0.0406981812687634	2.20784	Swiss-Prot	UBB_HUMAN	RecName: Full=Polyubiquitin-B; Contains: RecName: Full=Ubiquitin; Flags: Precursor	229	PRI	NA	Homo sapiens	Polyubiquitin-B
A0.A5.NODE_13957_length_1745_cov_74.159224_g6136_i0	Anisakis	A0A0M3I2K1	27.4	296	1.41e-20	0.0233552628560138	2.19607	TrEMBL	A0A0M3I2K1_ASCLU	NA	290	NA	NA	Ascaris lumbricoides	Glycine N-acyltransferase-like protein
A2.transcripts:Locus_19967_Transcript_33_59_Confidence_0.342_Length_1324	Anisakis	CDP98532.2	43.5	69	1.02e-07	0.00767317621681123	2.19426	Nr	CDP98532	Bm10529, isoform b [Brugia malayi]	74	INV	Bm10529	Brugia malayi	Bm10529, isoform b
A0.A1.NODE_7560_length_2618_cov_112.464132_g1965_i1	Anisakis	F1KT53	77.0	530	9.91e-278	1.27980542341814e-05	2.19316	TrEMBL	F1KT53_ASCSU	NA	935	NA	NA	Ascaris suum	Moesin/ezrin/radixin homolog 1
A0.A1.NODE_7622_length_2607_cov_249.834646_g3727_i0	Anisakis	KHN85808.1	44.1	782	8.39e-195	0.0130774476586392	2.19294	Nr	KHN85808	Tripartite motif-containing protein 59 [Toxocara canis]	609	INV	TRIM59	Toxocara canis	Tripartite motif-containing protein 59
A0.A4.NODE_9513_length_2119_cov_62.859480_g4773_i0	Anisakis	A0A158PPD0	94.6	558	0.0	0.019682894165884	2.18942	TrEMBL	A0A158PPD0_ANISI	NA	558	NA	ASIM_LOCUS13611	Anisakis simplex	Beta-hexosaminidase
A0.A1.NODE_20614_length_1141_cov_179.602421_g9380_i0	Anisakis	A0A0M3JWG7	46.8	237	8.38e-45	0.000644616589202194	2.18782	TrEMBL	A0A0M3JWG7_ANISI	Phosphodeoxyriboaldolase	291	NA	ASIM_LOCUS12088	Anisakis simplex	2-deoxy-D-ribose 5-phosphate aldolase
A0.A5.NODE_31973_length_666_cov_2.162119_g14997_i0	Anisakis	F1KWS6	45.0	100	4.88e-19	0.00360601706450658	2.18418	TrEMBL	F1KWS6_ASCSU	NA	771	NA	NA	Ascaris suum	Solute carrier organic anion transporter family member
A1.A5.J3349848	Anisakis	KHN87065.1	43.9	139	8.59e-28	0.00839761649860105	2.18366	Nr	KHN87065	Prominin-1 [Toxocara canis]	794	INV	Prom1	Toxocara canis	Prominin-1
A2.transcripts:Locus_651_Transcript_67_89_Confidence_0.046_Length_2152	Anisakis	A0A2R4KRP1	93.1	304	6.77e-180	0.034955495569811	2.18019	TrEMBL	A0A2R4KRP1_ANISI	NA	498	NA	DLD	Anisakis simplex	Dihydrolipoyl dehydrogenase
A0.A4.NODE_15798_length_1322_cov_6.214676_g7603_i0	Anisakis	A0A0M3K454	69.4	284	2.87e-126	0.0179556613073505	2.17681	TrEMBL	A0A0M3K454_ANISI	NA	234	NA	ASIM_LOCUS15152	Anisakis simplex	Hexosyltransferase
A2.transcripts:Locus_7721_Transcript_10_13_Confidence_0.133_Length_2986	Anisakis	A0A0B2VPP0	61.4	495	5.31e-212	0.00416242790853809	2.17164	TrEMBL	A0A0B2VPP0_TOXCA	NA	495	NA	UGT2C1	Toxocara canis	UDP-glucuronosyltransferase
A2.transcripts:Locus_12169_Transcript_1_24_Confidence_0.012_Length_644	Anisakis	A0A0M3JZI7	98.1	103	8.47e-64	0.000383527218365423	2.16654	TrEMBL	A0A0M3JZI7_ANISI	NA	116	NA	ASIM_LOCUS13349	Anisakis simplex	FGGY_C domain-containing protein
A2.transcripts:Locus_1_Transcript_70365_107551_Confidence_0.000_Length_1790	Anisakis	A0A0M3JXY6	100	292	2.70e-210	0.0326715023658249	2.1658	TrEMBL	A0A0M3JXY6_ANISI	NA	364	NA	ASIM_LOCUS12701	Anisakis simplex	Pyruvate dehydrogenase E1 component subunit beta
A2.transcripts:Locus_451_Transcript_70_239_Confidence_0.016_Length_740	Anisakis	F1LFN6	78.9	147	6.91e-80	0.0123444638036696	2.16425	TrEMBL	F1LFN6_ASCSU	NA	219	NA	NA	Ascaris suum	Nitroreductase domain-containing protein
A2.transcripts:Locus_11110_Transcript_2_7_Confidence_0.333_Length_642	Anisakis	A0A0M3JK46	77.8	90	2.48e-34	0.0461572256565451	2.16421	TrEMBL	A0A0M3JK46_ANISI	NA	206	NA	ASIM_LOCUS7779	Anisakis simplex	HTH CENPB-type domain-containing protein
A0.A5.NODE_4318_length_3186_cov_52.116767_g2117_i1	Anisakis	A0A0M3K460	60.4	503	1.90e-189	0.000207430451304267	2.16242	TrEMBL	A0A0M3K460_ANISI	NA	500	NA	ASIM_LOCUS15159	Anisakis simplex	Sulfhydryl oxidase
A0.A0.NODE_12358_length_1389_cov_33.184408_g5261_i3	Anisakis	A0A0M3I2K1	27.5	291	1.33e-24	0.0244528410390345	2.16087	TrEMBL	A0A0M3I2K1_ASCLU	NA	290	NA	NA	Ascaris lumbricoides	Glycine N-acyltransferase-like protein
A2.transcripts:Locus_3746_Transcript_8_20_Confidence_0.471_Length_1471	Anisakis	A0A183UTK0	77.8	284	8.67e-167	0.00591003466454328	2.1606	TrEMBL	A0A183UTK0_TOXCA	NA	283	NA	TCNE_LOCUS11820	Toxocara canis	Galectin
A0.A6.NODE_13019_length_1221_cov_65.749161_g1220_i2	Anisakis	KHN84383.1	81.7	230	7.11e-119	0.0244589890133078	2.15964	Nr	KHN84383	Collagen alpha-1(XVIII) chain [Toxocara canis]	1149	INV	COL18A1	Toxocara canis	Collagen alpha-1(XVIII) chain
A0.A1.NODE_19938_length_1197_cov_60.634513_g9039_i0	Anisakis	AAD31000.1	52.7	148	2.94e-46	0.033551577271893	2.15943	Nr	AF126830_1	C-type lectin Tc-ctl-4 [Toxocara canis]	288	INV	NA	Toxocara canis	C-type lectin Tc-ctl-4
A0.A0.NODE_5125_length_2581_cov_457.990103_g2772_i0	Anisakis	KHN72551.1	85.8	120	2.86e-63	0.010907123980633	2.15751	Nr	KHN72551	Protein slowmo -like protein 2 [Toxocara canis]	194	INV	SLMO2	Toxocara canis	Protein slowmo -like protein 2
A2.transcripts:Locus_345_Transcript_78_103_Confidence_0.089_Length_2105	Anisakis	KHN80287.1	84.0	81	6.86e-31	0.0348288342834569	2.15416	Nr	KHN80287	putative 26S proteasome complex subunit dss-1 [Toxocara canis]	79	INV	dss-1	Toxocara canis	putative 26S proteasome complex subunit dss-1
A1.A0.R3473721	Anisakis	A0A0B2UXD0	74.3	495	6.40e-241	0.00427337323450137	2.14442	TrEMBL	A0A0B2UXD0_TOXCA	Prostaglandin reductase 2	427	NA	PTGR2	Toxocara canis	15-oxoprostaglandin 13-reductase
A2.transcripts:Locus_2433_Transcript_21_35_Confidence_0.509_Length_2136	Anisakis	KHN72139.1	59.0	322	2.65e-121	0.0440757727654527	2.14435	Nr	KHN72139	Transmembrane protein 53 [Toxocara canis]	307	INV	TMEM53	Toxocara canis	Transmembrane protein 53
A0.A0.NODE_7512_length_2070_cov_78.224318_g4030_i0	Anisakis	KHN81970.1	55.3	619	8.75e-229	0.0119731275999577	2.14269	Nr	KHN81970	Major facilitator superfamily domain-containing protein 8 [Toxocara canis]	543	INV	mfsd8	Toxocara canis	Major facilitator superfamily domain-containing protein 8
A2.transcripts:Locus_3_Transcript_67218_70181_Confidence_0.000_Length_2125	Anisakis	KHN76800.1	48.6	658	4.65e-195	0.0177913541666547	2.13987	Nr	KHN76800	Putative tyrosinase-like protein tyr-3 [Toxocara canis]	708	INV	tyr-3	Toxocara canis	putative tyrosinase-like protein tyr-3
A2.transcripts:Locus_9223_Transcript_10_19_Confidence_0.464_Length_2318	Anisakis	F1KWS6	27.4	646	2.26e-66	0.0206949646267968	2.13304	TrEMBL	F1KWS6_ASCSU	NA	771	NA	NA	Ascaris suum	Solute carrier organic anion transporter family member
A0.A1.NODE_9963_length_2243_cov_91.945312_g3111_i1	Anisakis	A0A0B2UWF9	83.0	370	3.68e-205	0.0430238206942151	2.12831	TrEMBL	A0A0B2UWF9_TOXCA	NA	381	NA	sup-9	Toxocara canis	Two pore potassium channel protein sup-9
A0.A4.NODE_11703_length_1808_cov_10.550085_g5783_i0	Anisakis	A0A0M3K4H9	72.9	451	1.82e-239	0.000525109385324257	2.12503	TrEMBL	A0A0M3K4H9_ANISI	NA	424	NA	ASIM_LOCUS15277	Anisakis simplex	Metallophos domain-containing protein
A1.A0.R3477714	Anisakis	KHN85483.1	72.8	356	1.69e-177	0.00525661549534141	2.11654	Nr	KHN85483	Phosphatidylcholine:ceramide cholinephosphotransferase 1 [Toxocara canis]	342	INV	sms-1	Toxocara canis	Phosphatidylcholine:ceramide cholinephosphotransferase 1
A0.A5.NODE_2691_length_3782_cov_567.717037_g1368_i0	Anisakis	A0A0M3KE73	99.5	191	1.11e-126	0.036746228817278	2.1141	TrEMBL	A0A0M3KE73_ANISI	Very-long-chain 3-oxoacyl-CoA synthase	209	NA	ASIM_LOCUS18671	Anisakis simplex	Elongation of very long chain fatty acids protein
A2.transcripts:Locus_802_Transcript_7_87_Confidence_0.150_Length_1340	Anisakis	XP_001897090.1	33.1	136	5.87e-12	0.0236525359730603	2.11255	Nr	XP_001897090	Zinc finger, C2H2 type family protein [Brugia malayi]	293	INV	NA	Brugia malayi	Zinc finger, C2H2 type family protein
A0.A1.NODE_20594_length_1143_cov_62.654275_g9365_i0	Anisakis	A0A0M3I2K1	30.1	286	2.97e-32	0.0204487049517819	2.11004	TrEMBL	A0A0M3I2K1_ASCLU	NA	290	NA	NA	Ascaris lumbricoides	Glycine N-acyltransferase-like protein
A2.transcripts:Locus_3_Transcript_15172_70181_Confidence_0.000_Length_4277	Anisakis	A0A0M3K3X3	90.9	850	0.0	0.00384741259047014	2.10669	TrEMBL	A0A0M3K3X3_ANISI	NA	783	NA	ASIM_LOCUS15071	Anisakis simplex	GRIP domain-containing protein
A0.A1.NODE_16435_length_1506_cov_10.237665_g7504_i0	Anisakis	XP_001900825.1	60.3	204	6.68e-79	0.026712951583035	2.10154	Nr	XP_001900825	CG3579-PA [Brugia malayi]	217	INV	NA	Brugia malayi	CG3579-PA
A2.transcripts:Locus_4738_Transcript_10_15_Confidence_0.353_Length_368	Anisakis	F1KR29	59.5	42	5.45e-06	0.0431724725703623	2.10123	TrEMBL	F1KR29_ASCSU	Eukaryotic translation initiation factor 3 subunit 8	908	NA	NA	Ascaris suum	Eukaryotic translation initiation factor 3 subunit C
A2.transcripts:Locus_22819_Transcript_8_9_Confidence_0.500_Length_2457	Anisakis	KHN78740.1	92.1	787	0.0	0.000526085430209396	2.09689	Nr	KHN78740	Alpha-catulin [Toxocara canis]	883	INV	Ctnnal1	Toxocara canis	Alpha-catulin
A0.A4.NODE_896_length_5054_cov_120.557949_g520_i0	Anisakis	KHN75750.1	62.2	1011	3.49e-315	0.0029351658839389	2.09393	Nr	KHN75750	Aspartyl/asparaginyl beta-hydroxylase [Toxocara canis]	852	INV	Asph	Toxocara canis	Aspartyl/asparaginyl beta-hydroxylase
A2.transcripts:Locus_879_Transcript_36_62_Confidence_0.366_Length_5264	Anisakis	KHN82929.1	50.0	1068	9.00e-303	4.35467158465782e-06	2.09097	Nr	KHN82929	Midasin [Toxocara canis]	3669	INV	MDN1	Toxocara canis	Midasin
A2.transcripts:Locus_863_Transcript_4_7_Confidence_0.250_Length_2437	Anisakis	XP_020302968.1	74.6	351	9.84e-183	3.07807283388349e-05	2.08373	Nr	XP_020302968	ribonucleoside-diphosphate reductase [Loa loa]	365	INV	NA	Loa loa	ribonucleoside-diphosphate reductase
A0.A4.NODE_971_length_4975_cov_24.208350_g558_i0	Anisakis	QNG62058.1	90.4	1307	0.0	0.0046982524428257	2.08174	Nr	QNG62058	P-glycoprotein 10 [Parascaris univalens]	1307	INV	NA	Parascaris univalens	P-glycoprotein 10
A2.transcripts:Locus_2312_Transcript_47_77_Confidence_0.078_Length_1292	Anisakis	KHN80900.1	76.4	263	4.29e-139	0.0177882188596941	2.07499	Nr	KHN80900	putative D-lactate dehydrogenase, mitochondrial [Toxocara canis]	820	INV	LDHD	Toxocara canis	putative D-lactate dehydrogenase, mitochondrial
A2.transcripts:Locus_3_Transcript_36611_70181_Confidence_0.000_Length_2525	Anisakis	A0A0B2UW93	85.8	338	1.98e-203	0.0271483347121374	2.07084	TrEMBL	A0A0B2UW93_TOXCA	NA	339	NA	Fbp2	Toxocara canis	Fructose-bisphosphatase
A2.transcripts:Locus_3_Transcript_58995_70181_Confidence_0.000_Length_1059	Anisakis	KHN81881.1	76.4	225	2.80e-123	0.00356038821269294	2.07063	Nr	KHN81881	Failed axon connections -like protein [Toxocara canis]	311	INV	FAXC	Toxocara canis	Failed axon connections -like protein
A2.transcripts:Locus_1740_Transcript_39_42_Confidence_0.388_Length_2216	Anisakis	CDJ97188.1	49.3	460	8.87e-151	0.0392172818944529	2.06497	Nr	CDJ97188	Peptidase S28 domain containing protein [Haemonchus contortus]	503	INV	NA	Haemonchus contortus	Peptidase S28 domain containing protein
A2.transcripts:Locus_3690_Transcript_4_6_Confidence_0.192_Length_3290	Anisakis	A0A0M3JVL6	99.3	446	1.44e-300	0.0338610507485041	2.06433	TrEMBL	A0A0M3JVL6_ANISI	NA	674	NA	ASIM_LOCUS11738	Anisakis simplex	Sodium/nucleoside cotransporter
A0.A3.NODE_6334_length_968_cov_24.489883_g5075_i0	Anisakis	A0A0M3JT24	98.4	64	4.97e-33	0.00152868831687306	2.06285	TrEMBL	A0A0M3JT24_ANISI	NA	145	NA	ASIM_LOCUS10714	Anisakis simplex	SH3 domain-containing protein
A1.A2.J740198	Anisakis	A0A0M3JZF1	97.3	37	3.73e-14	0.0150034362890771	2.0621	TrEMBL	A0A0M3JZF1_ANISI	NA	481	NA	ASIM_LOCUS13305	Anisakis simplex	Fatty-acid and retinol-binding protein 1
A0.A4.NODE_335_length_6027_cov_233.126128_g184_i0	Anisakis	KHN74327.1	74.4	710	0.0	0.0170545487505837	2.06059	Nr	KHN74327	Acetyl-CoA carboxylase [Toxocara canis]	2150	INV	ACAC	Toxocara canis	Acetyl-CoA carboxylase
A2.transcripts:Locus_3126_Transcript_56_67_Confidence_0.136_Length_1323	Anisakis	KHN83338.1	90.7	300	4.24e-204	0.0156925110632658	2.05632	Nr	KHN83338	UPF0046 protein T07D4.2 [Toxocara canis]	329	INV	T07D4.2	Toxocara canis	UPF0046 protein T07D4.2
A2.transcripts:Locus_1_Transcript_96916_107551_Confidence_0.000_Length_311	Anisakis	KHN71938.1	60.2	103	4.11e-33	0.0285954375970695	2.05155	Nr	KHN71938	Gamma-glutamyltranspeptidase 1 [Toxocara canis]	1038	INV	Ggt1	Toxocara canis	Gamma-glutamyltranspeptidase 1
A0.A5.NODE_17622_length_1450_cov_514.196162_g5339_i4	Anisakis	KHN82586.1	80.0	95	1.40e-40	0.00211842252863188	2.02804	Nr	KHN82586	Interferon-related developmental regulator 1 [Toxocara canis]	455	INV	IFRD1	Toxocara canis	Interferon-related developmental regulator 1
A0.A4.NODE_521_length_5603_cov_237.804926_g183_i1	Anisakis	KHN77544.1	33.1	1122	1.02e-164	0.0088946775508937	2.02483	Nr	KHN77544	Putative serine protease F56F10.1 [Toxocara canis]	986	INV	F56F10.1	Toxocara canis	putative serine protease F56F10.1
A0.A5.NODE_3606_length_3422_cov_129.363717_g1780_i0	Anisakis	KHN78690.1	61.5	697	4.27e-282	0.0127230007278882	2.02365	Nr	KHN78690	Peroxidasin -like protein [Toxocara canis]	1158	INV	pxn-1	Toxocara canis	Peroxidasin -like protein
A2.transcripts:Locus_4220_Transcript_24_24_Confidence_0.250_Length_1353	Anisakis	KAF1619451.1	51.2	303	1.64e-99	0.046504672082557	2.02258	Nr	KAF1619451	putative endochitinase, partial [Eudyptes robustus]	480	VRT	cht-1	Eudyptes robustus	putative endochitinase
A2.transcripts:Locus_17592_Transcript_24_35_Confidence_0.246_Length_1316	Anisakis	A0A0M3IZH2	83.7	258	1.94e-150	0.0323527276055256	2.02031	TrEMBL	A0A0M3IZH2_ANISI	NA	361	NA	ASIM_LOCUS555	Anisakis simplex	FA_desaturase domain-containing protein
A2.transcripts:Locus_2627_Transcript_1_14_Confidence_0.273_Length_2357	Anisakis	KHN85622.1	67.0	424	1.57e-194	0.0357243421452978	2.01874	Nr	KHN85622	Putative neutral sphingomyelinase [Toxocara canis]	378	INV	T27F6.6	Toxocara canis	putative neutral sphingomyelinase
A2.transcripts:Locus_18370_Transcript_28_38_Confidence_0.417_Length_2261	Anisakis	CRZ24793.1	80.0	320	4.25e-183	0.00864579537995938	2.01776	Nr	CRZ24793	BMA-RNR-2 [Brugia malayi]	365	INV	Bma-rnr-2	Brugia malayi	BMA-RNR-2
A2.transcripts:Locus_2512_Transcript_31_34_Confidence_0.333_Length_3850	Anisakis	KHN77497.1	87.4	506	1.53e-277	0.0025240698920964	2.01654	Nr	KHN77497	Protein lin-10 [Toxocara canis]	1139	INV	lin-10	Toxocara canis	Protein lin-10
A2.transcripts:Locus_1_Transcript_86364_107551_Confidence_0.000_Length_1702	Anisakis	KHN85171.1	71.5	309	8.42e-170	0.0268886767511246	2.01485	Nr	KHN85171	Beta-glucosidase 6 [Toxocara canis]	523	INV	BGLU6	Toxocara canis	Beta-glucosidase 6
A2.transcripts:Locus_15125_Transcript_5_13_Confidence_0.500_Length_3713	Anisakis	XP_020306460.1	77.7	628	0.0	0.0204487049517819	2.00946	Nr	XP_020306460	CAMK/CASK protein kinase [Loa loa]	1003	INV	NA	Loa loa	CAMK/CASK protein kinase
A1.A4.J2380186	Anisakis	A0A1I7X917	94.9	39	1.68e-18	3.16144657514078e-06	2.00838	TrEMBL	A0A1I7X917_HETBA	NA	79	NA	NA	Heterorhabditis bacteriophora	Gamma-cystathionase
A2.transcripts:Locus_1208_Transcript_7_7_Confidence_0.000_Length_440	Anisakis	A0A0B2V3M7	84.7	72	4.65e-26	0.0242033570718312	1.99833	TrEMBL	A0A0B2V3M7_TOXCA	NA	378	NA	Tcan_15655	Toxocara canis	G_PROTEIN_RECEP_F1_2 domain-containing protein
A2.transcripts:Locus_3_Transcript_14320_70181_Confidence_0.000_Length_9568	Anisakis	A0A158R4D4	78.8	1092	0.0	0.0266441599126986	1.99506	TrEMBL	A0A158R4D4_9BILA	NA	1080	NA	NA	Syphacia muris	AAA domain-containing protein
A2.transcripts:Locus_19313_Transcript_13_15_Confidence_0.394_Length_653	Anisakis	KHN74330.1	71.4	98	7.64e-43	0.00703576389282167	1.99497	Nr	KHN74330	Myosin-2 essential light chain [Toxocara canis]	148	INV	Mlc-c	Toxocara canis	Myosin-2 essential light chain
A0.A1.NODE_3511_length_3668_cov_26.501527_g1823_i0	Anisakis	XP_020303521.1	54.4	333	5.16e-83	0.0202514458854685	1.99294	Nr	XP_020303521	FHA domain-containing protein [Loa loa]	679	INV	NA	Loa loa	FHA domain-containing protein
A2.transcripts:Locus_521_Transcript_16_64_Confidence_0.176_Length_1452	Anisakis	F1L0U1	95.4	153	4.45e-99	0.0214300873901903	1.9927	TrEMBL	F1L0U1_ASCSU	NA	221	NA	NA	Ascaris suum	40S ribosomal protein S4
A2.transcripts:Locus_5373_Transcript_2_3_Confidence_0.500_Length_732	Anisakis	A0A0M3HXT2	68.8	141	1.15e-64	0.00079855055677564	1.99188	TrEMBL	A0A0M3HXT2_ASCLU	NA	141	NA	NA	Ascaris lumbricoides	2Fe-2S ferredoxin-type domain-containing protein
A2.transcripts:Locus_1_Transcript_104805_107551_Confidence_0.000_Length_6408	Anisakis	KHN82741.1	84.7	391	1.56e-216	0.0409426348540566	1.99136	Nr	KHN82741	Zinc finger protein [Toxocara canis]	653	INV	ZNF277	Toxocara canis	Zinc finger protein
A2.transcripts:Locus_2720_Transcript_1_94_Confidence_0.014_Length_1741	Anisakis	OZC11659.1	91.4	222	3.09e-152	0.0181789036312459	1.98245	Nr	OZC11659	c-terminal tandem repeated domain in type 4 procollagen [Onchocerca flexuosa]	292	INV	NA	Onchocerca flexuosa	c-terminal tandem repeated domain in type 4 procollagen
A2.transcripts:Locus_98_Transcript_86_144_Confidence_0.031_Length_1346	Anisakis	A0A158PPJ3	87.6	282	9.12e-157	7.96934821648716e-06	1.976	TrEMBL	A0A158PPJ3_ANISI	NA	726	NA	ASIM_LOCUS14254	Anisakis simplex	PlsC domain-containing protein
A0.A3.NODE_8251_length_802_cov_850.068564_g2229_i1	Anisakis	A0A0B2VZQ7	48.4	91	7.49e-17	0.00982706068477409	1.97006	TrEMBL	A0A0B2VZQ7_TOXCA	NA	246	NA	Tcan_16034	Toxocara canis	HIG1 domain-containing protein
A0.A6.NODE_3426_length_2890_cov_47.399860_g2102_i0	Anisakis	A0A0M3JVM1	95.7	464	5.44e-301	0.0143395839762004	1.96718	TrEMBL	A0A0M3JVM1_ANISI	NA	534	NA	ASIM_LOCUS11743	Anisakis simplex	WD_REPEATS_REGION domain-containing protein
A2.transcripts:Locus_1_Transcript_62587_107551_Confidence_0.000_Length_1890	Anisakis	XP_001897090.1	33.1	136	1.43e-11	0.021946380839839	1.96338	Nr	XP_001897090	Zinc finger, C2H2 type family protein [Brugia malayi]	293	INV	NA	Brugia malayi	Zinc finger, C2H2 type family protein
A0.A4.NODE_9901_length_2056_cov_301.006948_g2716_i1	Anisakis	A0A0M3HN98	89.7	330	1.48e-214	0.000526652271371127	1.96128	TrEMBL	A0A0M3HN98_ASCLU	NA	566	NA	NA	Ascaris lumbricoides	Aminotran_1_2 domain-containing protein
A2.transcripts:Locus_1_Transcript_30555_107551_Confidence_0.000_Length_1172	Anisakis	KAF1619451.1	52.9	227	1.40e-72	0.0338610507485041	1.95995	Nr	KAF1619451	putative endochitinase, partial [Eudyptes robustus]	480	VRT	cht-1	Eudyptes robustus	putative endochitinase
A0.A1.NODE_13491_length_1811_cov_112.168578_g6279_i0	Anisakis	KHN88903.1	57.5	73	1.19e-14	0.0461880573610904	1.95637	Nr	KHN88903	Post-GPI attachment to proteins factor 2-like [Toxocara canis]	323	INV	NA	Toxocara canis	Post-GPI attachment to proteins factor 2-like
A0.A4.NODE_5061_length_2987_cov_260.834012_g2700_i0	Anisakis	A0A183UAQ6	29.0	637	1.12e-50	0.00573714565482051	1.95613	TrEMBL	A0A183UAQ6_TOXCA	NA	744	NA	TCNE_LOCUS5576	Toxocara canis	60S ribosomal protein L27
A2.transcripts:Locus_2037_Transcript_37_69_Confidence_0.140_Length_3167	Anisakis	KHN78690.1	50.7	1157	0.0	0.0105140140431914	1.95207	Nr	KHN78690	Peroxidasin -like protein [Toxocara canis]	1158	INV	pxn-1	Toxocara canis	Peroxidasin -like protein
A0.A3.NODE_1542_length_1935_cov_237.208814_g1230_i0	Anisakis	KHJ99356.1	41.5	94	4.51e-12	0.00210981689602689	1.95132	Nr	KHJ99356	thrombospondin type 1 domain protein [Oesophagostomum dentatum]	536	INV	NA	Oesophagostomum dentatum	thrombospondin type 1 domain protein
A0.A1.NODE_19469_length_1238_cov_21.042699_g8819_i0	Anisakis	KHN81970.1	68.4	79	6.50e-22	0.0179289426648634	1.94763	Nr	KHN81970	Major facilitator superfamily domain-containing protein 8 [Toxocara canis]	543	INV	mfsd8	Toxocara canis	Major facilitator superfamily domain-containing protein 8
A2.transcripts:Locus_3_Transcript_36250_70181_Confidence_0.000_Length_6241	Anisakis	KHN82677.1	60.1	1750	0.0	0.00206927232831508	1.93557	Nr	KHN82677	ATP-binding cassette sub-family A member 3 [Toxocara canis]	1711	INV	ABCA3	Toxocara canis	ATP-binding cassette sub-family A member 3
A2.transcripts:Locus_3_Transcript_27117_70181_Confidence_0.000_Length_1776	Anisakis	A0A0M3HUQ6	75.8	219	4.17e-112	0.0128385444713284	1.92811	TrEMBL	A0A0M3HUQ6_ASCLU	NA	342	NA	NA	Ascaris lumbricoides	AB hydrolase-1 domain-containing protein
A2.transcripts:Locus_1744_Transcript_63_111_Confidence_0.054_Length_3056	Anisakis	A0A0M3JWG7	98.6	291	1.46e-190	0.0431876772179762	1.92647	TrEMBL	A0A0M3JWG7_ANISI	Phosphodeoxyriboaldolase	291	NA	ASIM_LOCUS12088	Anisakis simplex	2-deoxy-D-ribose 5-phosphate aldolase
A1.A6.J1032124	Anisakis	A0A0M3K0K7	96.7	90	8.71e-52	0.0296015713684013	1.92481	TrEMBL	A0A0M3K0K7_ANISI	NA	207	NA	ASIM_LOCUS13773	Anisakis simplex	SH3 domain-containing protein
A2.transcripts:Locus_694_Transcript_22_24_Confidence_0.077_Length_1686	Anisakis	KHN79273.1	73.9	322	3.60e-174	0.0413706680896497	1.92455	Nr	KHN79273	Prostatic acid phosphatase [Toxocara canis]	745	INV	ACPP	Toxocara canis	Prostatic acid phosphatase
A2.transcripts:Locus_1_Transcript_32283_107551_Confidence_0.000_Length_3309	Anisakis	CDQ05468.1	61.0	136	8.77e-38	0.0057904004096636	1.92387	Nr	CDQ05468	Bm8428, partial [Brugia malayi]	130	INV	Bm8428	Brugia malayi	Bm8428
A2.transcripts:Locus_12617_Transcript_9_11_Confidence_0.206_Length_1883	Anisakis	A0A0B2VGM7	79.7	335	3.61e-190	0.0383485337487358	1.92335	TrEMBL	A0A0B2VGM7_TOXCA	NA	476	NA	rom-1	Toxocara canis	Rhomboid protease
[truncated: 2,251 more rows]
